# Supplementary material for: A general method for asymmetric arylation and vinylation of silyl ketene acetals
Source: Royal Society of Chemistry journal article supplement (doi:10.1039/c4qo00027g), 2014-01-01

## **A General Method for Asymmetric Arylation and Vinylation of Silyl Ketene Acetals**

Junfeng Yang and Jianrong (Steve) Zhou\*

*Division of Chemistry and Biological Chemistry,  
School of Physical and Mathematical Sciences, Nanyang Technological University, Singapore 637371  
E-mail: jrzhou@ntu.edu.sg*

Supporting Information: NMR spectra

JF11-56-1-redo CDC13 1HNMR BBFO2  
2013-08-05

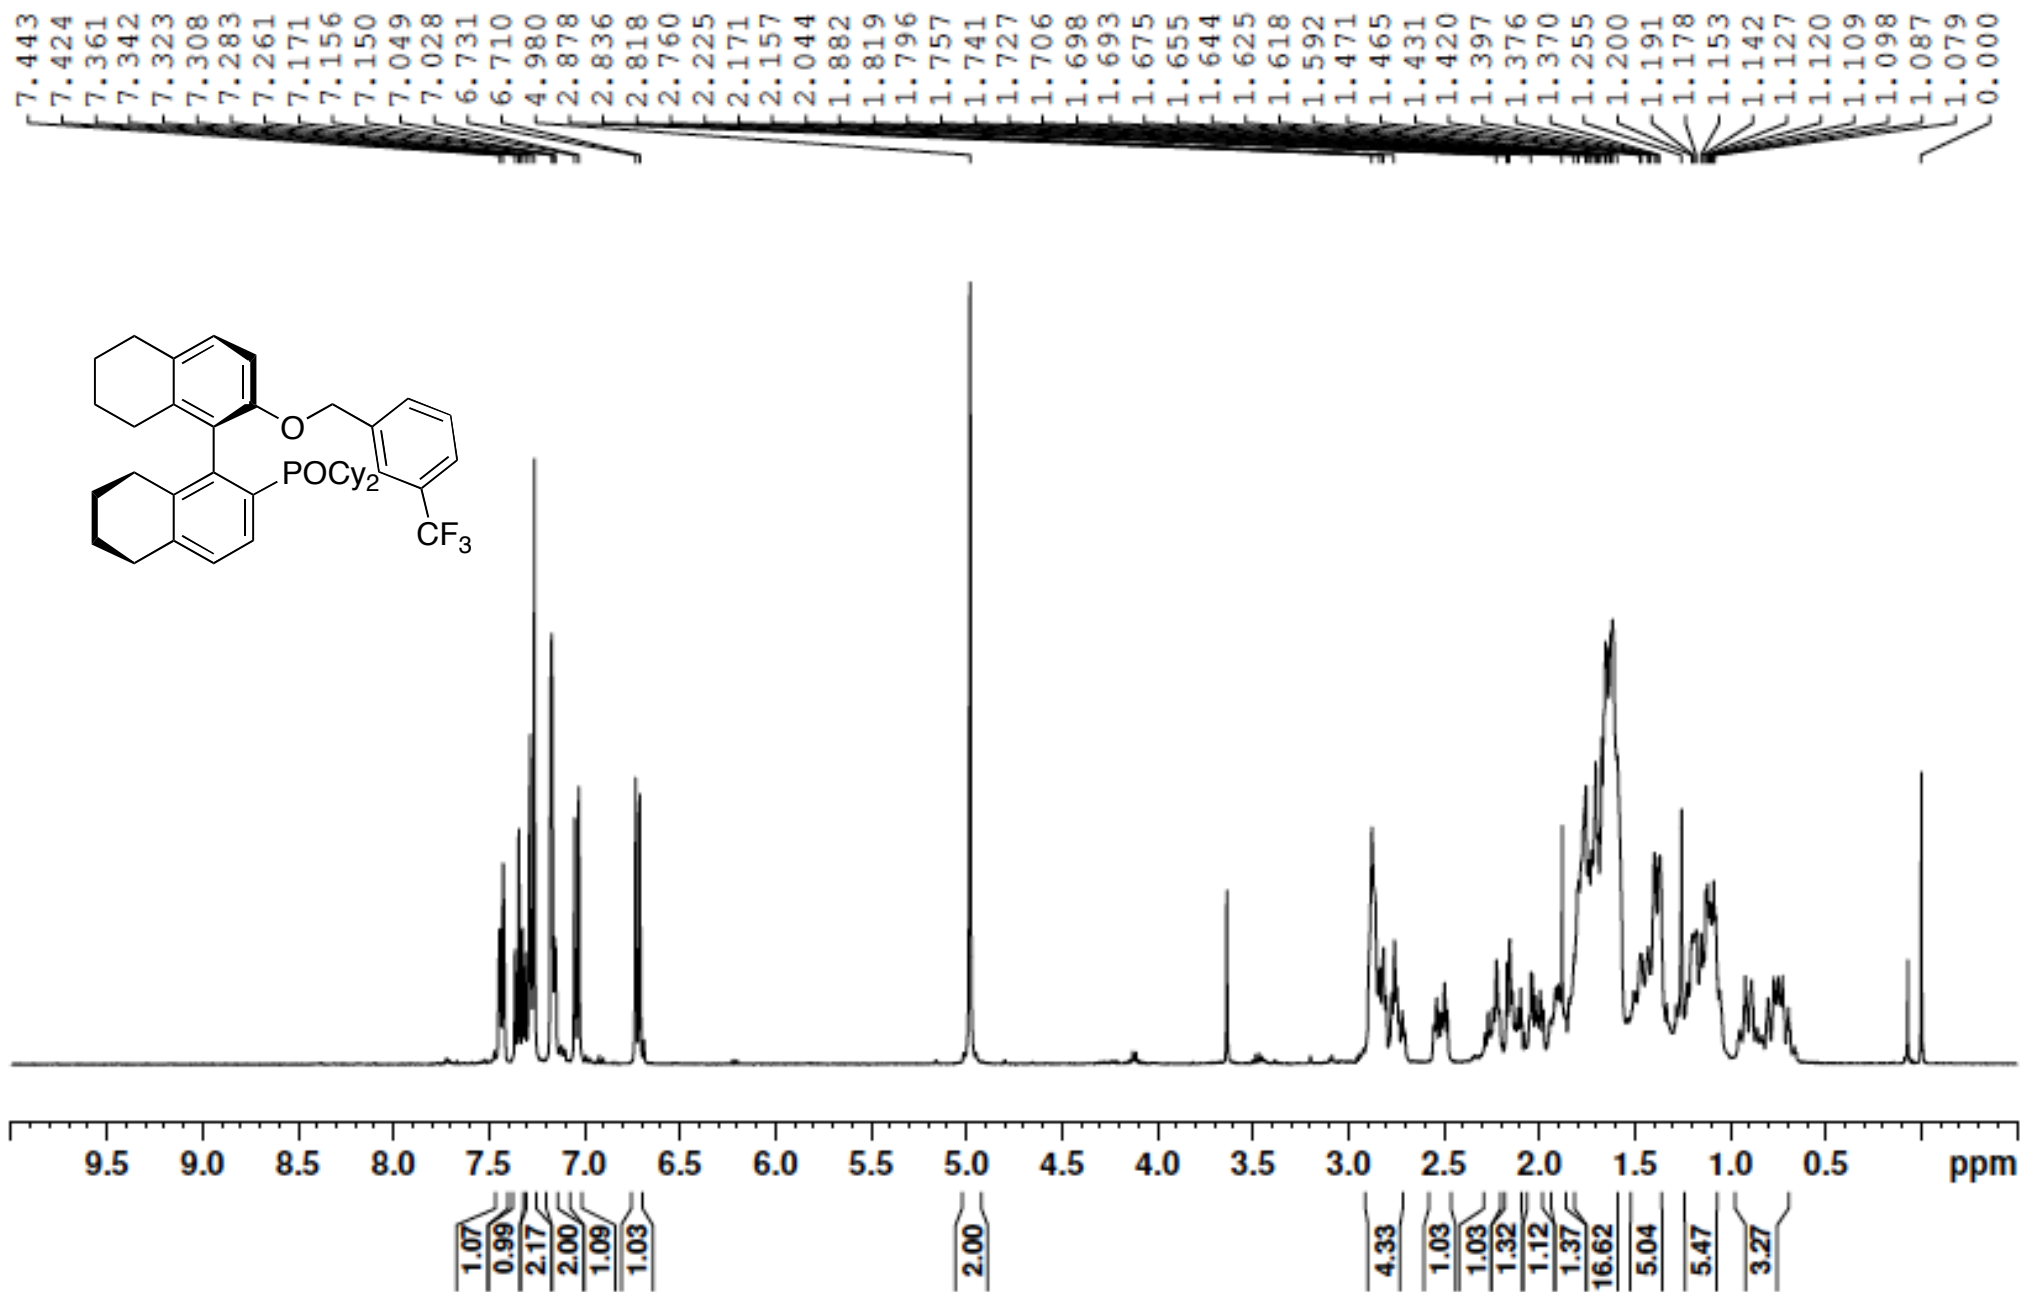

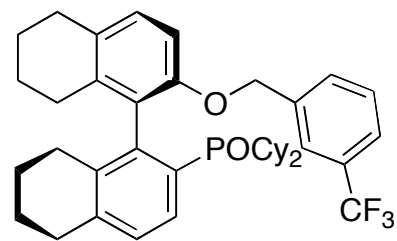

—45.59

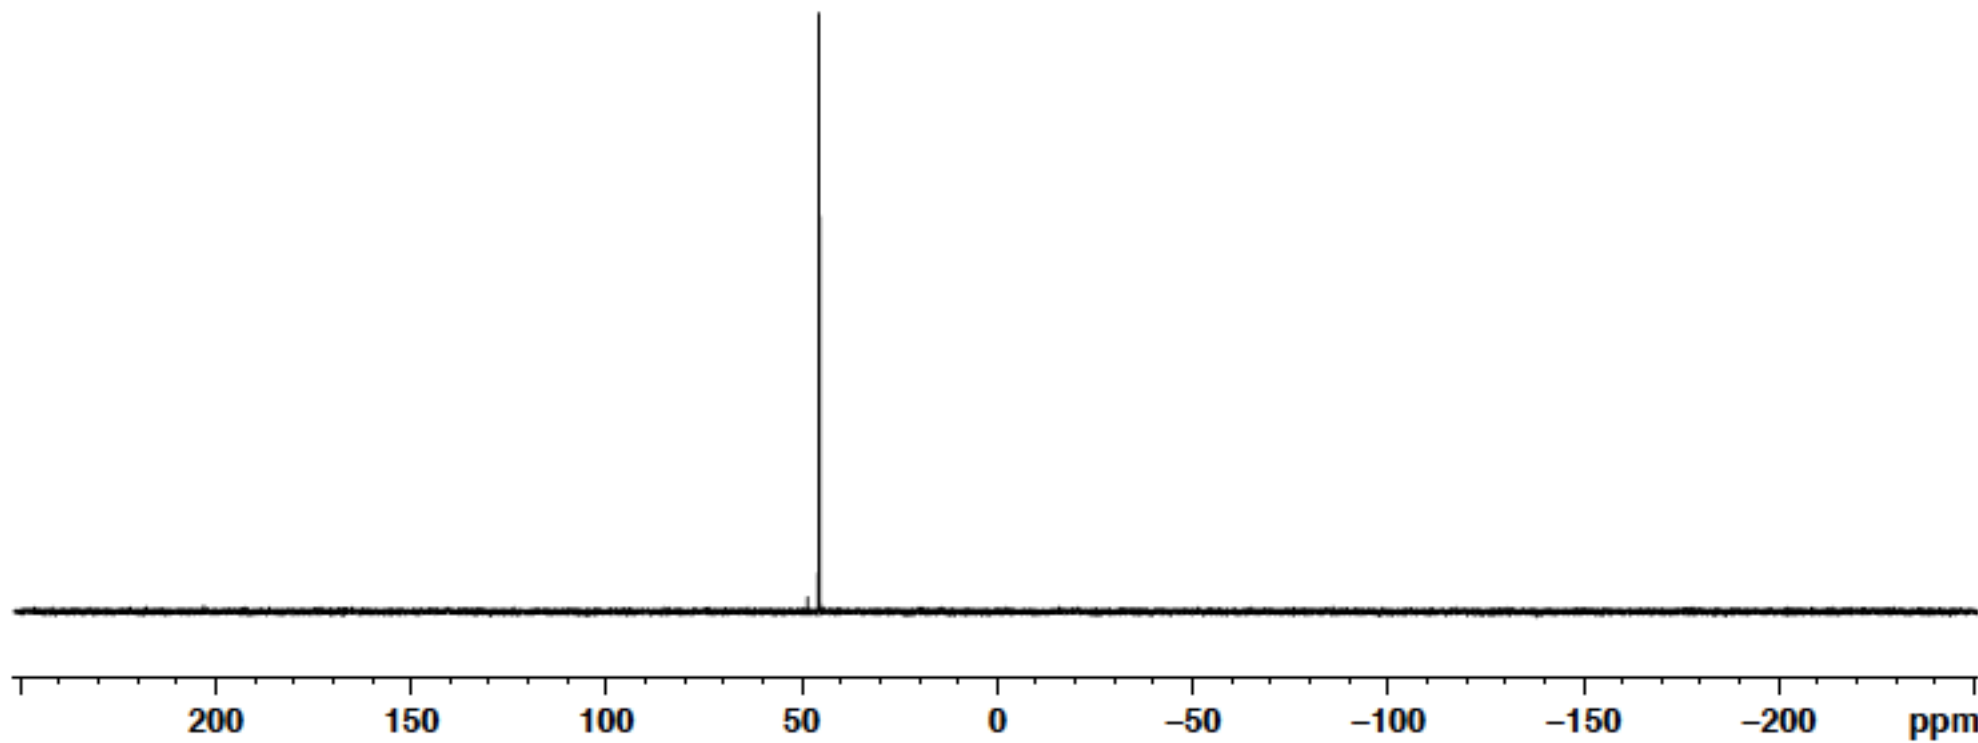

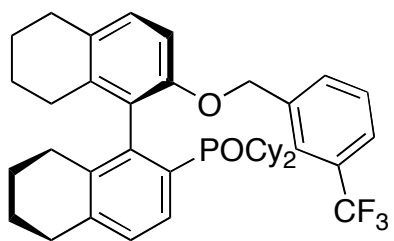

— -62.78

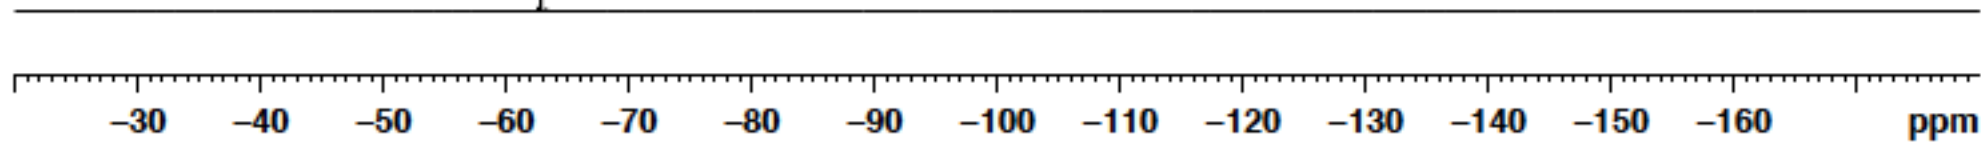

JF9099 1HNMR BBFO1 CDC13

2013-8-4

7.445  
7.426  
7.360  
7.341  
7.322  
7.306  
7.279  
7.259  
7.252  
7.235  
7.114  
7.094  
7.077  
7.056  
6.709  
6.688  
5.020  
4.988  
4.925  
4.892  
2.848  
2.814  
2.798  
2.771  
2.285  
2.139  
1.749  
1.737  
1.721  
1.678  
1.652  
1.637  
1.622  
1.601  
1.570  
1.526  
1.501  
1.497  
1.432  
1.363  
1.335  
1.297  
1.259  
1.239  
1.217  
1.208  
1.202  
1.188  
1.180  
1.157  
1.149  
0.915  
0.895  
0.881  
0.864  
0.854  
0.829  
0.071  
0.000

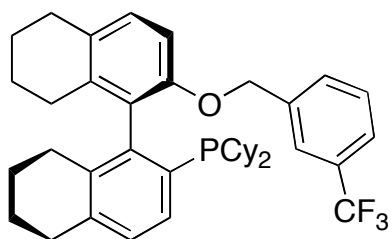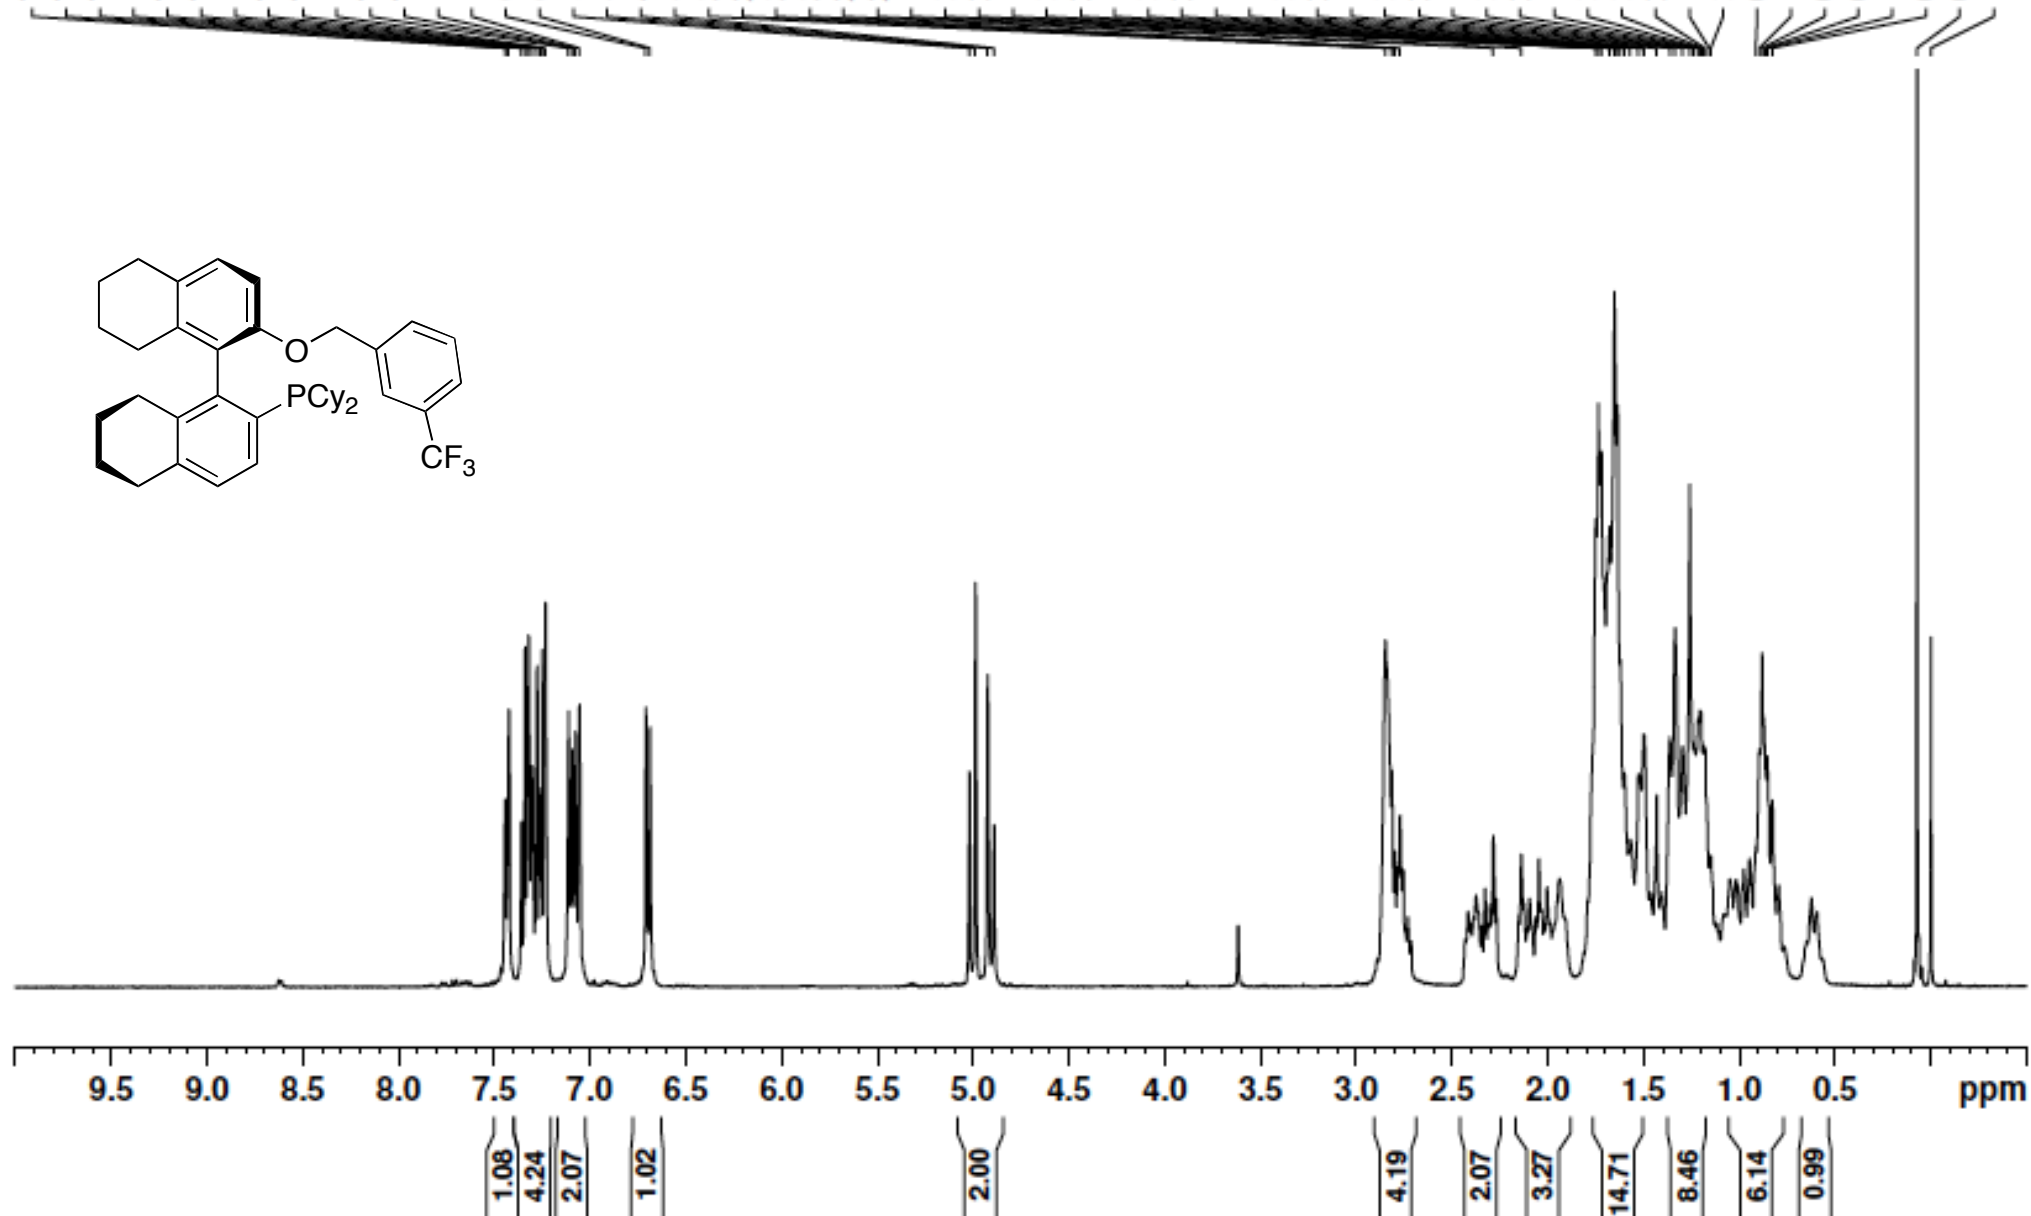

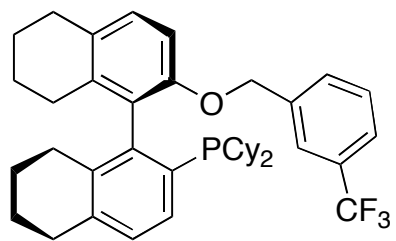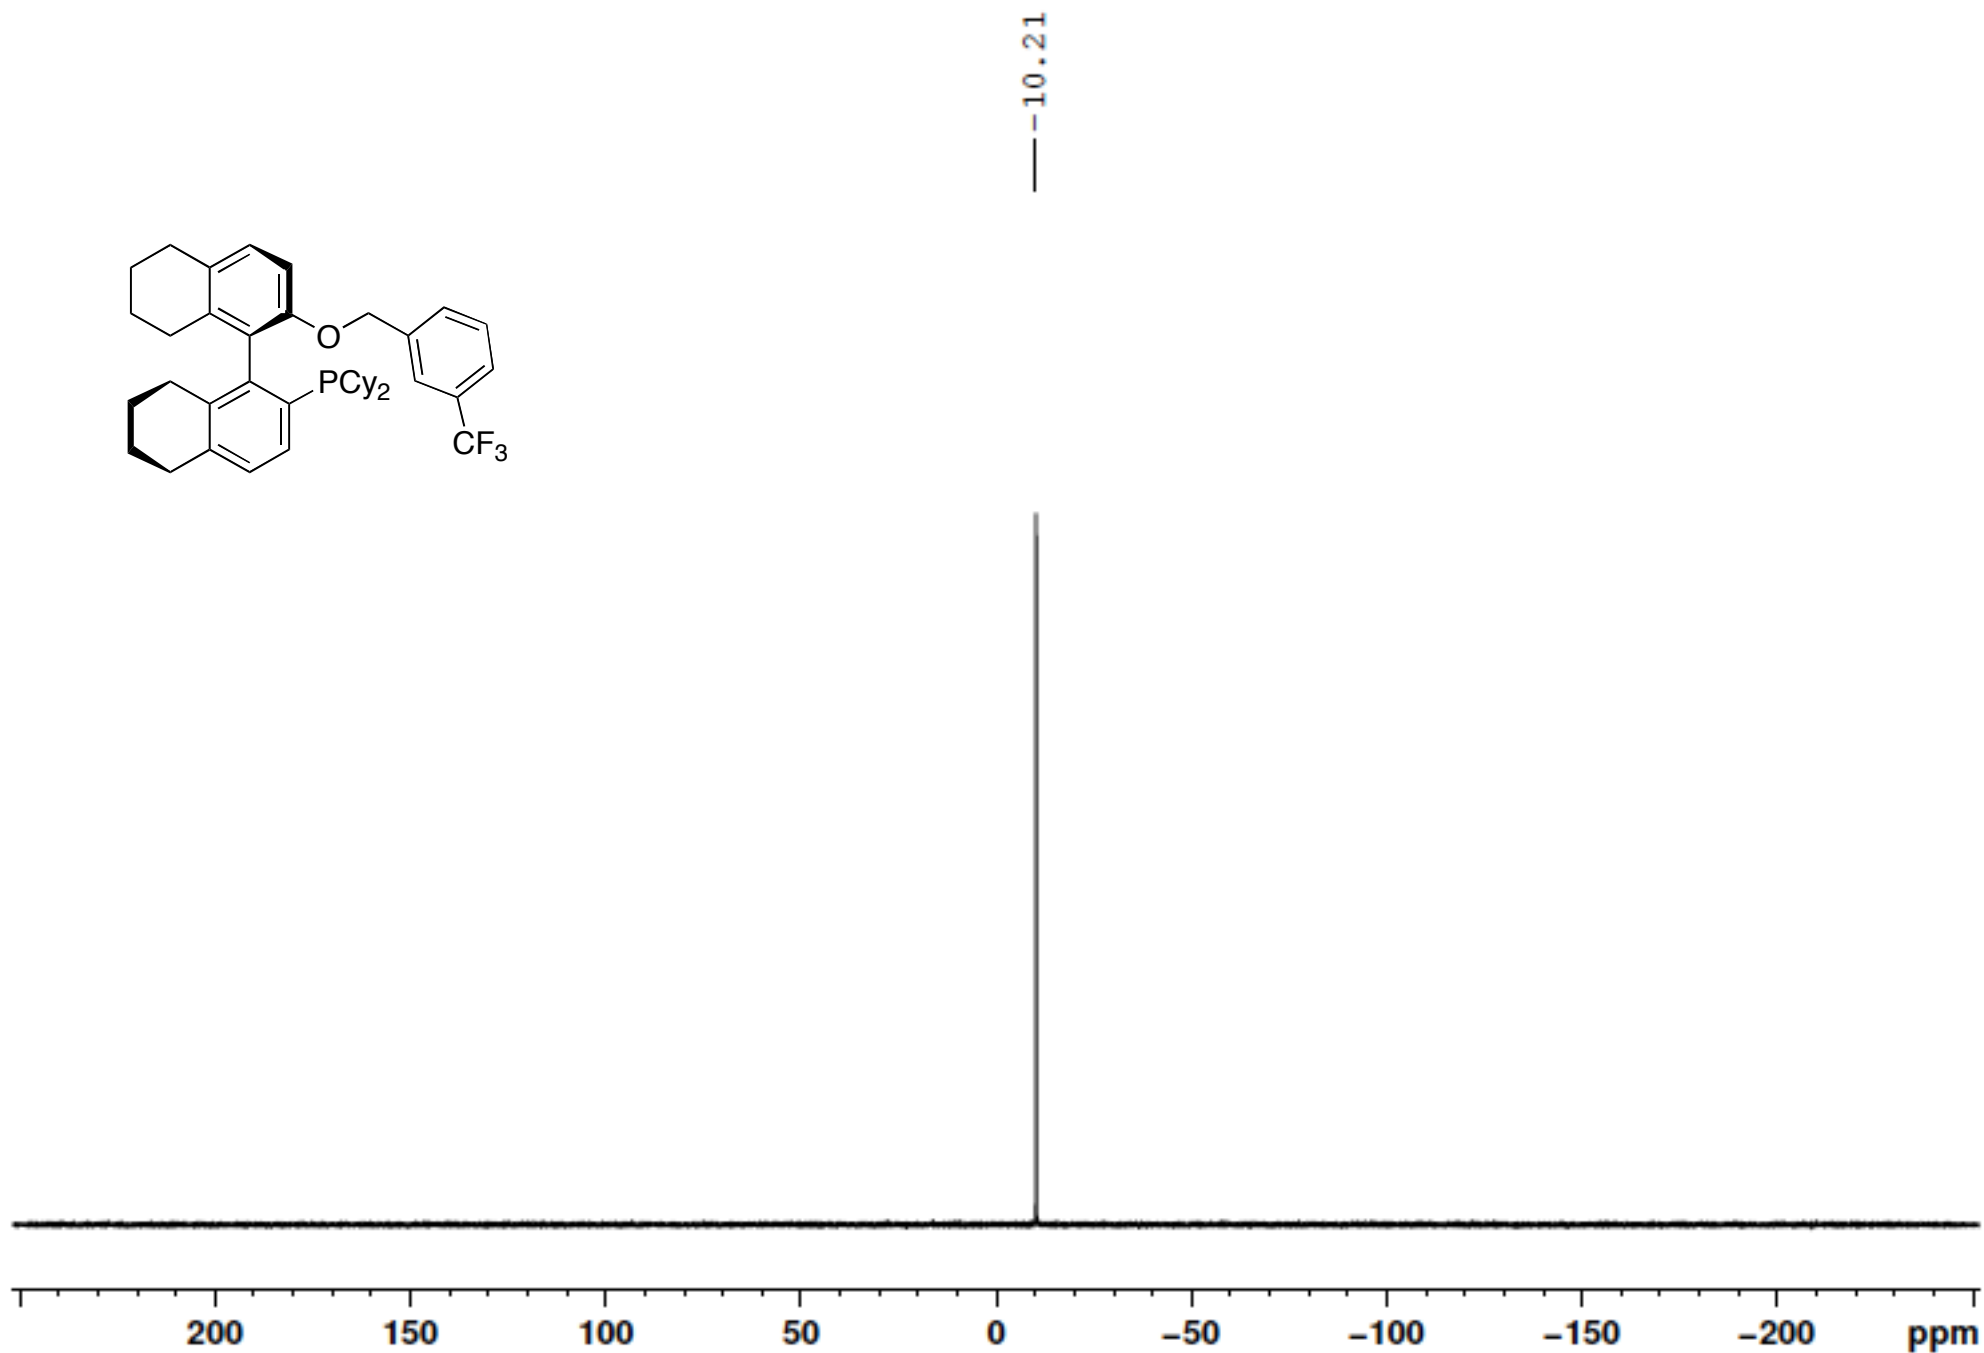

— -62.79

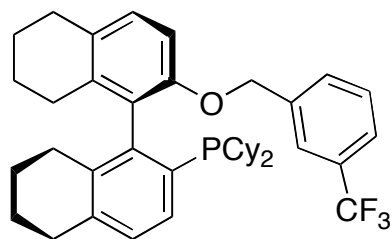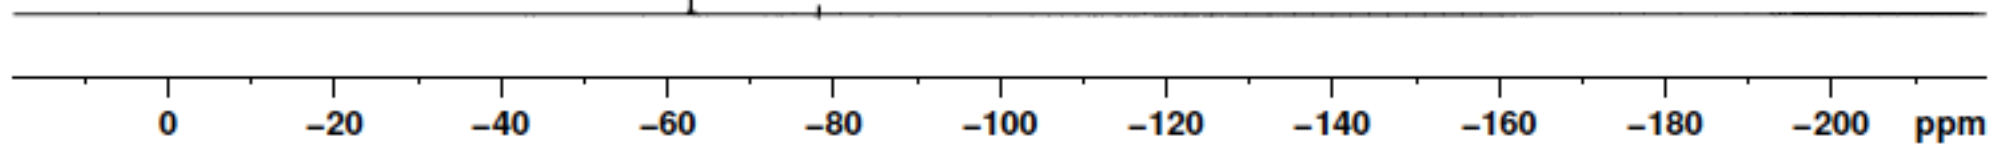

JF-L5 CNMR  
BBFO1 400M  
2014-01-25

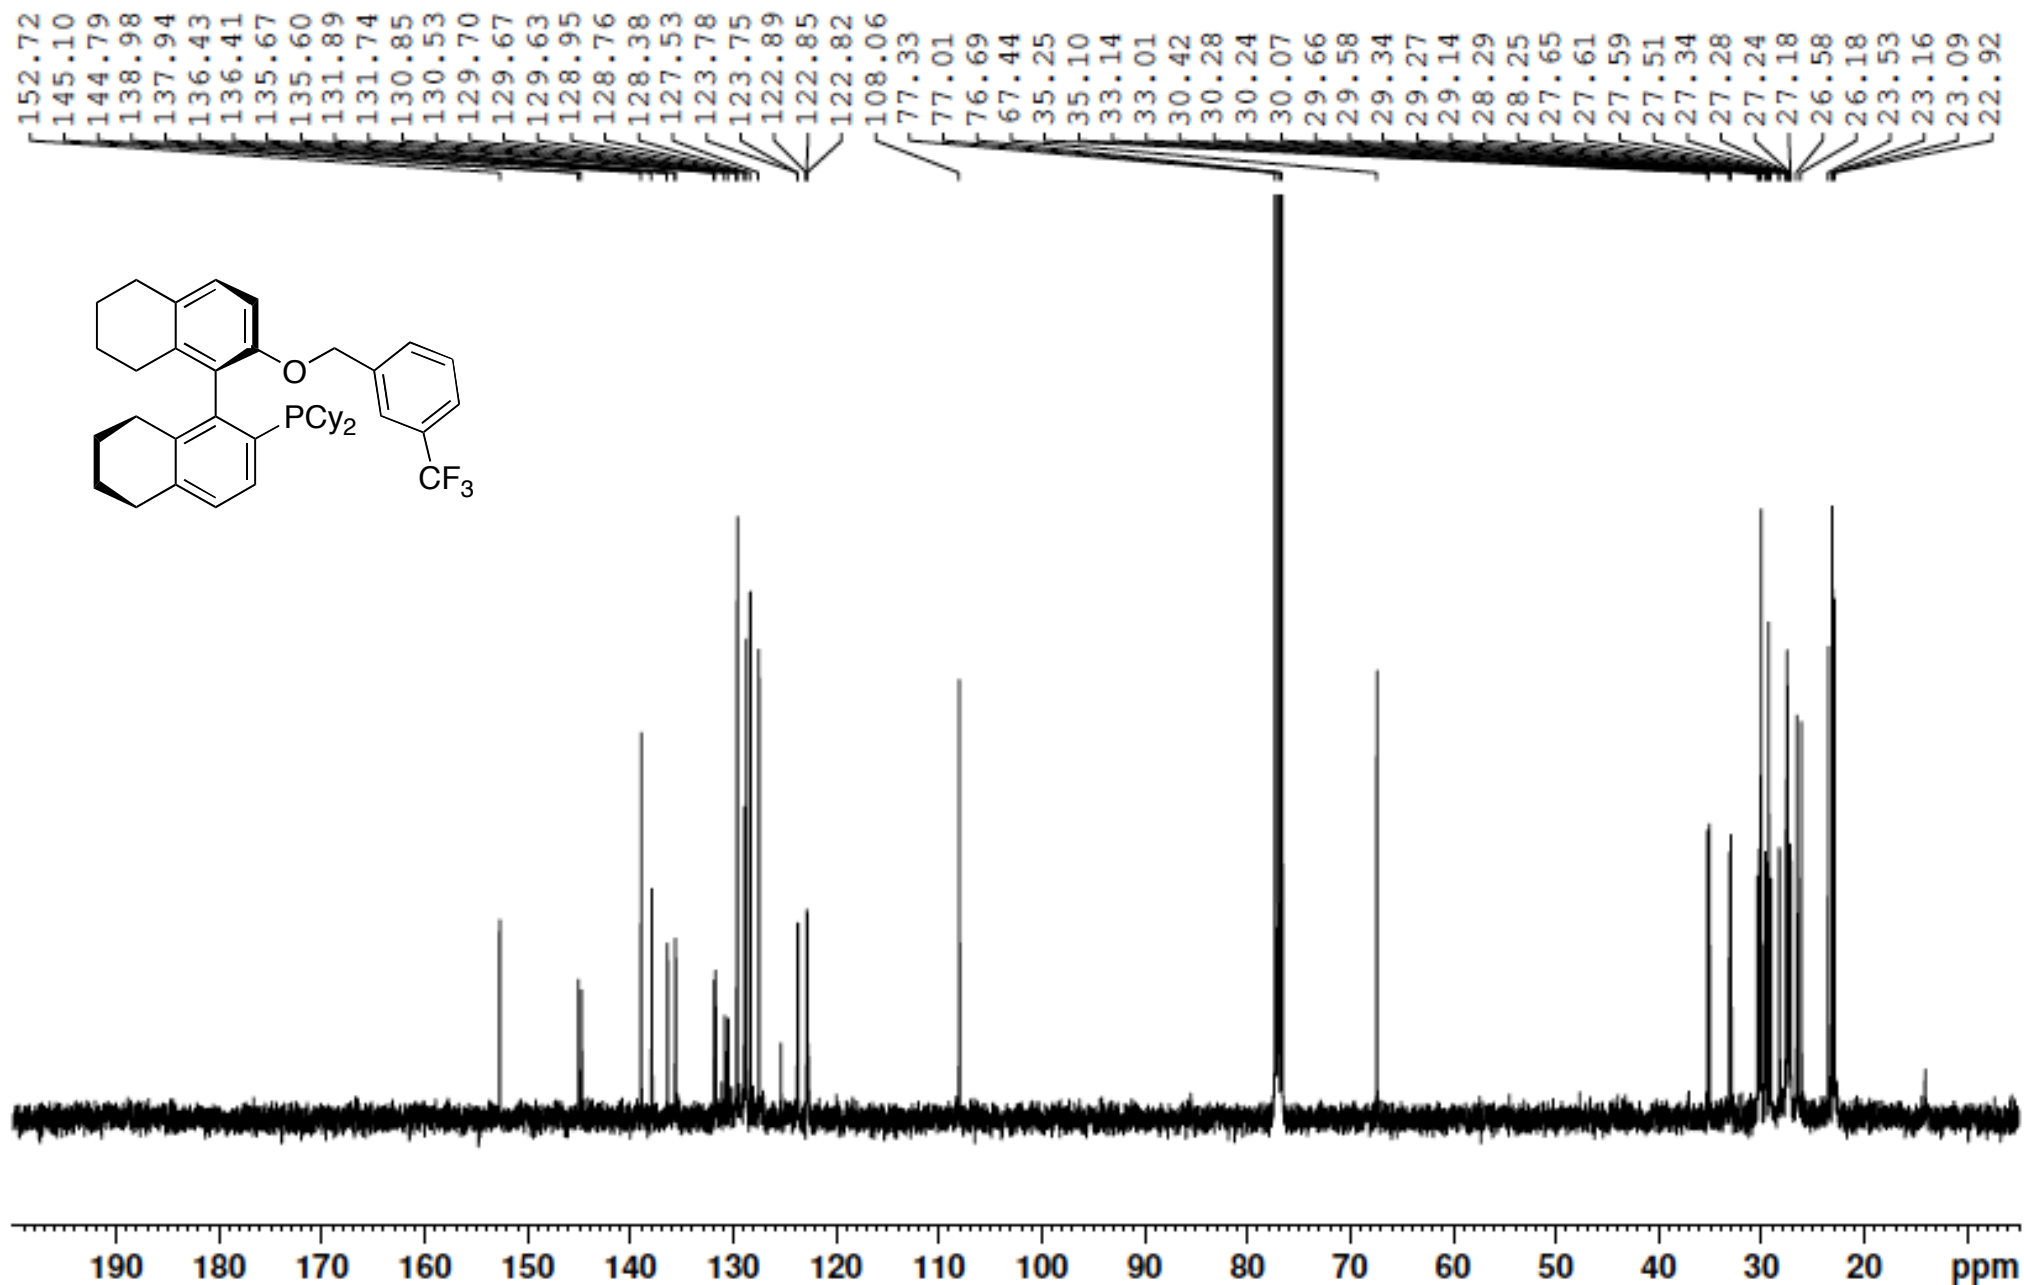



JF11-52-3-oxide CDC13 1HNMR BBFO2  
2013-08-02

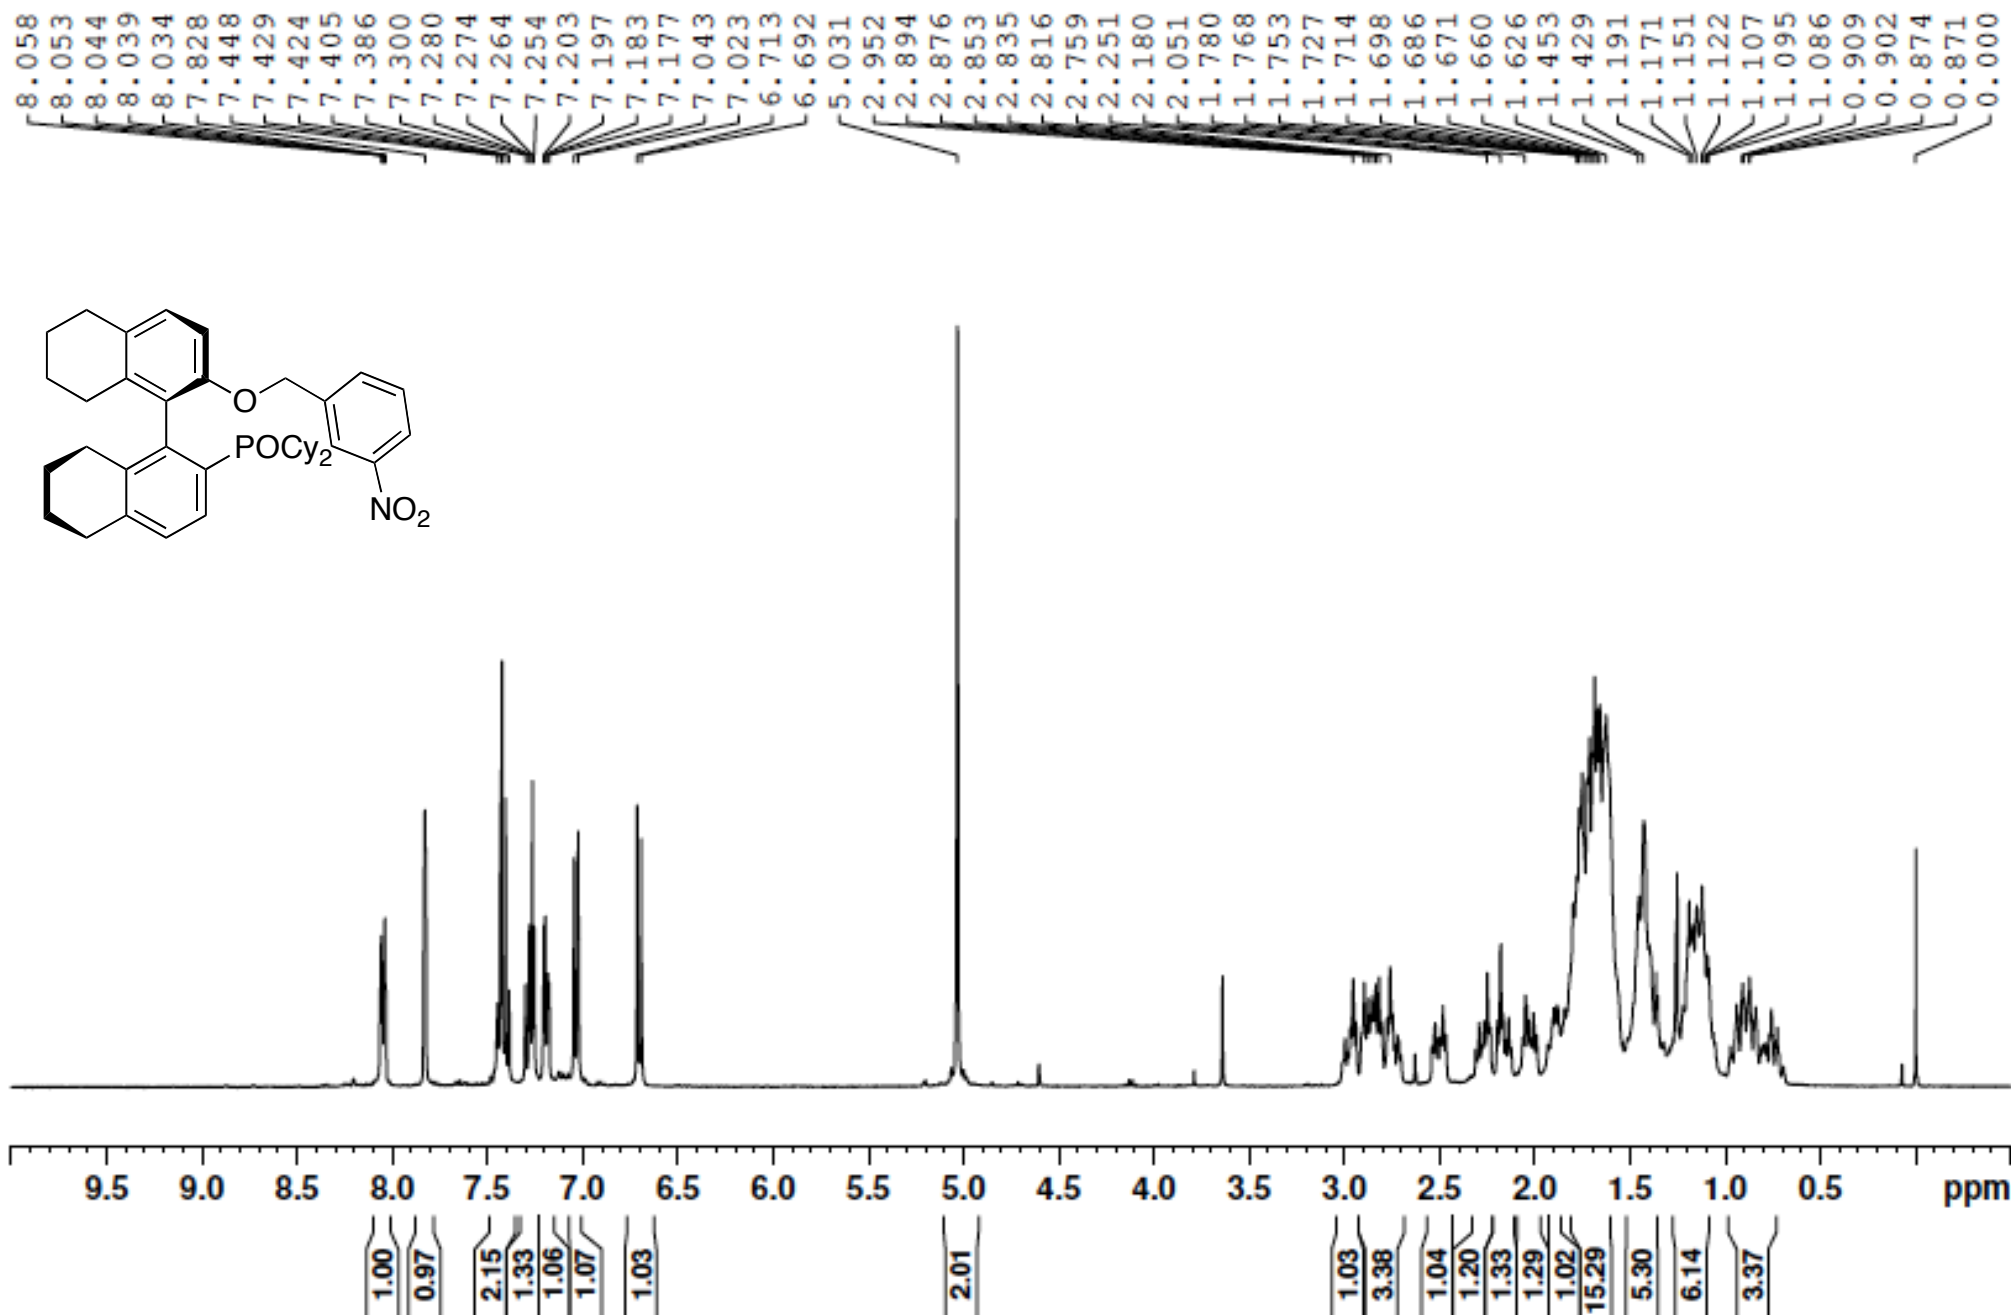

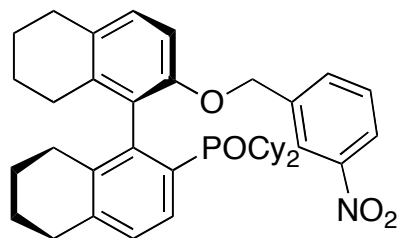

—44.95

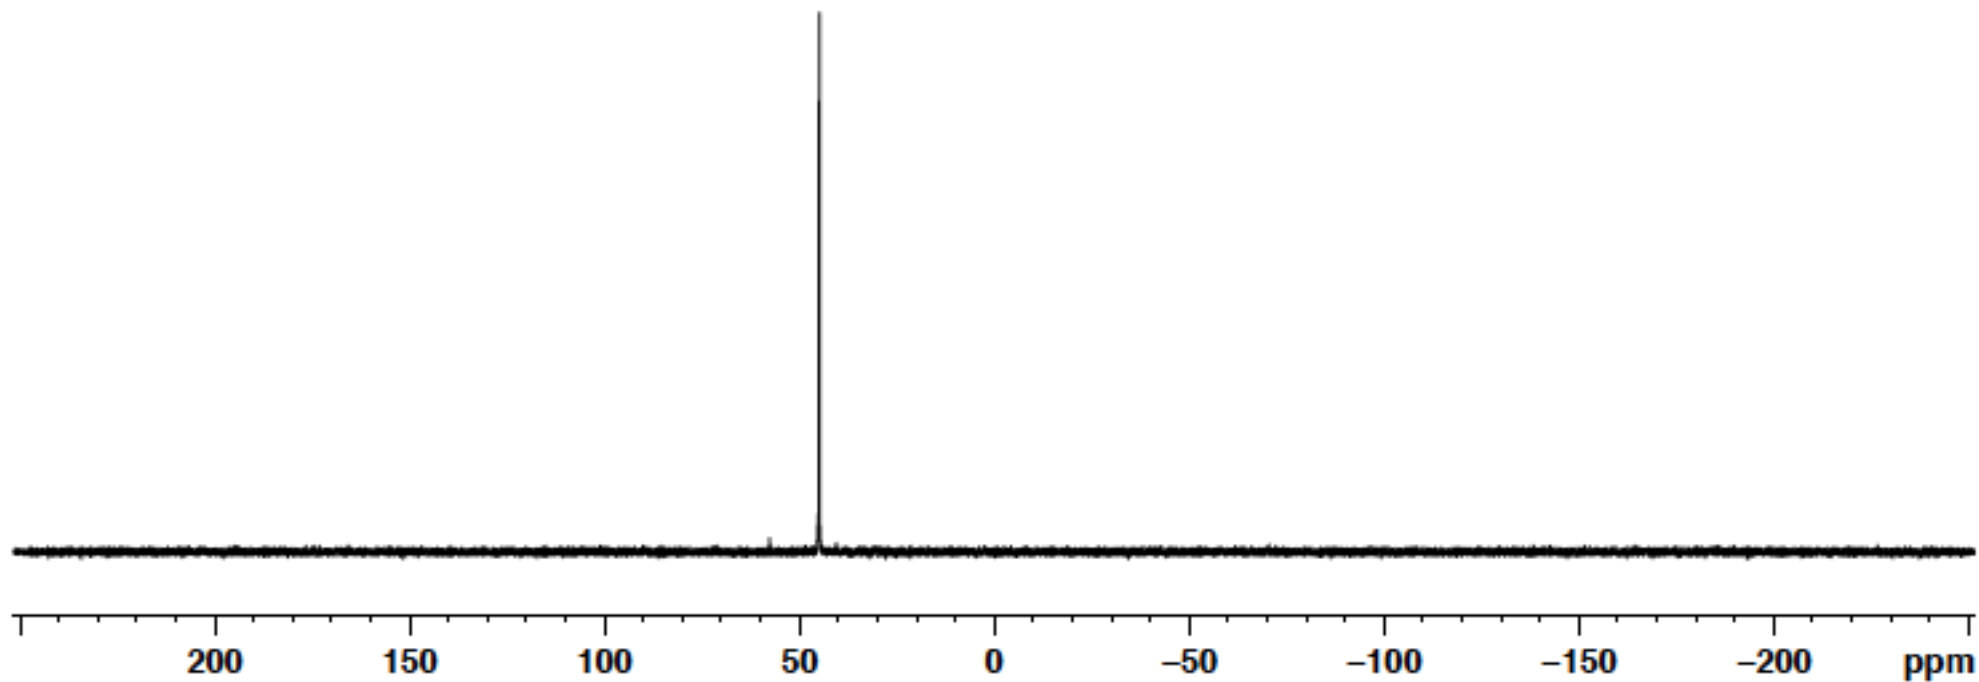

JF11-52-3-redo 1HNMR BBFO1 CDC13  
2013-8-4

7.325  
7.309  
7.253  
7.092  
7.072  
7.037  
7.024  
7.016  
7.005  
6.985  
6.696  
6.675  
6.518  
6.500  
6.486  
6.480  
6.330  
4.891  
4.859  
4.830  
4.798  
3.484  
2.858  
2.844  
2.828  
2.795  
2.750  
2.361  
2.335  
2.318  
2.126  
2.016  
1.973  
1.753  
1.724  
1.710  
1.700  
1.683  
1.670  
1.662  
1.655  
1.619  
1.556  
1.488  
1.464  
1.430  
1.268  
1.239  
1.211  
1.186  
1.076  
1.045  
1.013  
1.006  
0.974  
0.944  
0.912  
0.070  
0.000

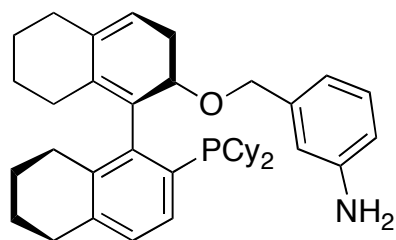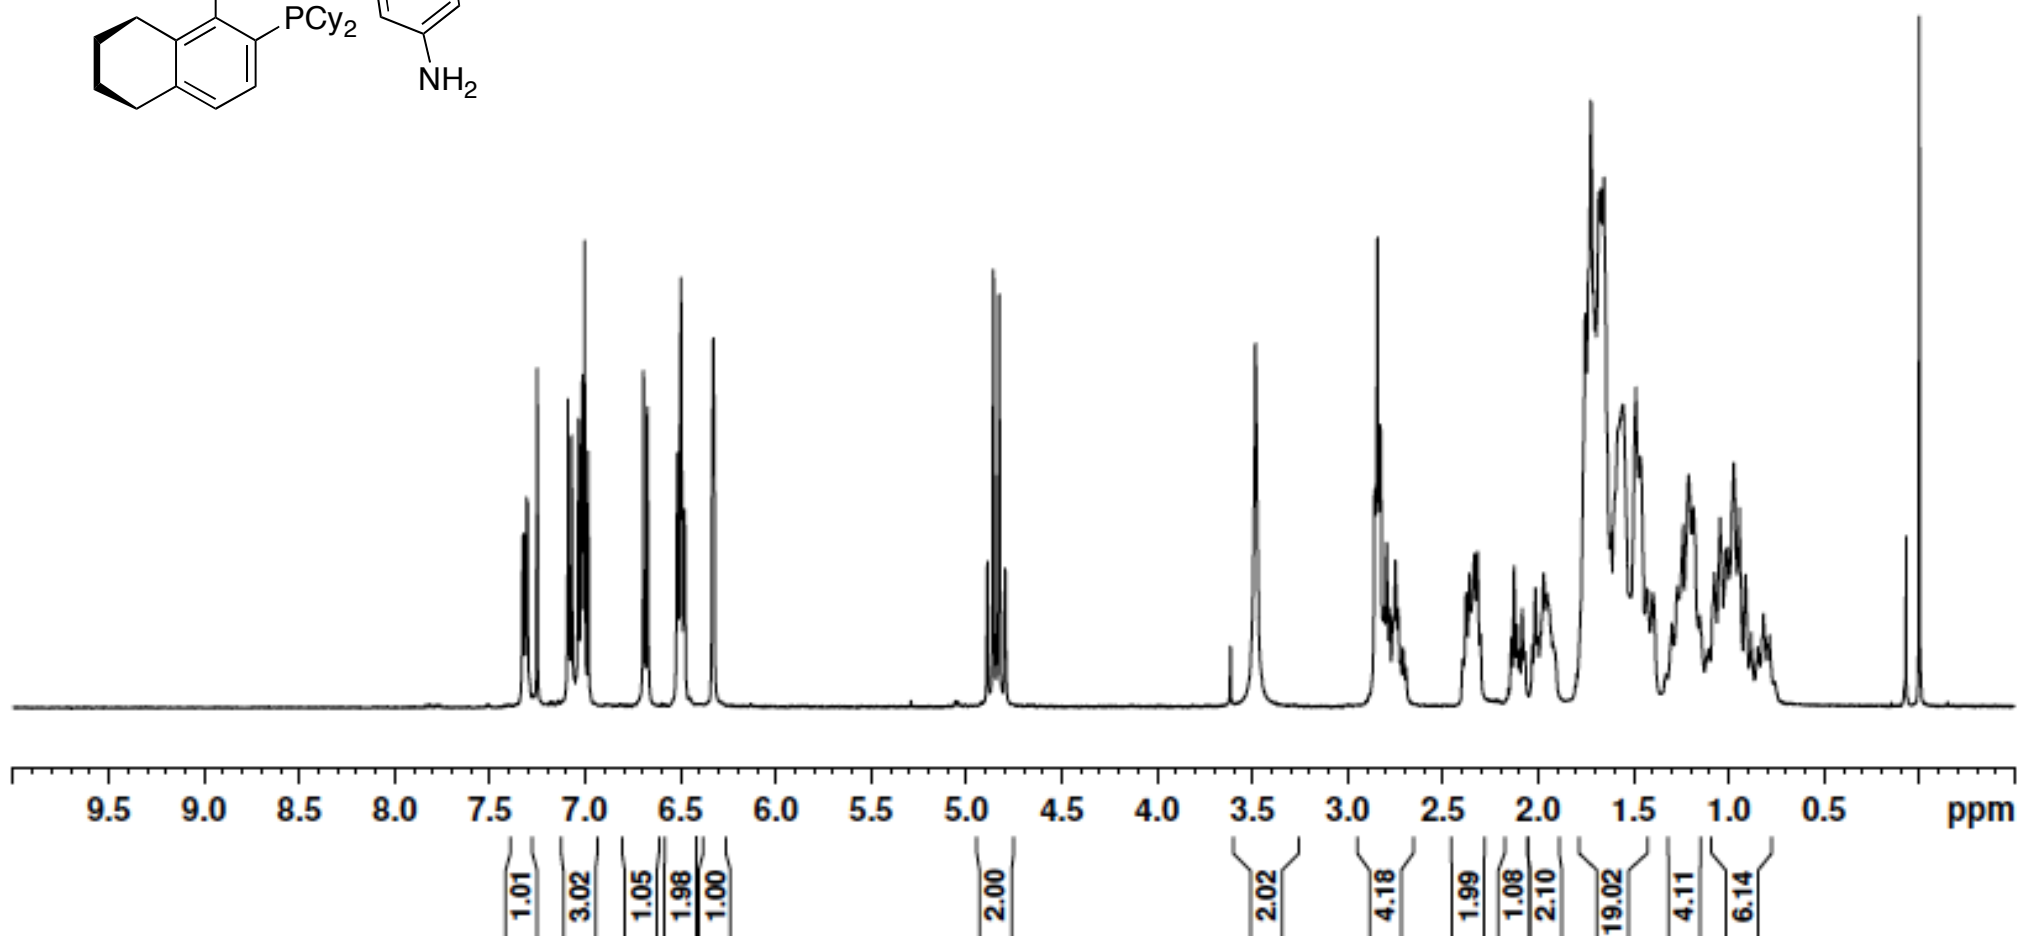

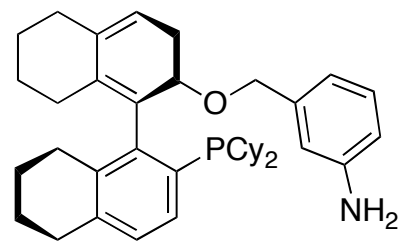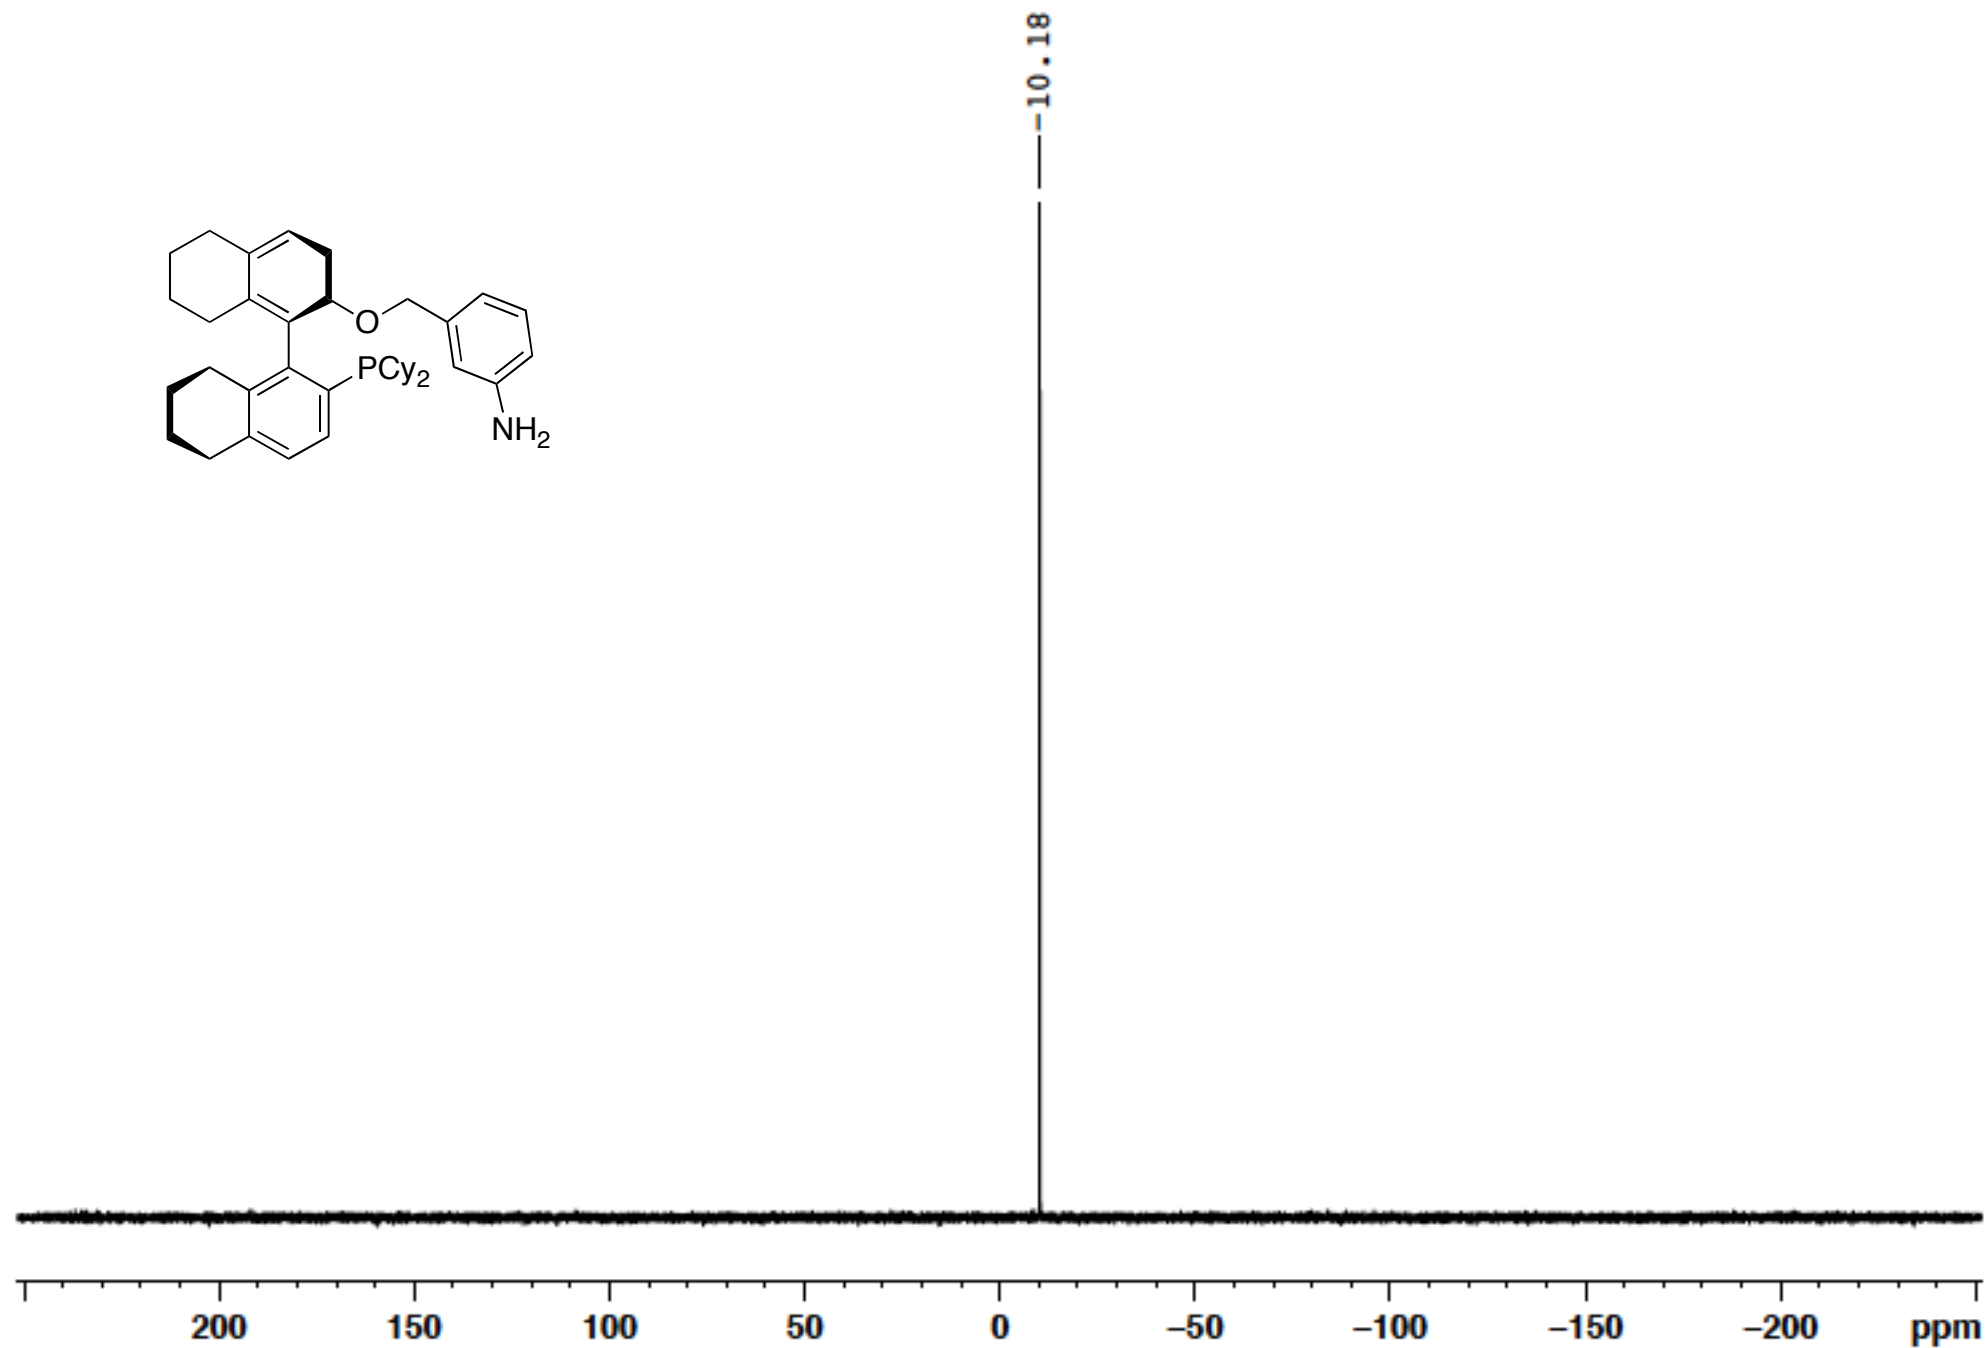

JF-L6-redo CNMR  
AV400  
2014-01-25

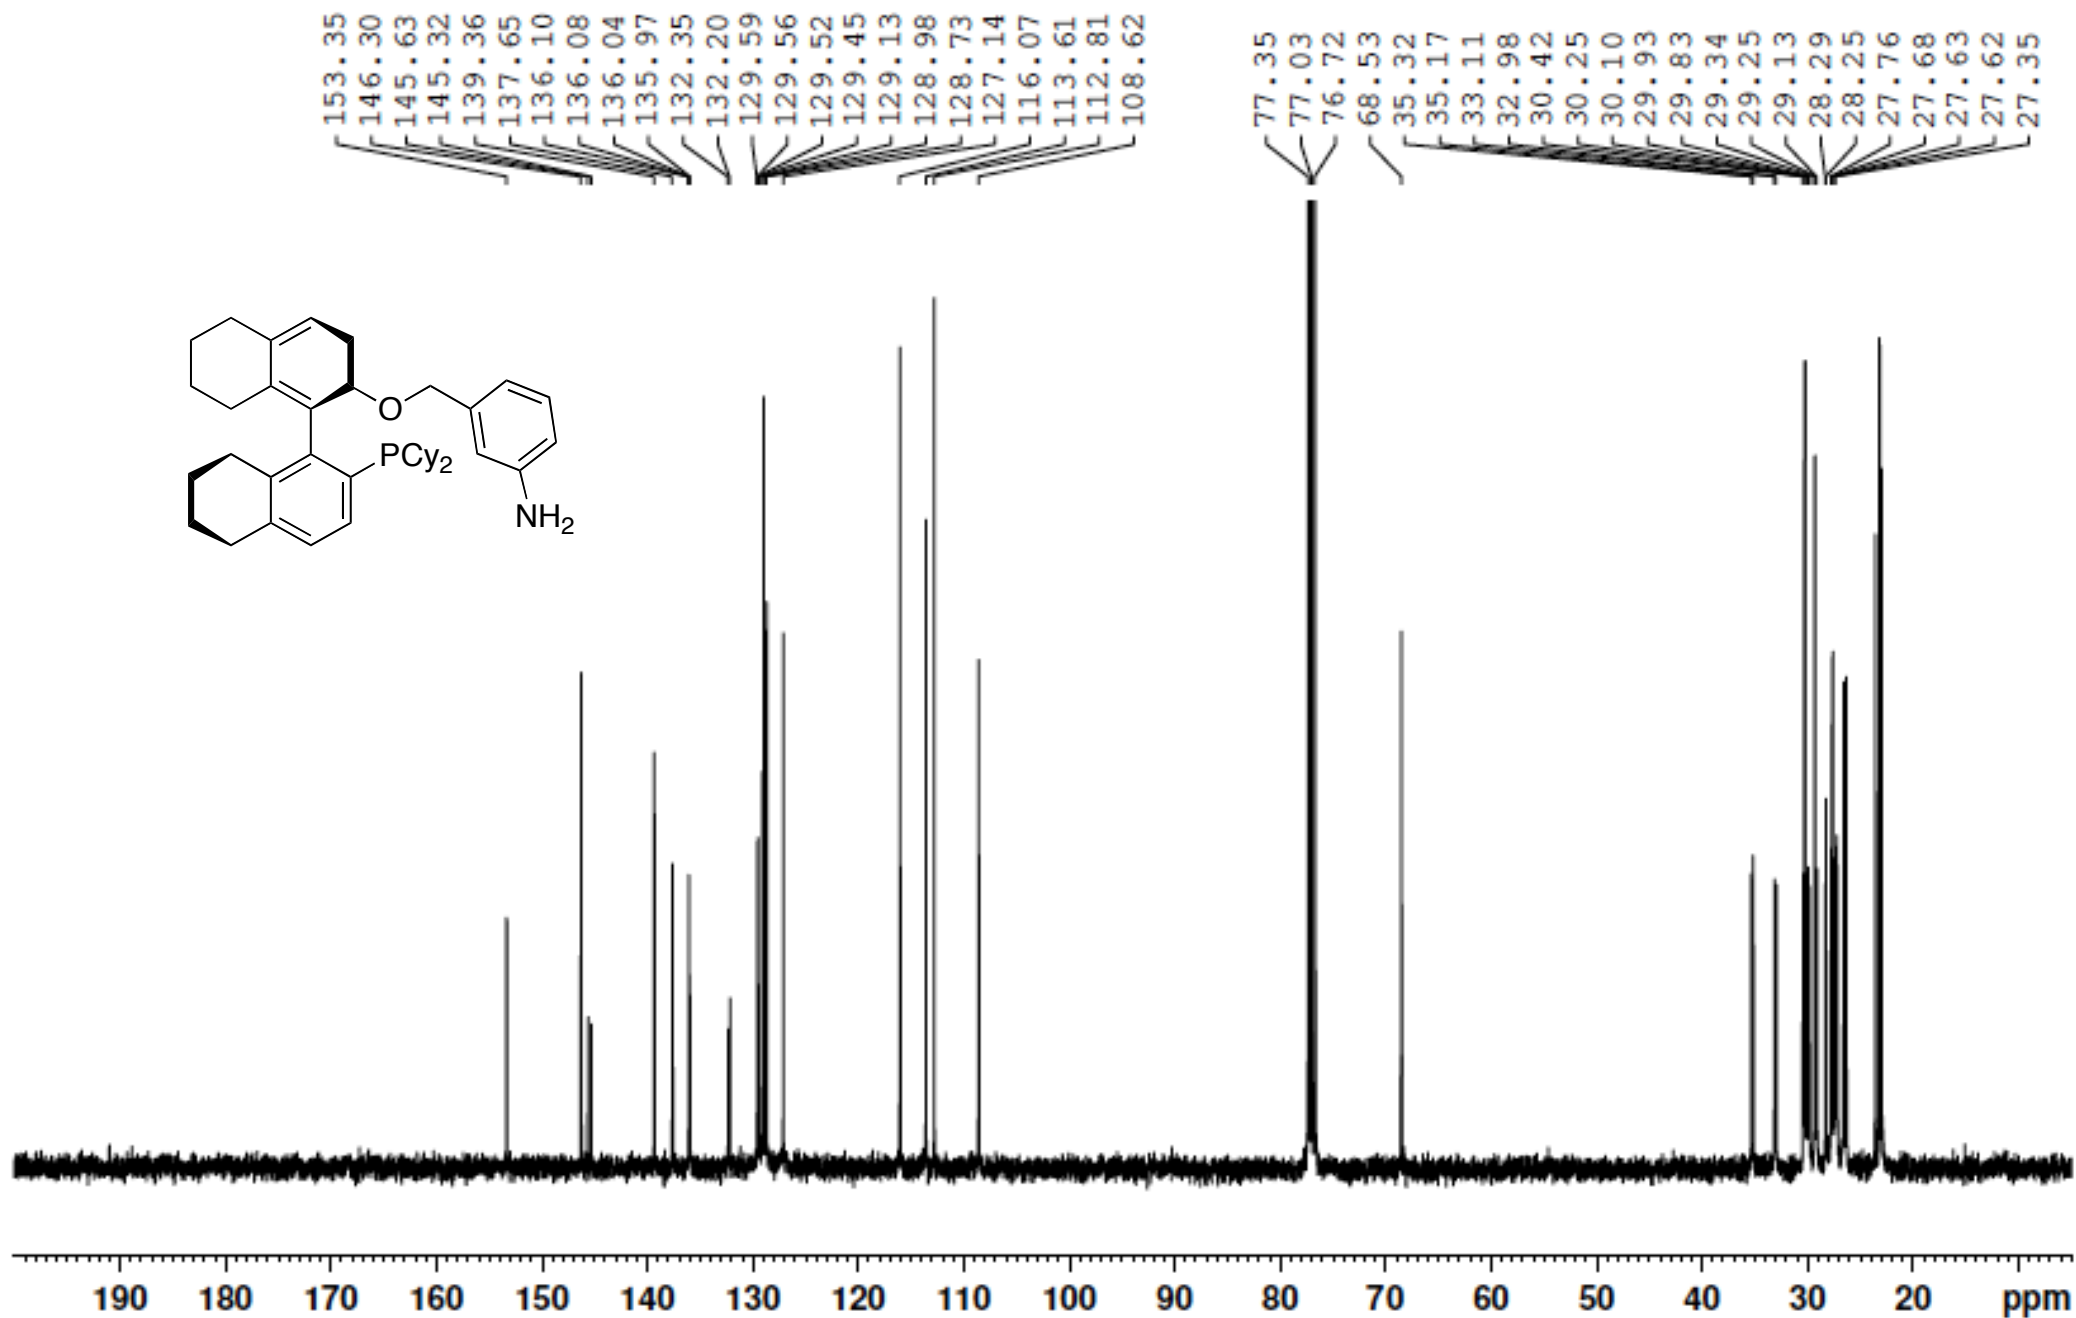

JF11-46-redo CDC13 1HNMR BBFO2

2013-08-05

7.692  
7.430  
7.261  
7.243  
7.218  
7.185  
7.178  
7.165  
7.158  
7.065  
7.045  
6.722  
6.701  
5.032  
2.886  
2.874  
2.847  
2.829  
2.767  
2.525  
2.215  
2.196  
2.178  
2.172  
2.058  
1.906  
1.826  
1.802  
1.789  
1.763  
1.746  
1.730  
1.714  
1.707  
1.700  
1.676  
1.668  
1.644  
1.554  
1.380  
1.255  
1.230  
1.209  
1.190  
1.161  
1.125  
1.093  
1.082  
1.061  
1.054  
1.045  
1.033  
1.023  
0.900  
0.880  
0.872  
0.650  
0.071  
0.000

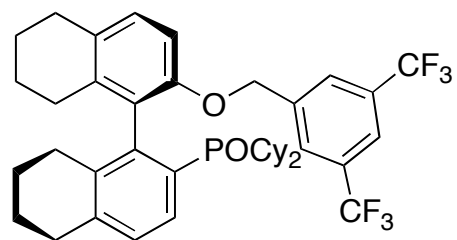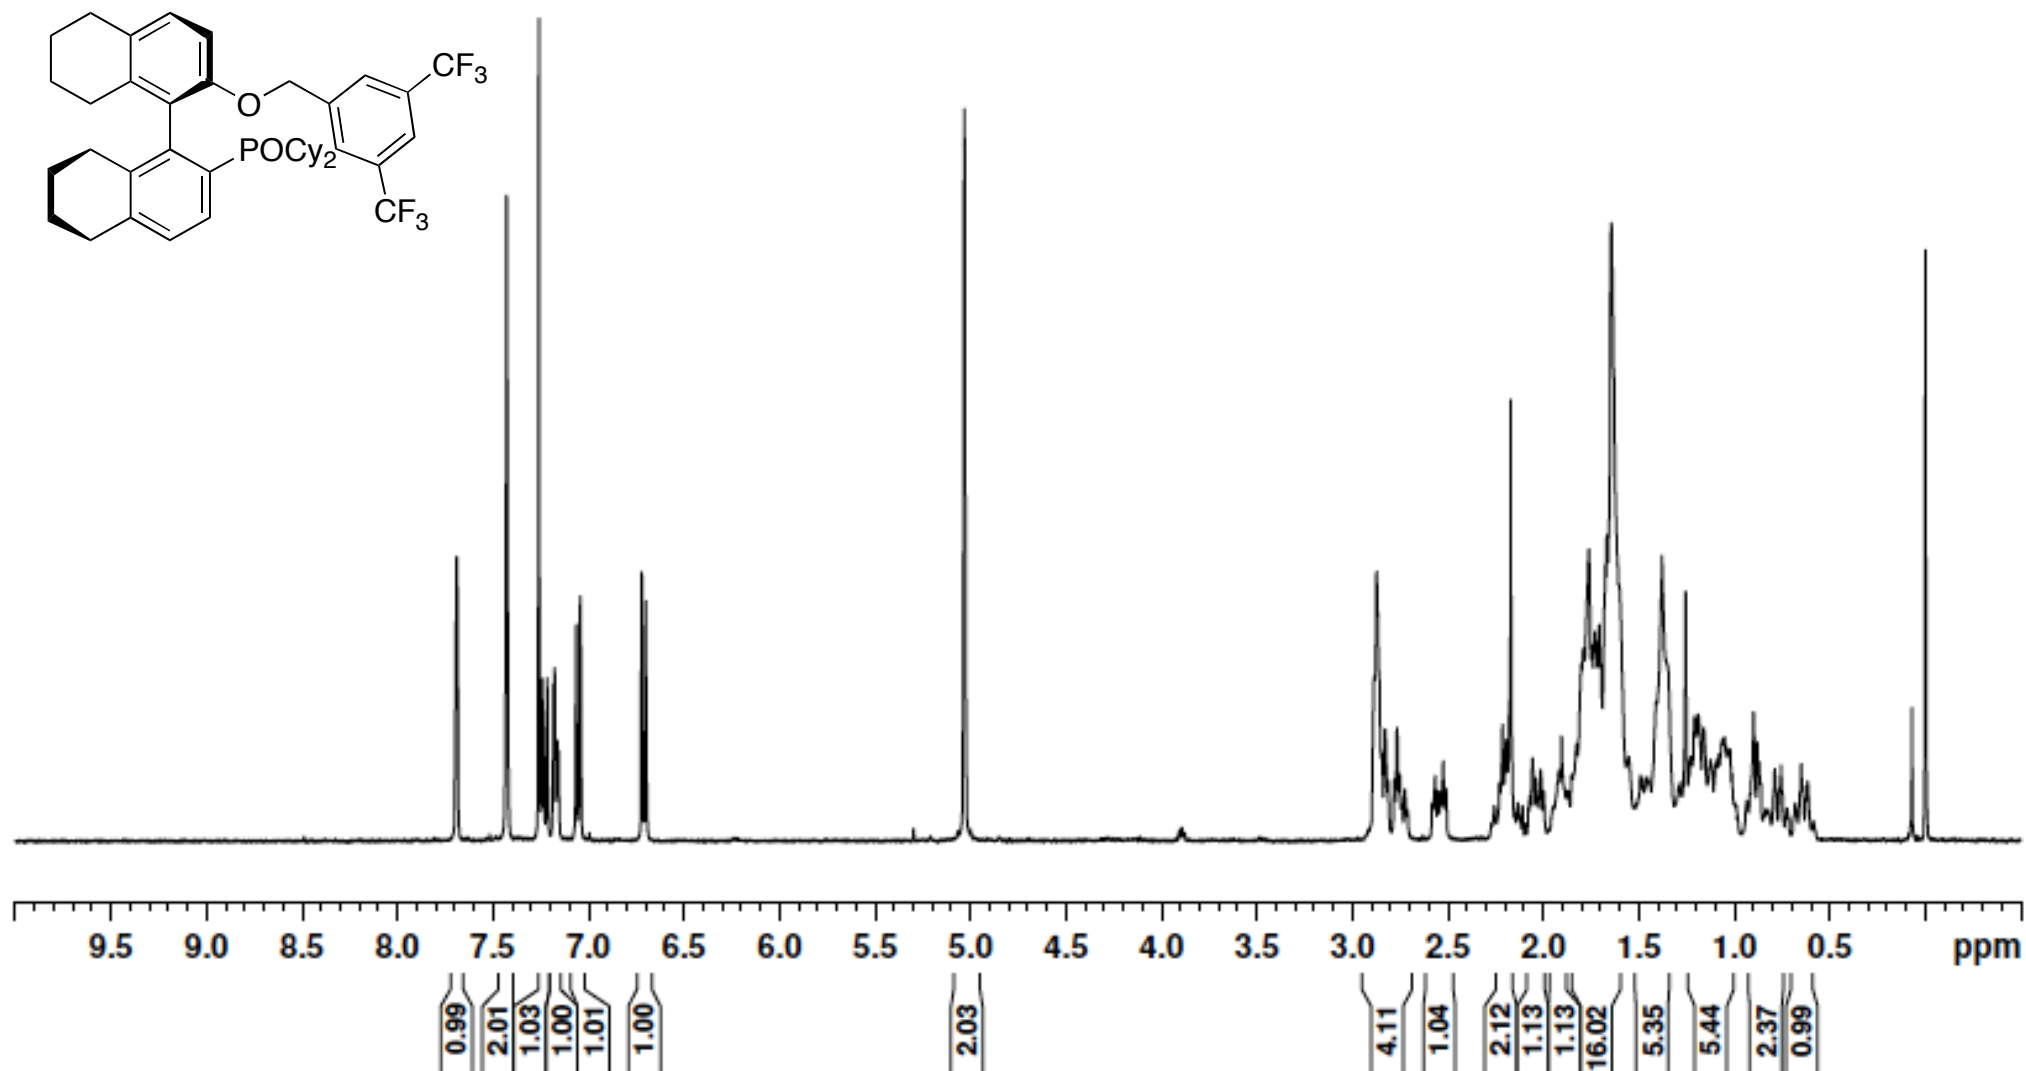

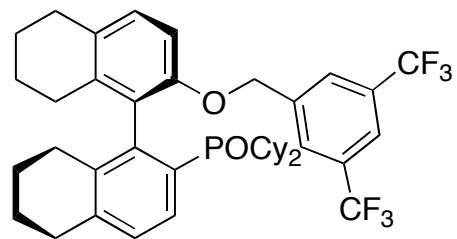

—45.03

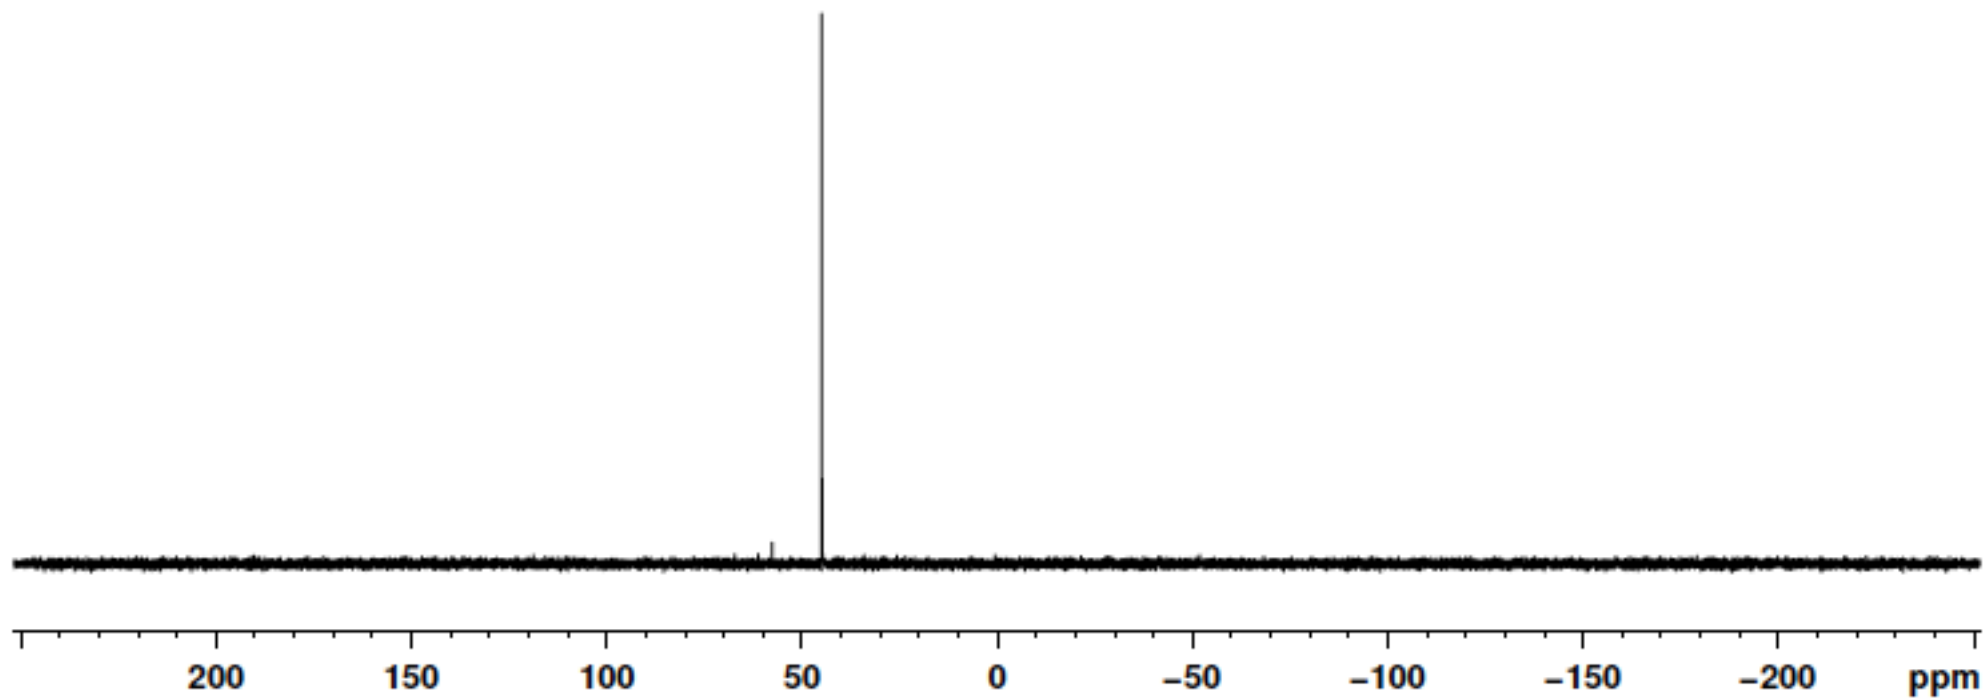

— -63.01

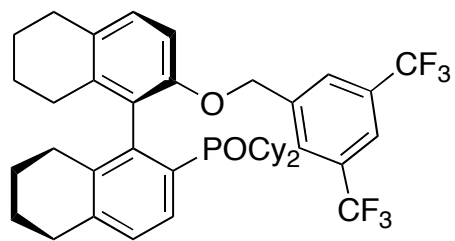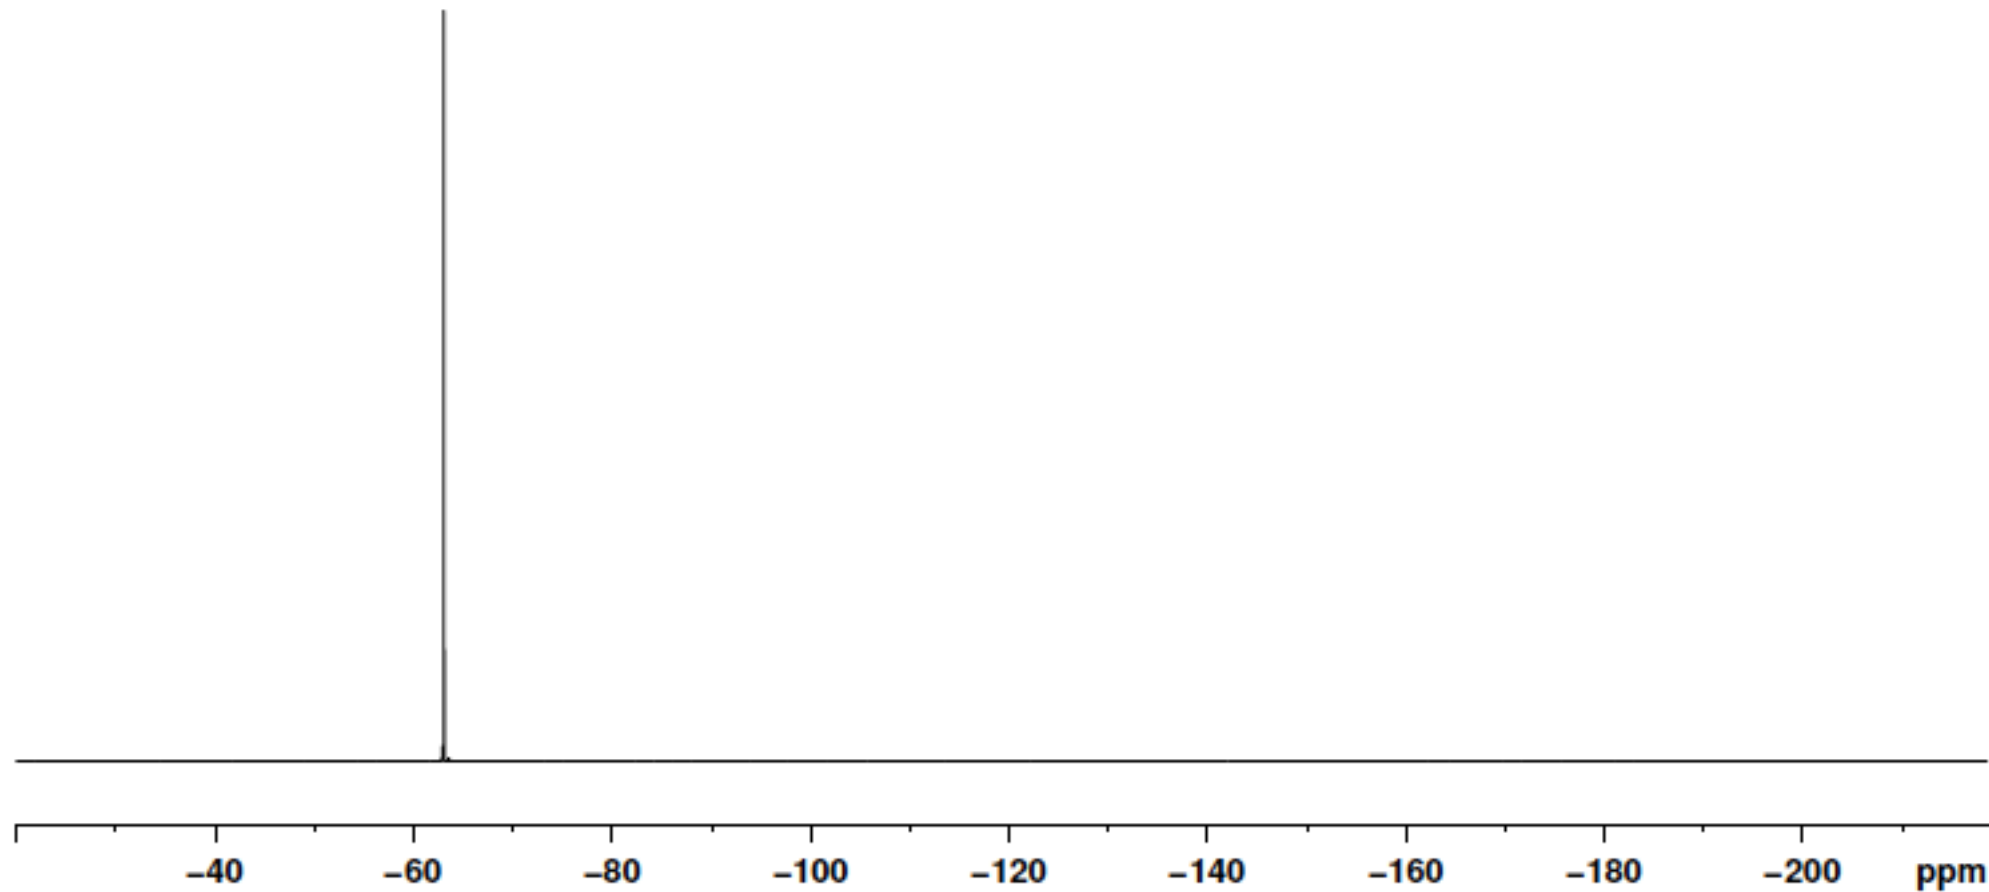



JF10-131 1H NMR, CDC13, BBFO1  
2013-07-22

7.696  
7.453  
7.337  
7.332  
7.317  
7.313  
7.254  
7.133  
7.113  
7.103  
7.082  
6.709  
6.688  
5.070  
5.037  
4.963  
4.930  
2.842  
2.826  
2.809  
2.784  
2.769  
2.251  
2.148  
2.071  
1.765  
1.748  
1.740  
1.732  
1.720  
1.682  
1.657  
1.644  
1.638  
1.629  
1.614  
1.591  
1.563  
1.477  
1.433  
1.410  
1.310  
1.286  
1.257  
1.237  
1.225  
1.214  
1.208  
1.191  
1.185  
1.153  
0.913  
0.879  
0.869  
0.846  
0.816  
0.775  
0.072  
0.000

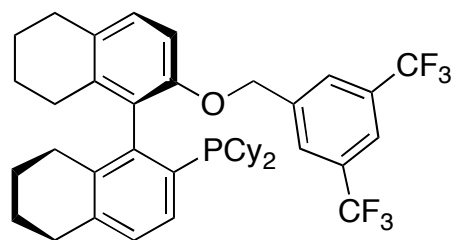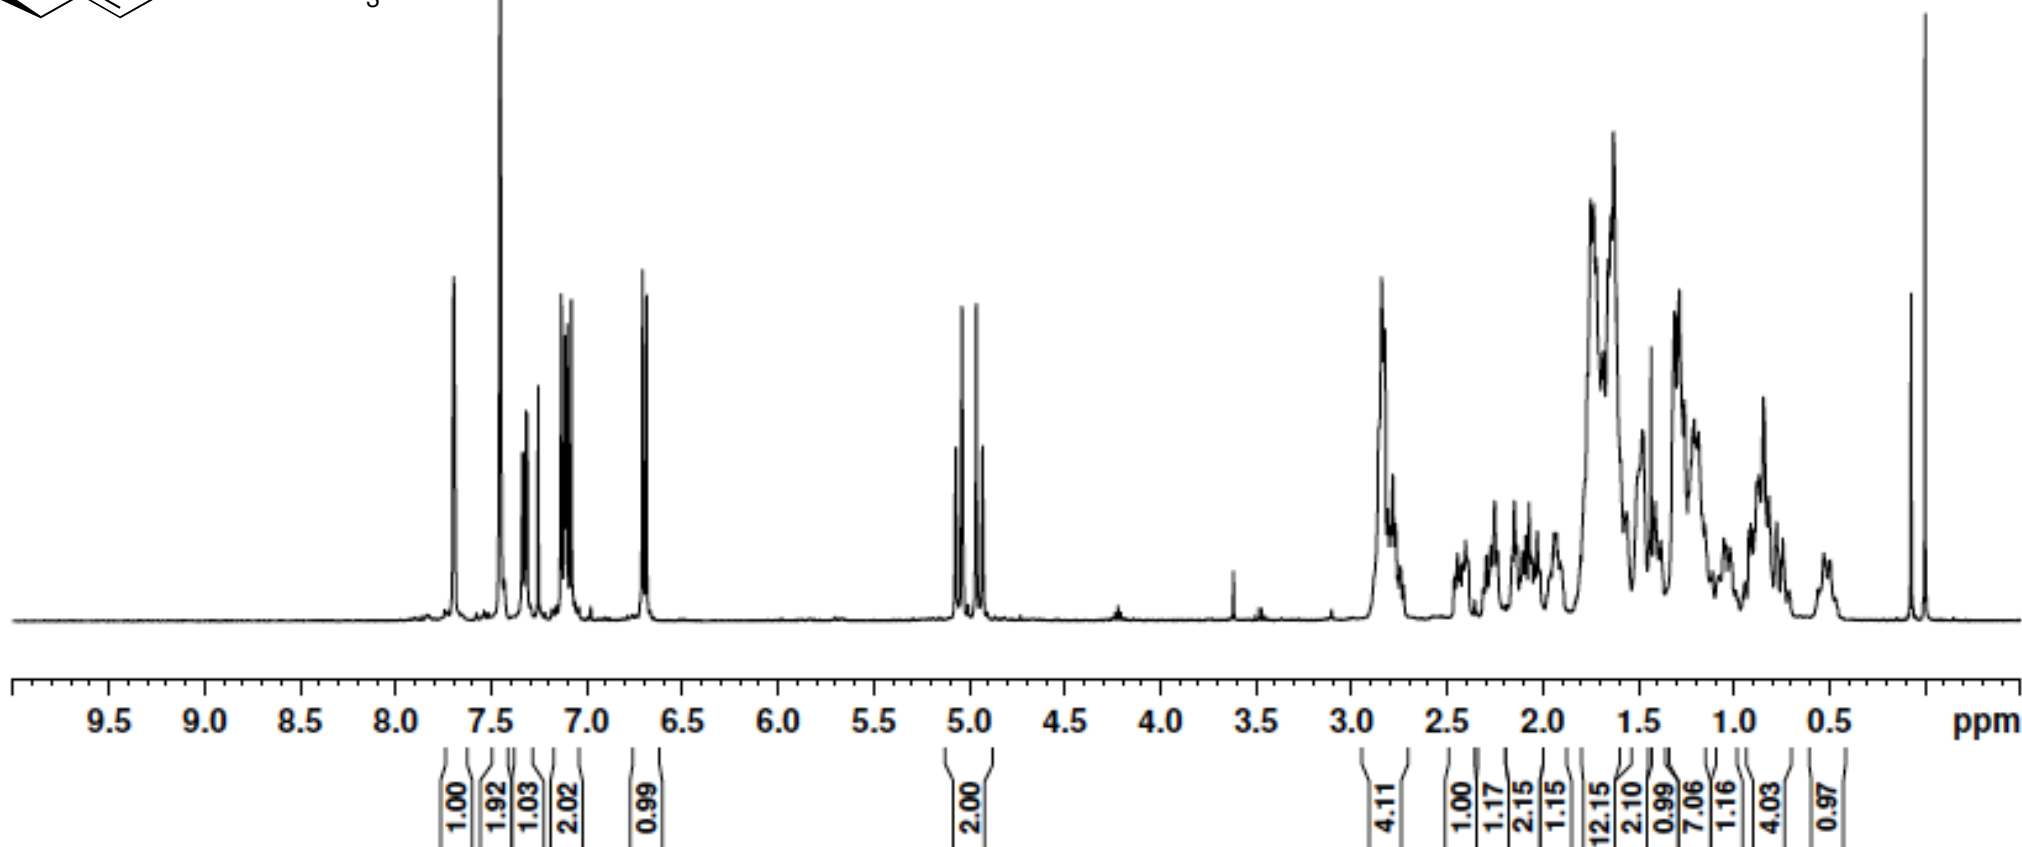

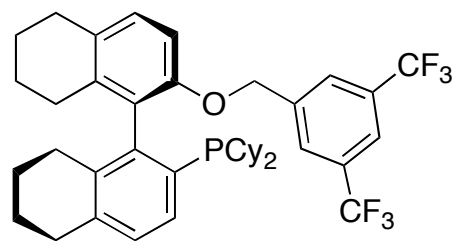

— -10.25

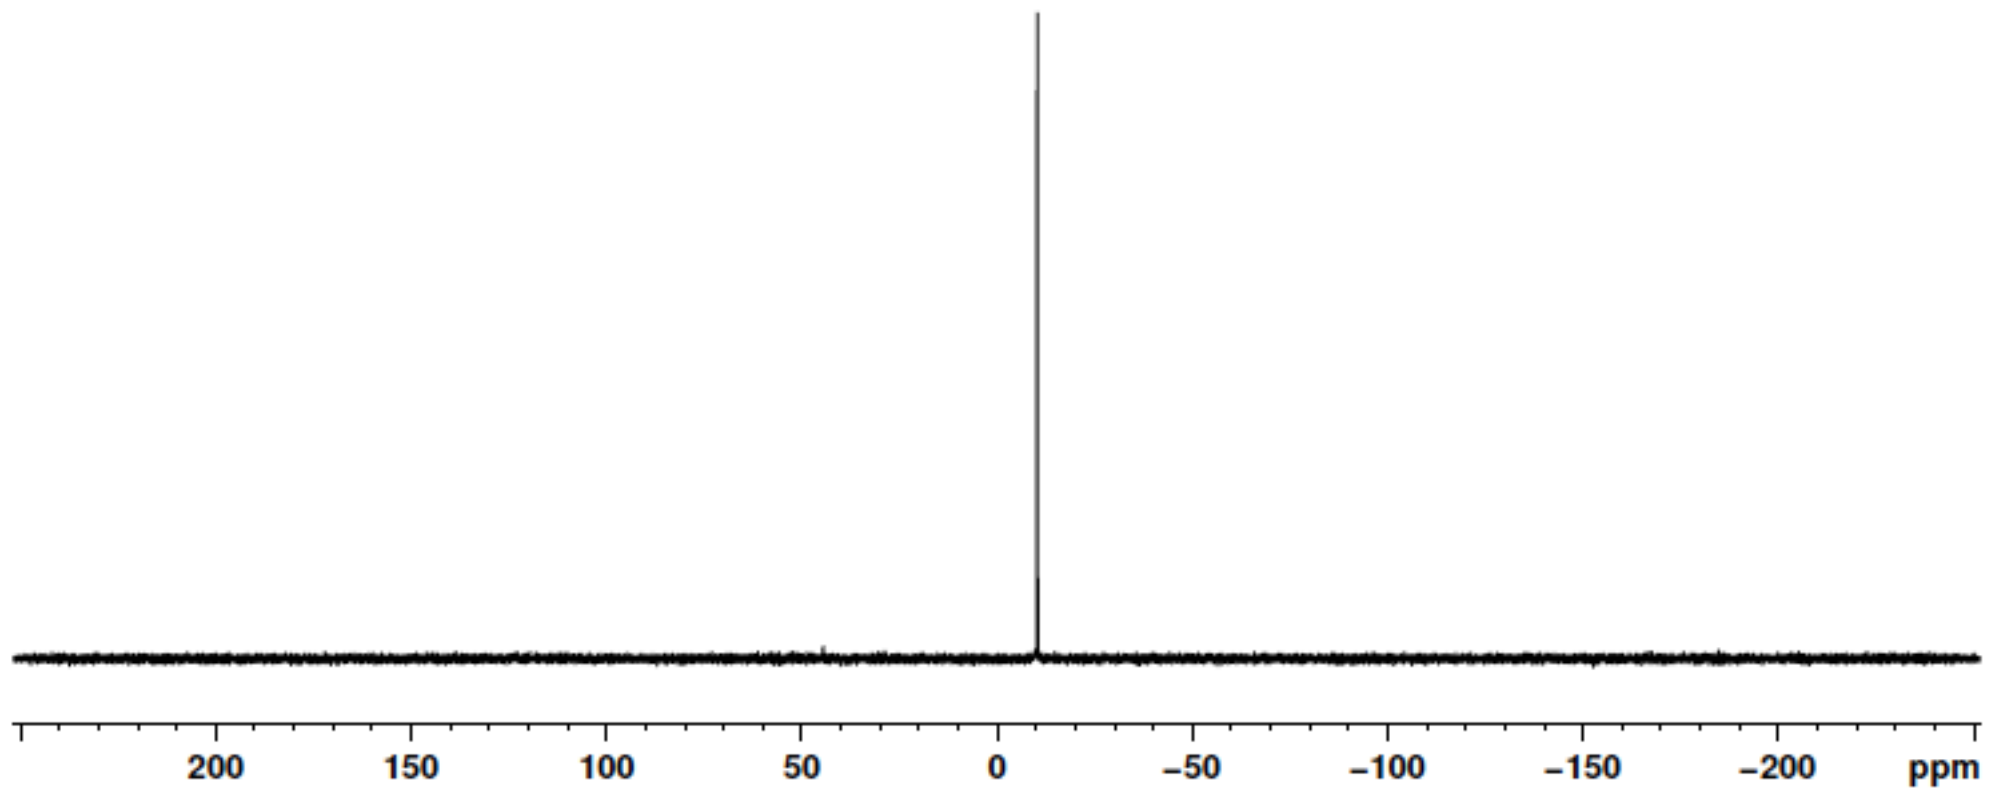

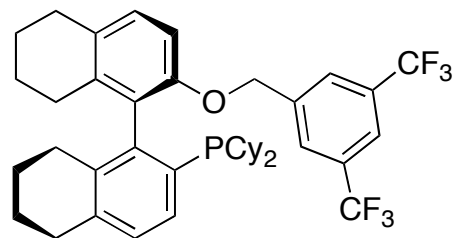

---63.03

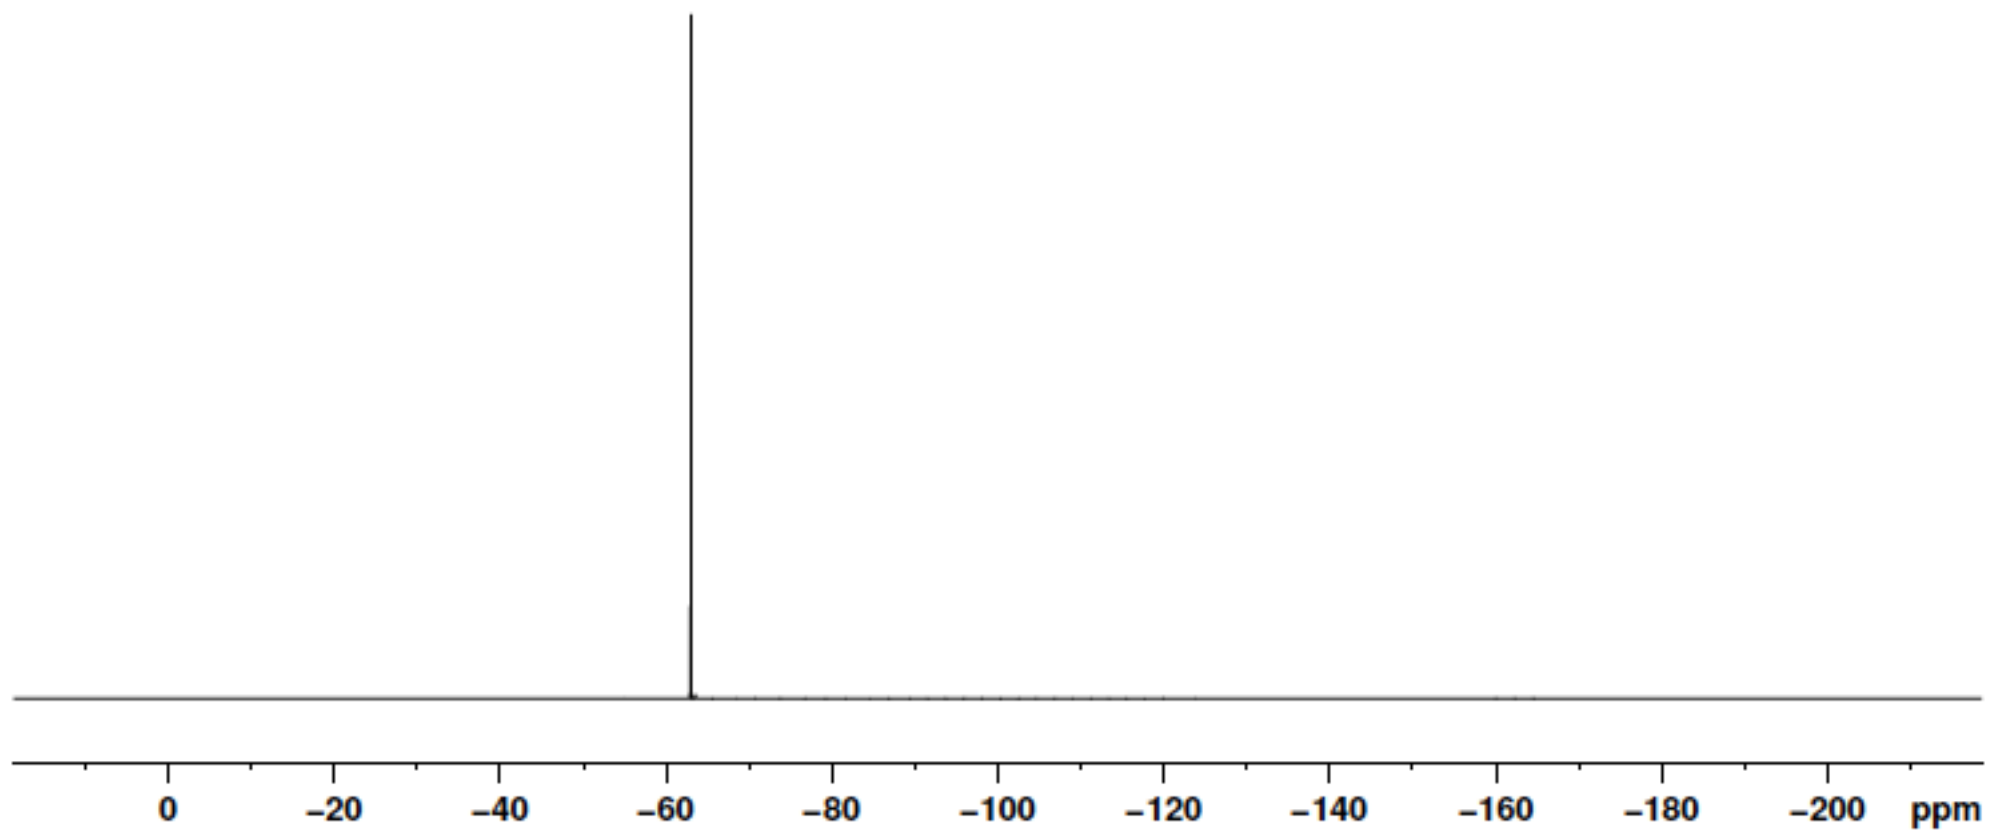

JF-L7 CNMR  
BBFO1  
2014-01-24

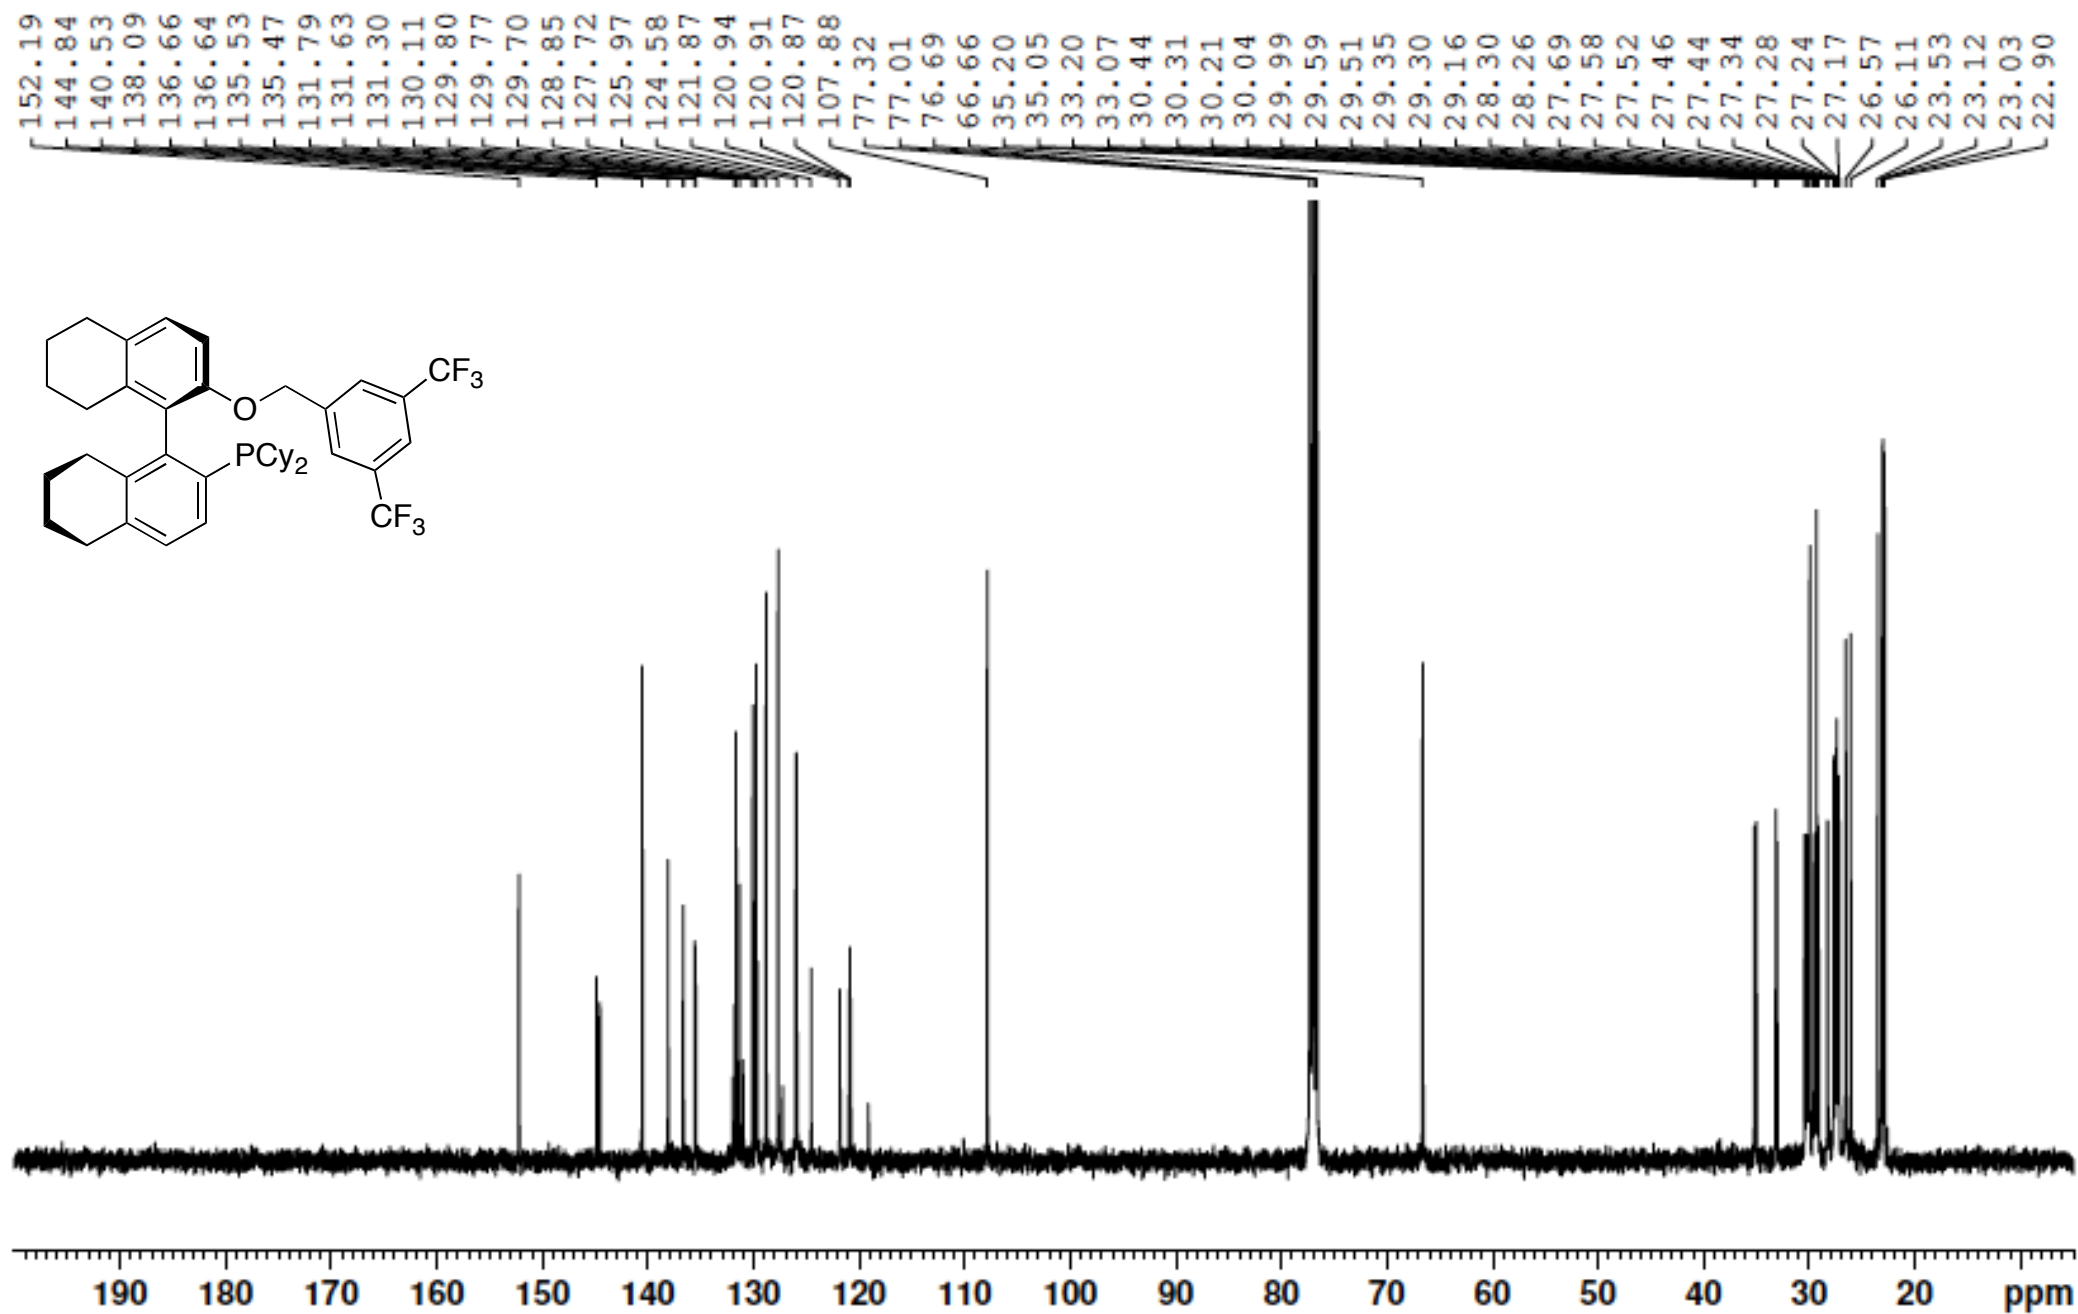

JF11-103 1HMR CDCl3  
AV400 2013-Oct-14

S21

7.438  
7.418  
7.412  
7.392  
7.260  
7.160  
7.154  
7.140  
7.134  
7.031  
7.010  
6.801  
6.737  
6.717  
6.638  
4.868  
2.890  
2.875  
2.860  
2.810  
2.752  
2.320  
2.244  
2.225  
2.202  
2.189  
2.173  
2.129  
1.841  
1.791  
1.775  
1.761  
1.746  
1.733  
1.720  
1.704  
1.694  
1.688  
1.673  
1.665  
1.658  
1.647  
1.642  
1.634  
1.583  
1.570  
1.518  
1.502  
1.494  
1.484  
1.465  
1.257  
1.214  
1.203  
1.182  
1.172  
0.903  
0.873  
0.003

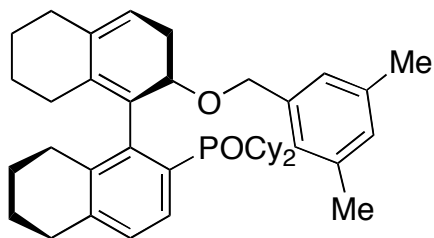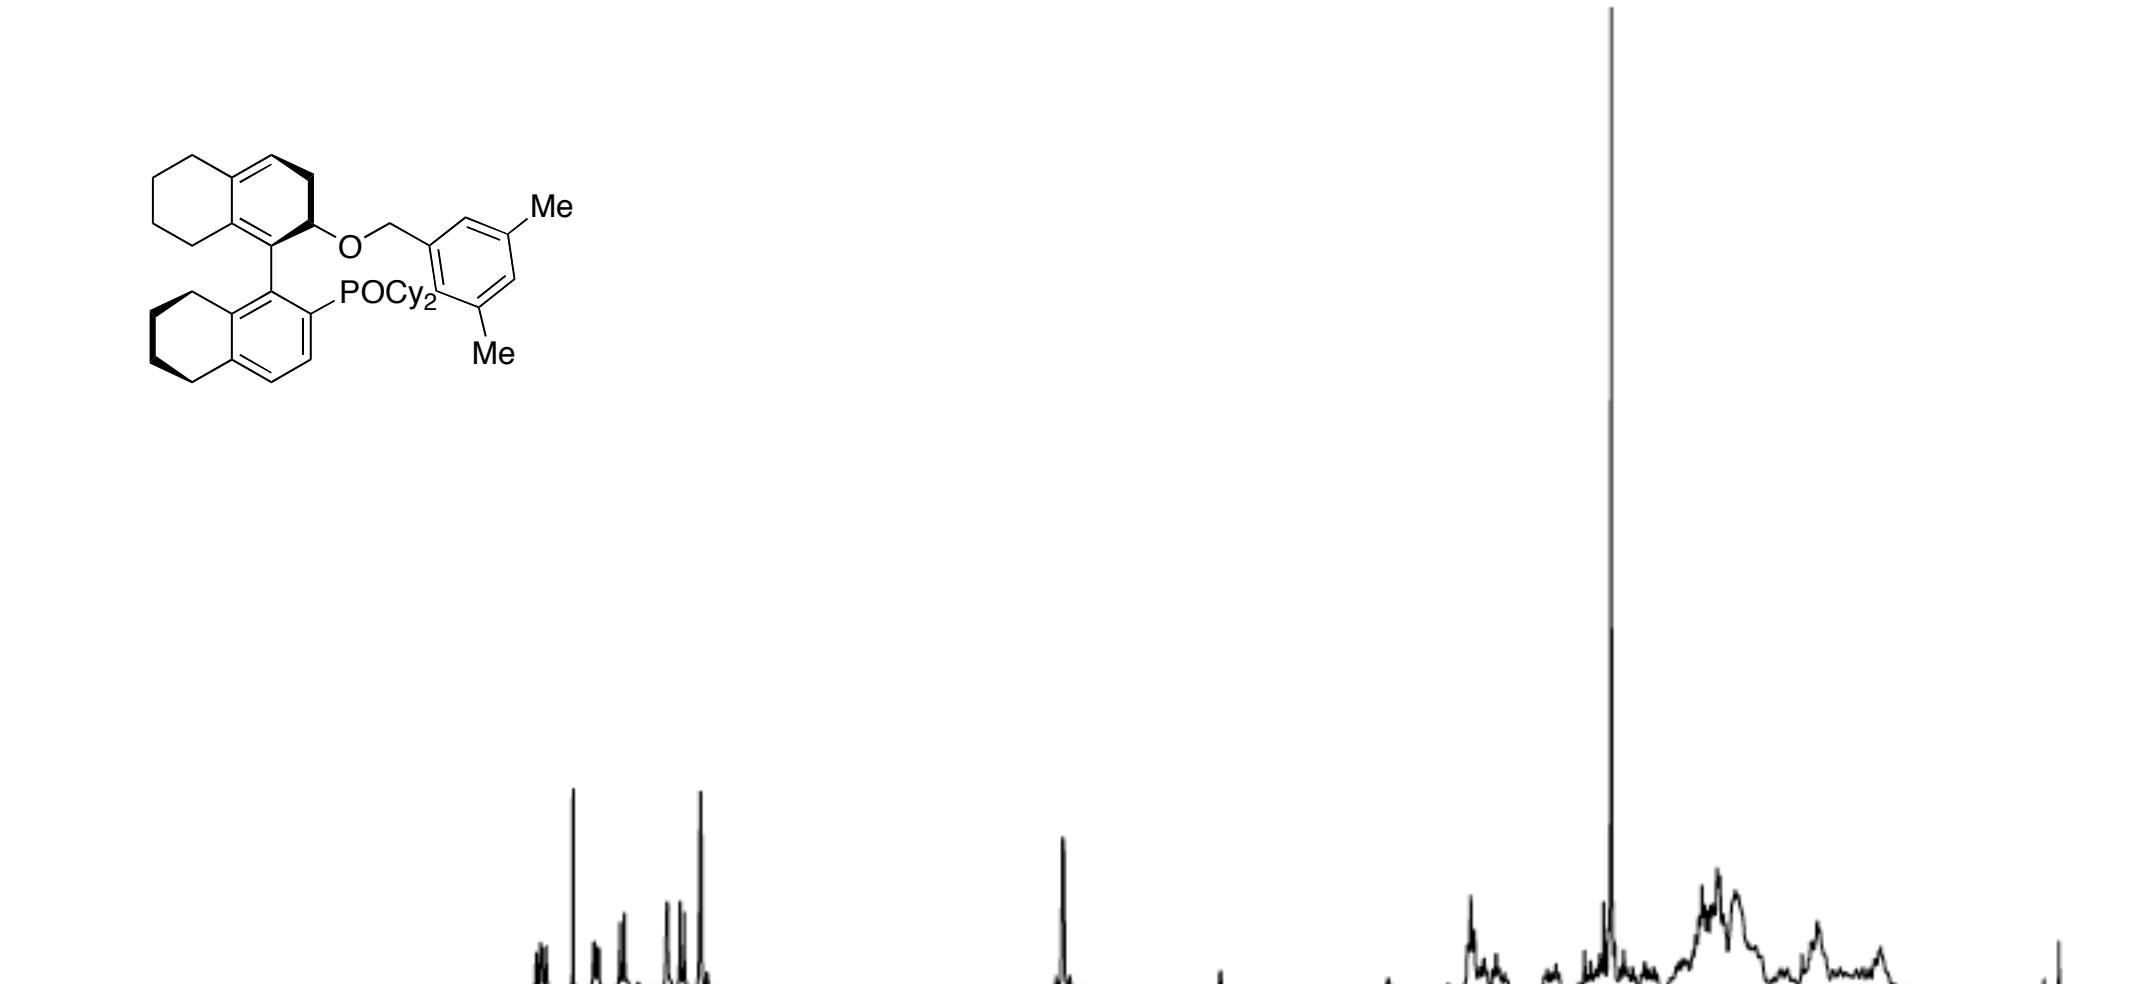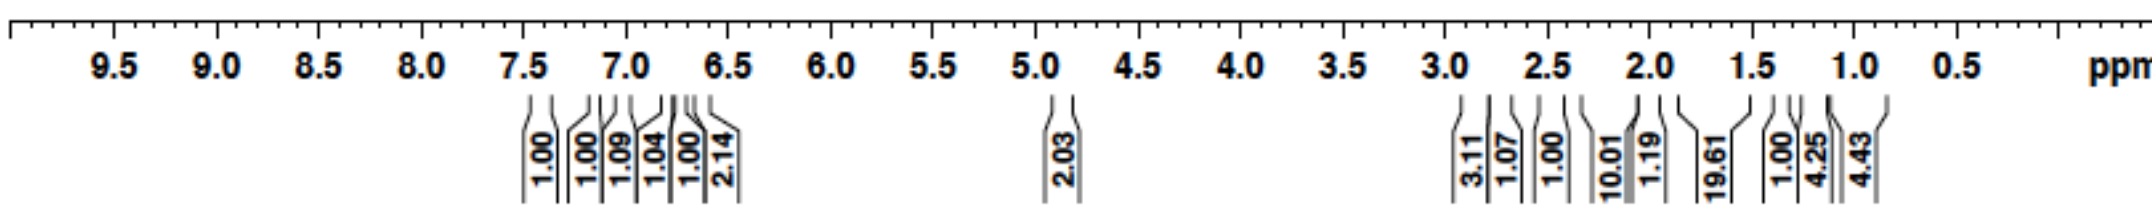

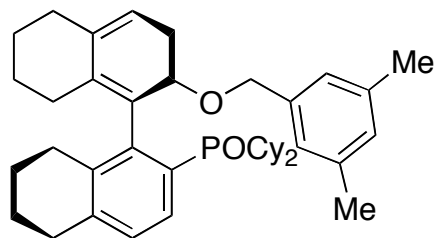

— 45.01

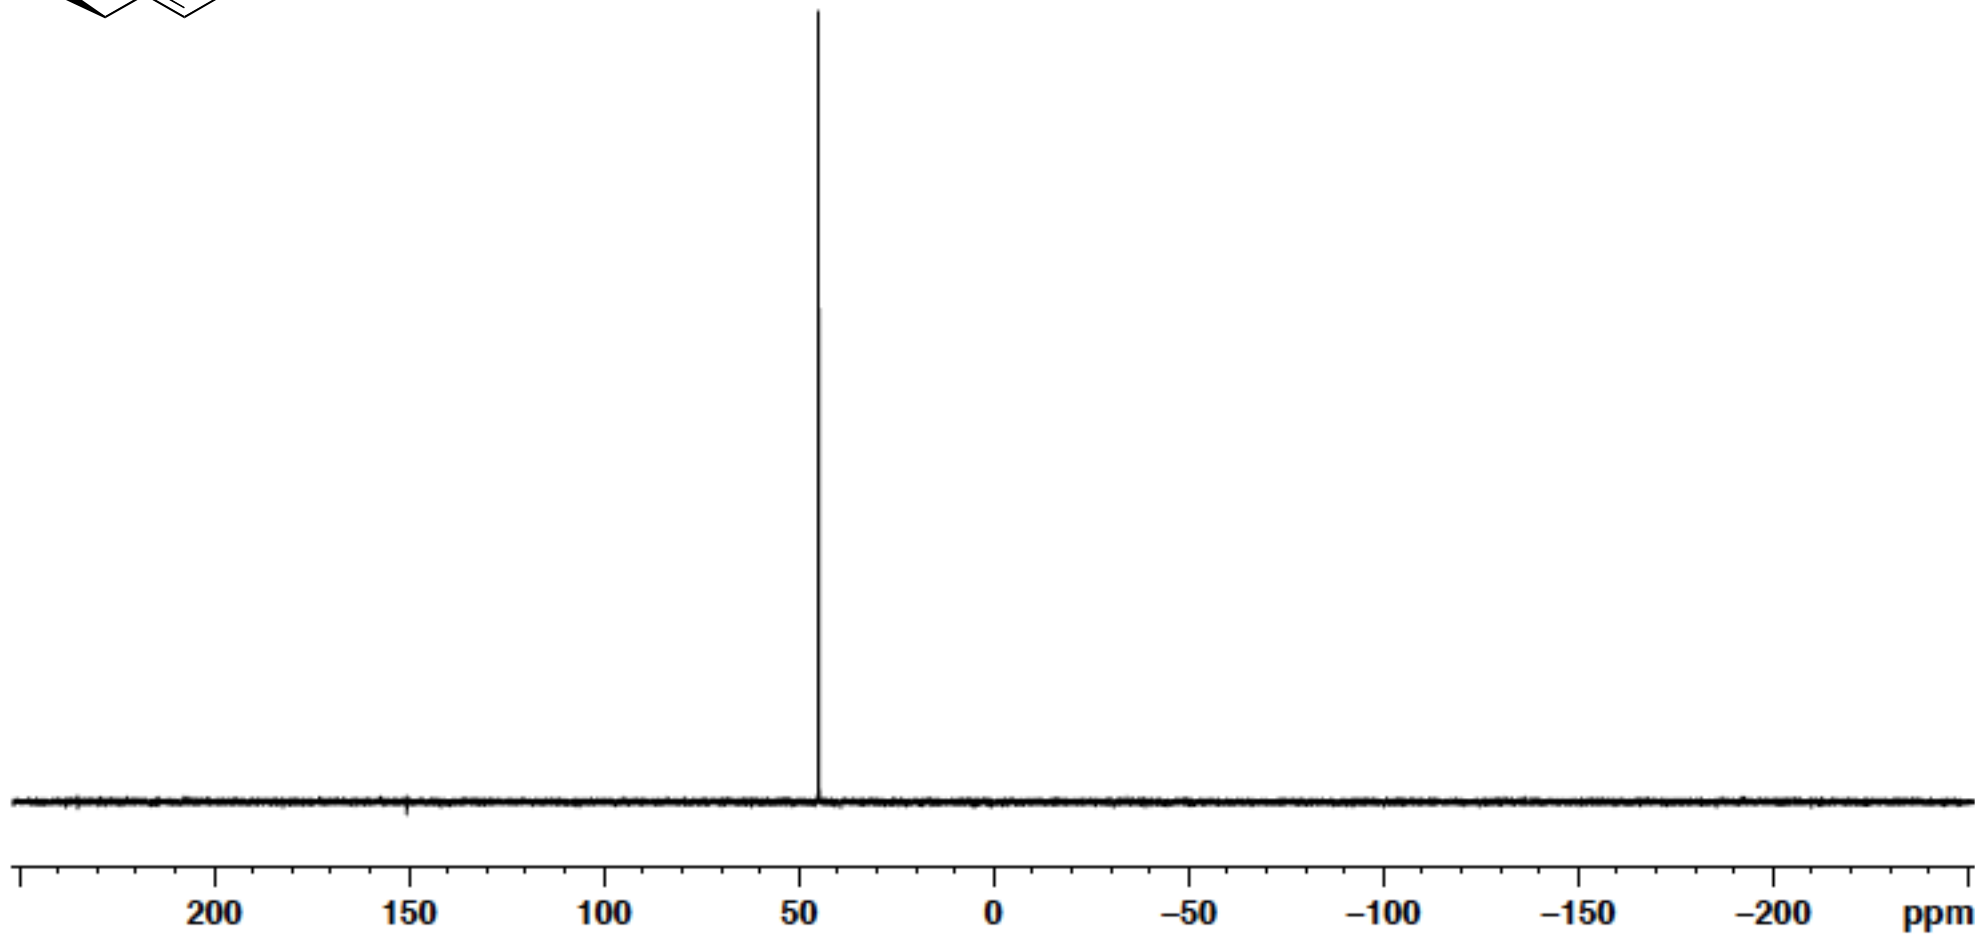

7.318  
7.314  
7.299  
7.295  
7.243  
7.084  
7.064  
7.041  
7.020  
6.799  
6.700  
6.678  
4.889  
4.858  
4.824  
4.793  
2.852  
2.837  
2.822  
2.798  
2.751  
2.367  
2.352  
2.342  
2.324  
2.195  
2.118  
1.977  
1.748  
1.723  
1.711  
1.698  
1.691  
1.683  
1.672  
1.666  
1.656  
1.619  
1.598  
1.582  
1.558  
1.470  
1.442  
1.409  
1.268  
1.255  
1.241  
1.213  
1.188  
1.112  
1.058  
1.037  
1.027  
0.981  
0.951  
0.927  
0.922  
0.916  
0.884

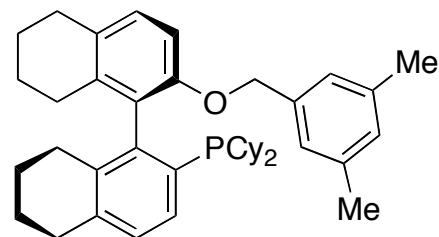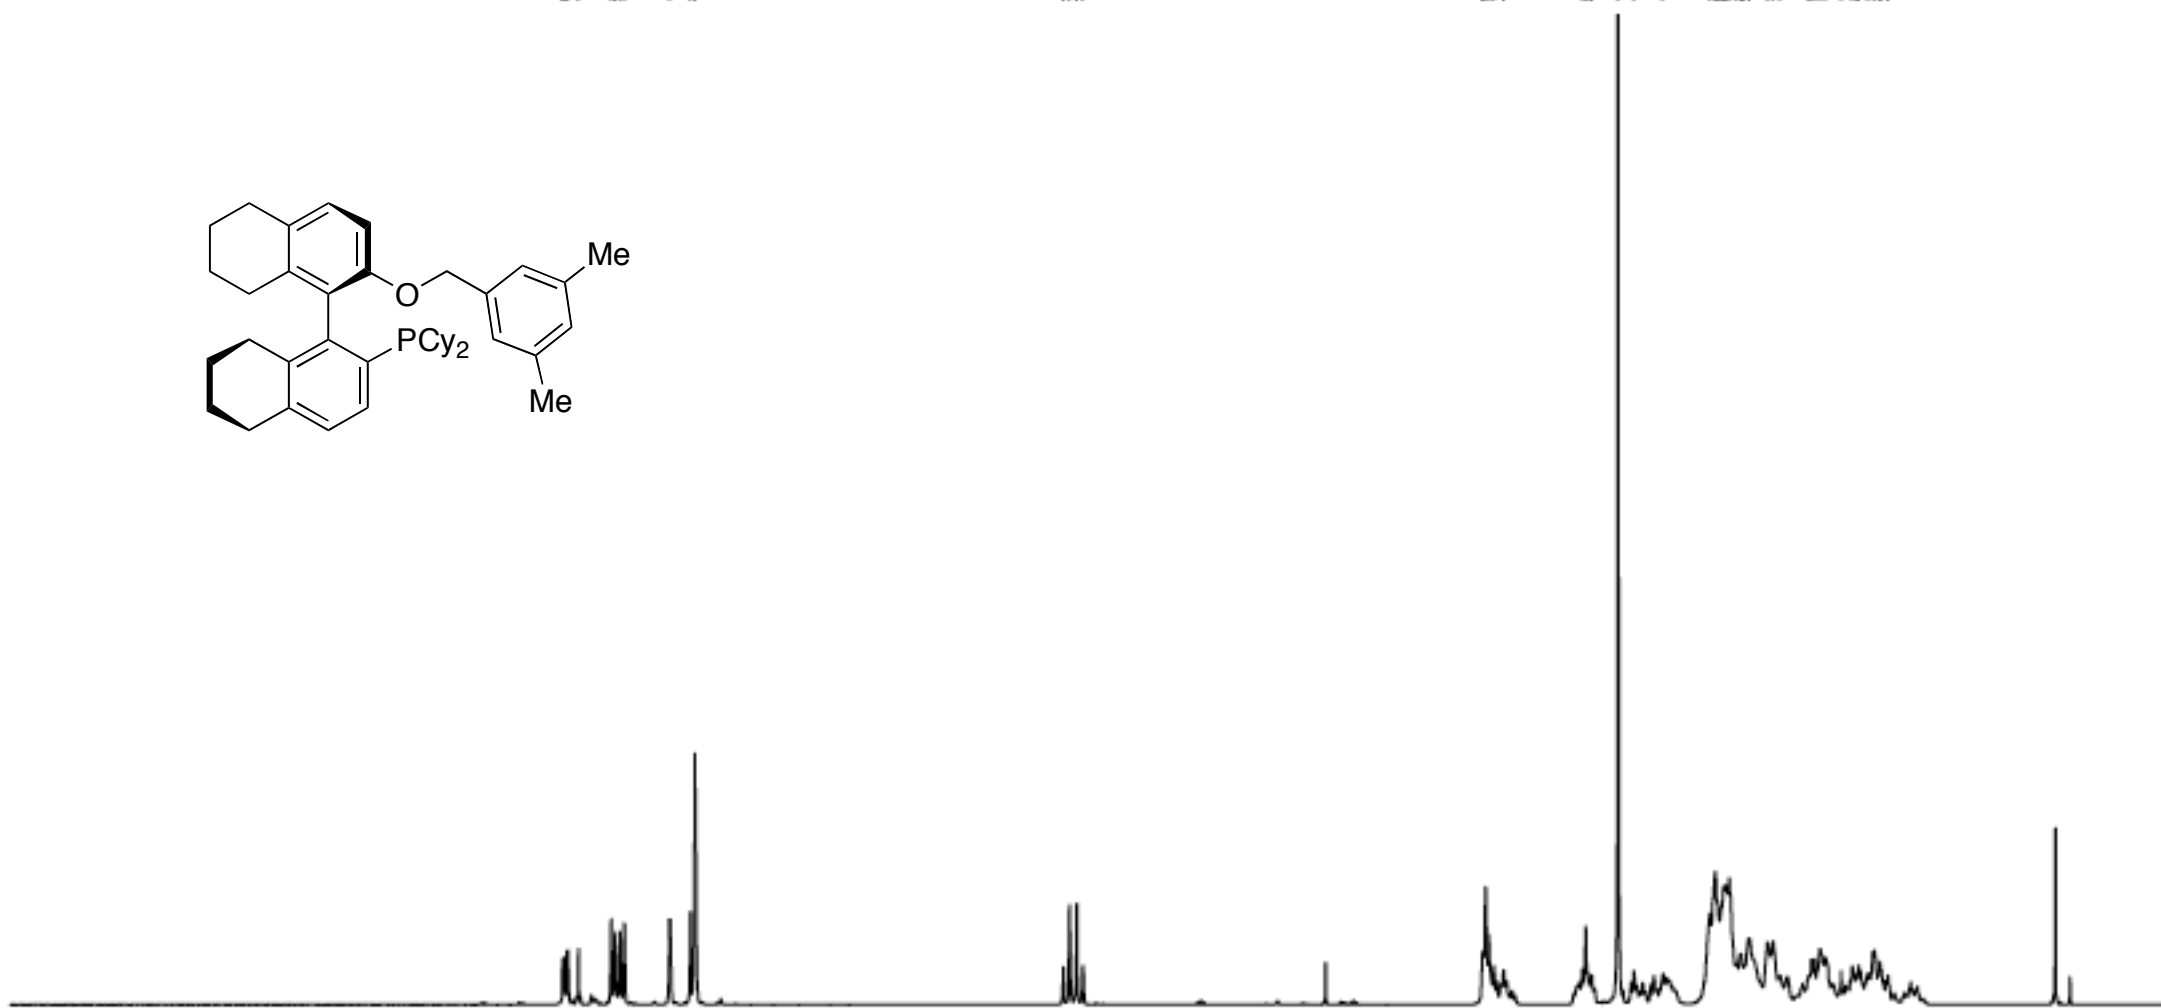

9.5 9.0 8.5 8.0 7.5 7.0 6.5 6.0 5.5 5.0 4.5 4.0 3.5 3.0 2.5 2.0 1.5 1.0 0.5 ppm

1.01  
2.00  
0.90  
2.80  
1.92  
4.13  
2.21  
5.85  
1.14  
2.08  
19.53  
4.38  
5.11  
0.98

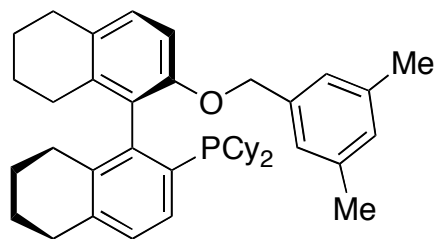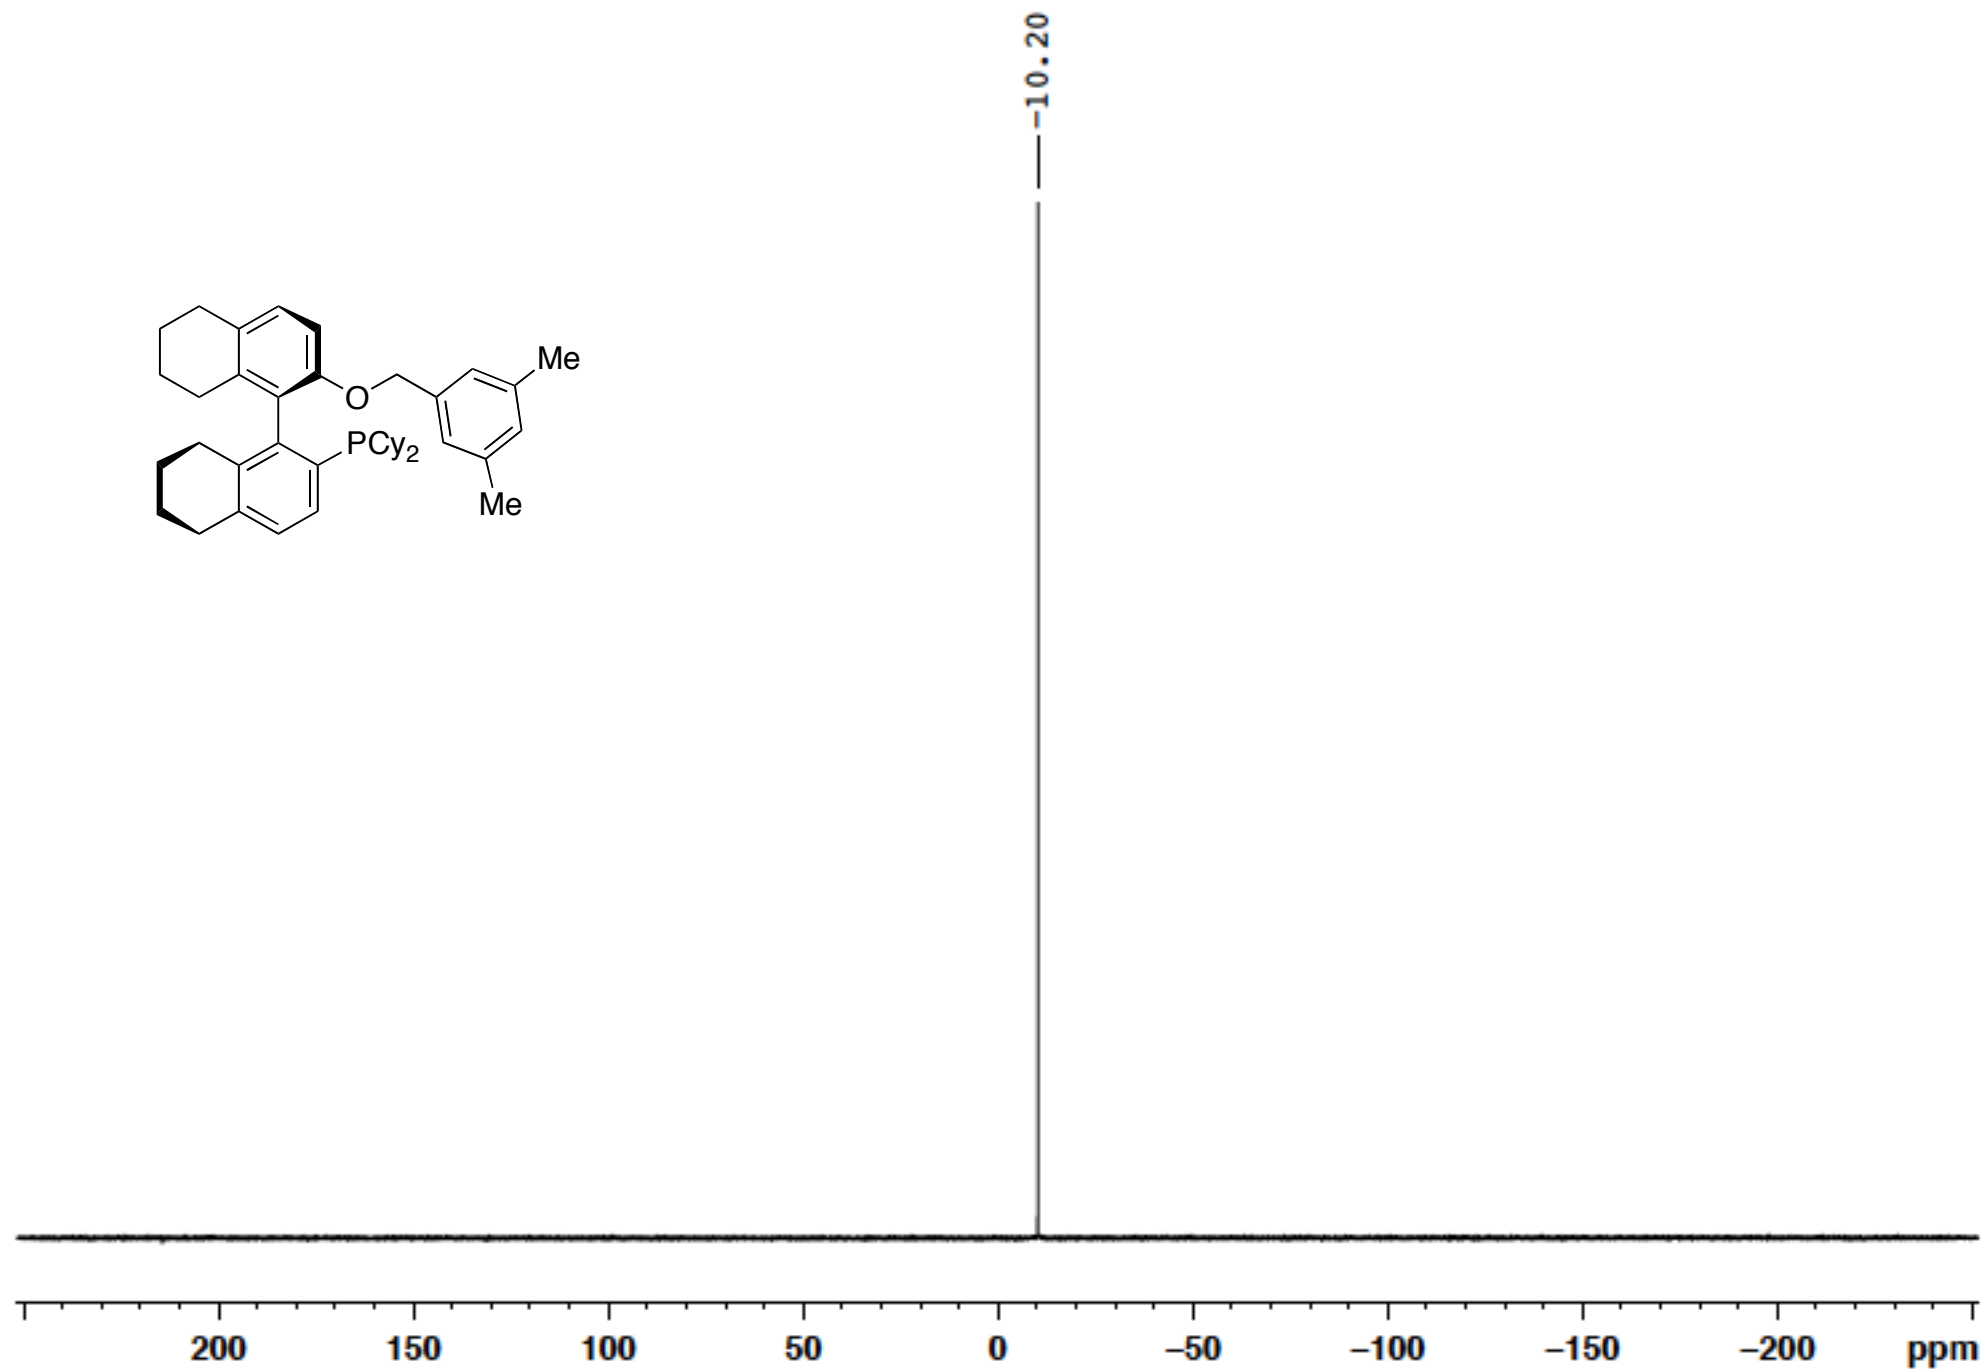



JF-L8 CNMR  
BBFO1 400M  
2014-01-25

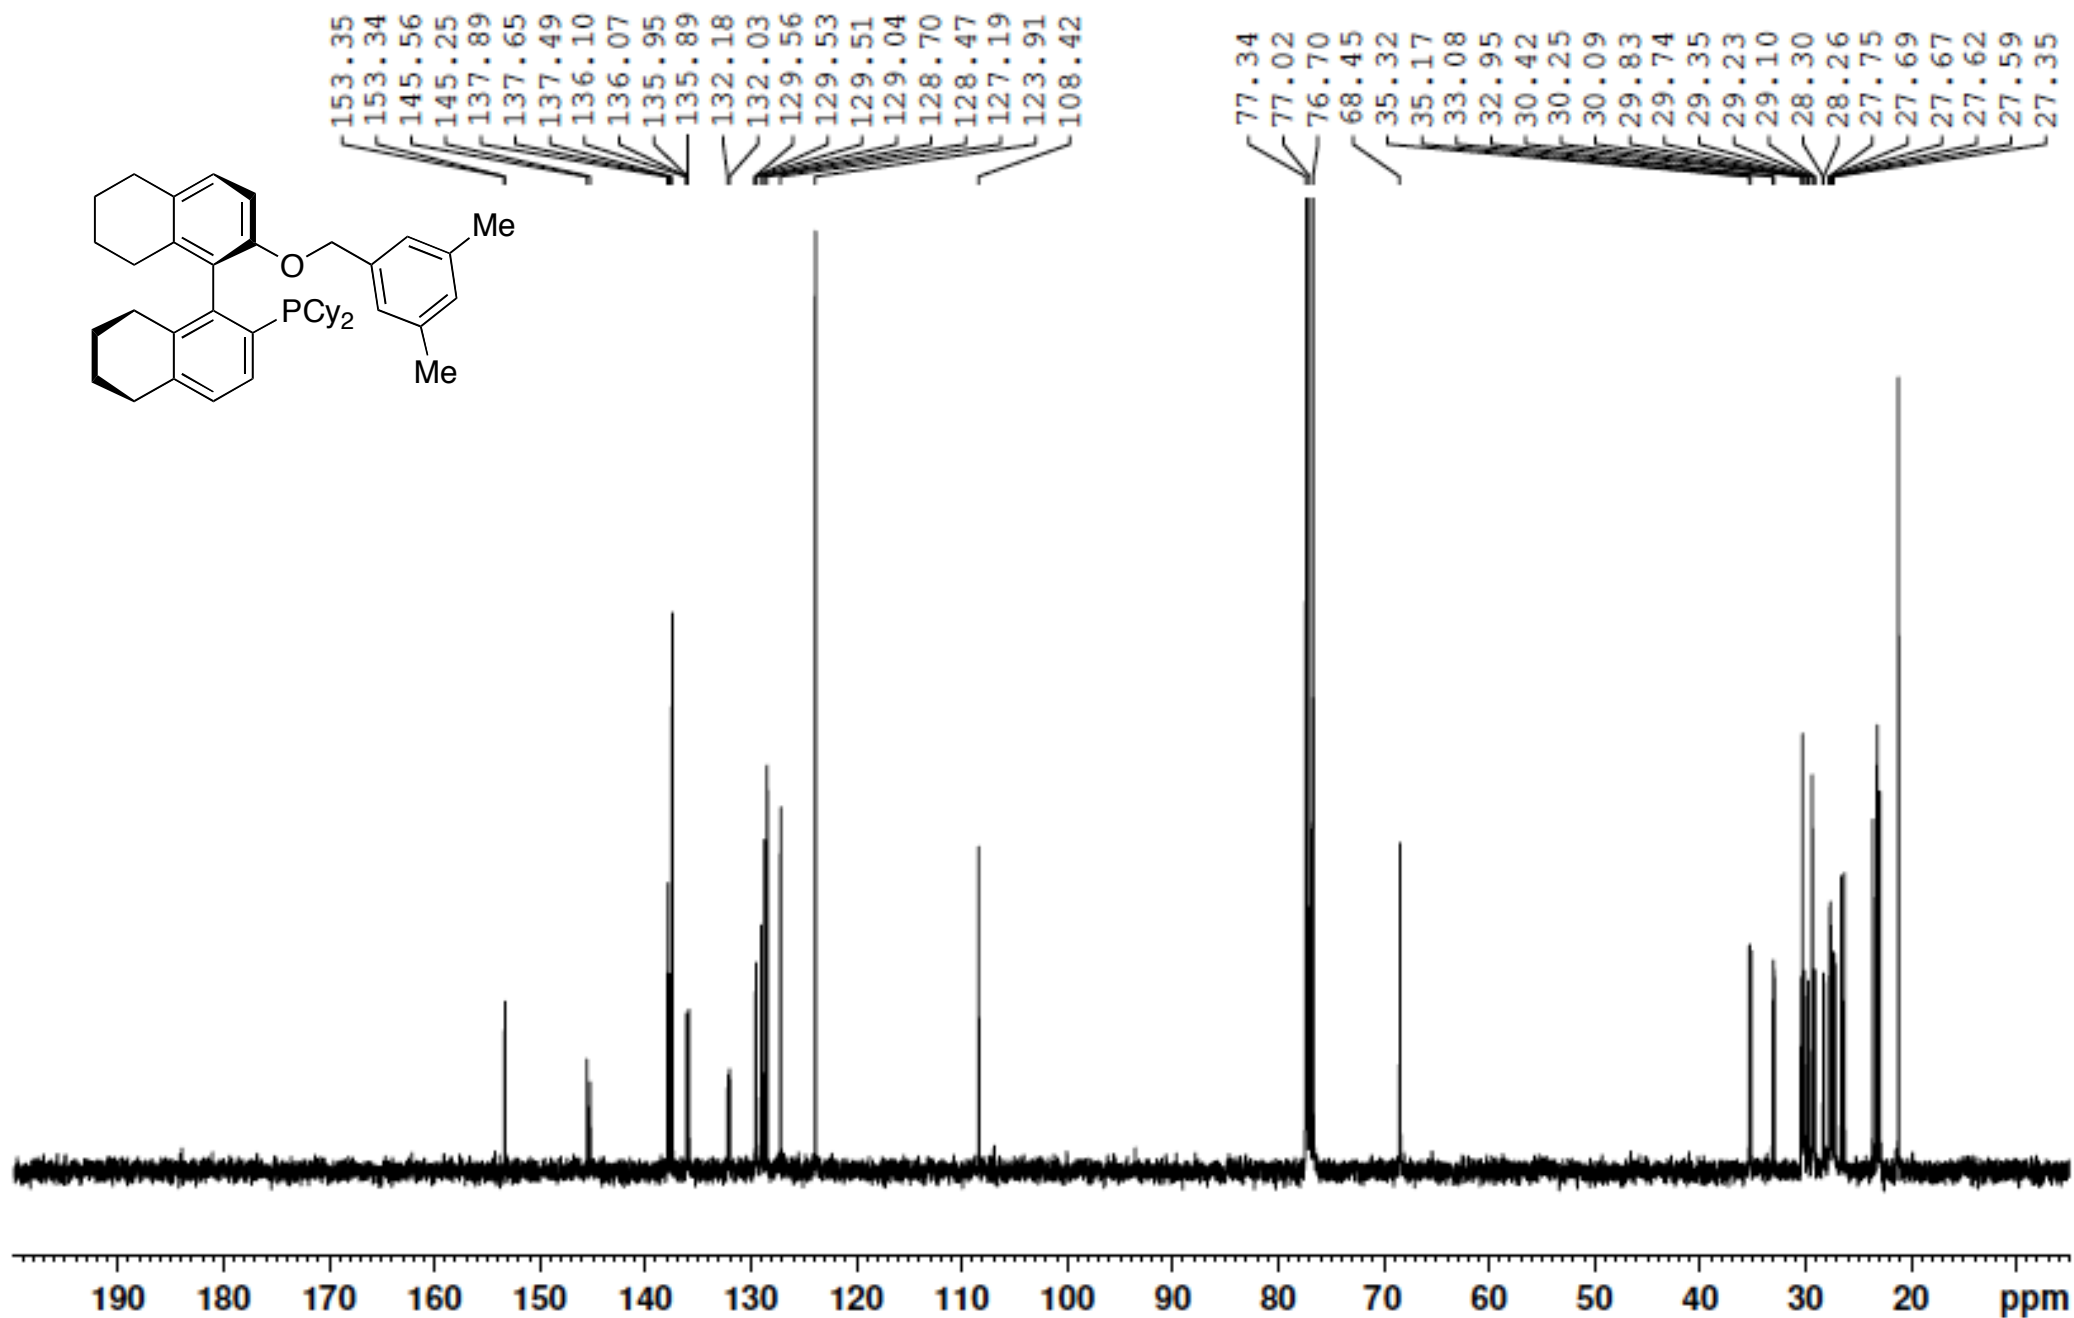

JF11-56-3, <sup>1</sup>HNMR, CDC13 BBFO2

2013-07-27

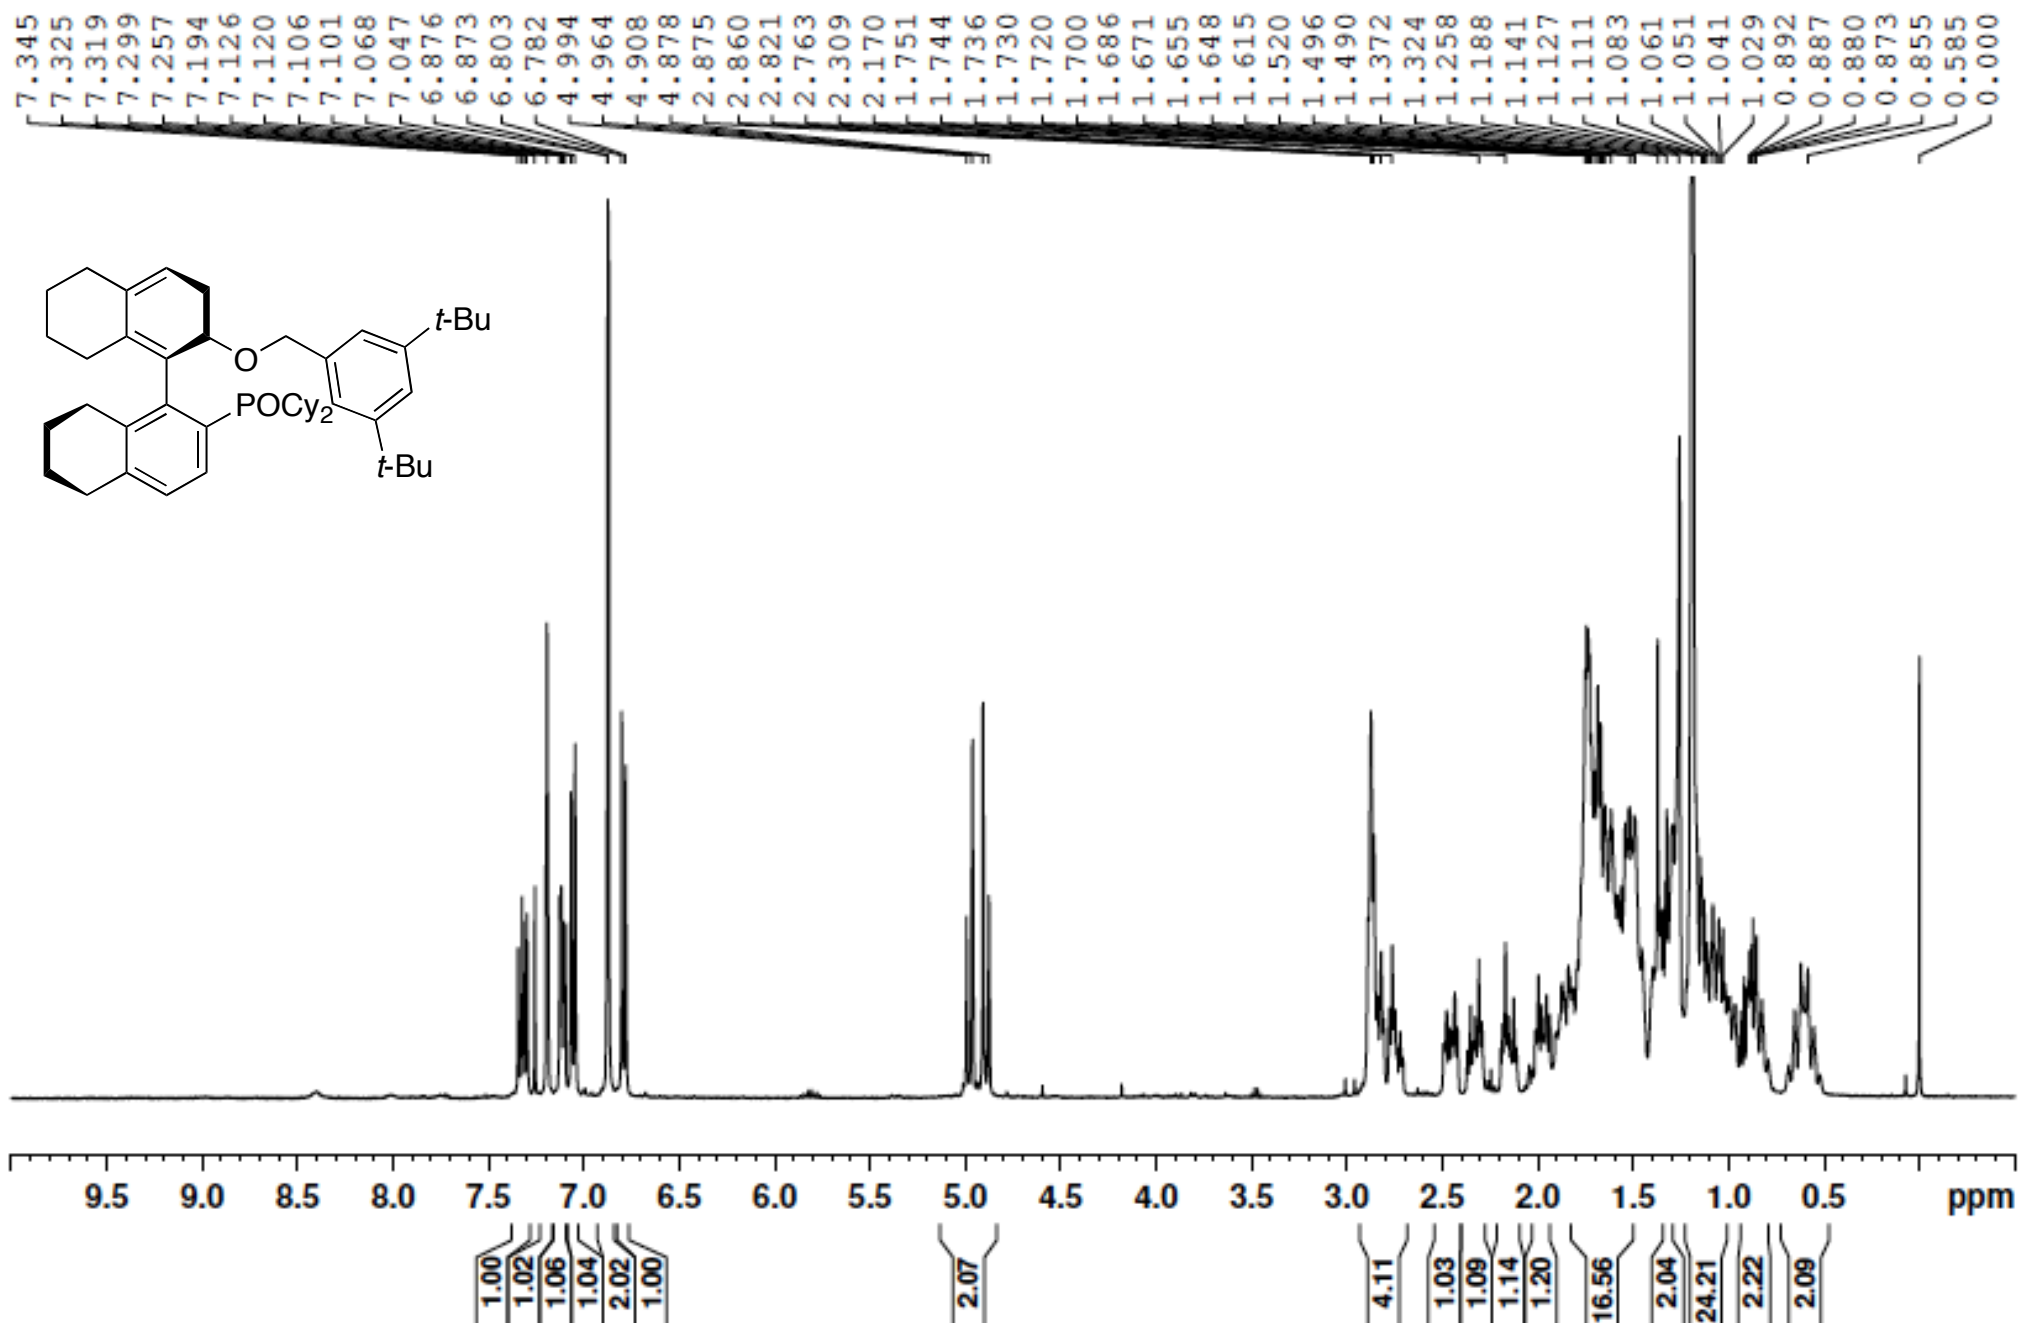

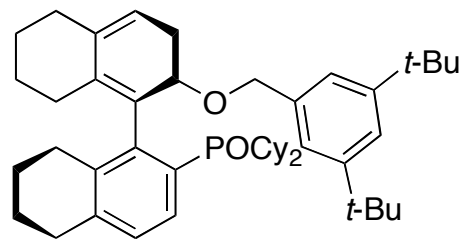

—44.89

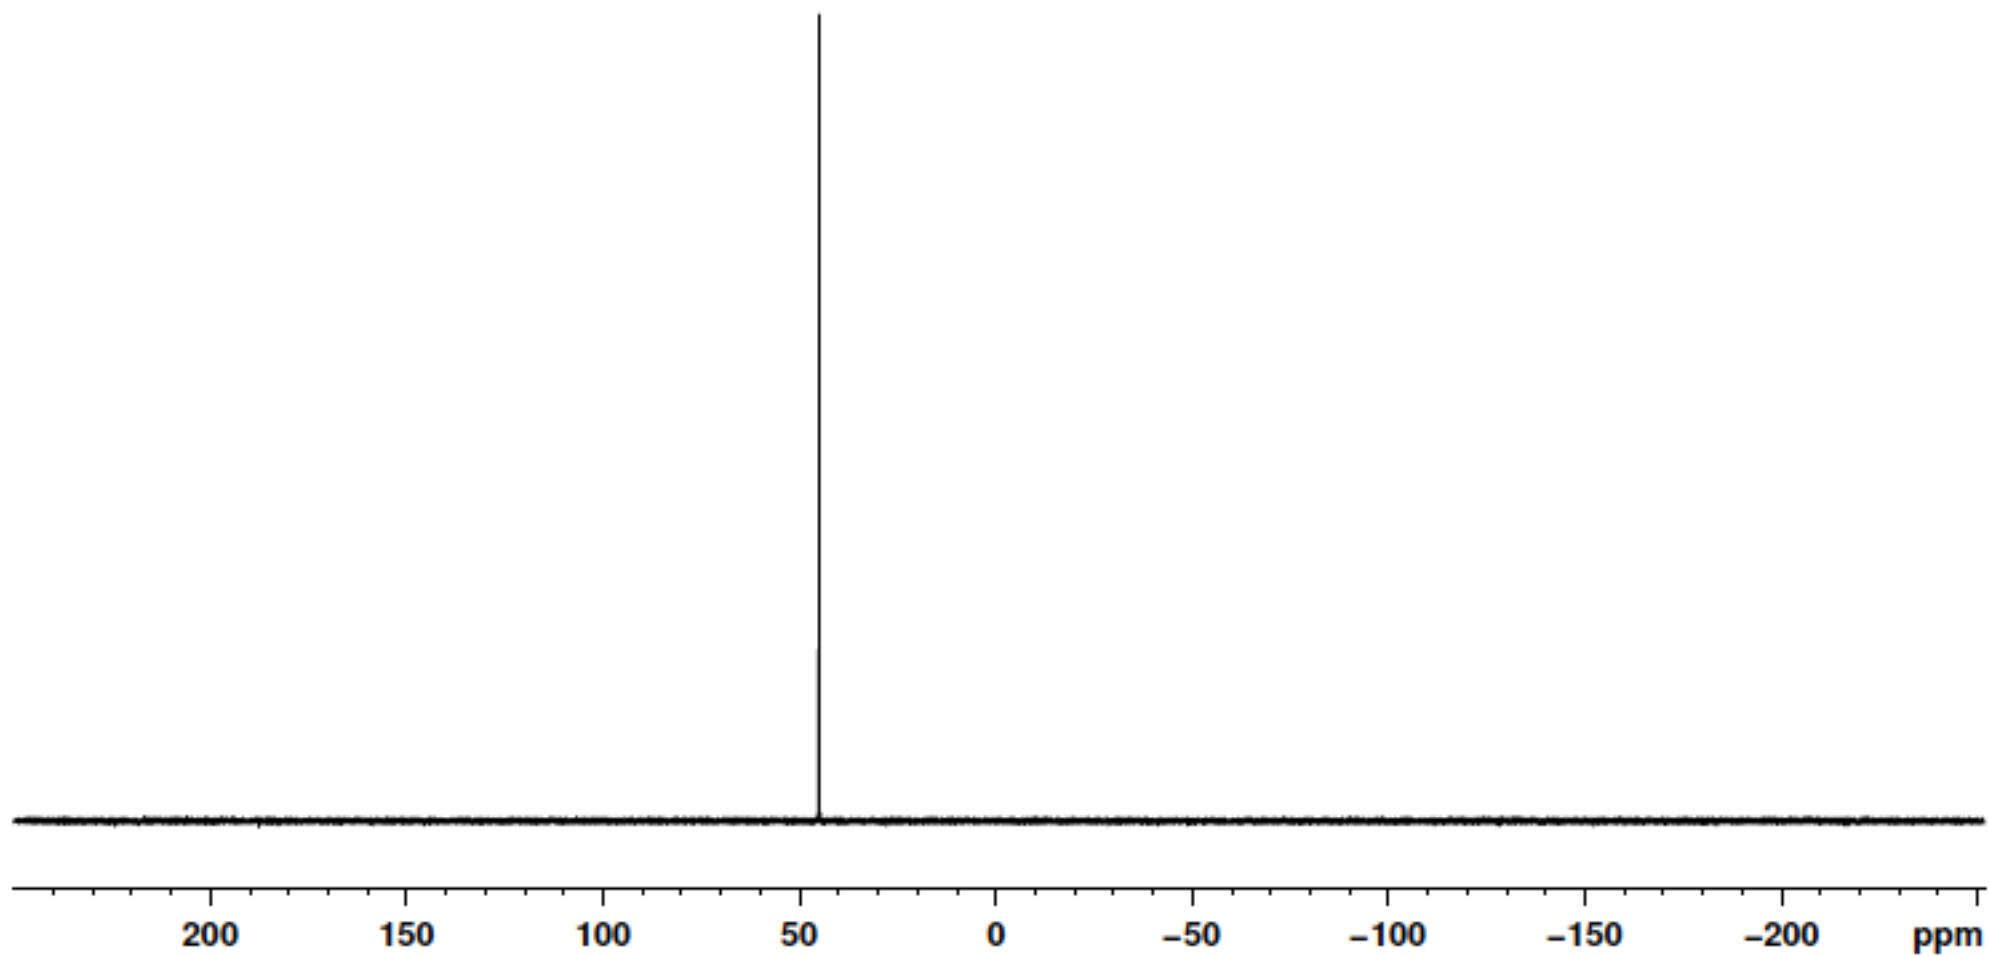

JF11-04-1 1HNMR BBFO1 CDC13  
2013-8-4

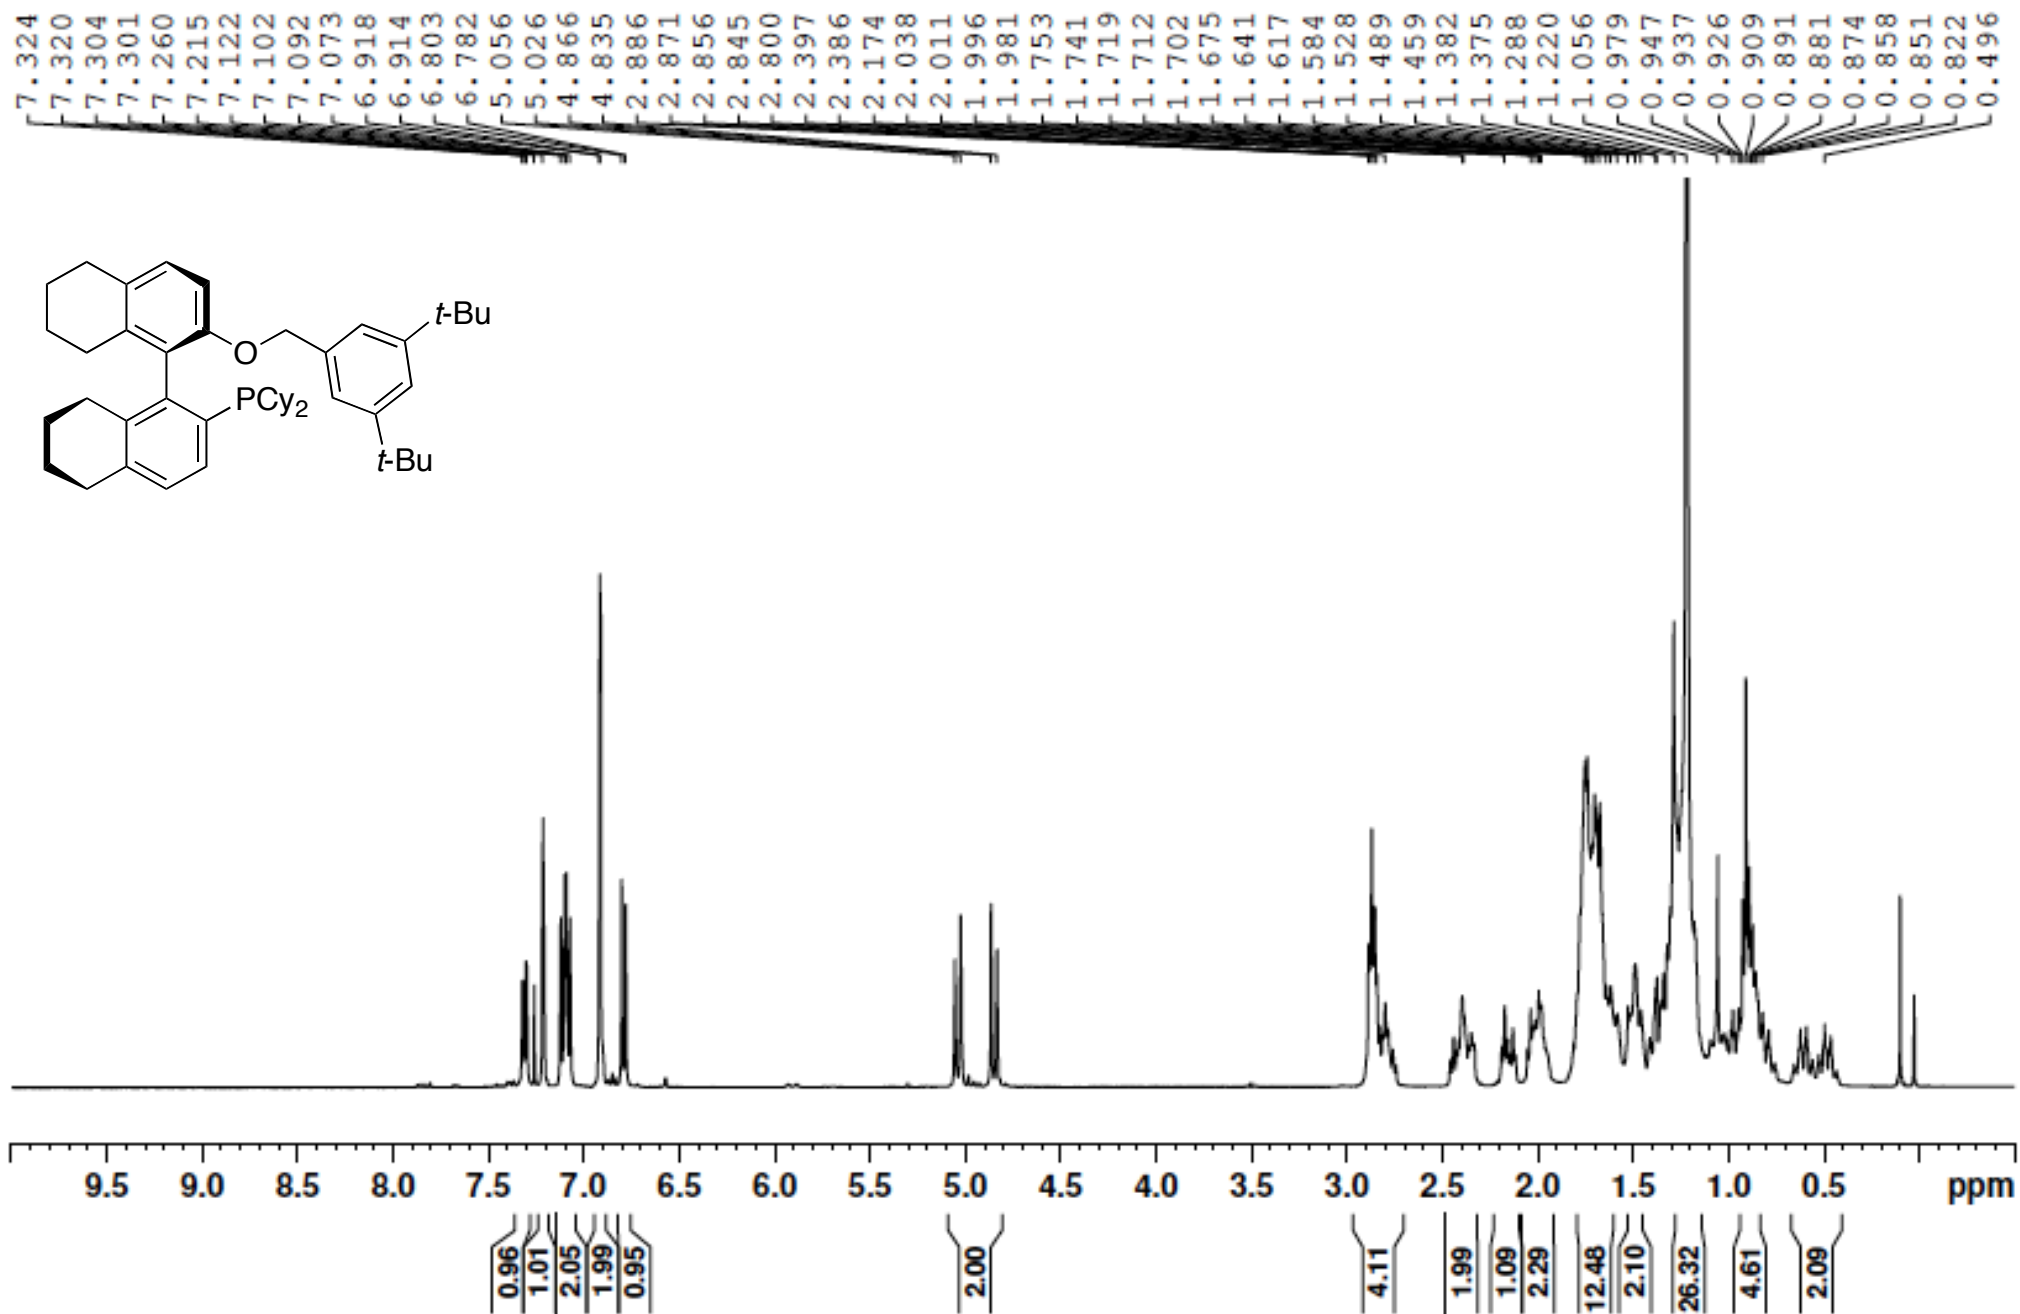

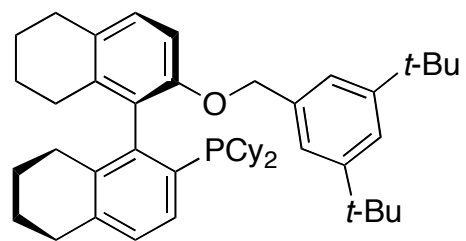

--10.01

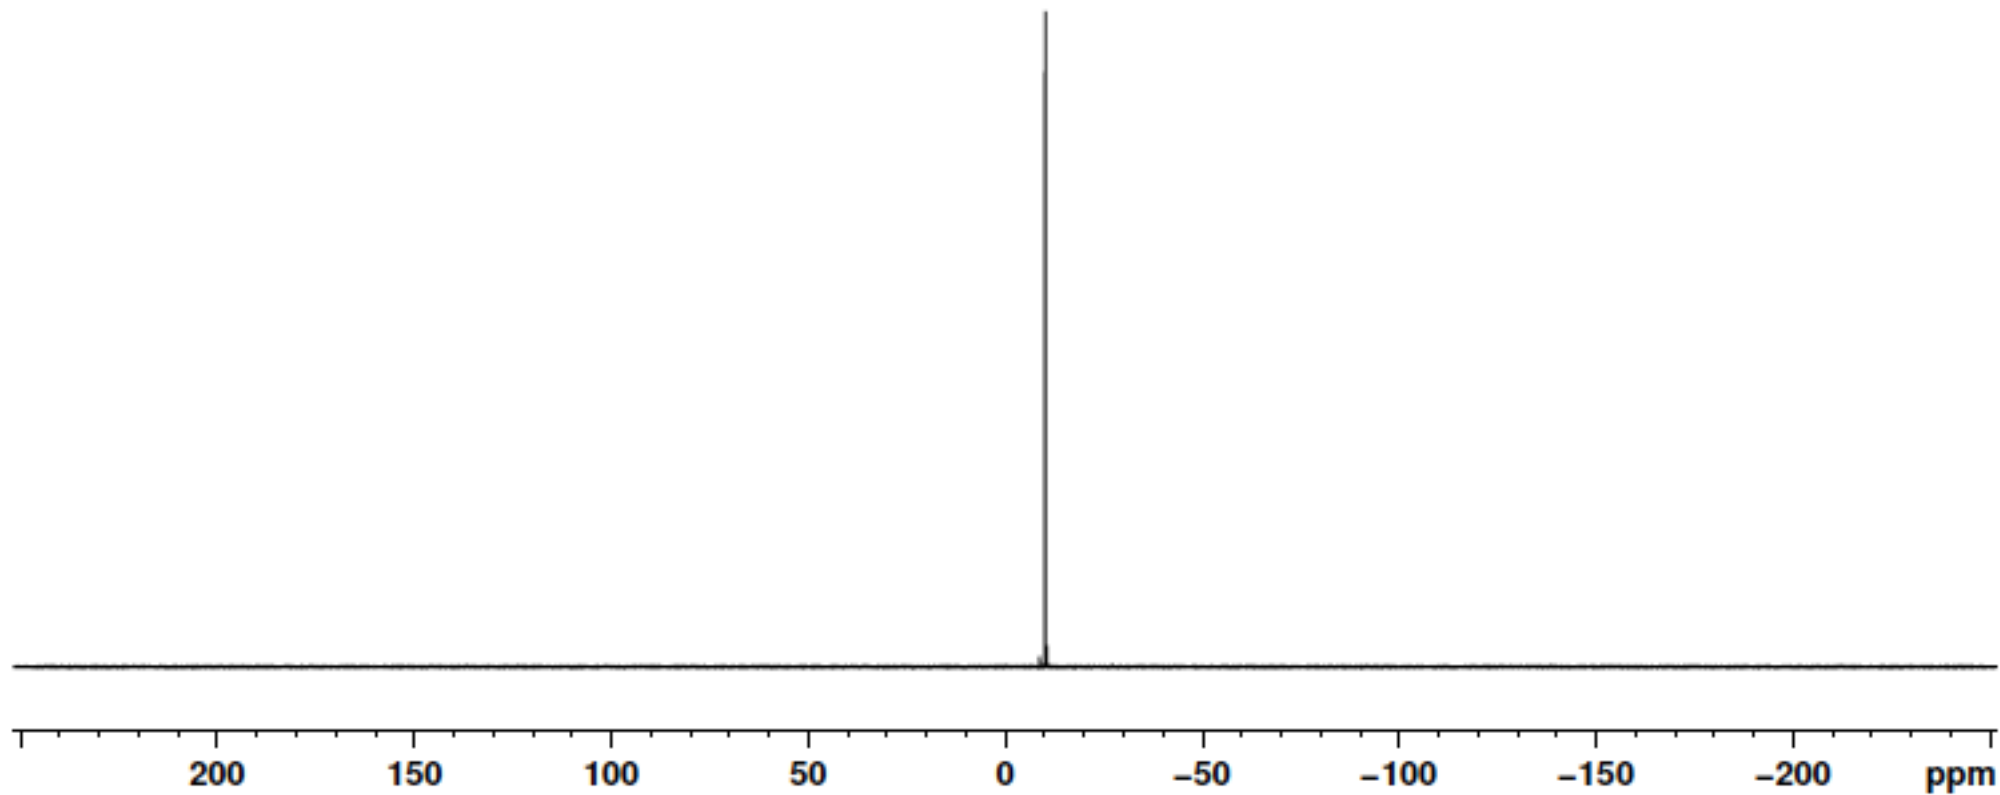

JF11-03-2 CDC13 1HNMR BBFO2

2013-08-02

2.845  
2.828  
2.813  
2.784  
2.770  
2.756  
2.661  
2.646  
2.618  
2.505  
2.463  
2.313  
2.286  
2.270  
2.253  
2.140  
2.125  
2.098  
2.013  
1.996  
1.971  
1.901  
1.865  
1.858  
1.849  
1.821  
1.798  
1.783  
1.754  
1.744  
1.712  
1.705  
1.674  
1.640  
1.623  
1.589  
1.583  
1.573  
1.566  
1.461  
1.426  
1.392  
1.381  
1.369  
1.340  
1.254  
1.199  
1.176  
1.154  
1.132  
1.123  
1.113  
1.099  
1.076  
1.067  
0.908  
0.876  
0.760  
0.738

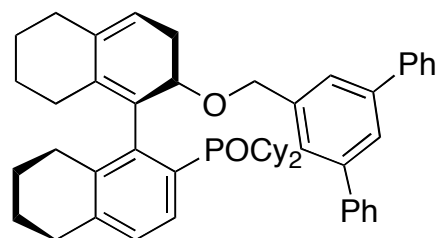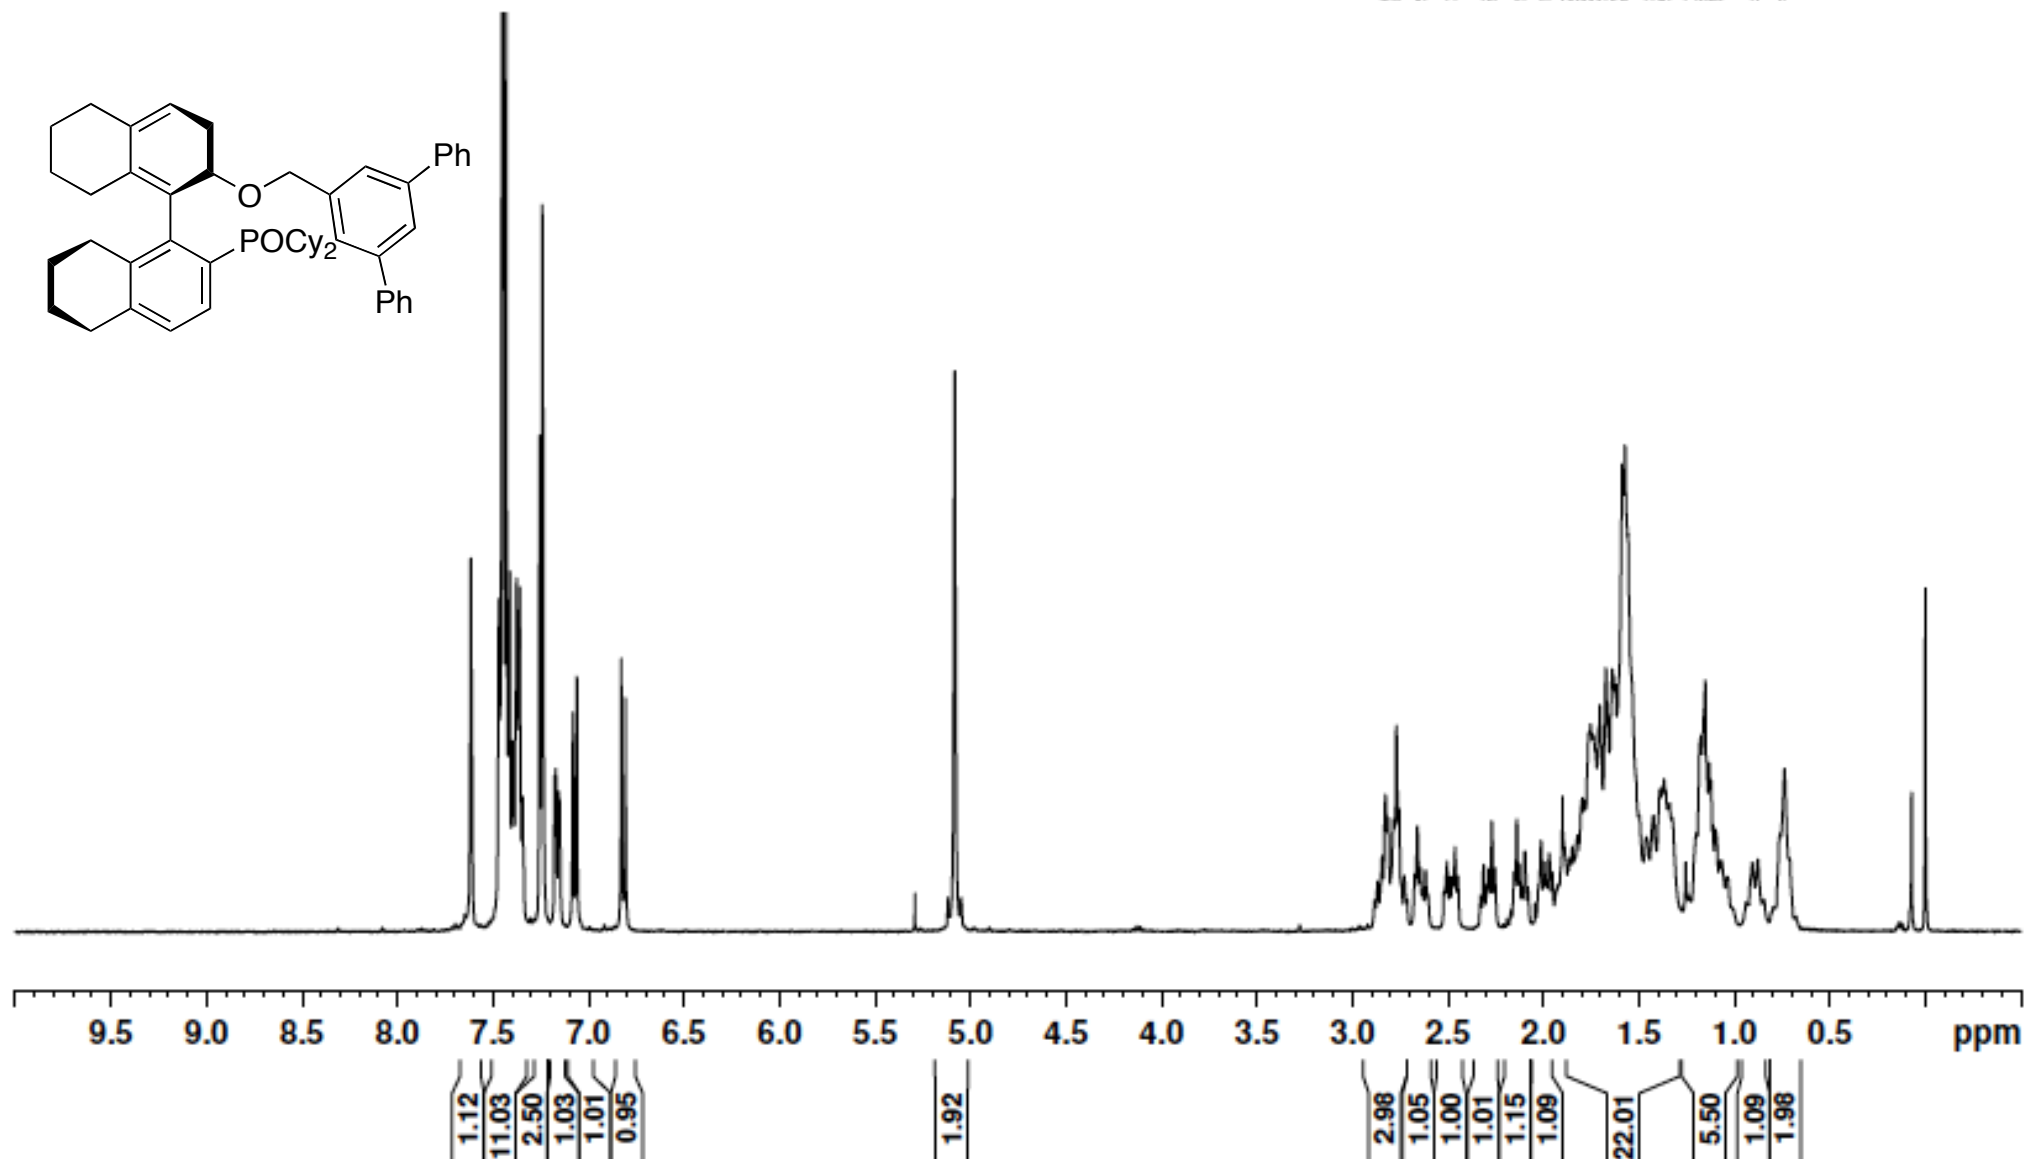

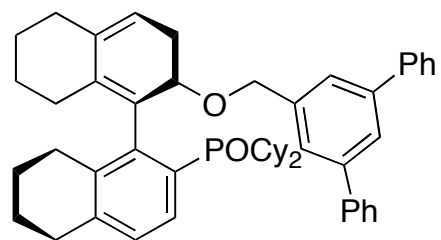

— 45.23

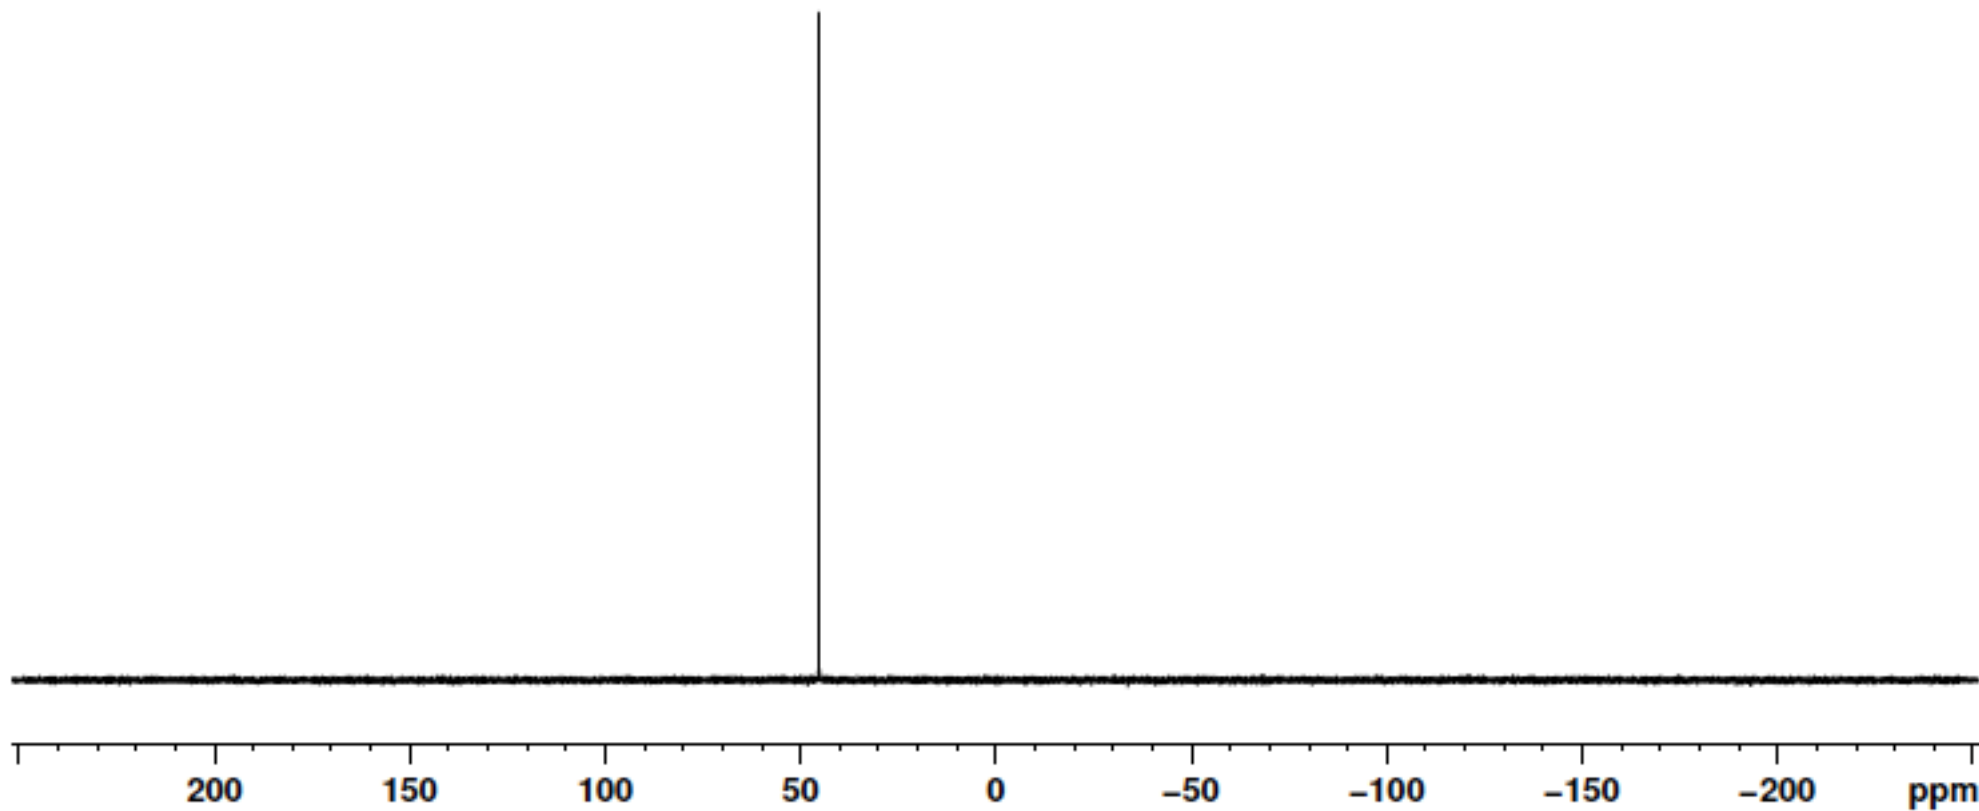

JF11-04-2 1HNMR BBFO1 CDC13  
2013-8-4

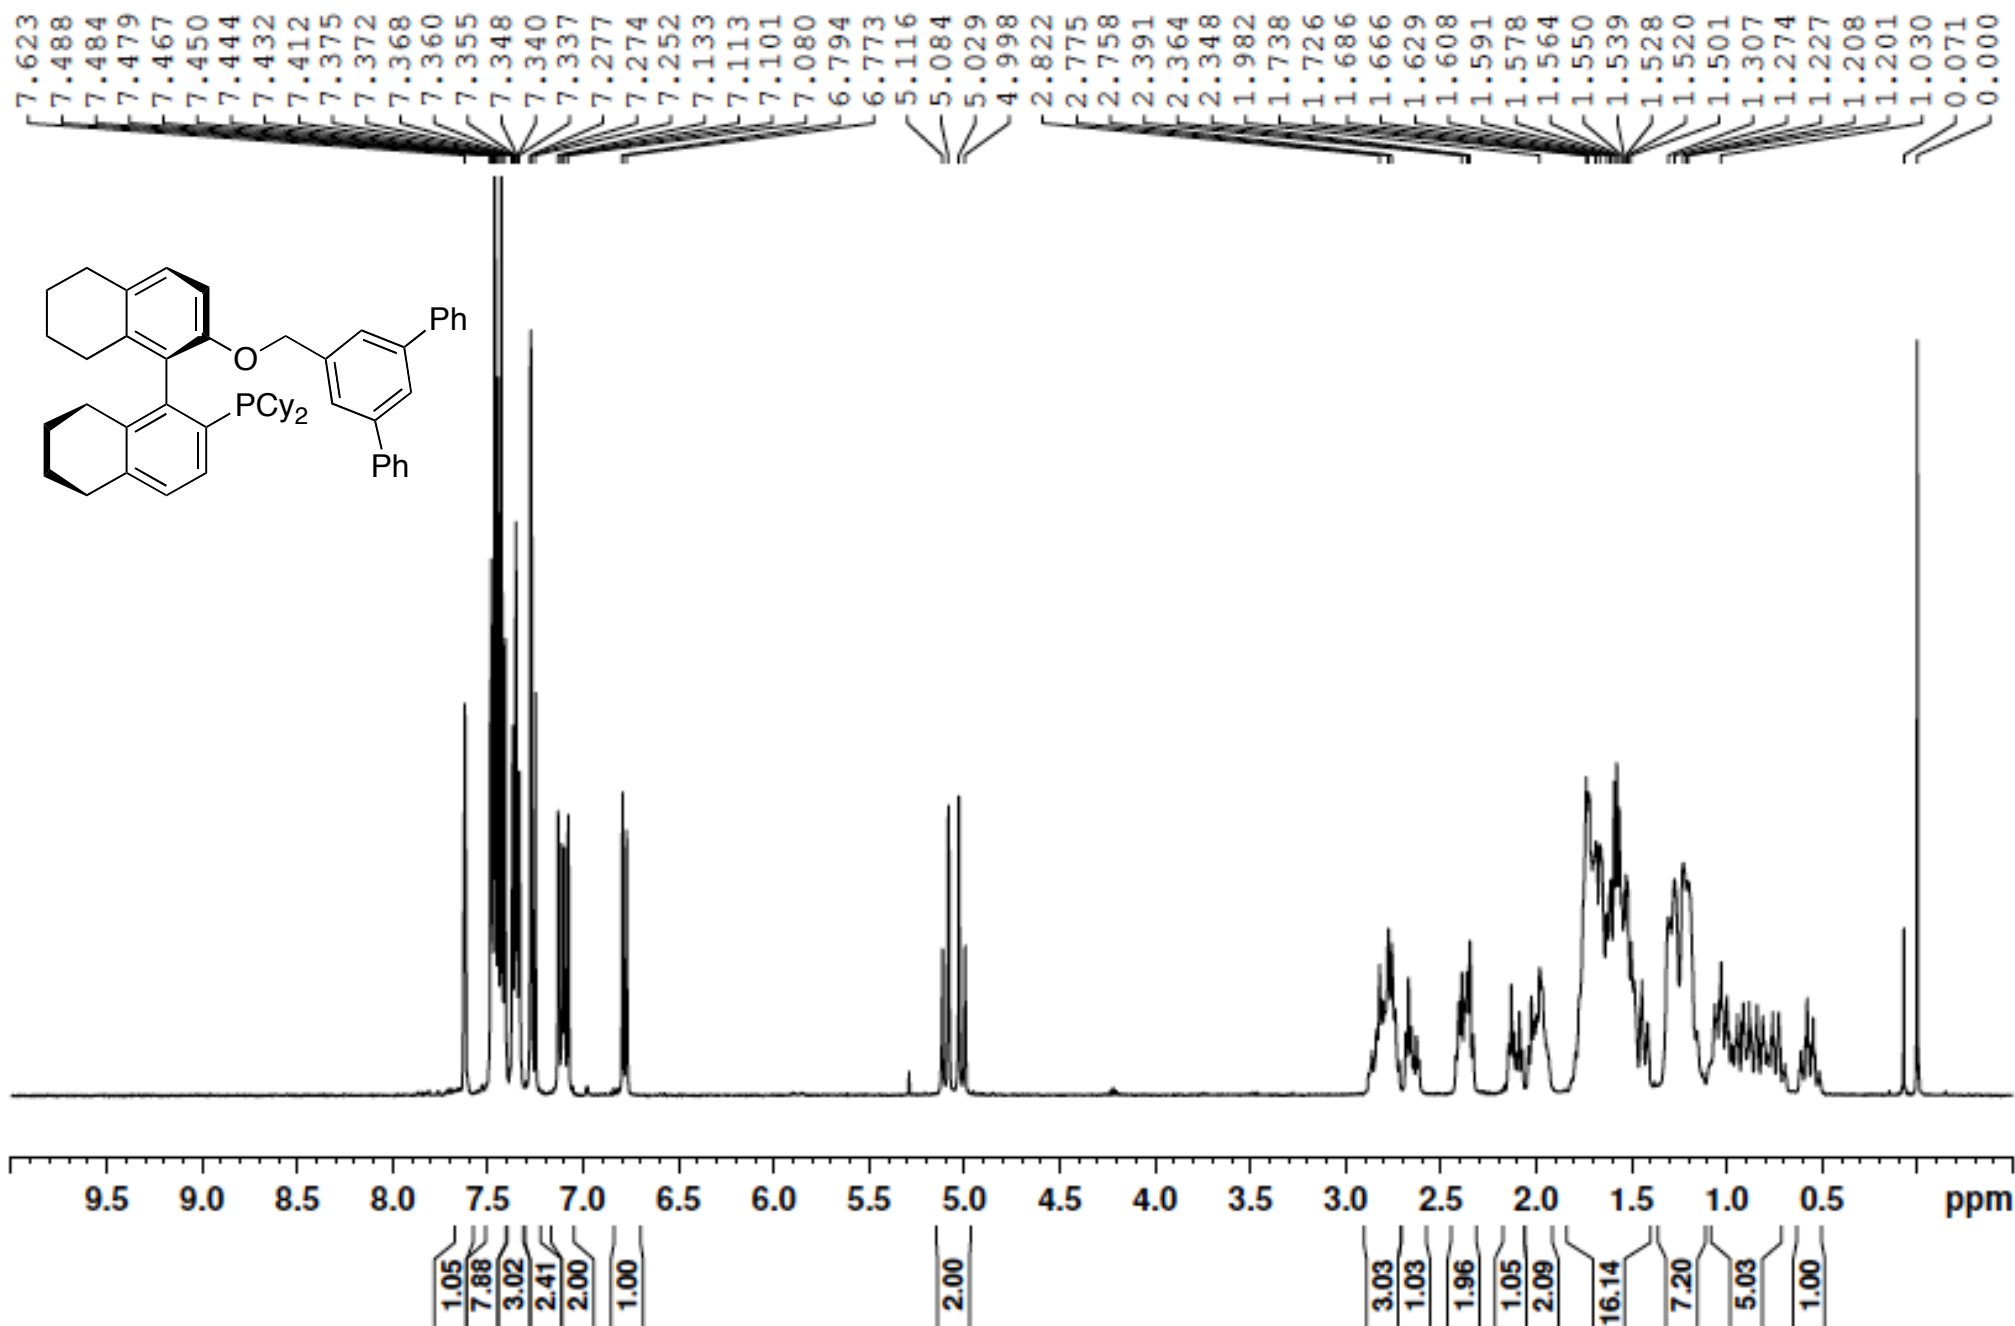



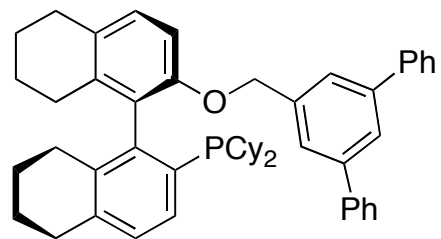

---10.04

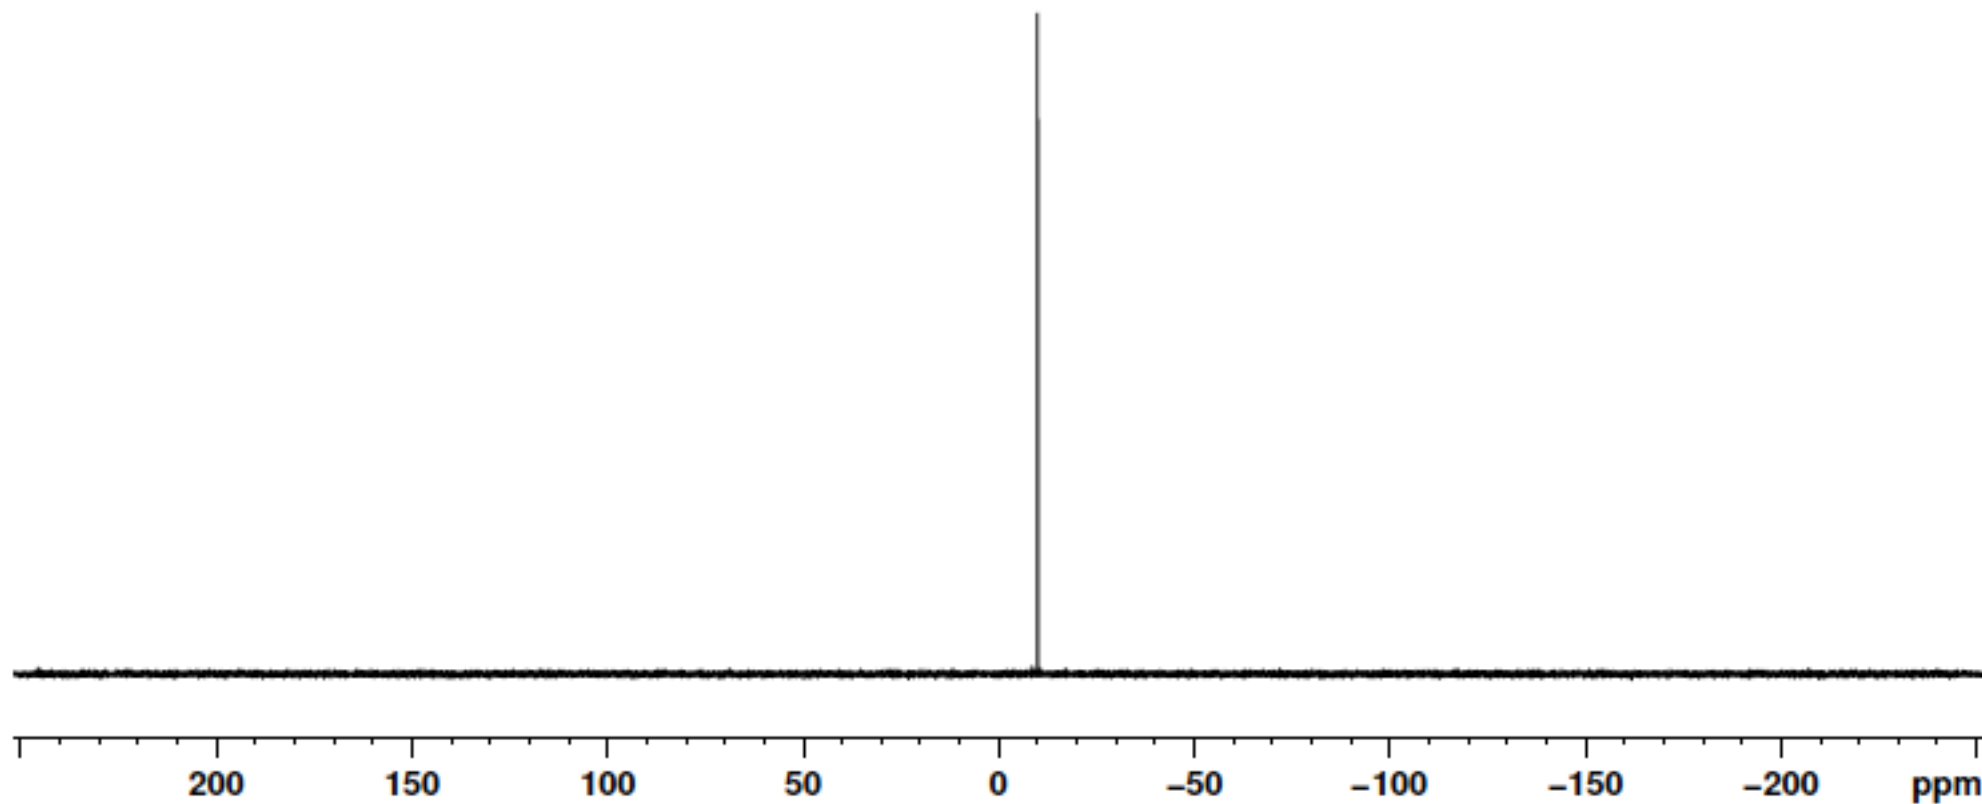

7.398  
7.378  
7.372  
7.352  
7.261  
7.112  
7.106  
7.092  
7.087  
7.042  
7.021  
6.742  
6.722  
6.276  
6.270  
6.265  
6.229  
6.223  
4.905  
3.614  
2.870  
2.855  
2.839  
2.829  
2.811  
2.796  
2.767  
2.752  
2.260  
2.150  
1.836  
1.809  
1.786  
1.771  
1.755  
1.741  
1.725  
1.707  
1.700  
1.665  
1.651  
1.639  
1.607  
1.587  
1.564  
1.526  
1.479  
1.454  
1.254  
1.189  
1.168  
1.159  
1.147  
1.140  
1.109  
0.865  
0.841  
0.071  
0.000

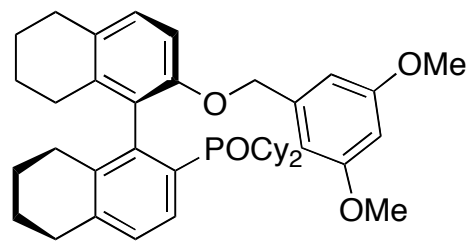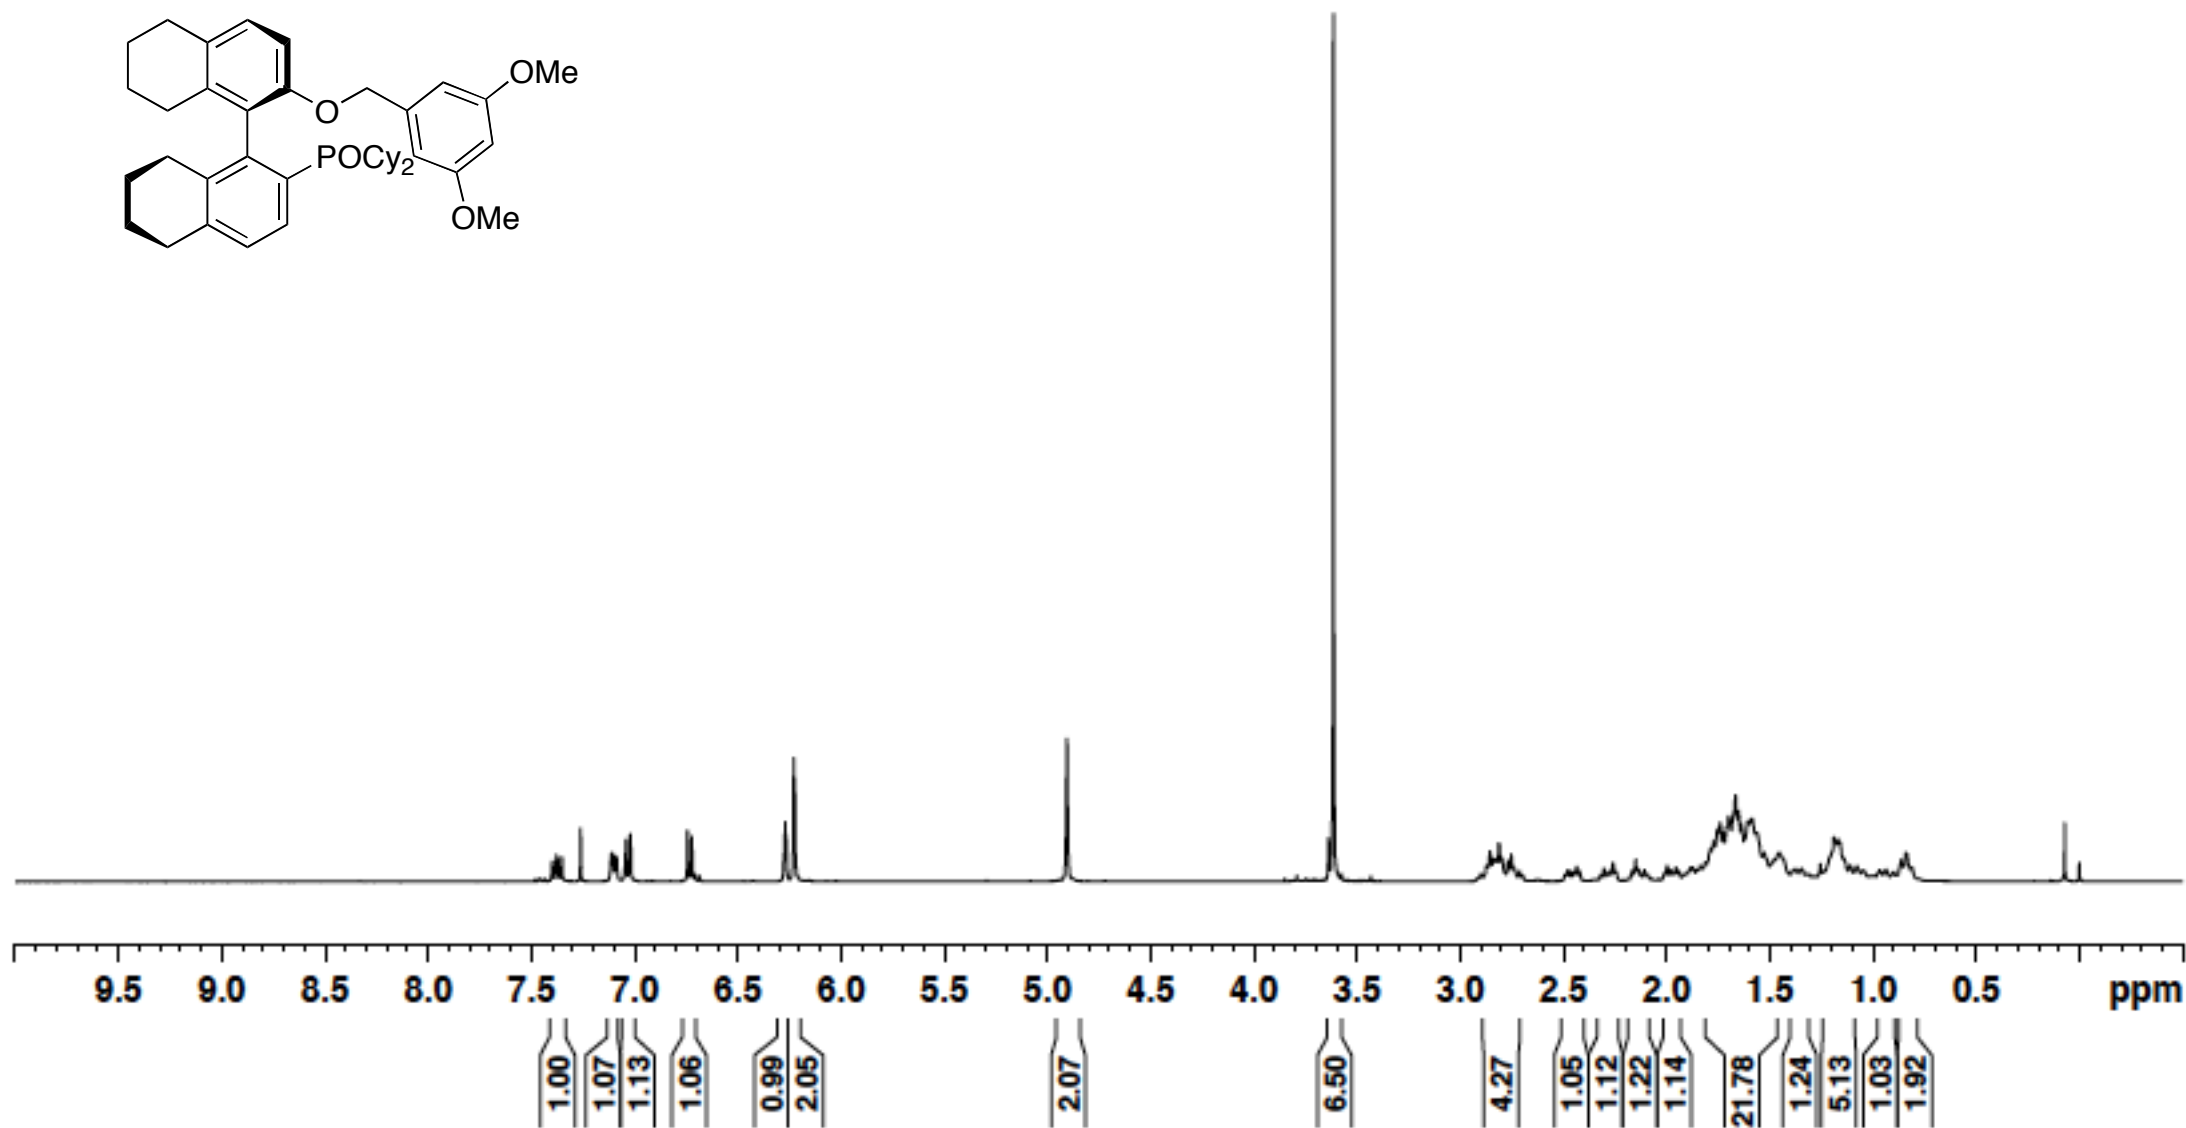

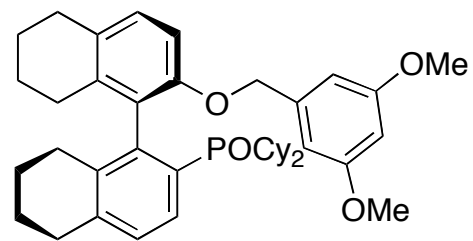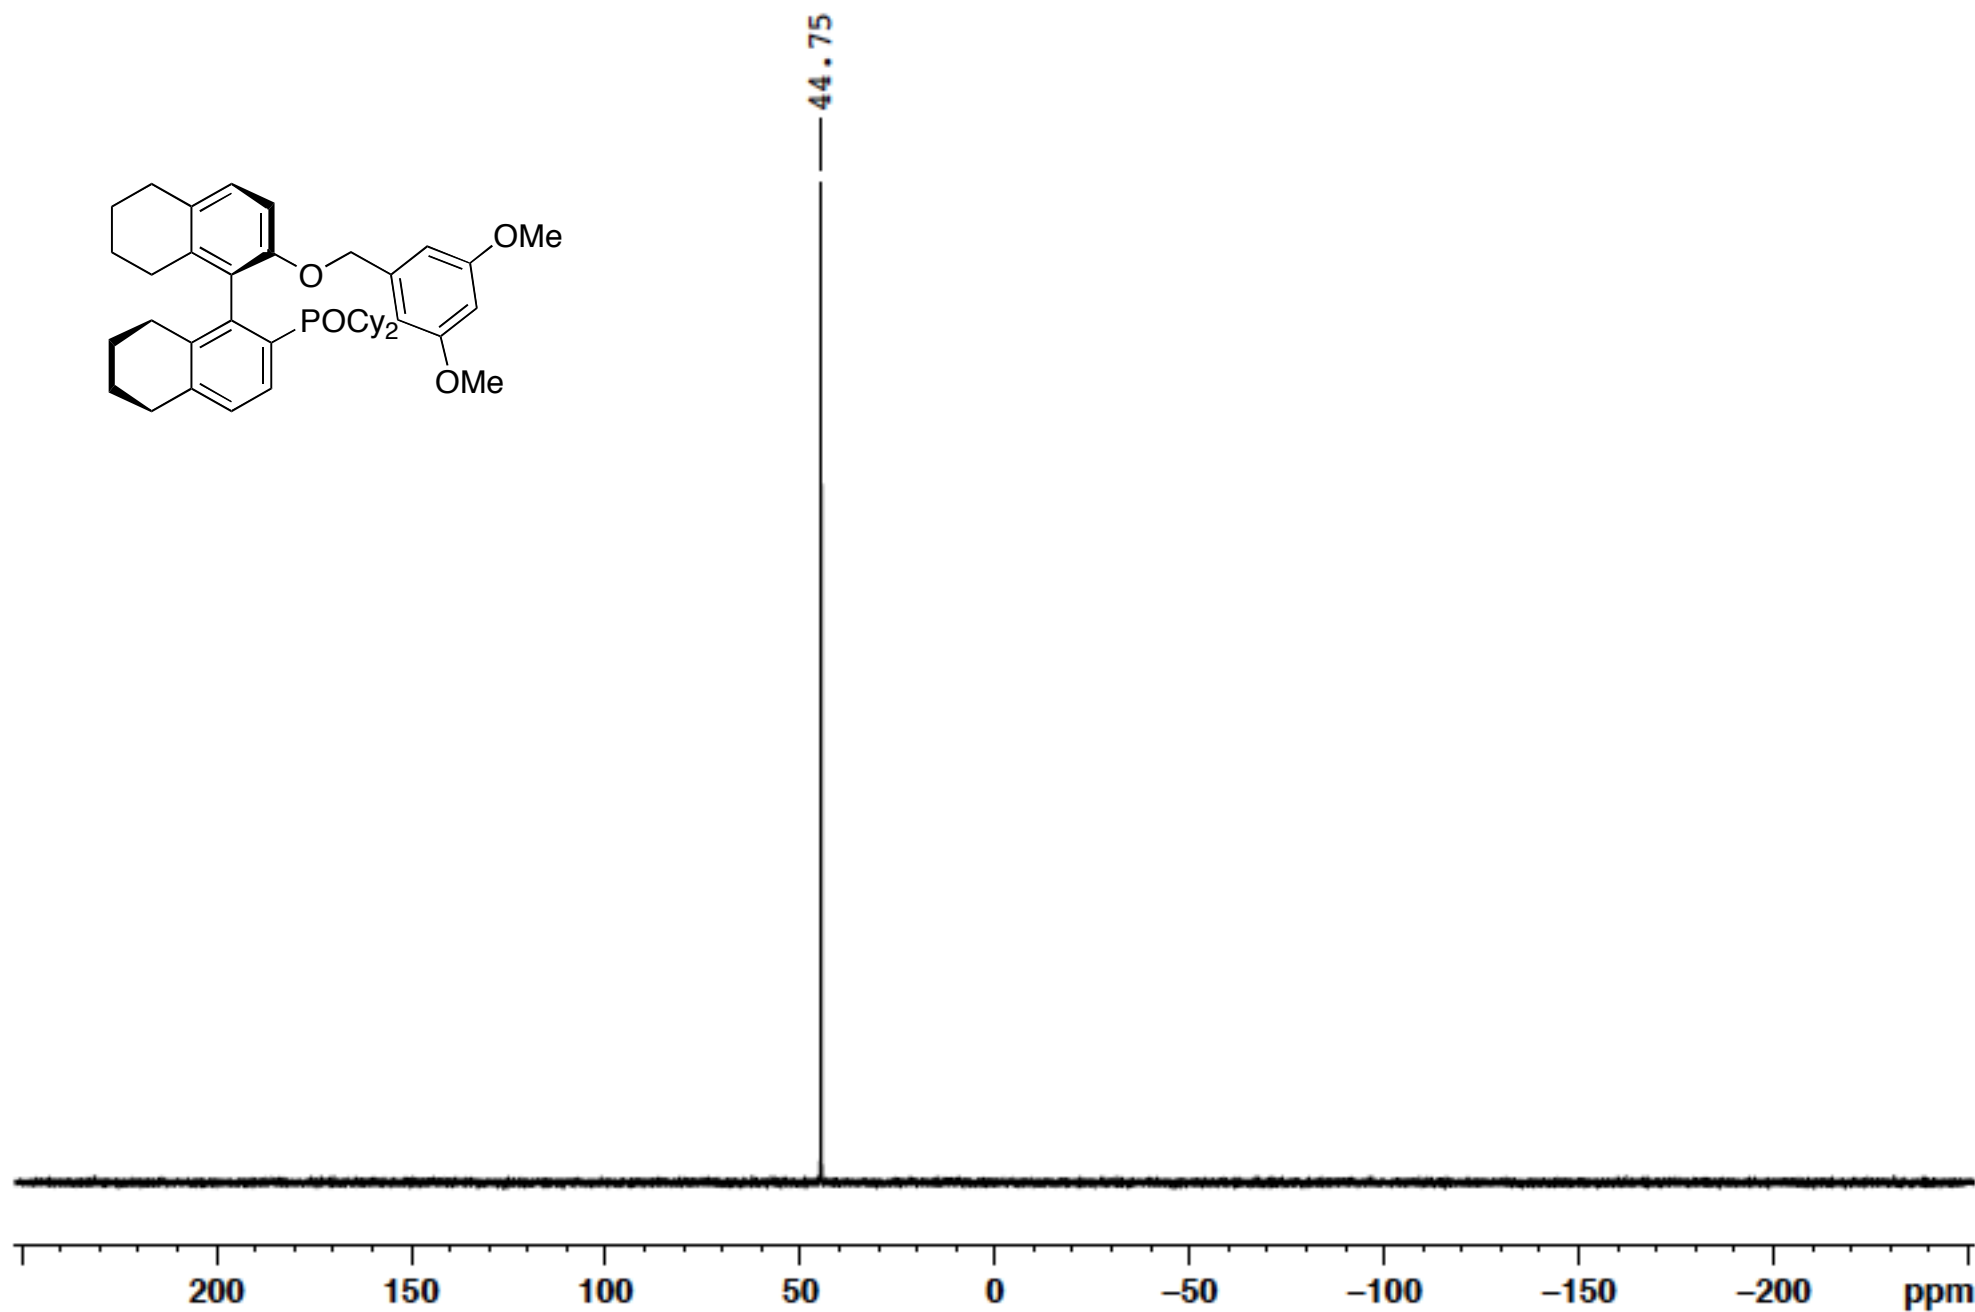

AV400 2013-09-26

7.333  
7.329  
7.314  
7.309  
7.260  
7.082  
7.061  
7.053  
7.034  
6.730  
6.709  
6.287  
6.282  
6.276  
6.263  
6.258  
4.955  
4.923  
4.867  
4.835  
3.618  
2.836  
2.819  
2.804  
2.789  
2.775  
2.365  
2.345  
1.972  
1.760  
1.740  
1.695  
1.689  
1.667  
1.653  
1.635  
1.614  
1.598  
1.563  
1.458  
1.444  
1.426  
1.379  
1.268  
1.256  
1.231  
1.219  
1.210  
1.201  
1.063  
1.055  
1.032  
1.023  
0.958  
0.953  
0.934  
0.926  
0.894  
0.084

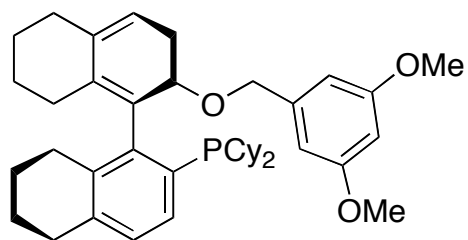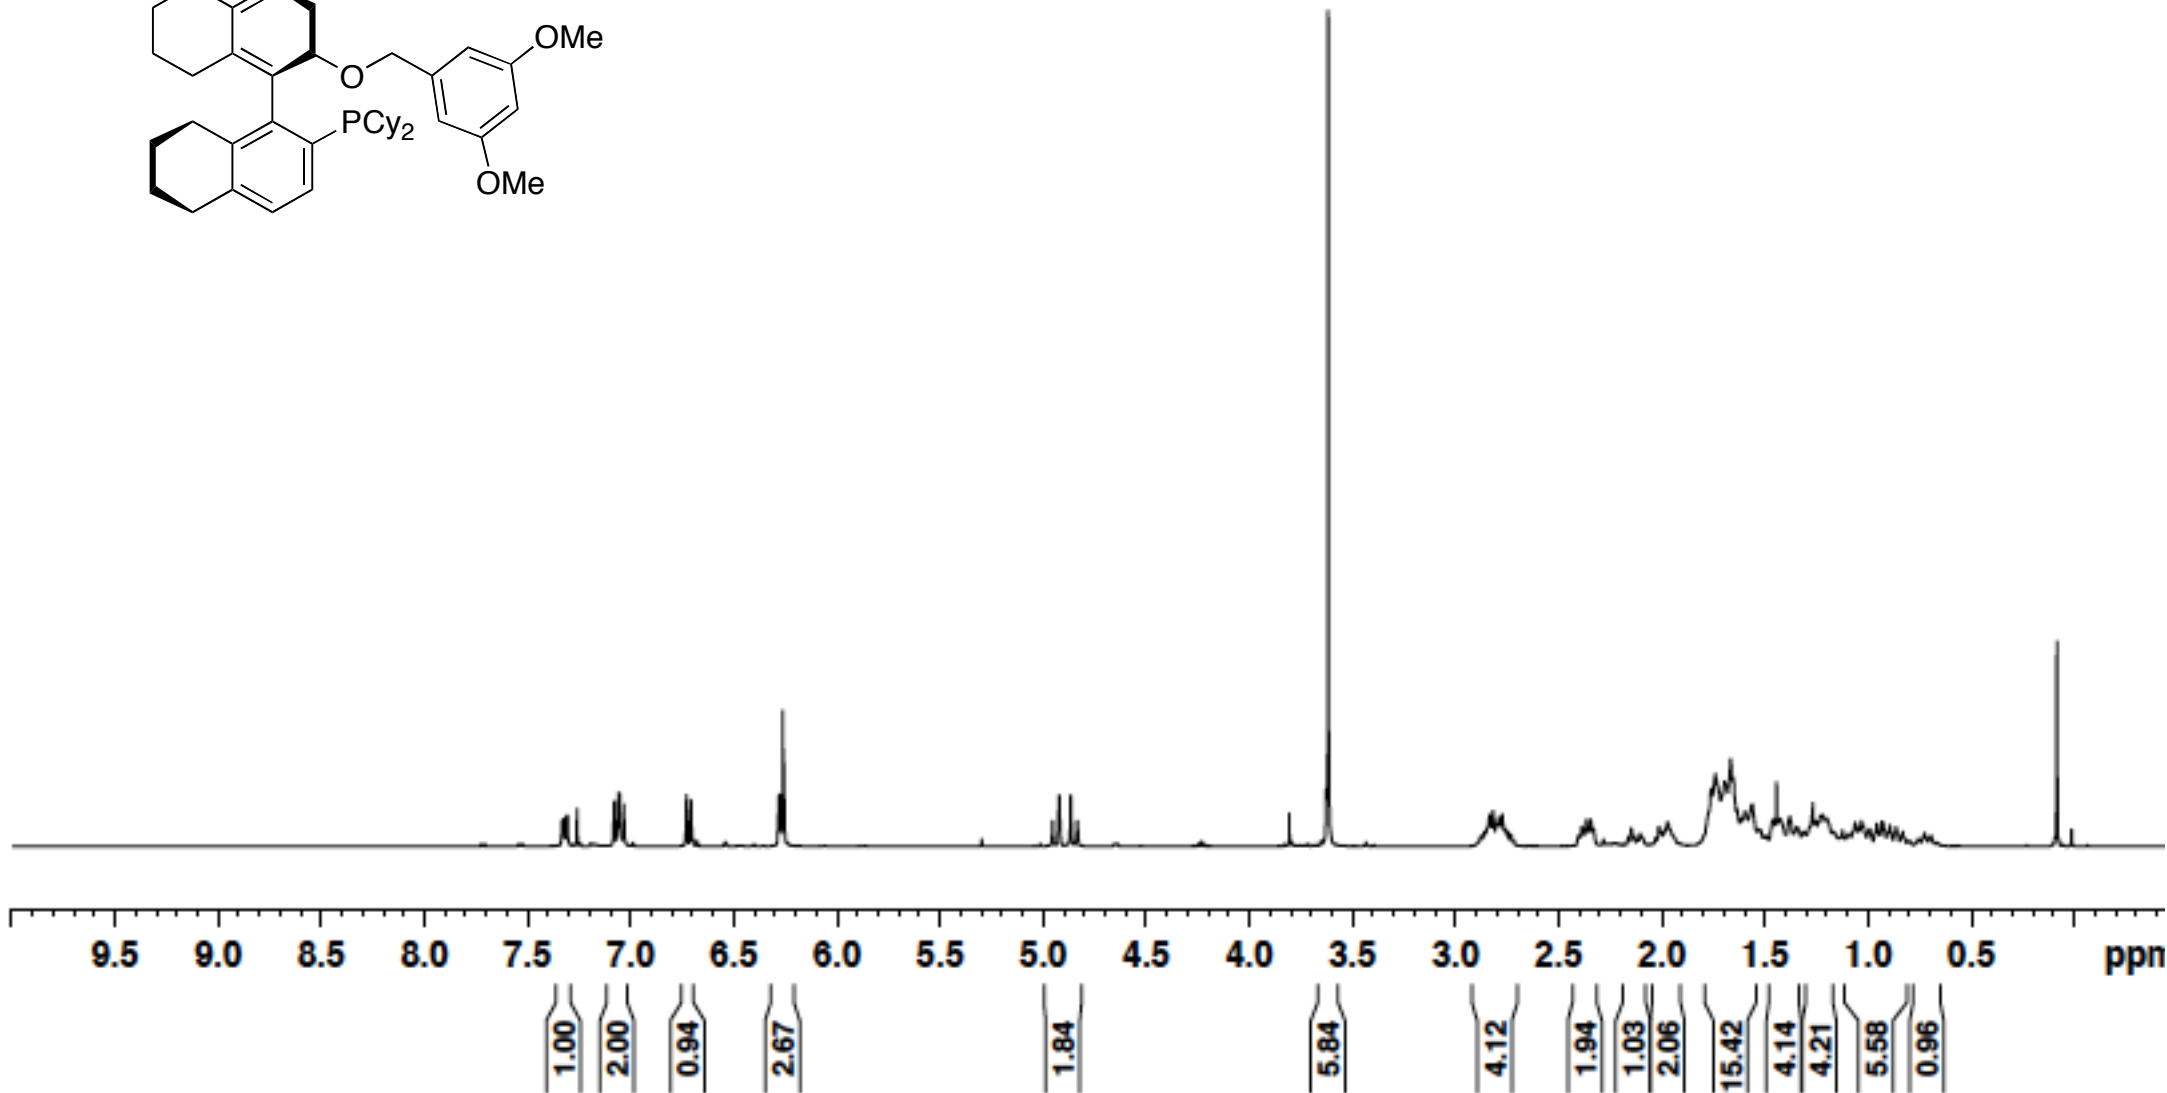

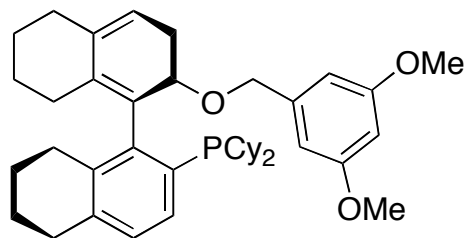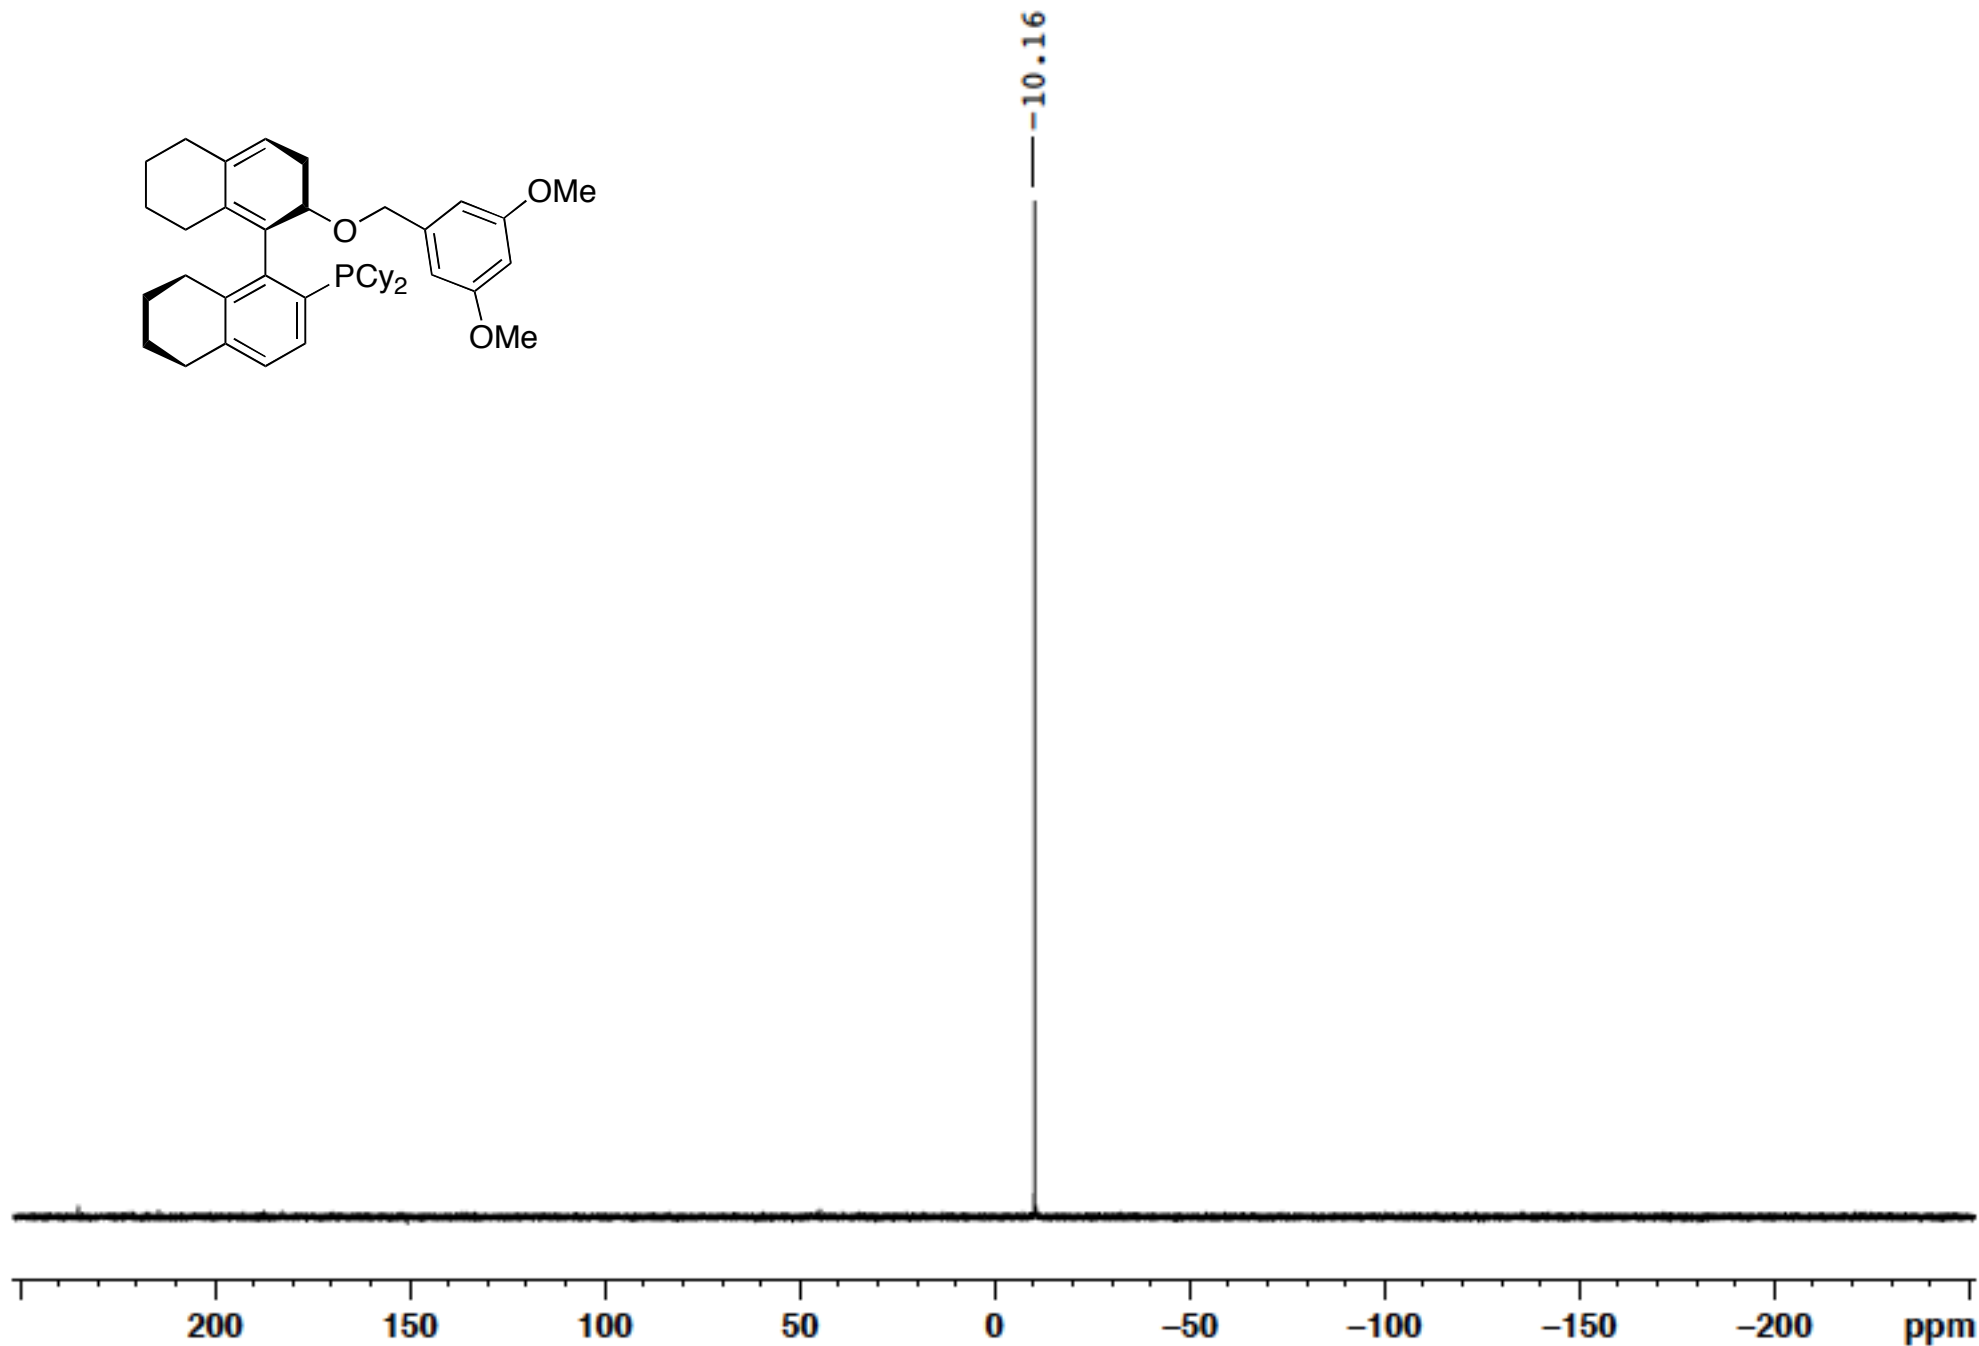

JF-L11-redo CNMR  
BBFO1 400M  
2014-01-25

160.64  
153.09  
153.08  
145.60  
145.30  
140.43  
137.52  
136.16  
136.14  
136.05  
135.99  
132.41  
132.26  
129.54  
129.52  
129.34  
129.28  
128.83  
128.74  
127.43  
127.23  
108.17  
102.97  
99.84

77.36  
77.04  
76.72  
68.01  
55.19  
35.29  
35.14  
32.88  
32.75  
30.39  
30.25  
30.05  
30.00  
29.91  
29.35  
29.08  
28.96  
28.28  
28.24  
27.69  
27.61  
27.51  
27.31  
27.26

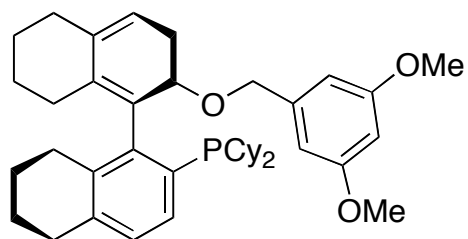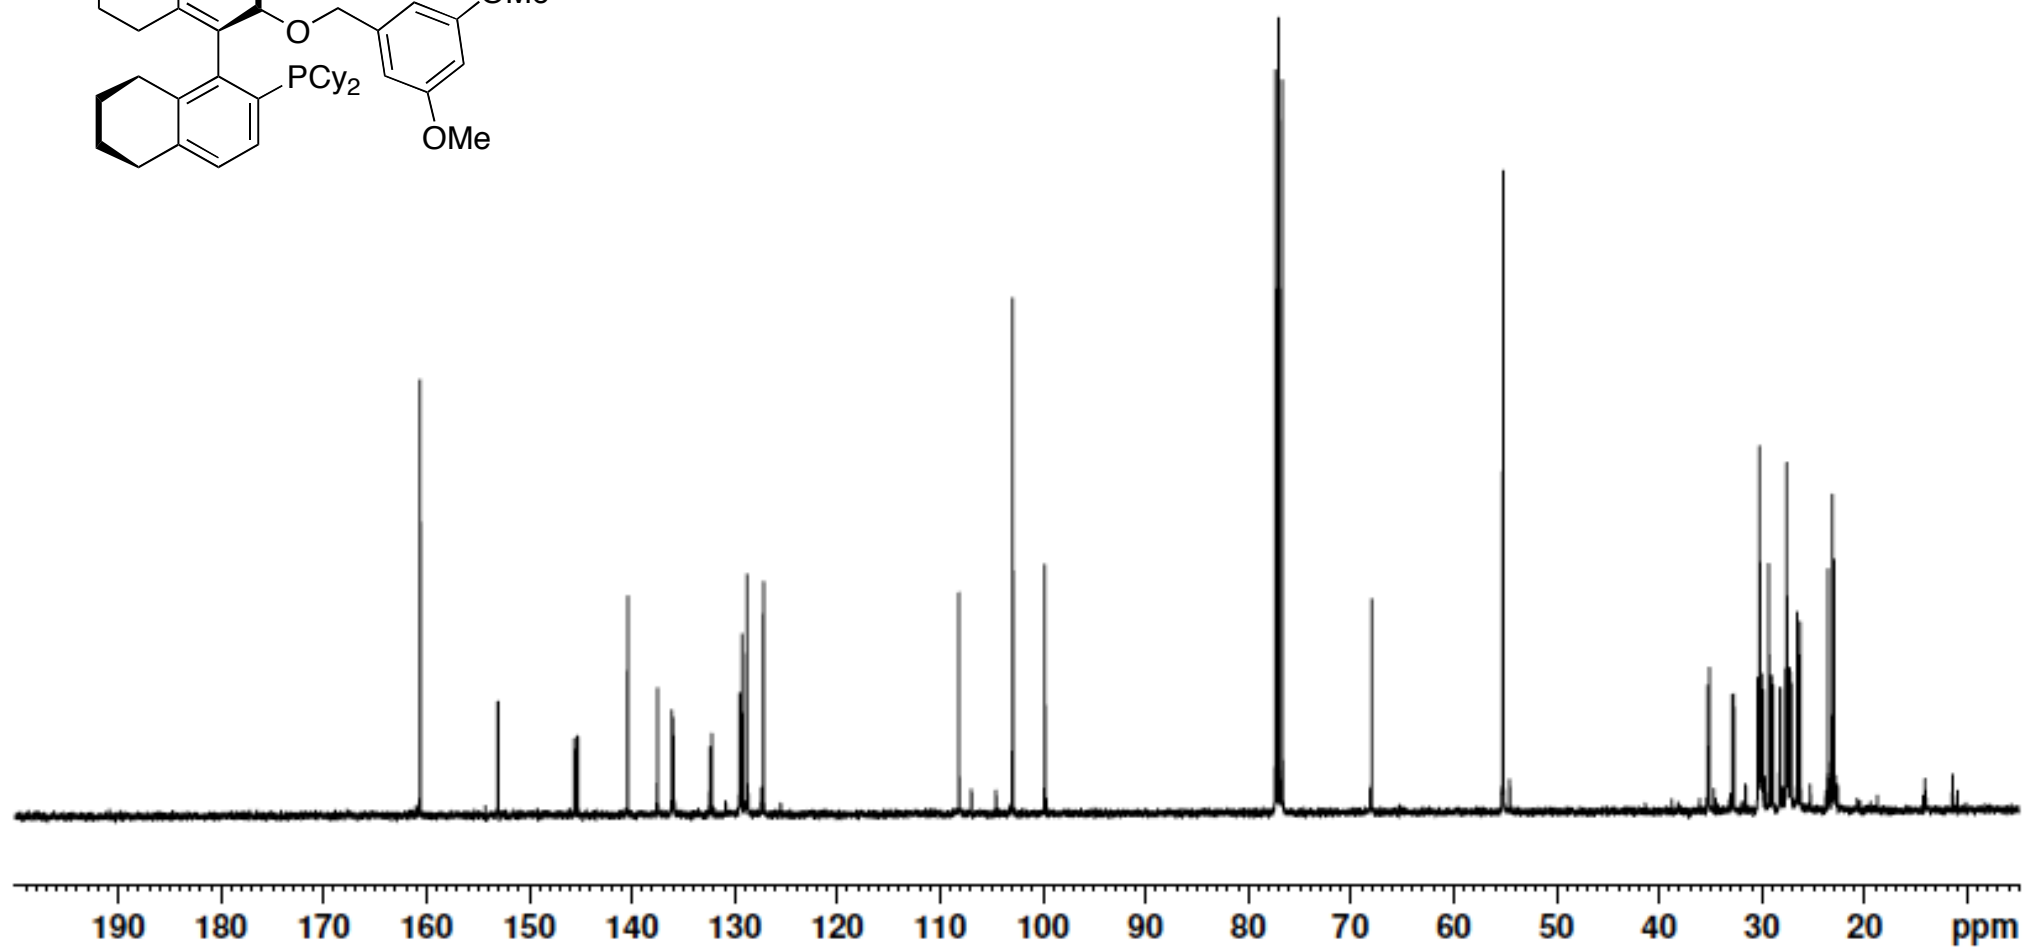

JF12-017, 1H, CDCl3

BBFO1 400MHz,

2013, 06, Dec

S39

8.040  
8.035  
8.017  
7.994  
7.980  
7.960  
7.889  
7.869  
7.791  
7.768  
7.746  
7.604  
7.542  
7.533  
7.527  
7.521  
7.513  
7.507  
7.399  
7.377  
7.347  
7.330  
7.312  
7.310  
7.264  
7.258  
7.251  
7.221  
7.218  
7.200  
7.197  
7.180  
7.048  
7.027  
5.239  
5.207  
5.095  
5.063  
1.606  
1.510  
1.485  
1.417  
1.306  
1.294  
1.261  
1.254  
1.226  
1.217  
1.208  
1.195  
1.186  
1.175  
1.066  
1.042  
1.015  
0.886  
0.865  
0.853  
0.000

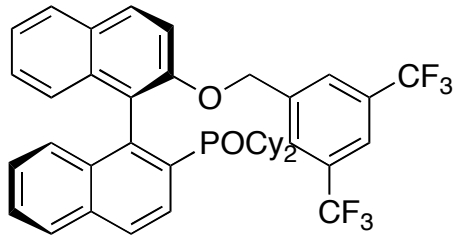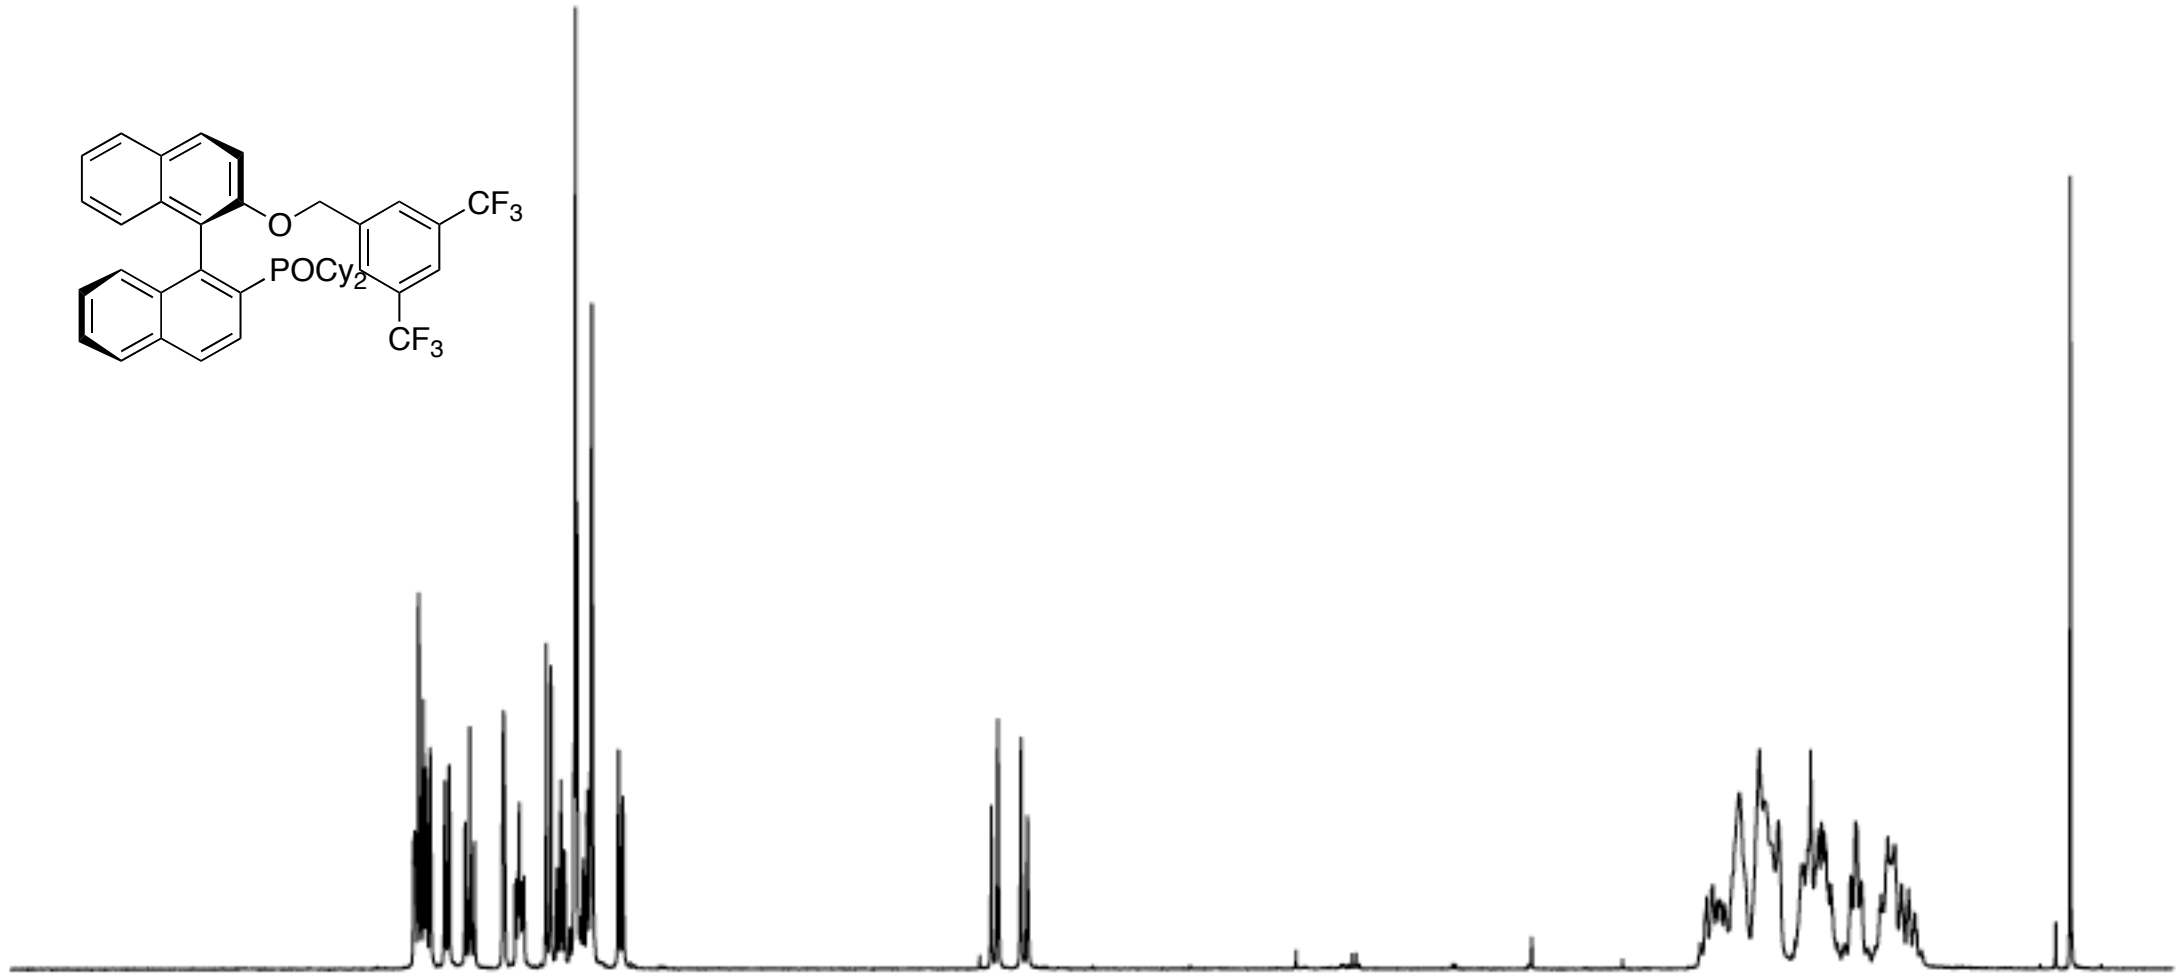

9.5 9.0 8.5 8.0 7.5 7.0 6.5 6.0 5.5 5.0 4.5 4.0 3.5 3.0 2.5 2.0 1.5 1.0 0.5 ppm

2.90 1.00 1.00 0.95 1.00 0.96 0.99 2.56 3.02 0.98 0.98 0.98 5.16 5.91 5.39 2.09 4.07

JF12-017,31P, CDCl3  
BBFO1 400MHz,  
2013, 06, Dec

S40

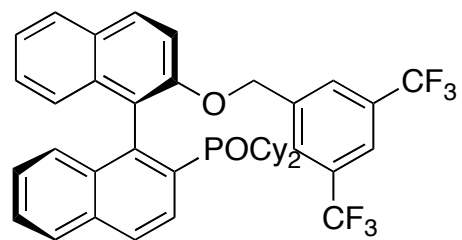

—45.63

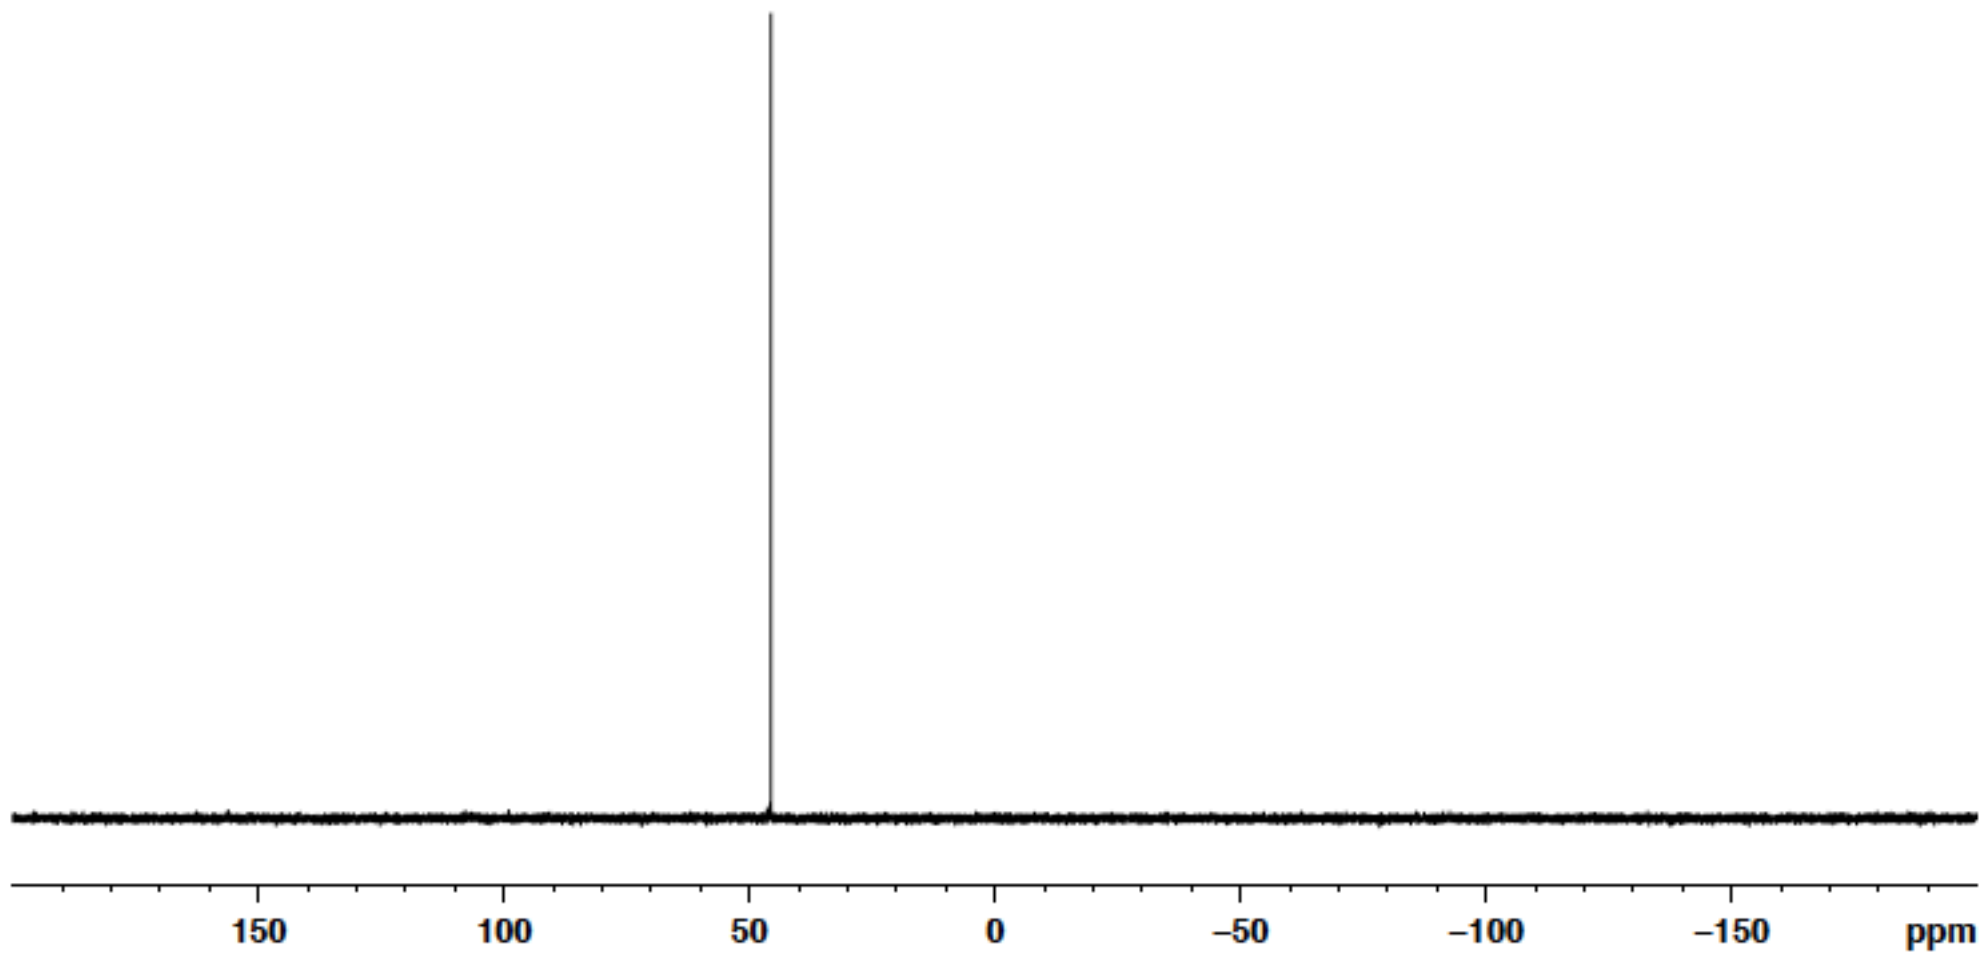



JF12-017,19F, CDC13  
BBFO1 400MHz,  
2013, 010, Dec

S41

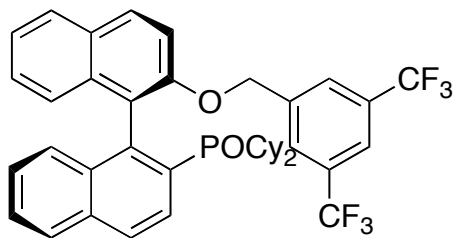

—63.04

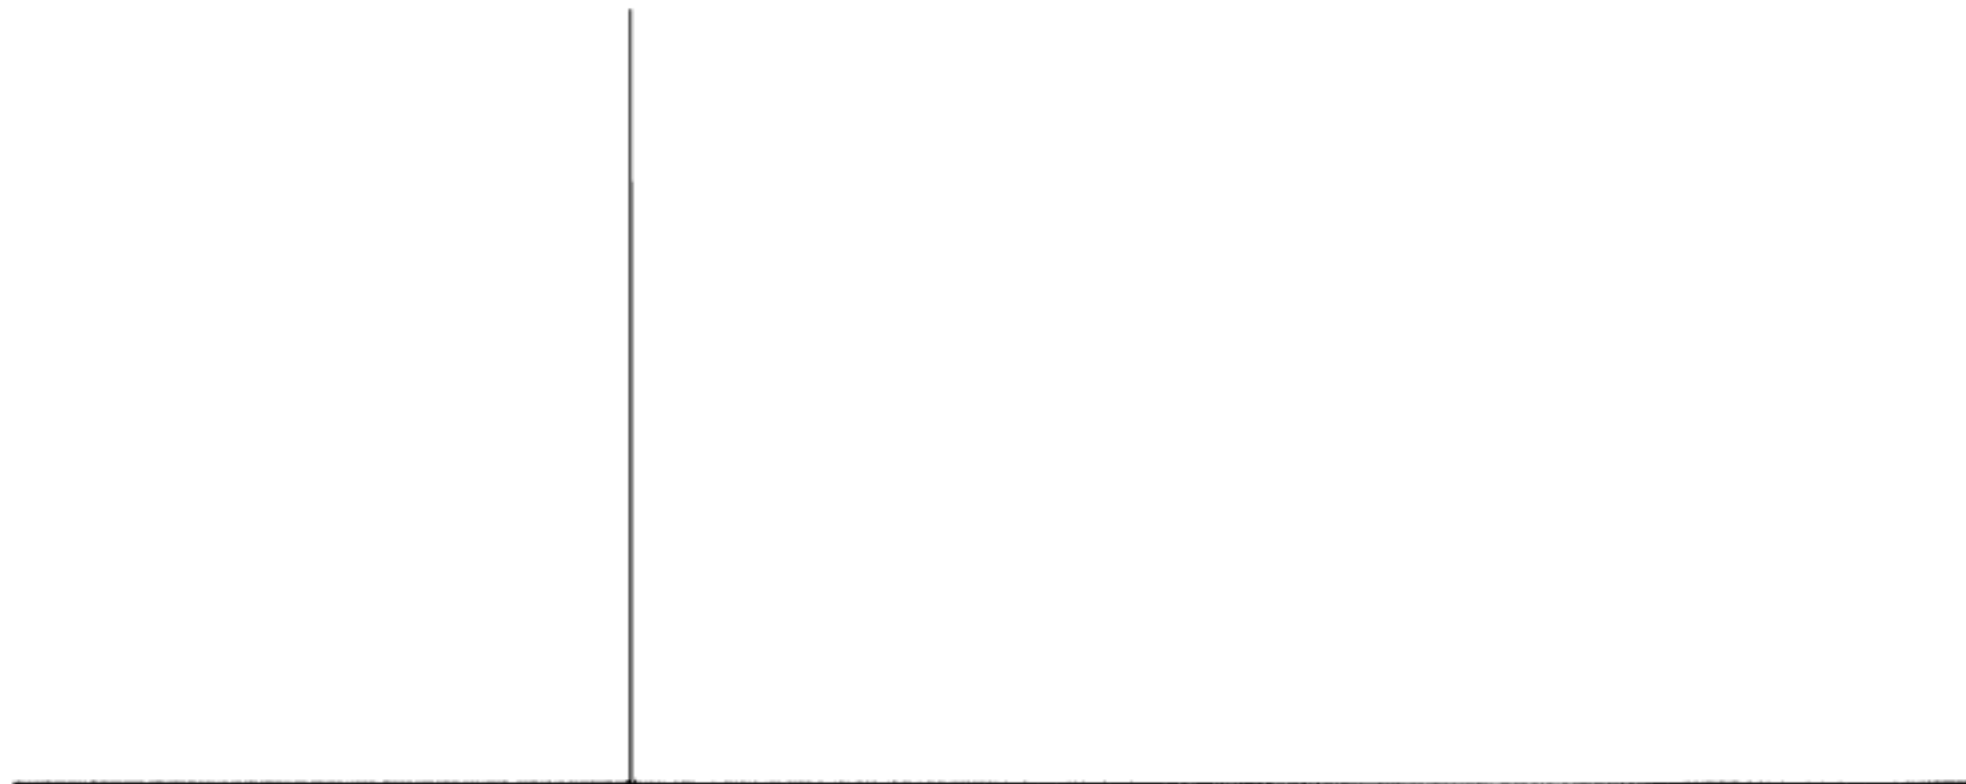

-20

-40

-60

-80

-100

-120

-140

-160

-180

ppm

JF12-019, 1H, CDCl3  
BBFO1 400MHz,  
2013, 08, Dec

S42

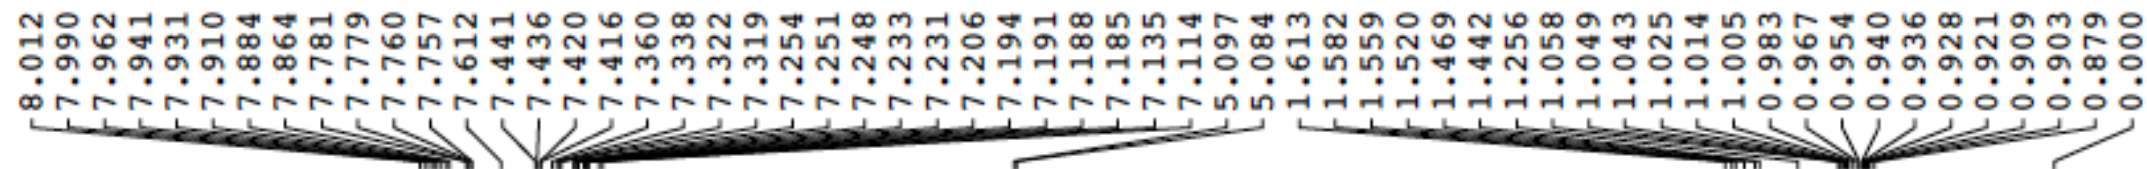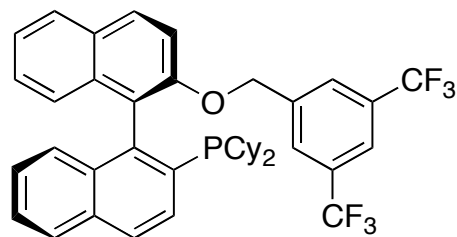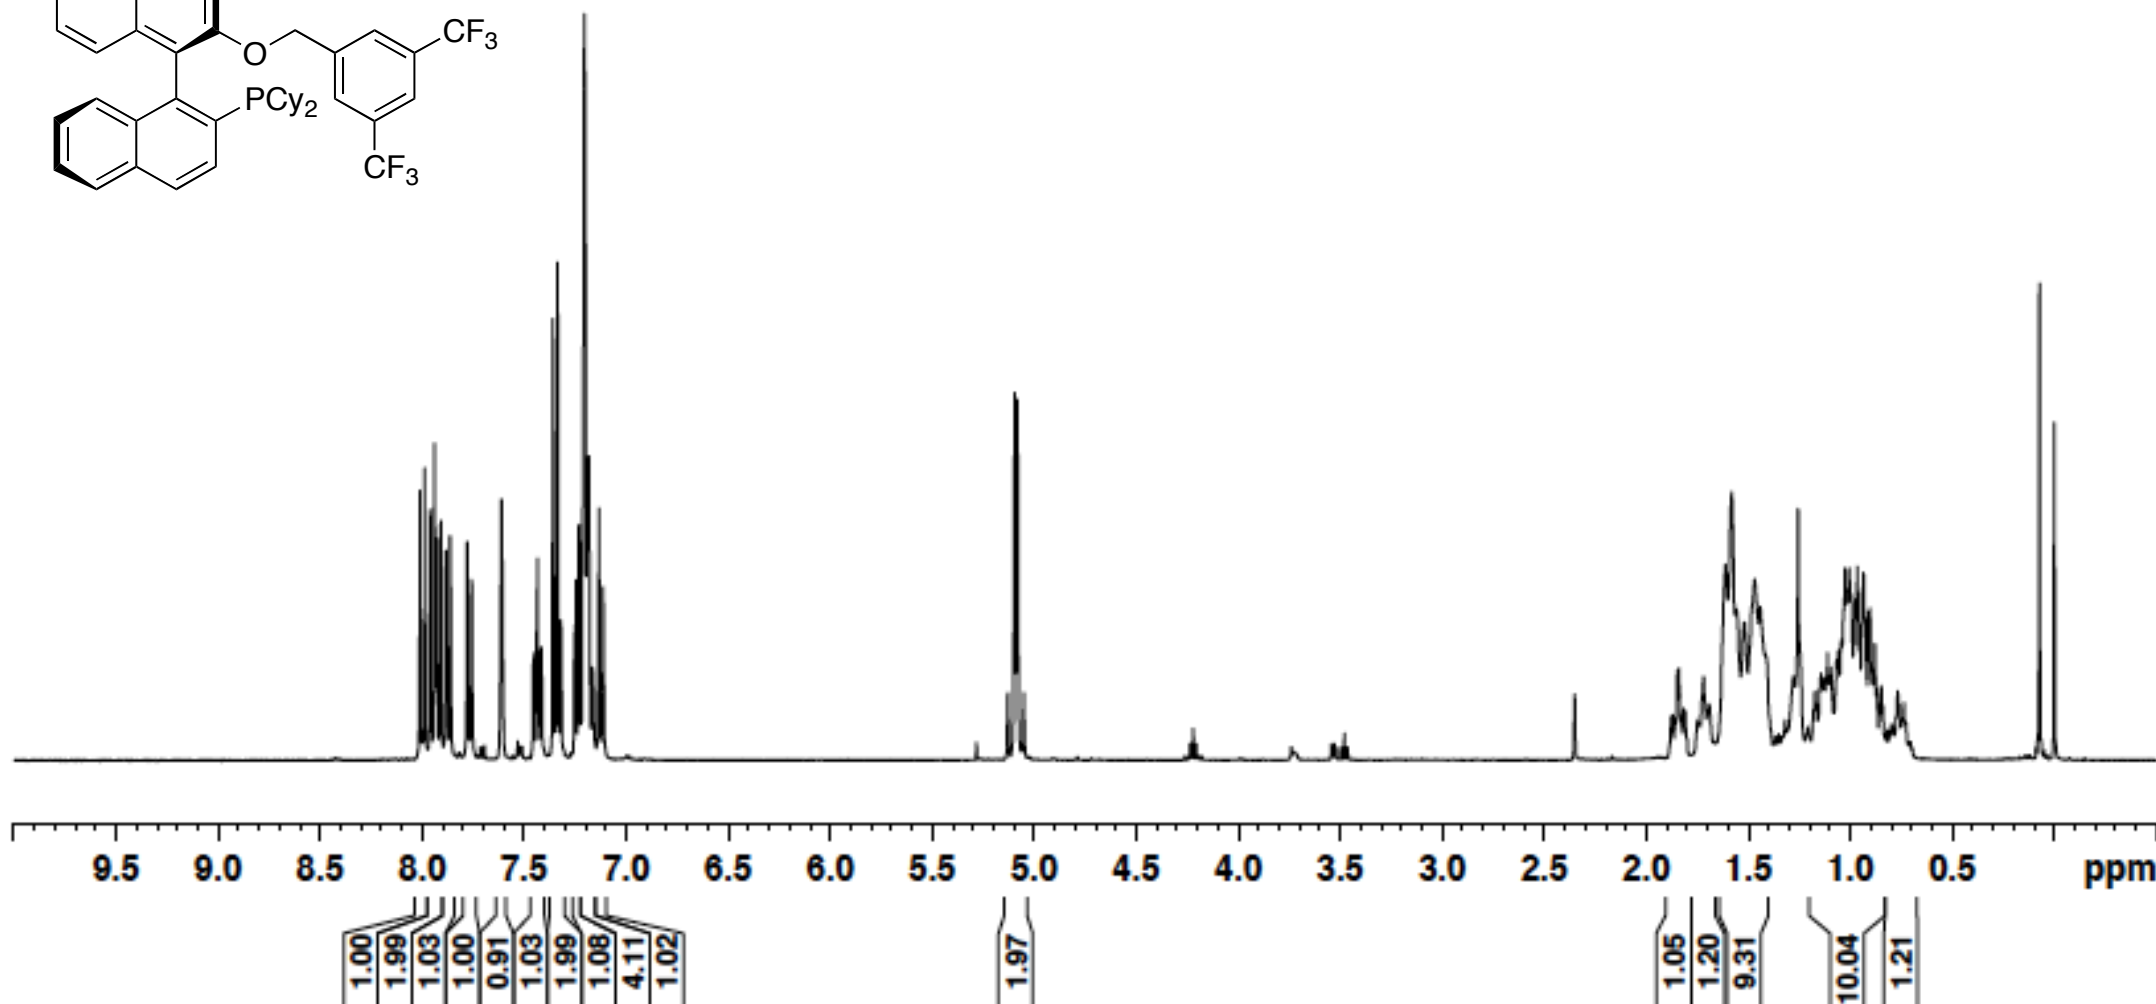

JF12-019,31P, CDCl3  
BBFO1 400MHz,  
2013, 09, Dec

S43

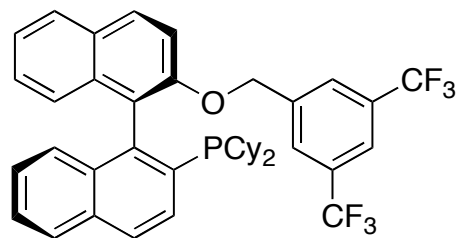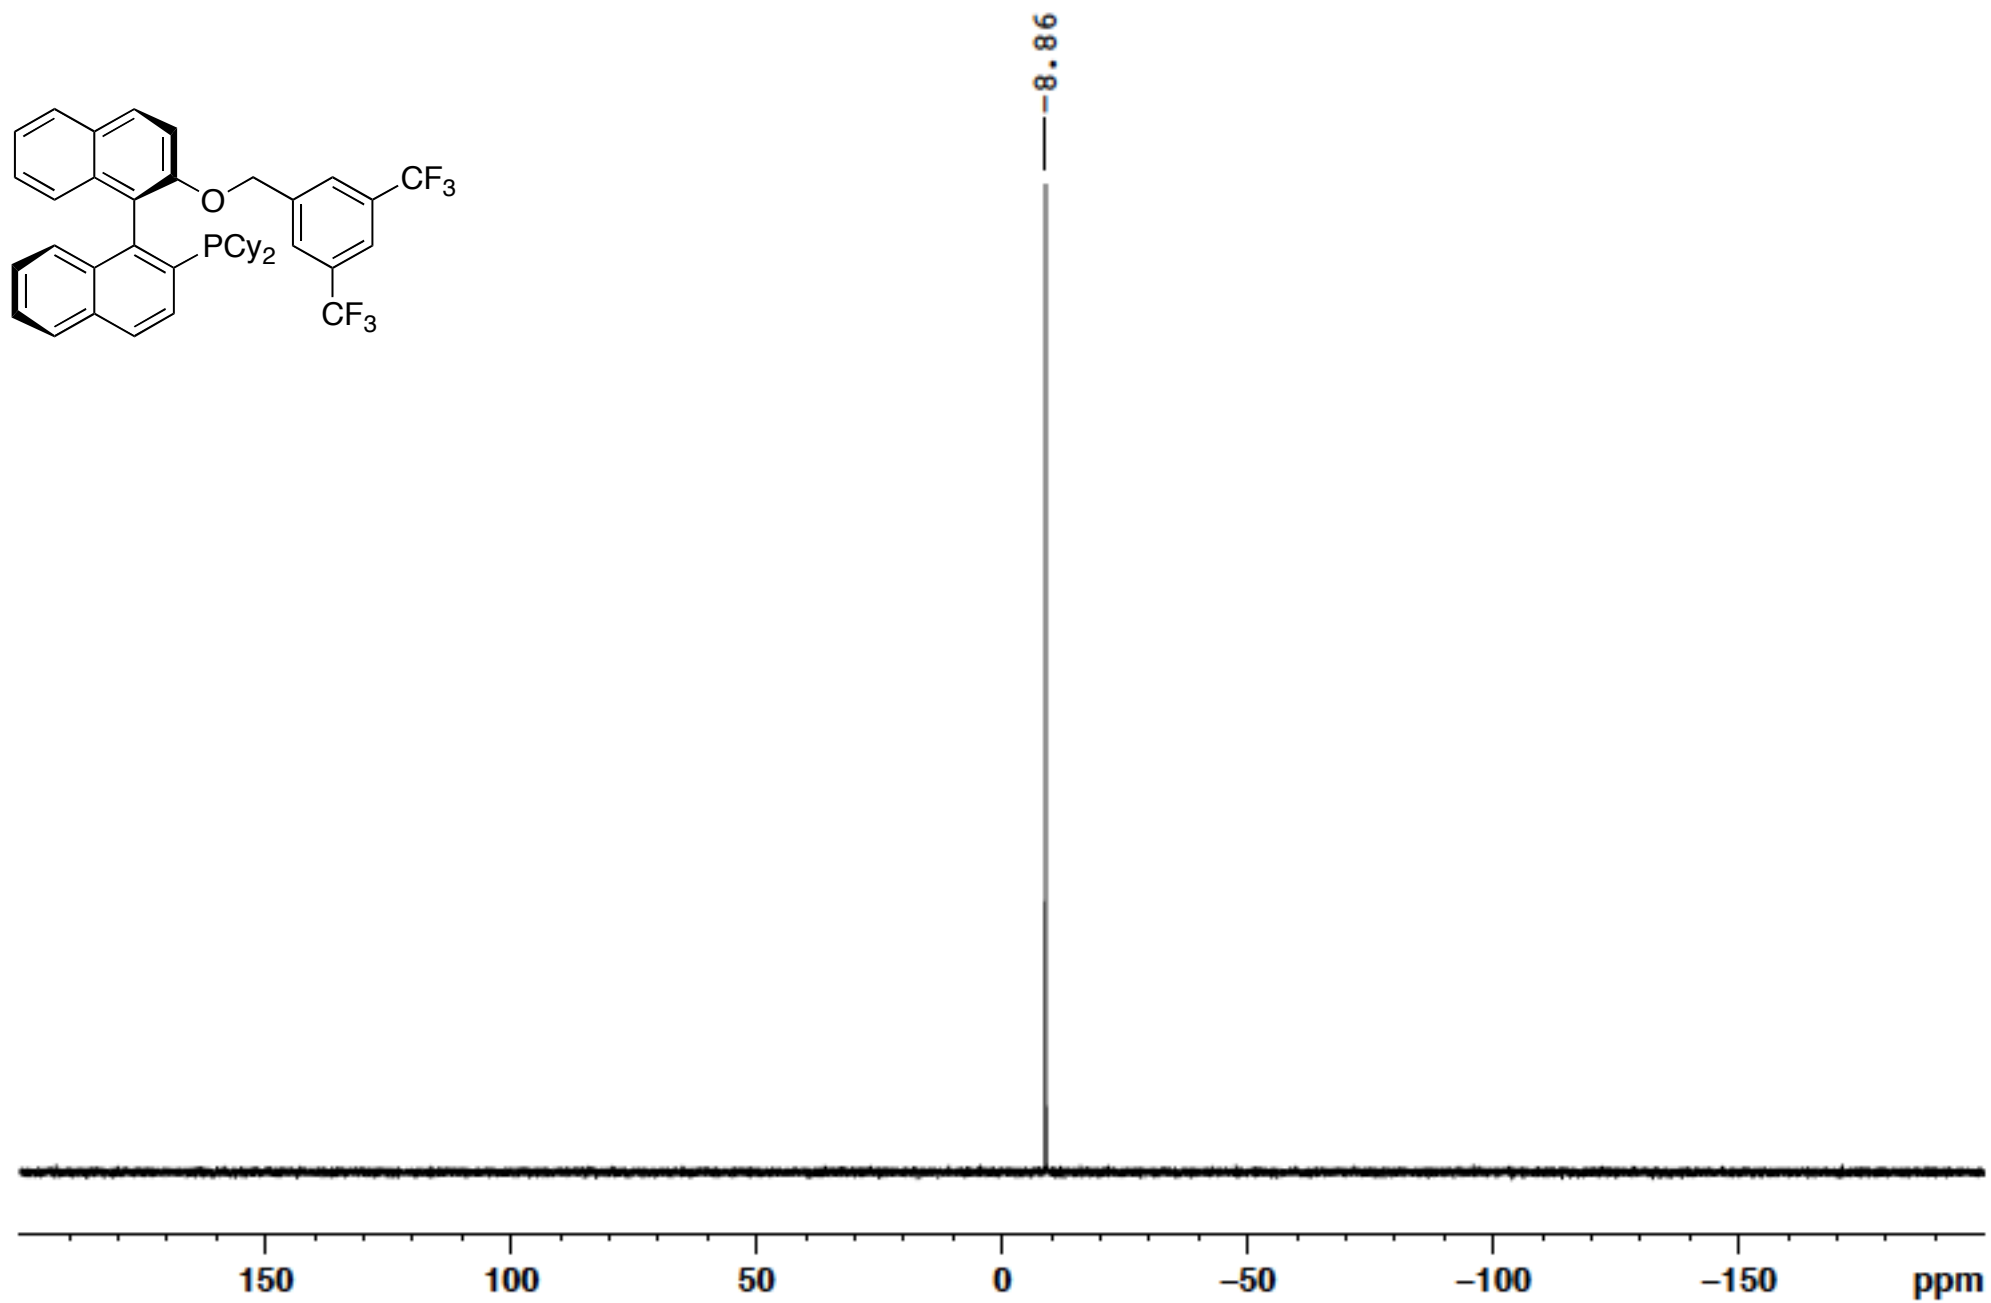

JF12-019,19F, CDCl3  
BBFO1 400MHz,  
2013, 09, Dec

S44



---63.02

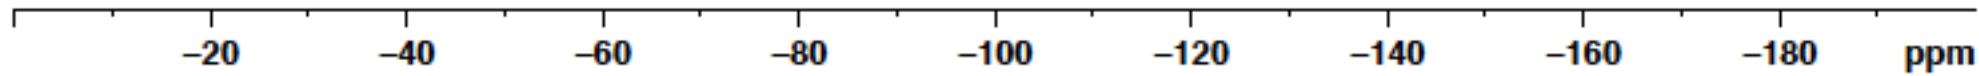

JF-L12 CNMR  
BBFO1 400M  
2014-01-25

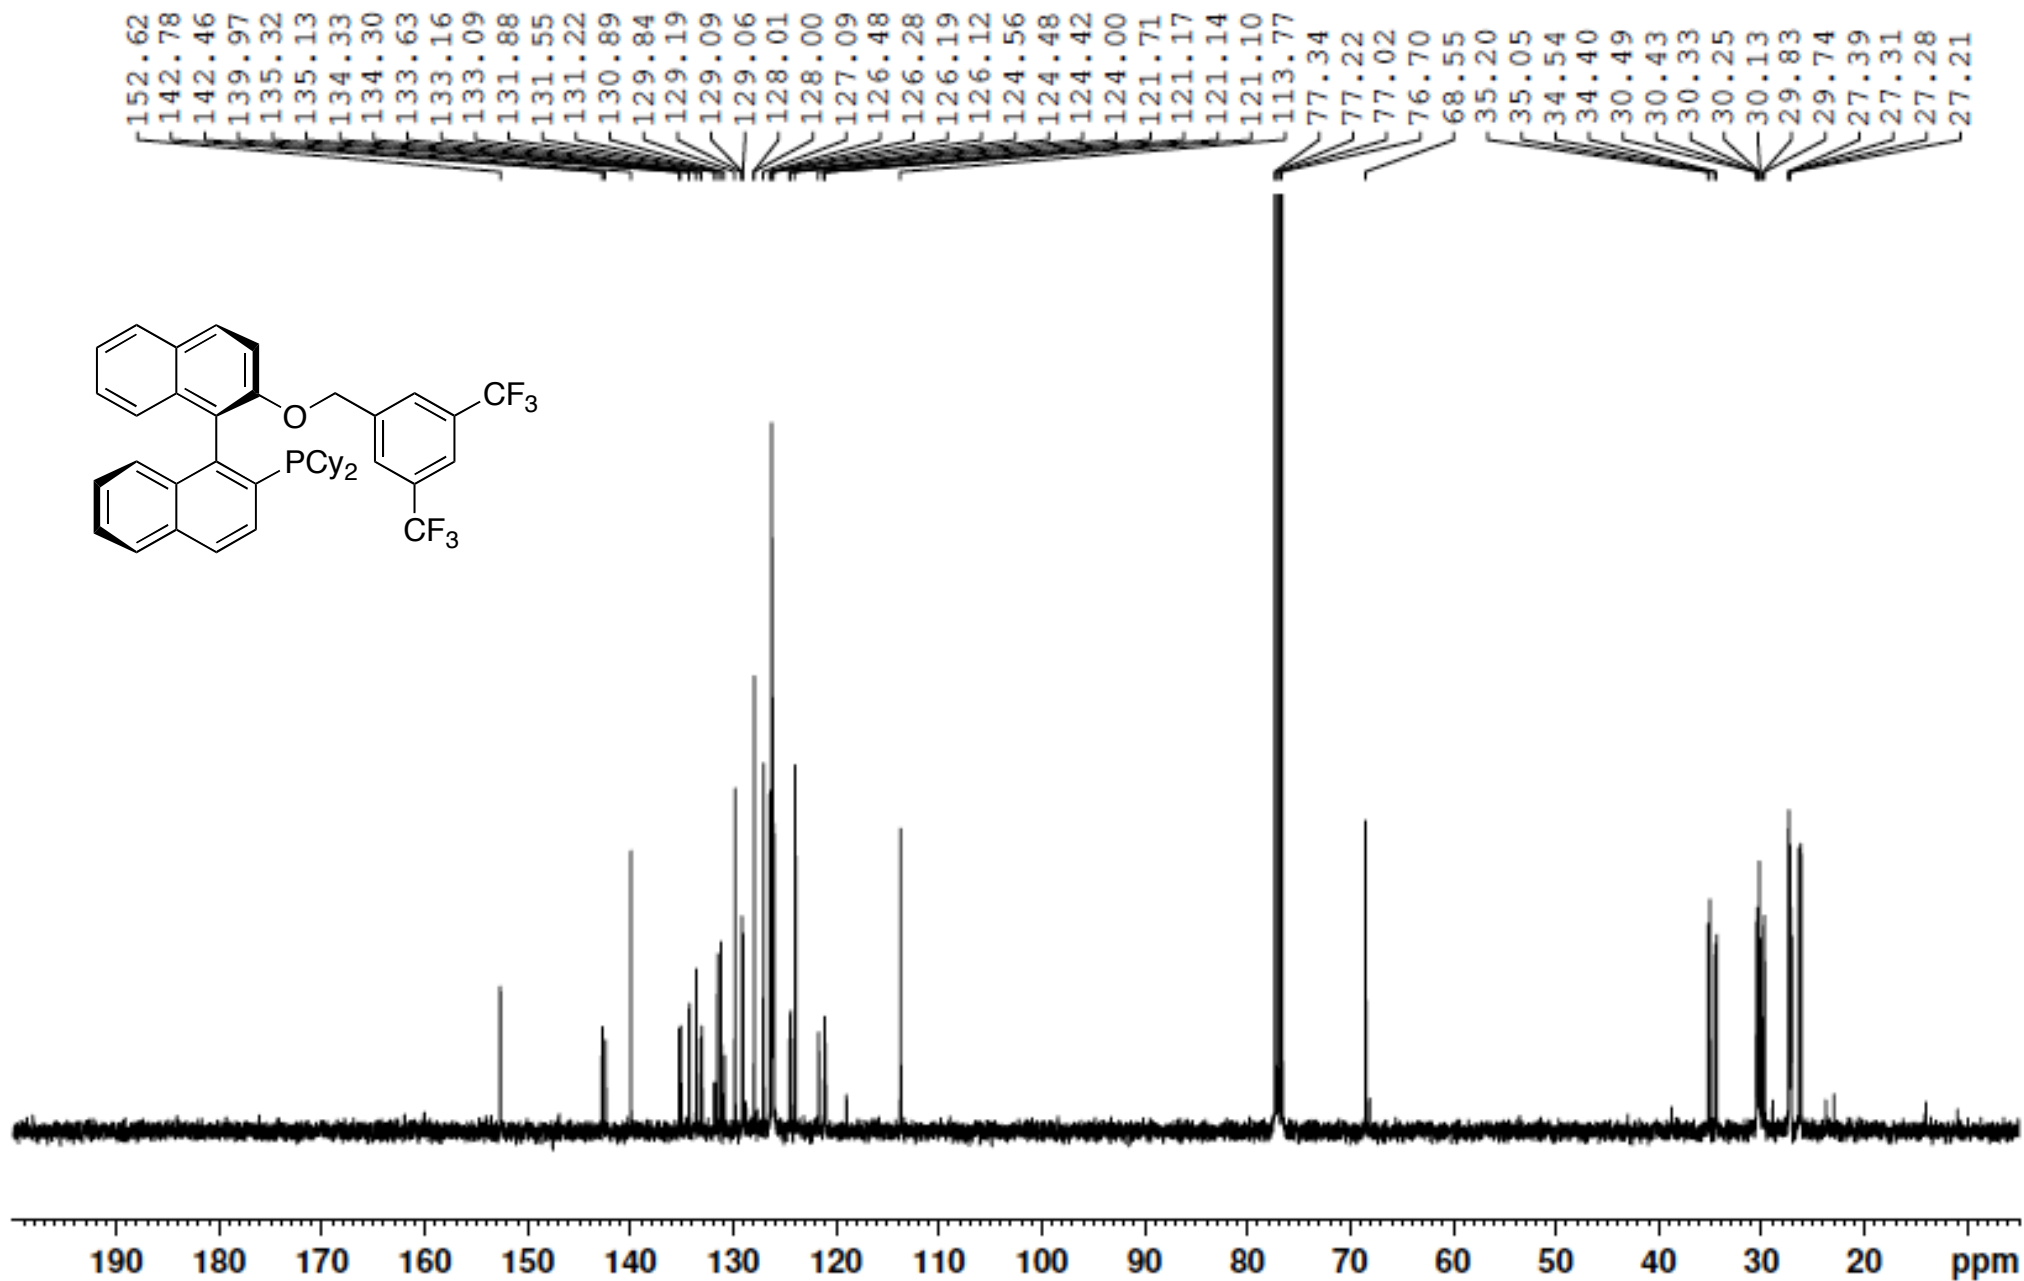

JF11-53-6 CDCl<sub>3</sub> 1HNMR BBFO2  
2013-08-02

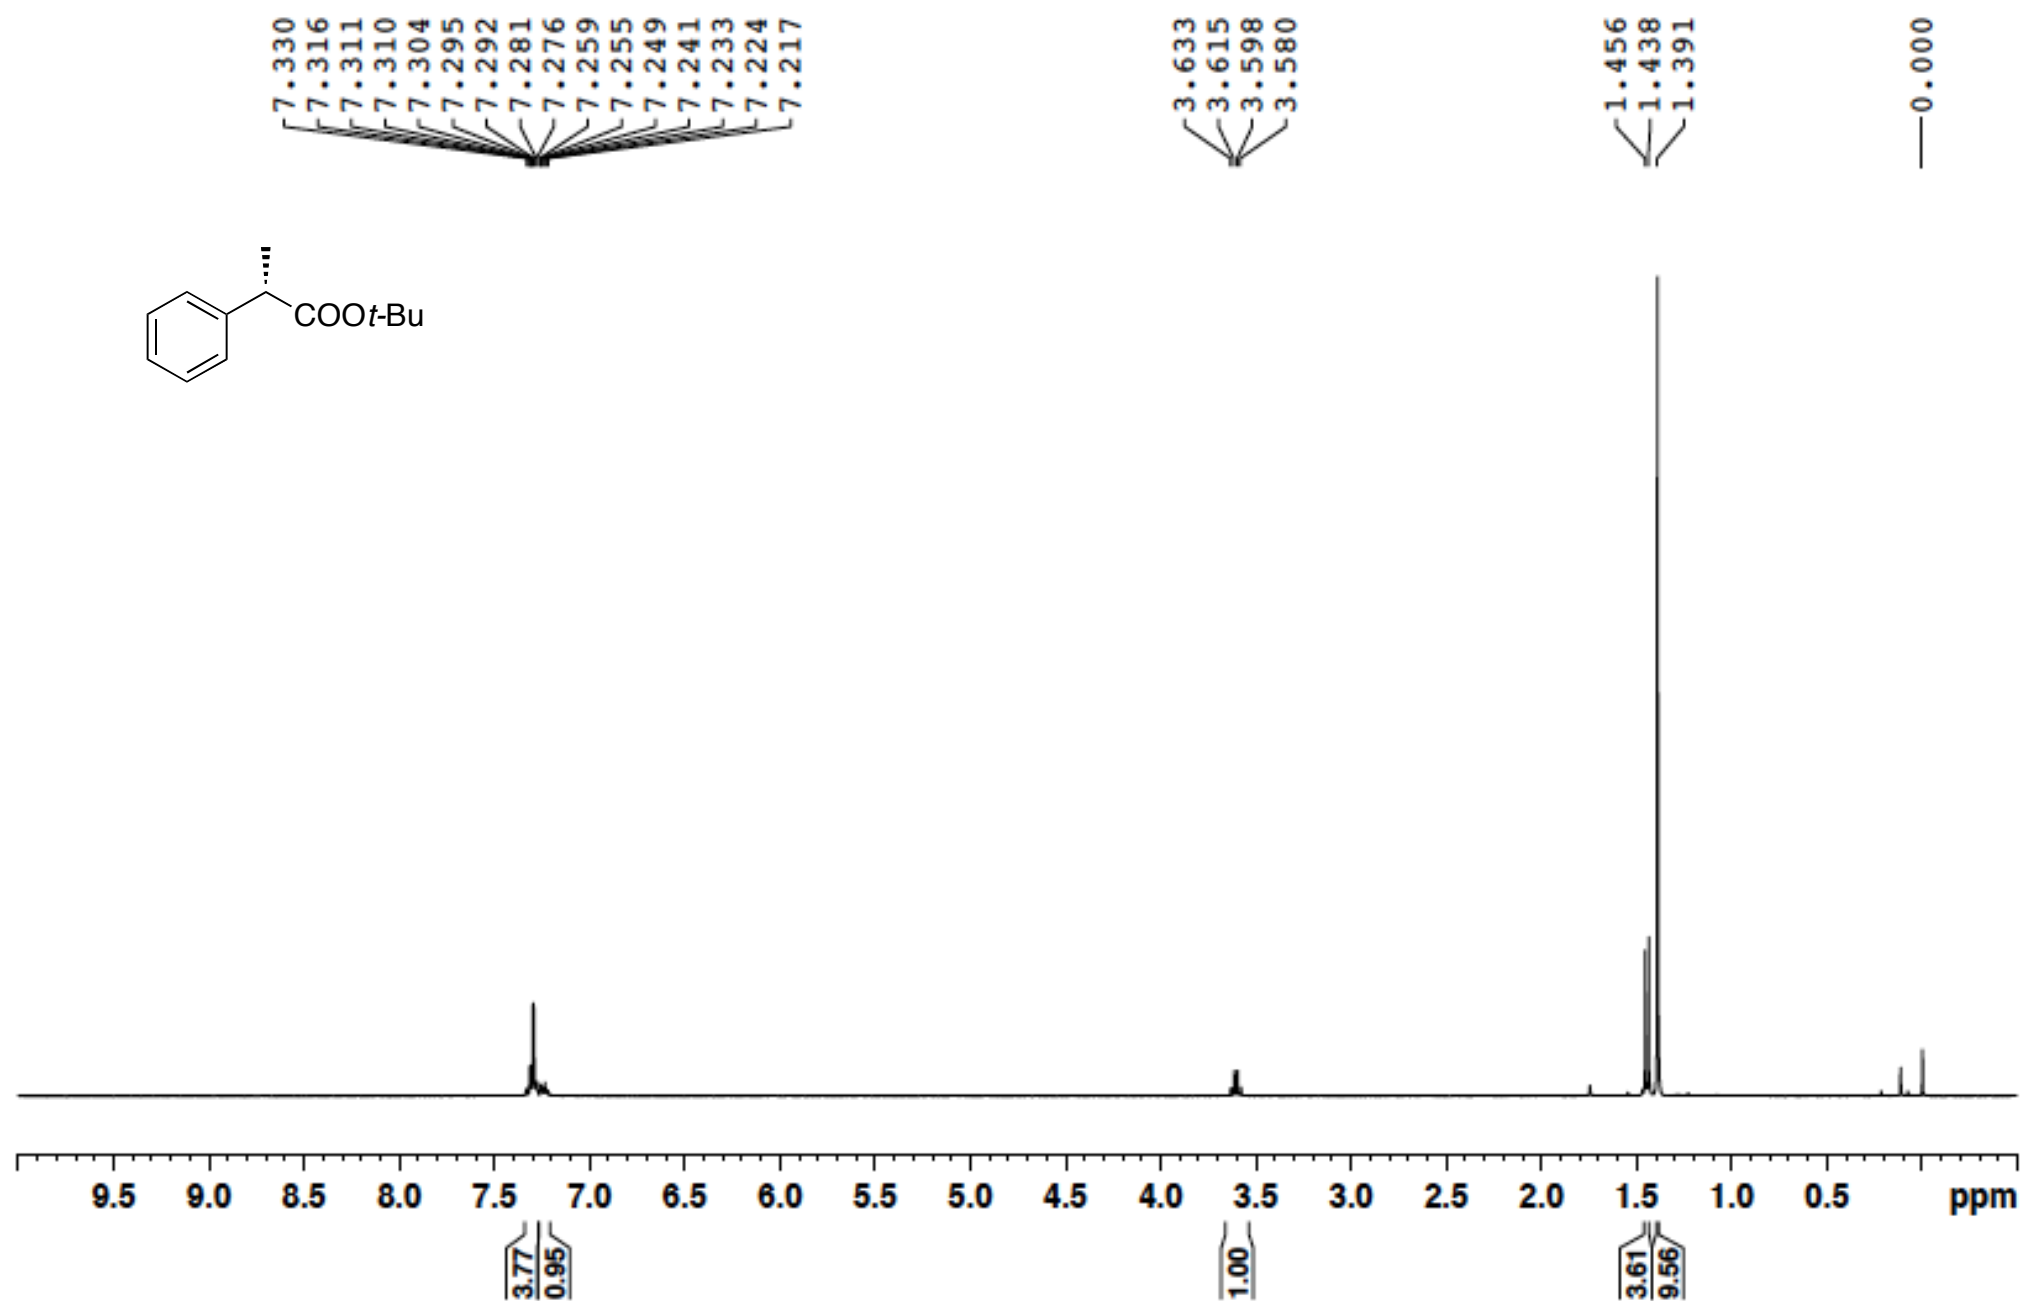

JF11-36-7, HNMR, CDCl<sub>3</sub> BBFO2  
2013-07-23

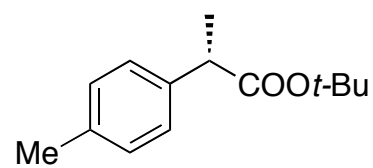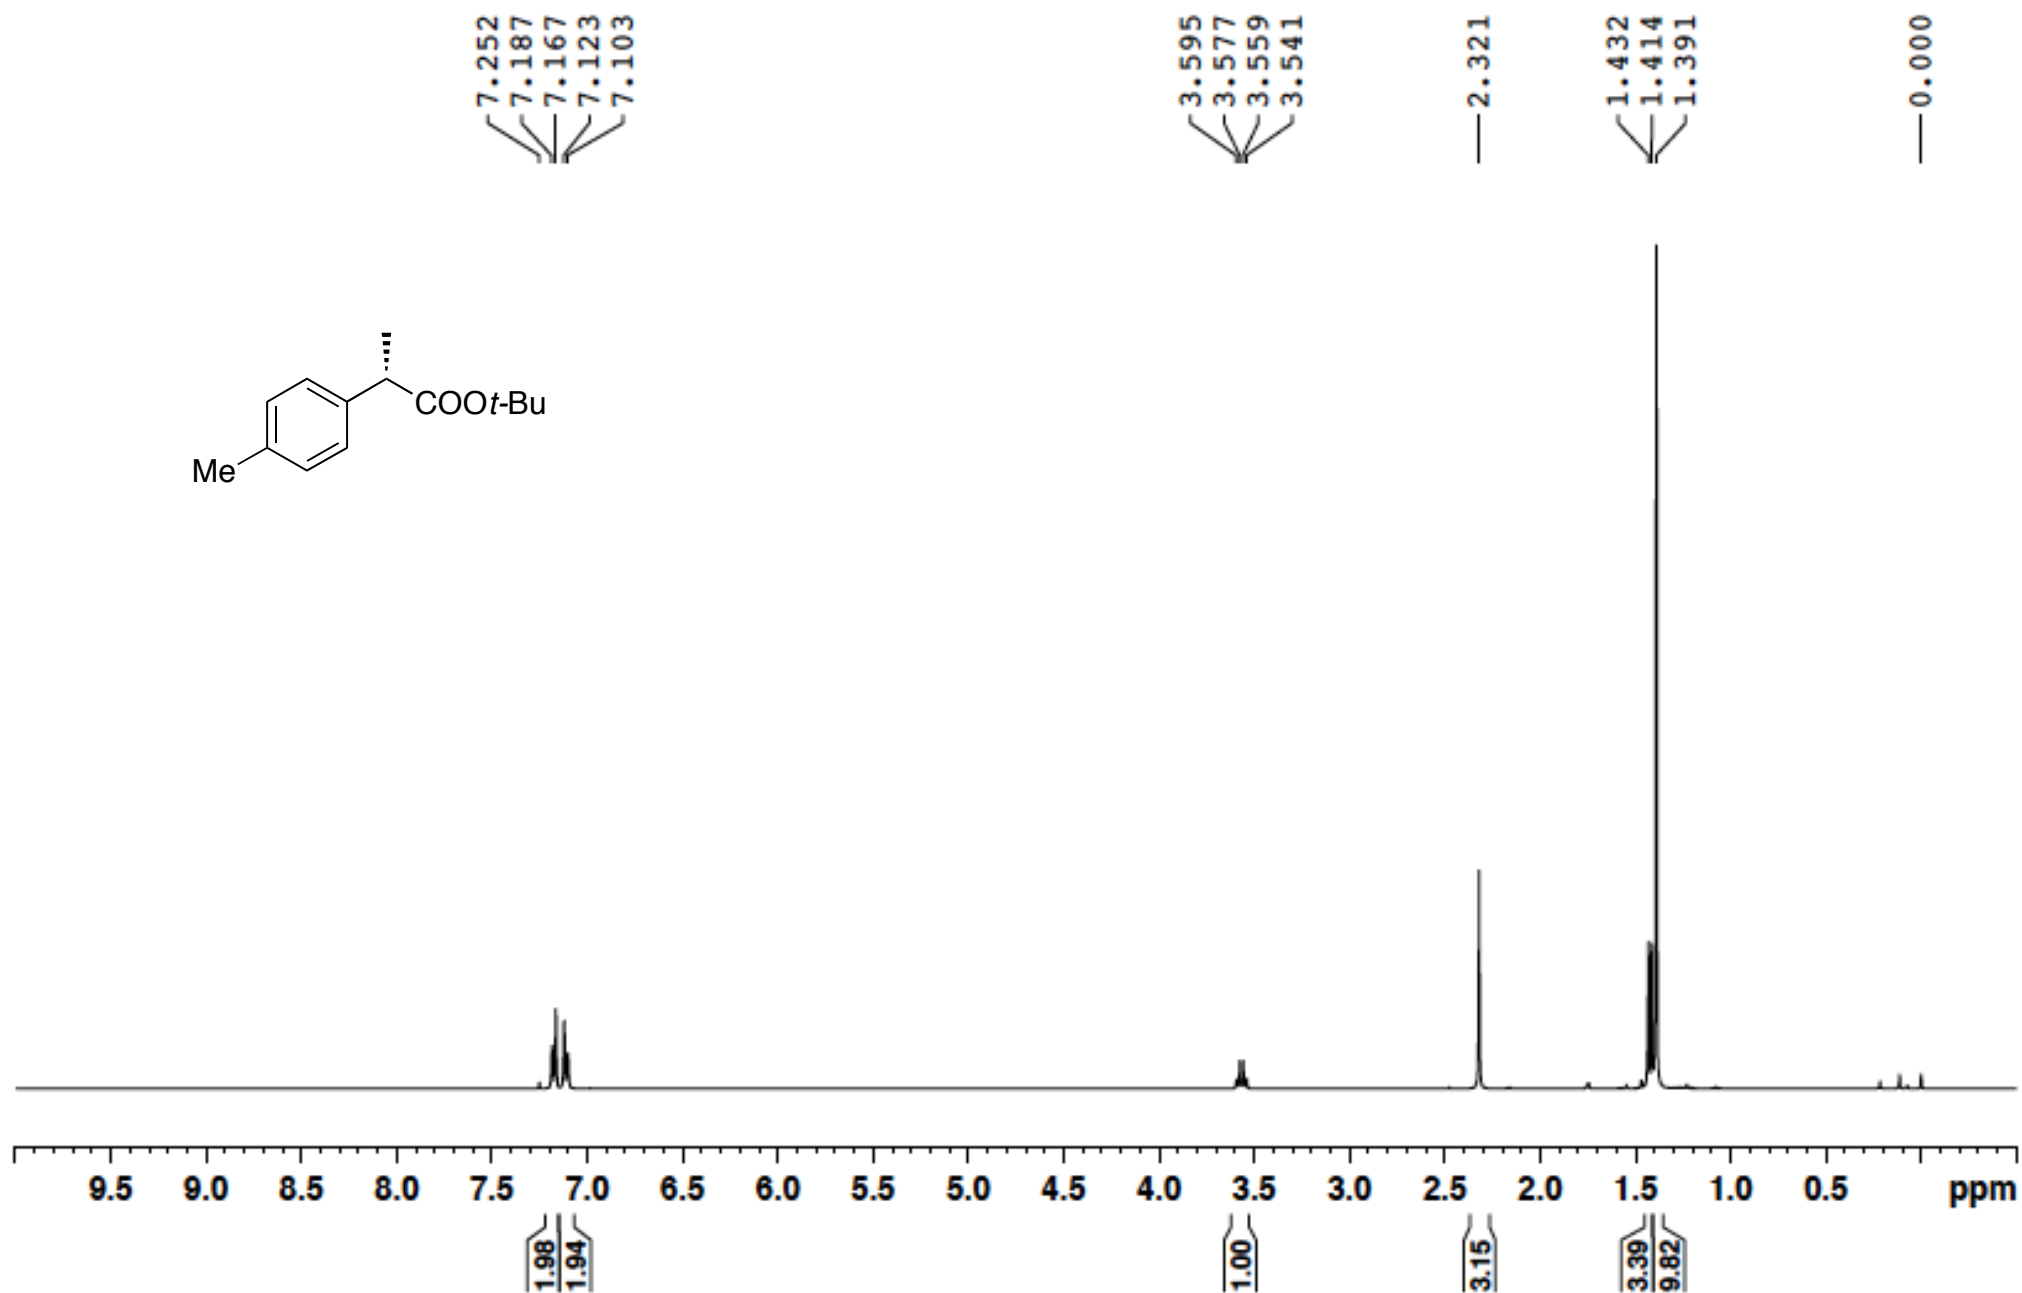

JF11-36-7 <sup>13</sup>CNMR, CDCl<sub>3</sub>, BBF01  
2013-07-23

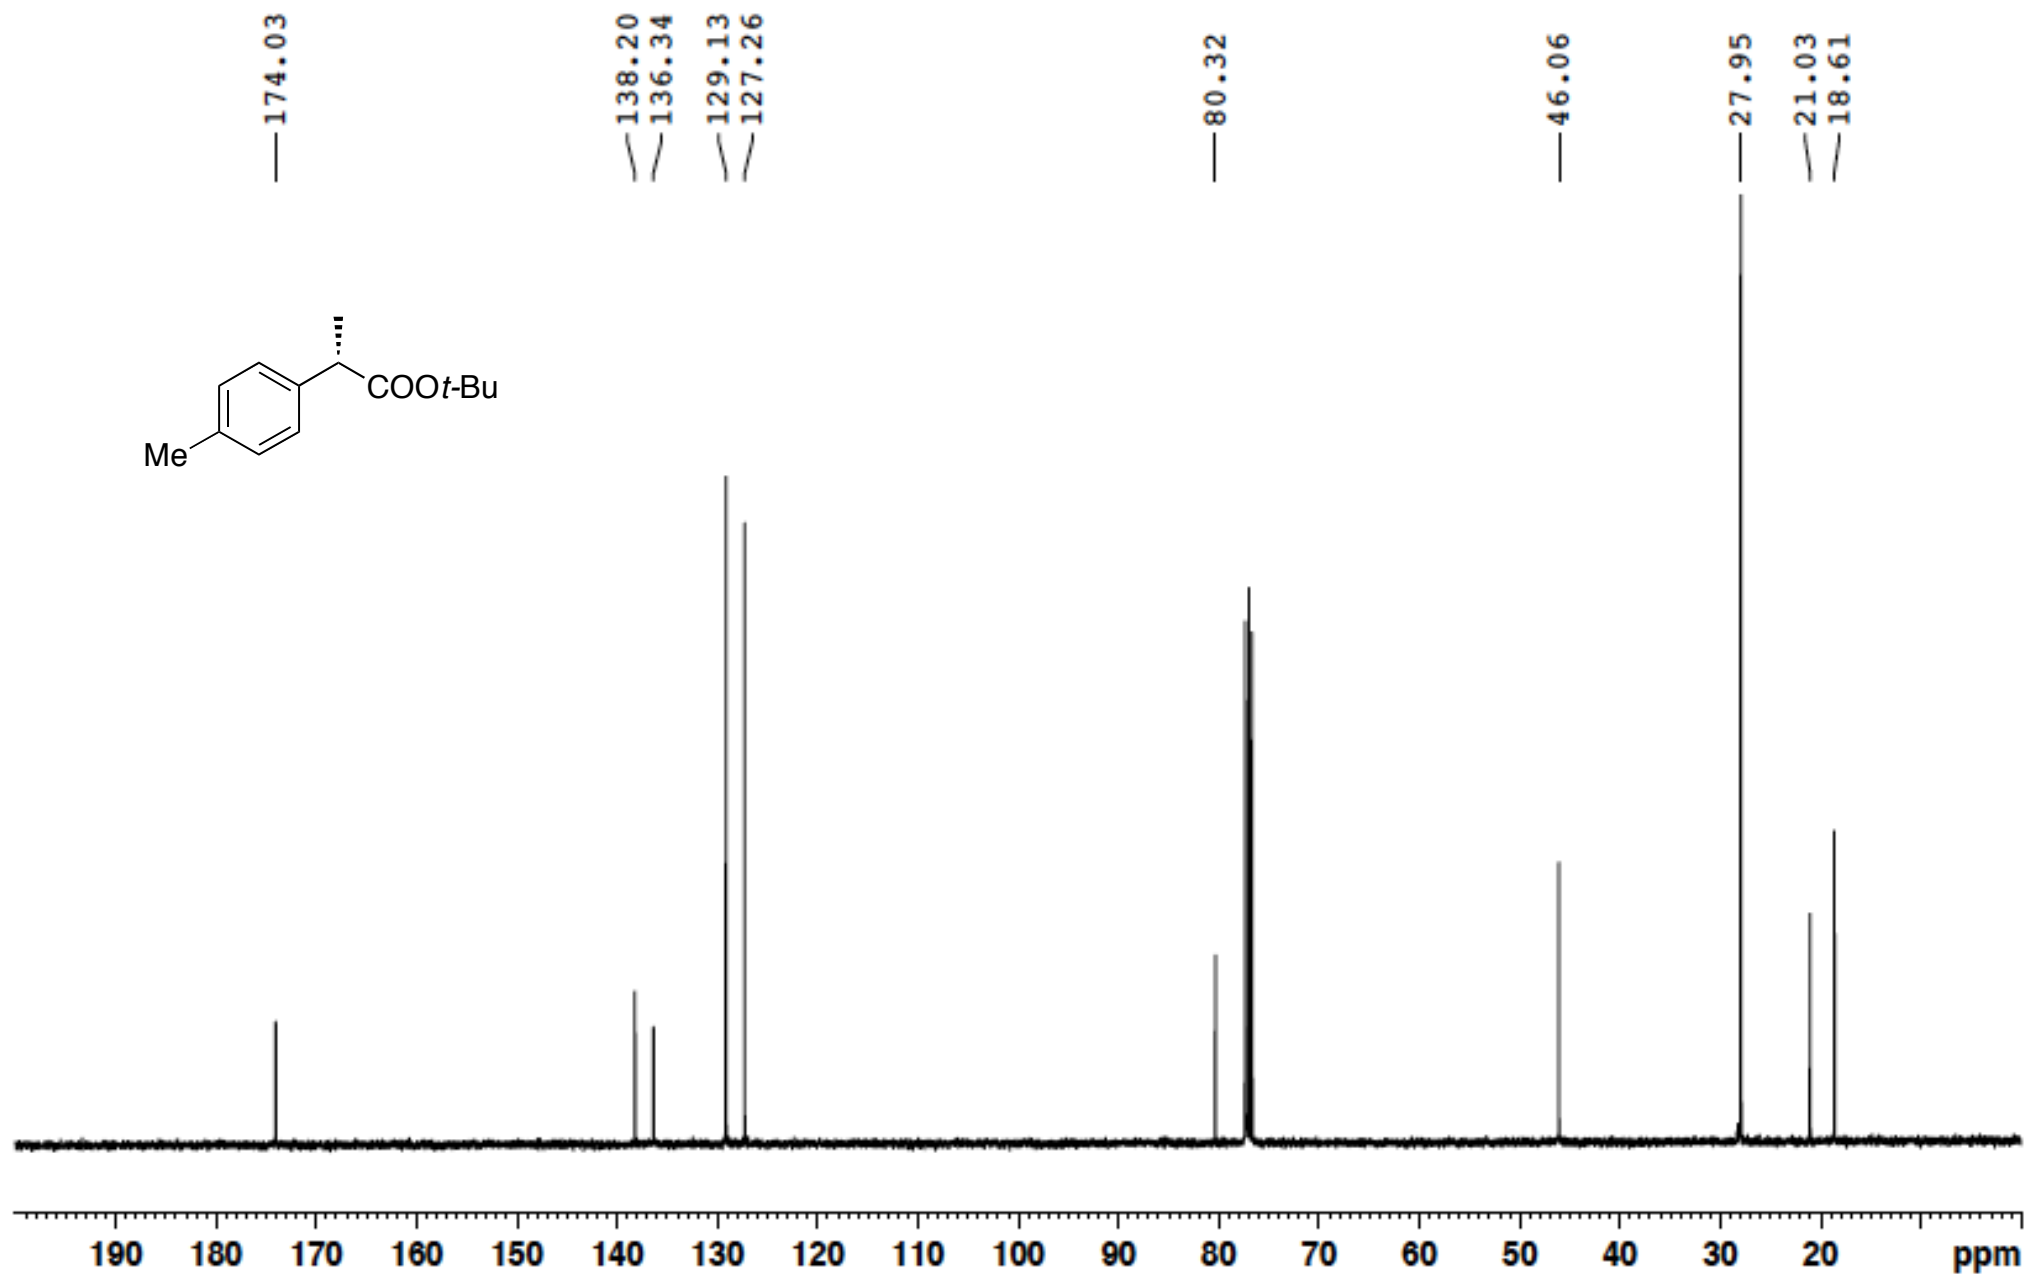



JF11-36-5, HNMR, CDCl<sub>3</sub> BFO2  
2013-07-21

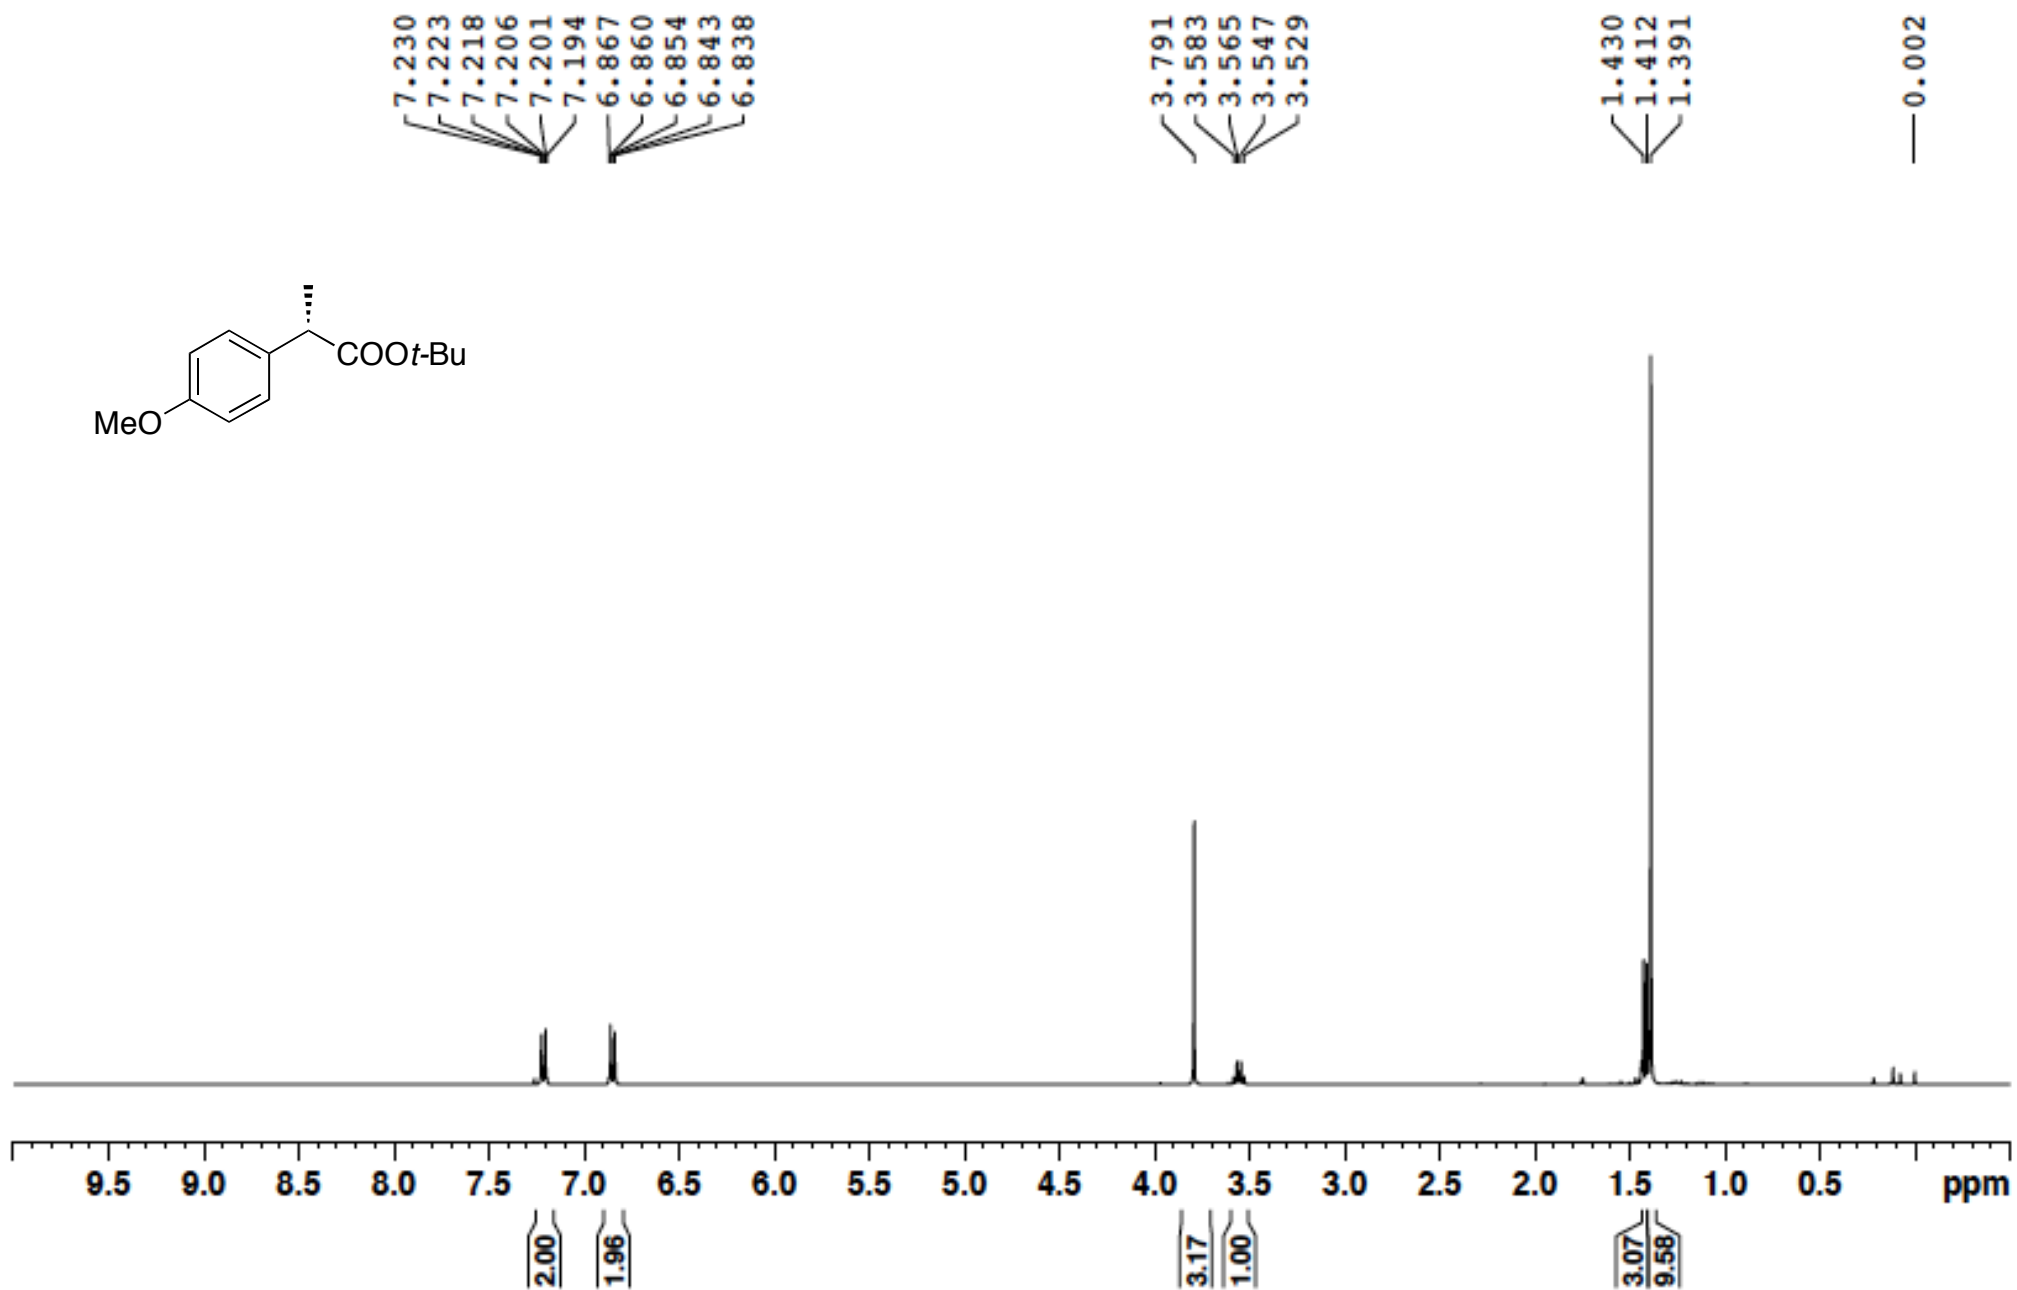

JF11-36-5 <sup>13</sup>CNMR, CDCl<sub>3</sub>, BBFO1  
2013-07-22

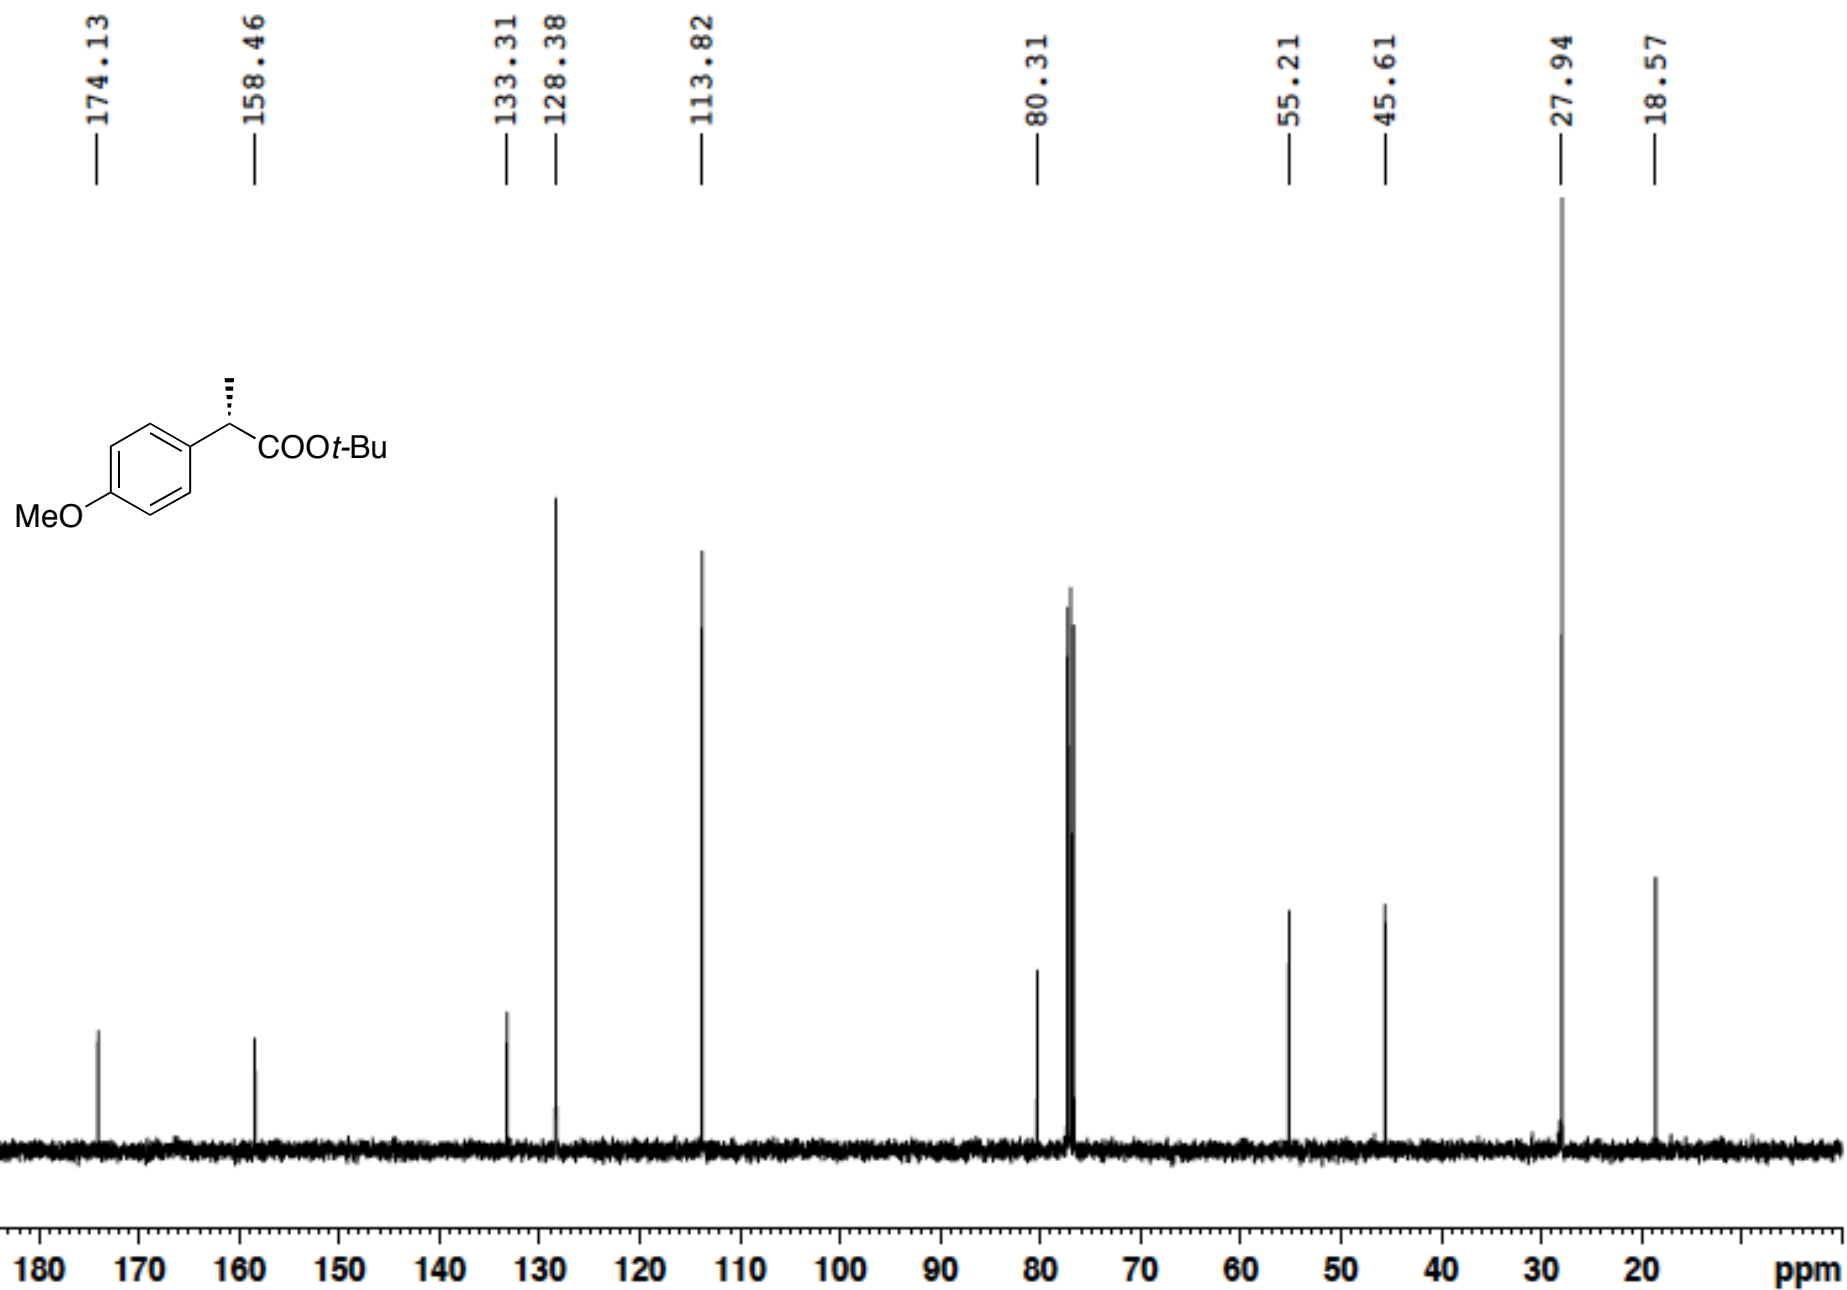

JF11-23-3, HNMR, CDCl<sub>3</sub> BBF02  
2013-07-05

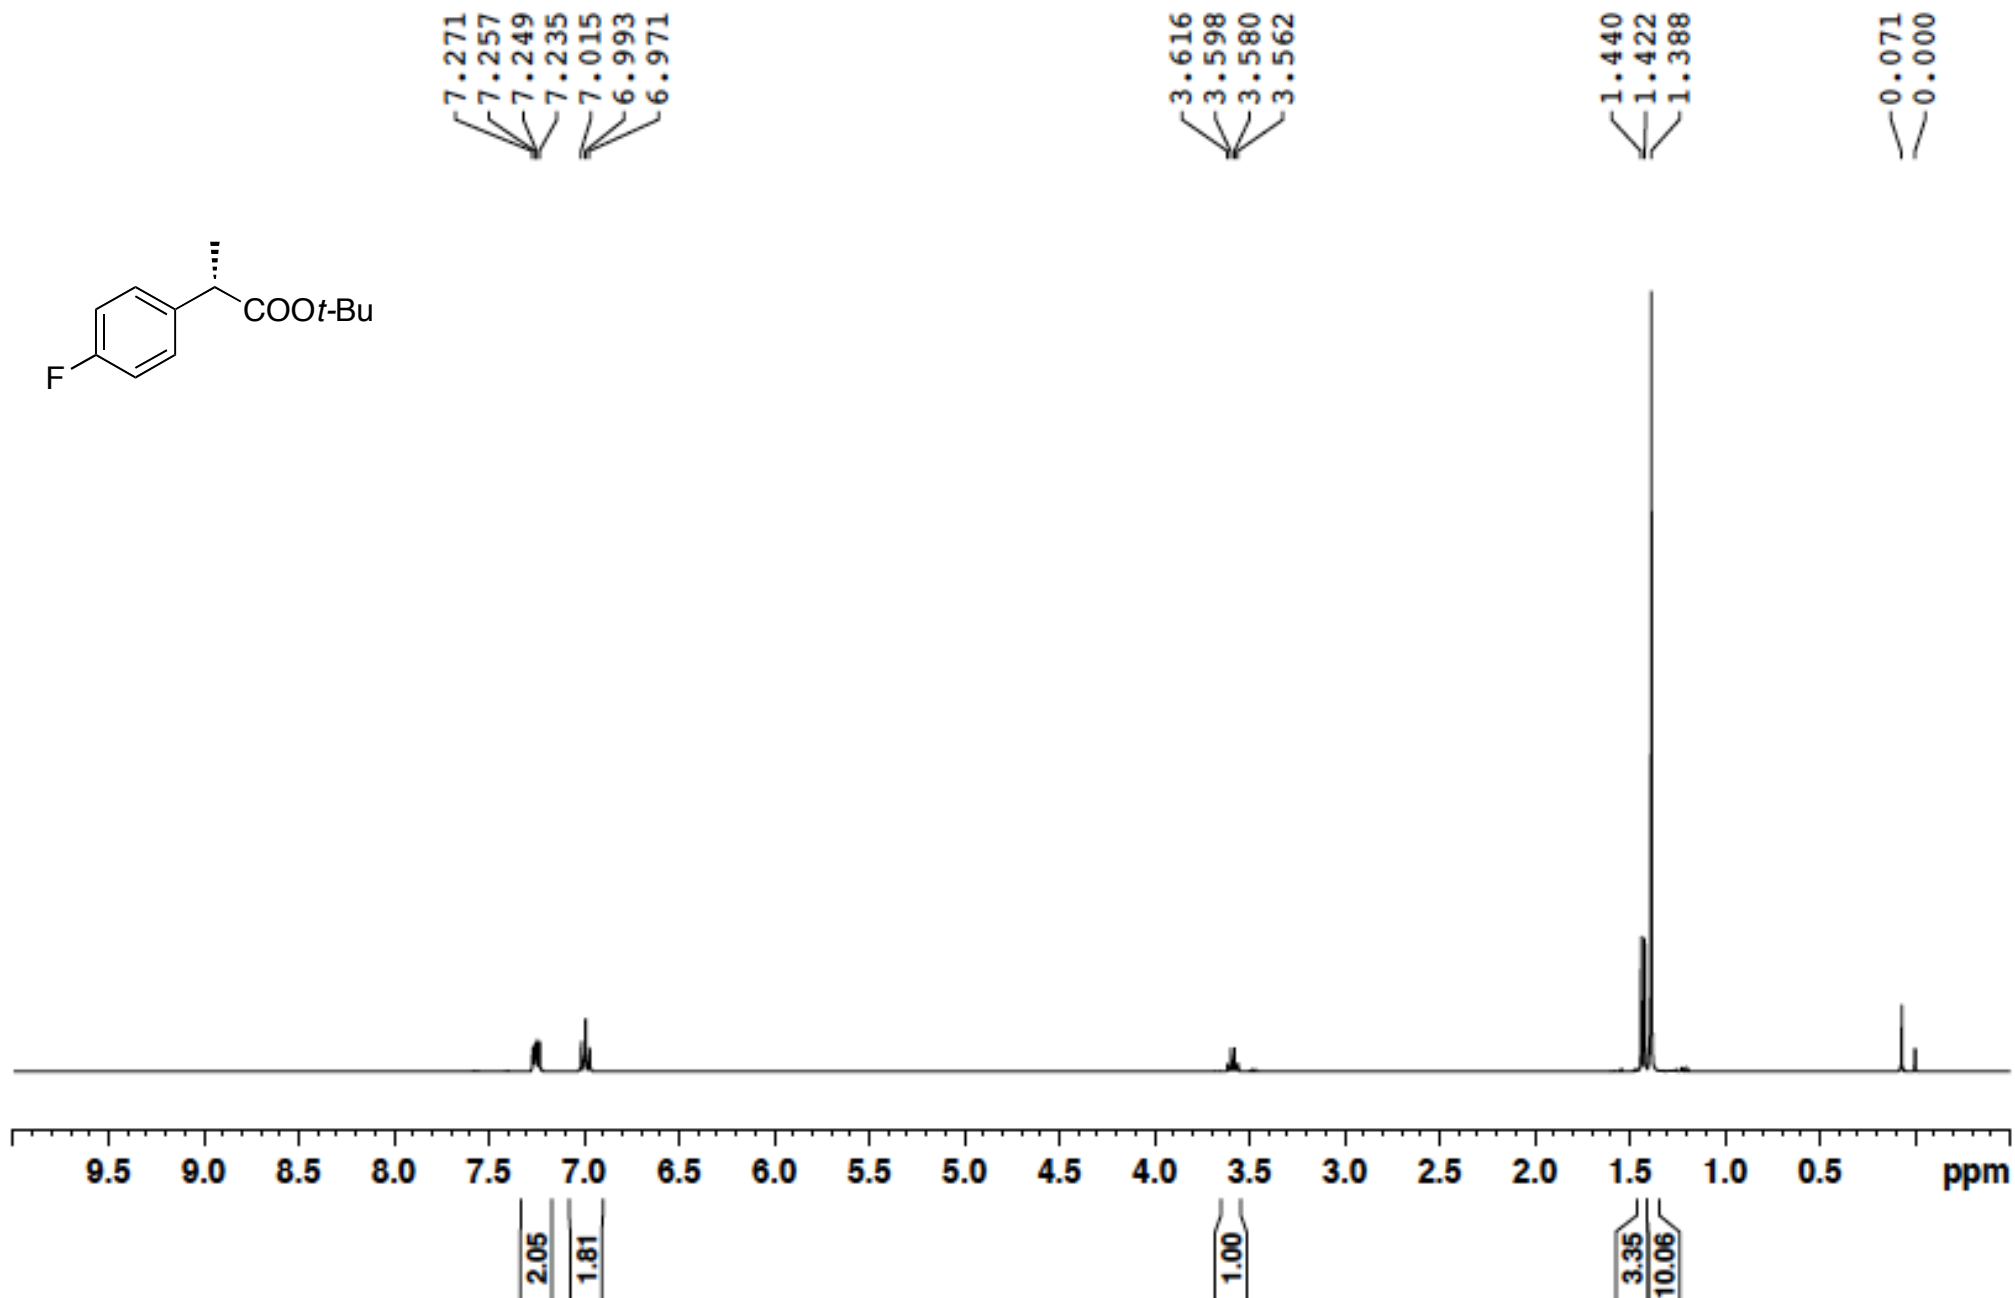

JF11-23-3,  $^{13}\text{C}$ NMR,  $\text{CDCl}_3$  BBFO2  
2013-07-05

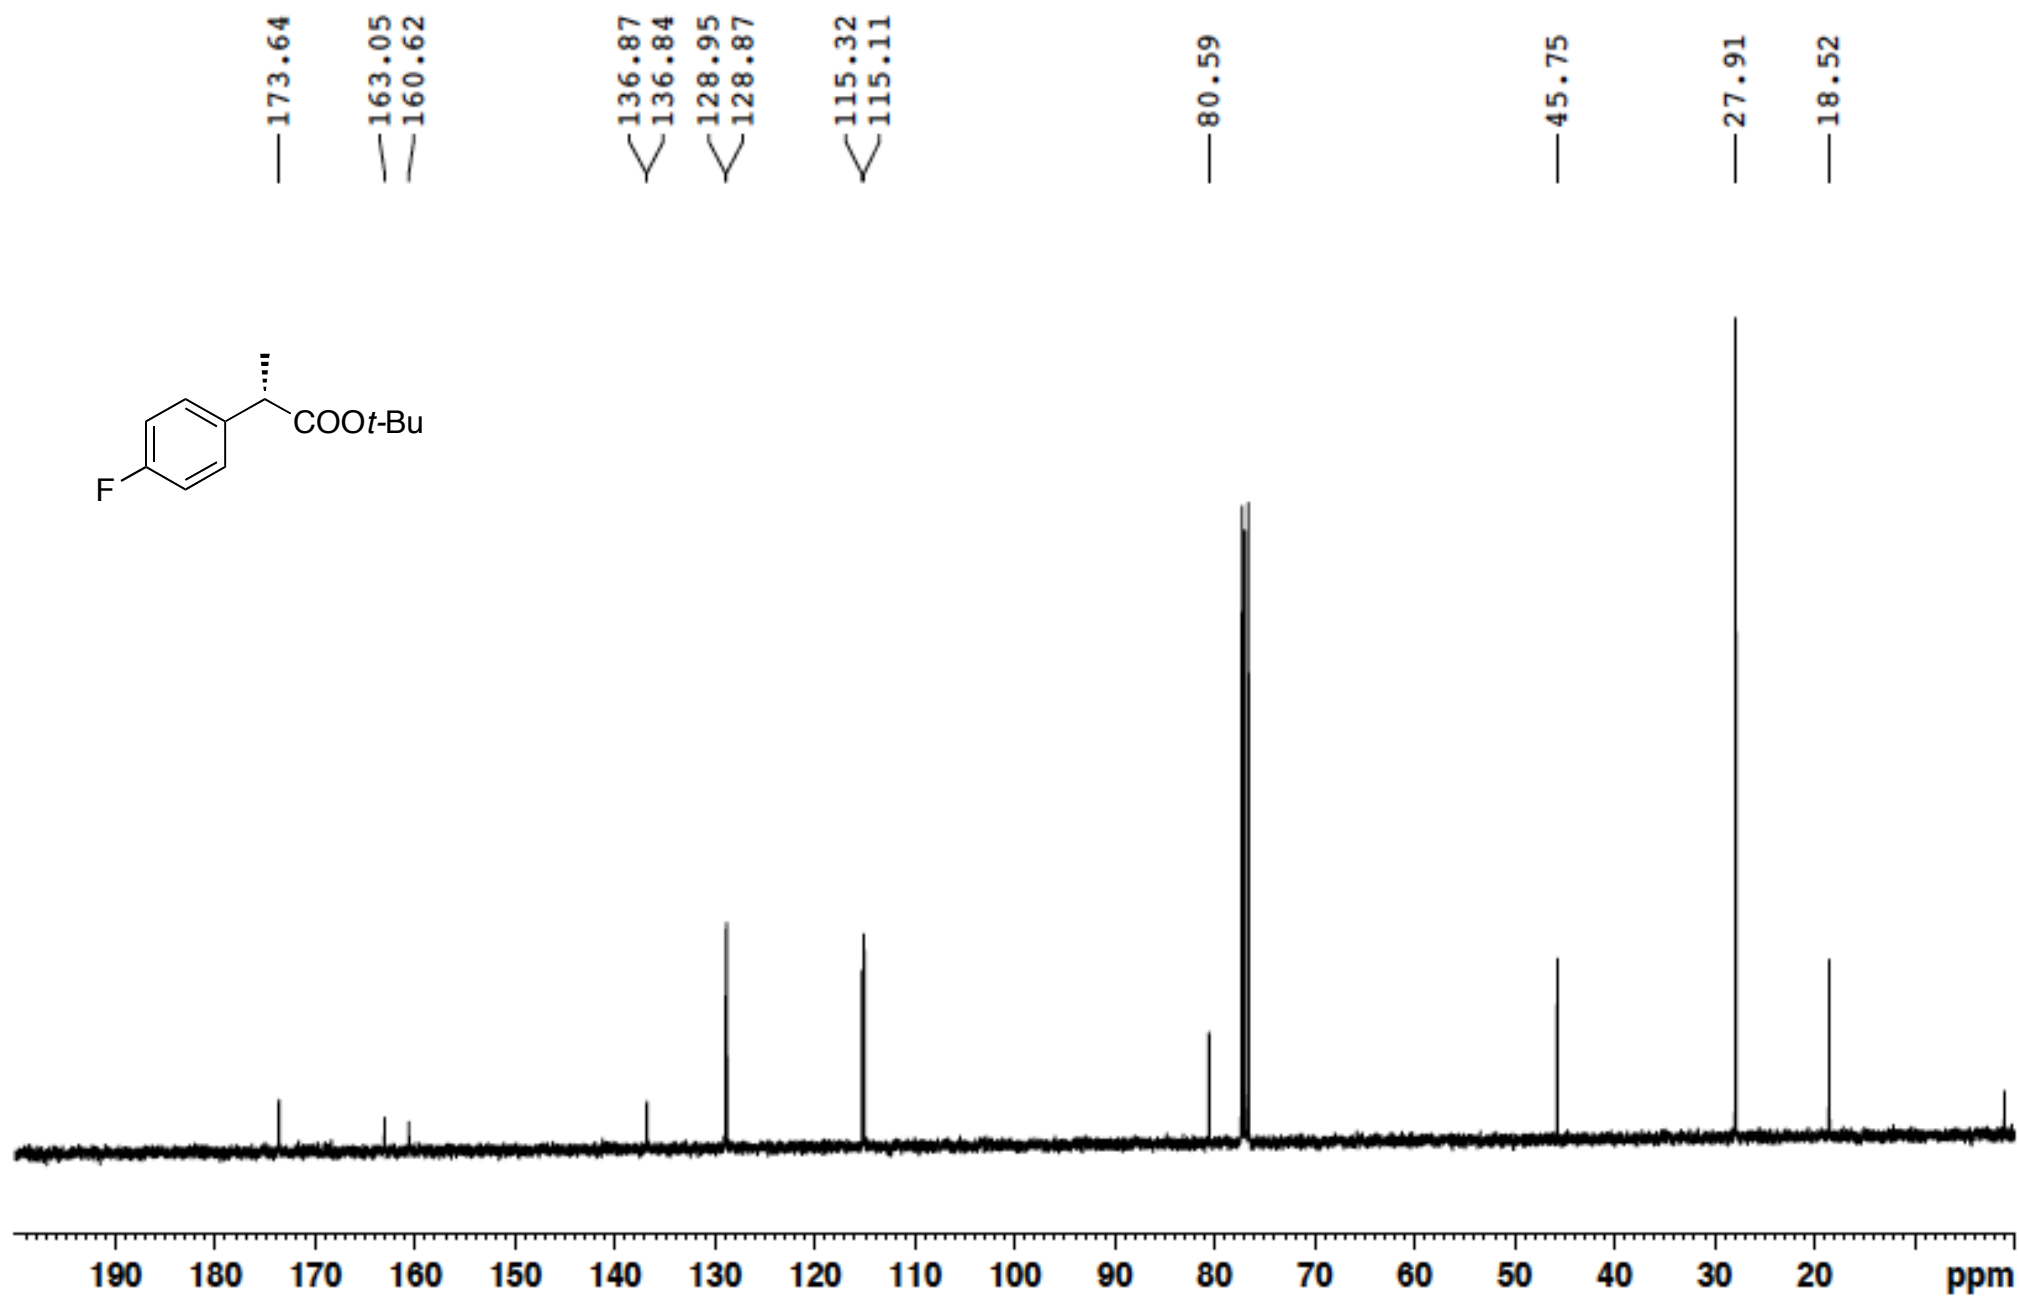

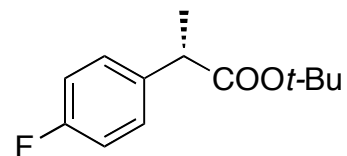

---116.29

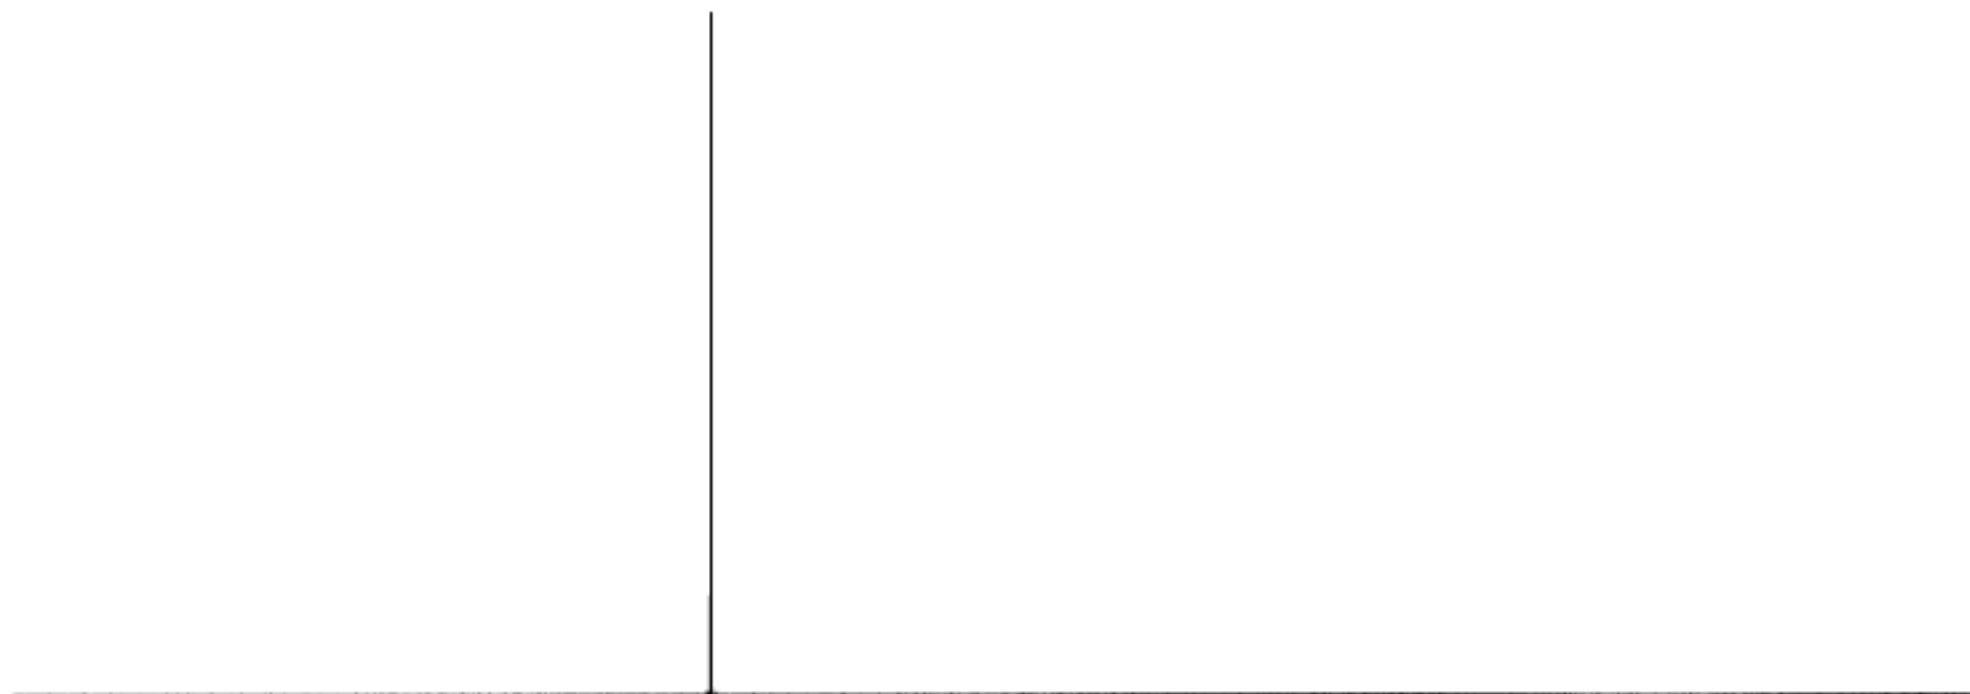

-80 -90 -100 -110 -120 -130 -140 -150 -160 -170 -180 -190 ppm

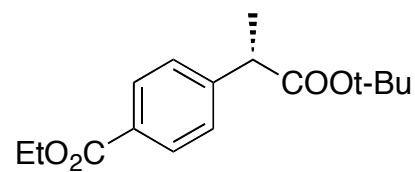

8.003  
7.998  
7.987  
7.982  
7.366  
7.362  
7.345  
7.262

4.396  
4.379  
4.361  
4.343  
3.692  
3.674  
3.656  
3.639

1.469  
1.451  
1.406  
1.388  
1.383  
1.370

— 0.000

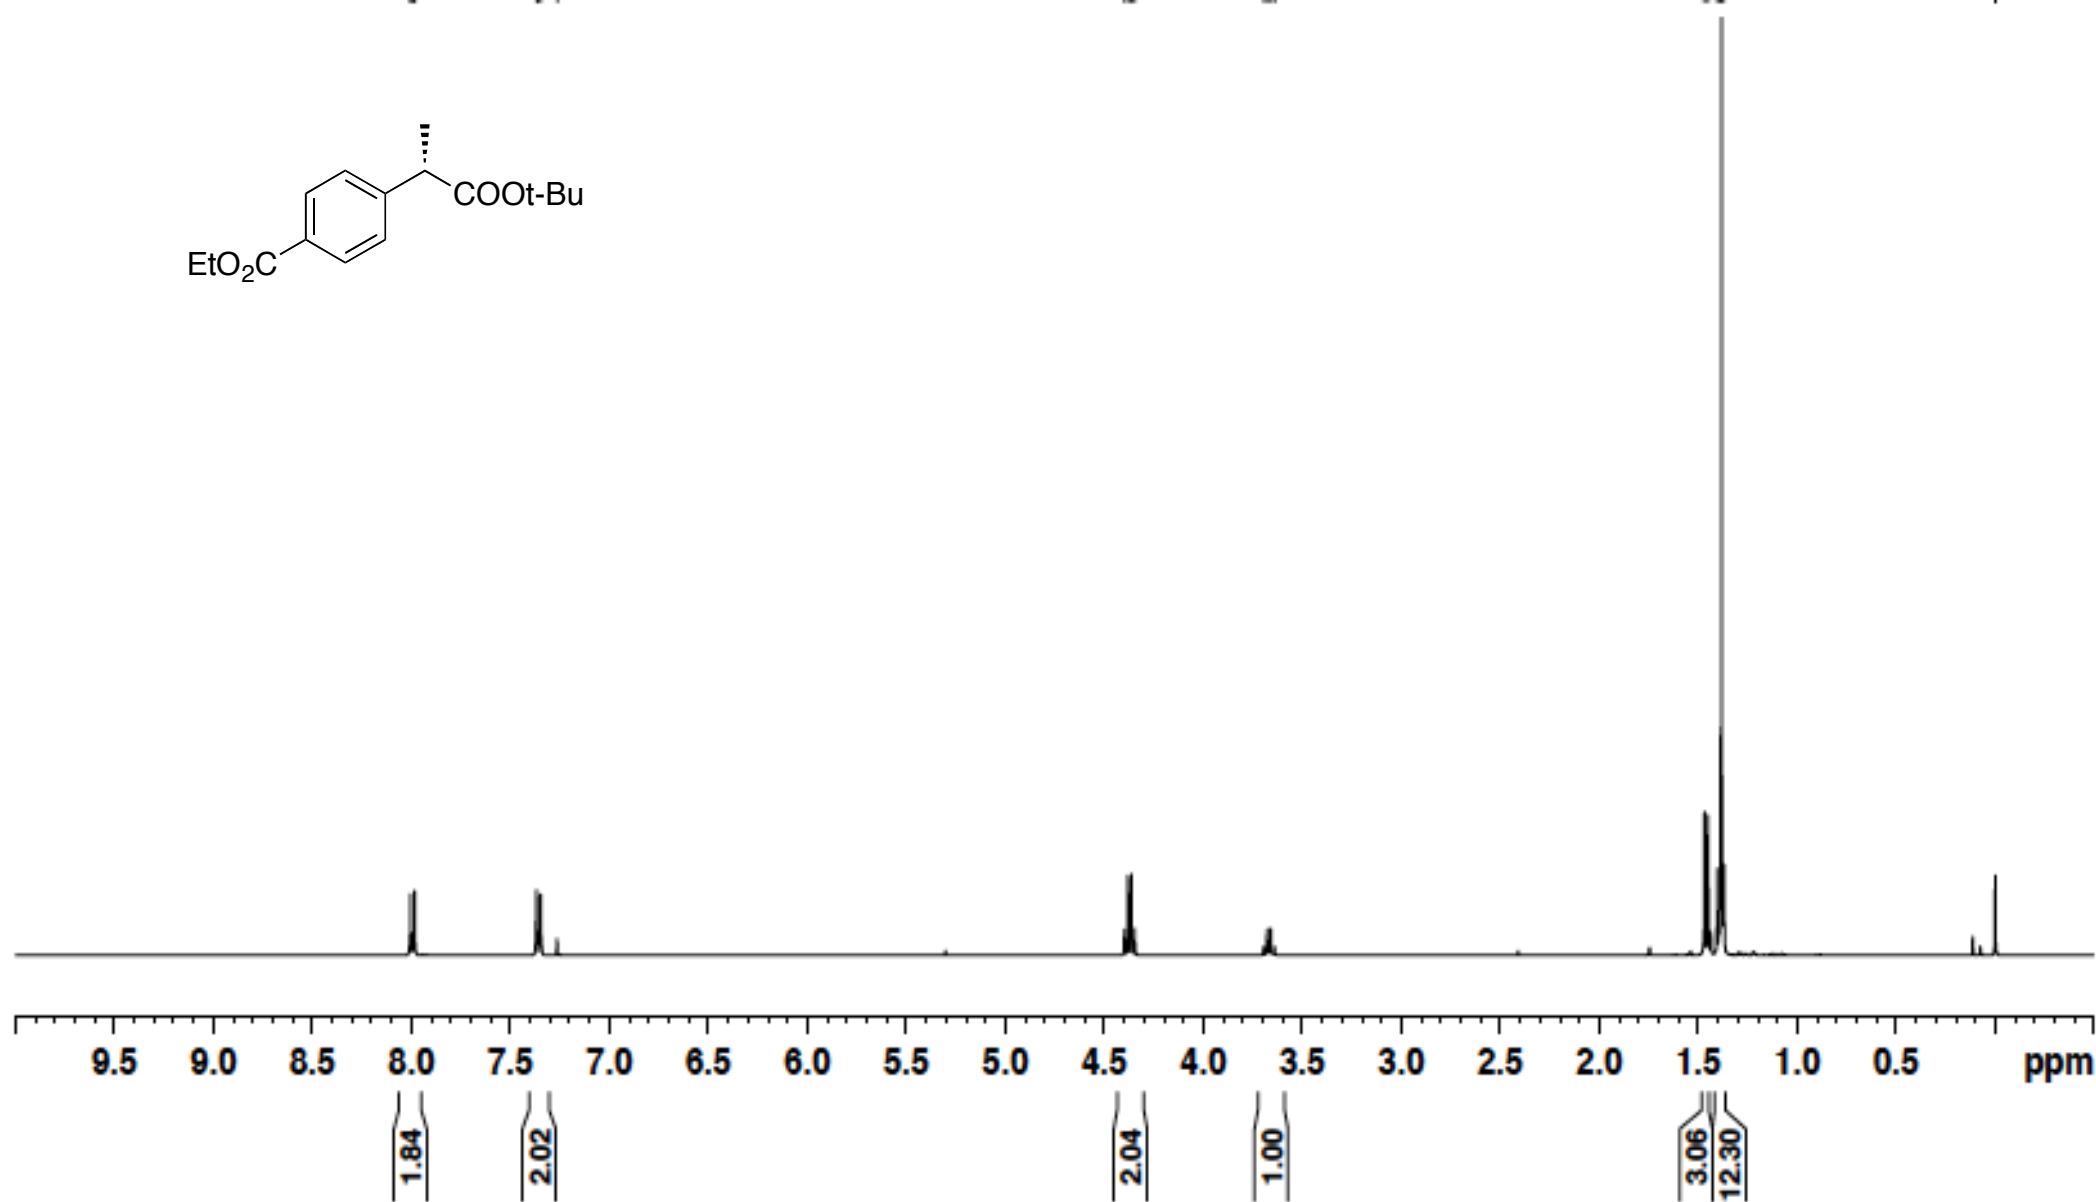

JF11-23-11, HNMR, CDCl3 BBFO2  
2013-07-05

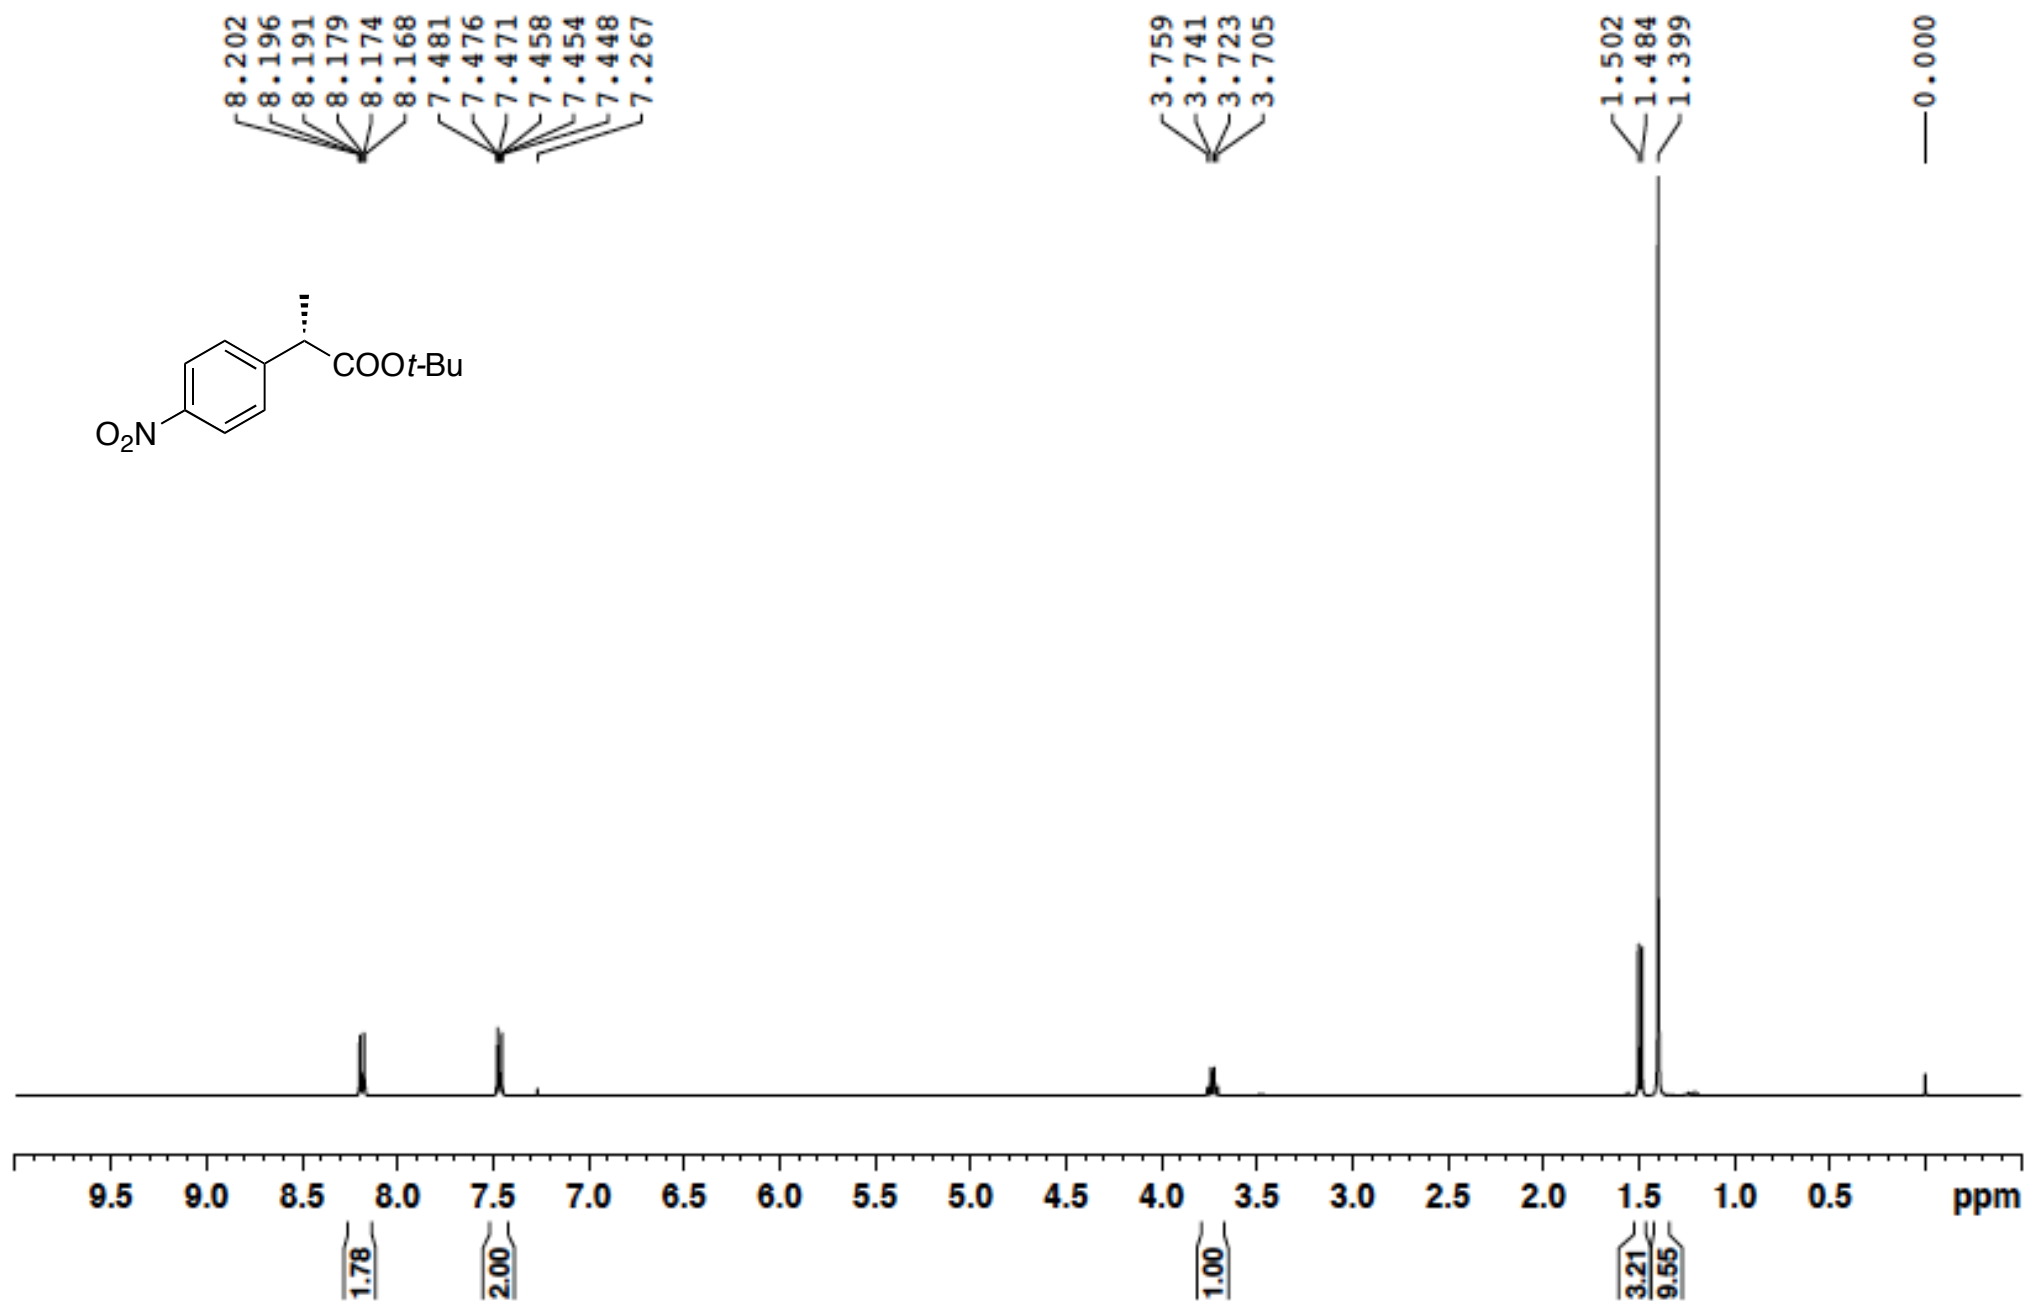

JF11-23-11, <sup>13</sup>CNMR, CDCl<sub>3</sub> BBFO2  
2013-07-05

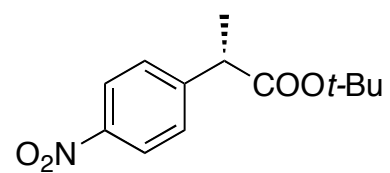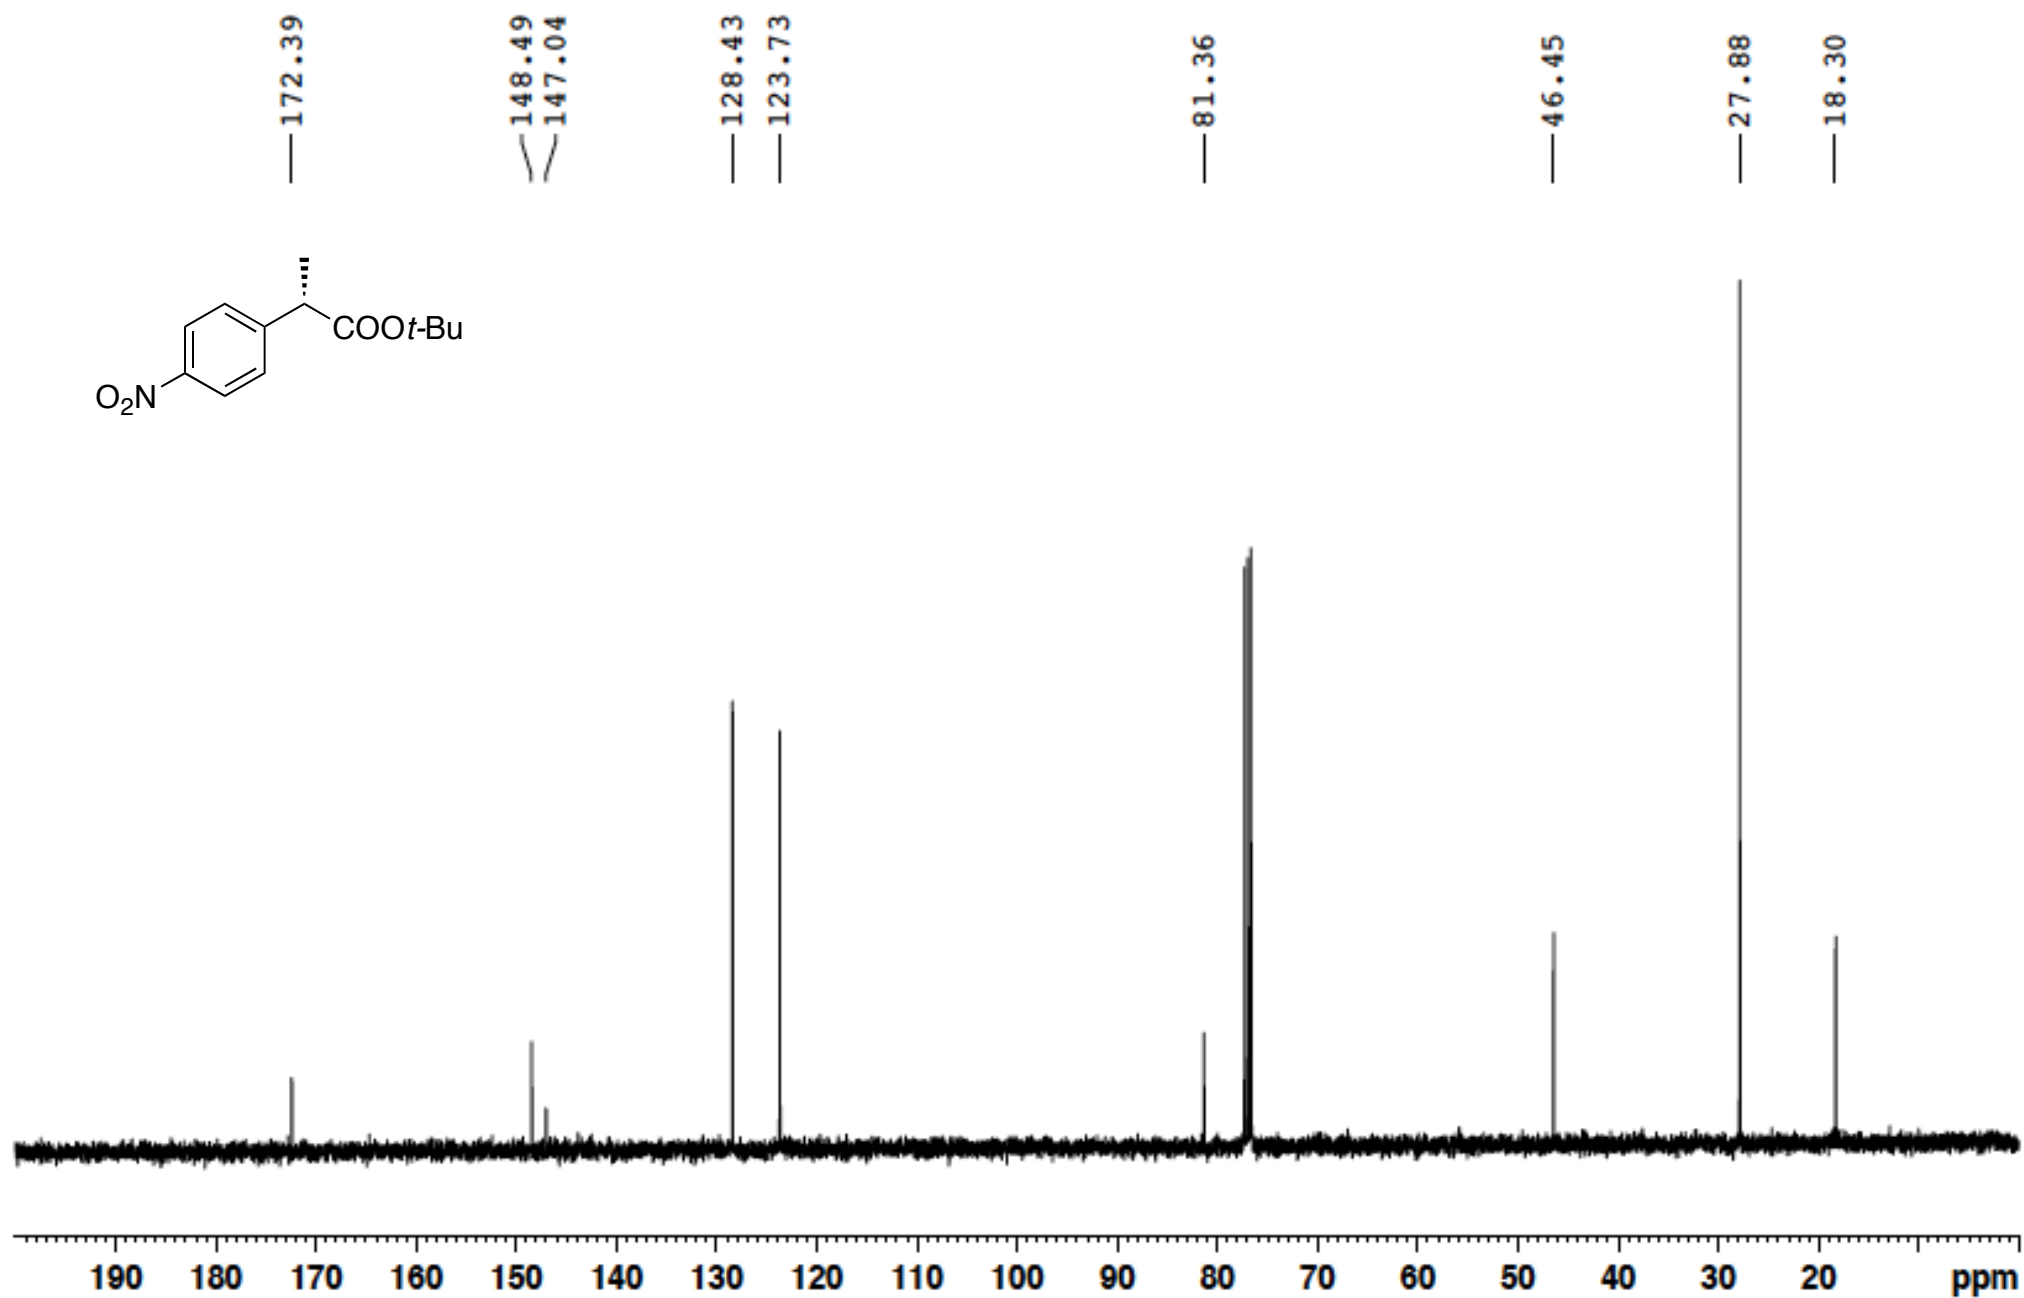



JF11-23-1, HNMR, CDCl<sub>3</sub> BBF02  
2013-07-05

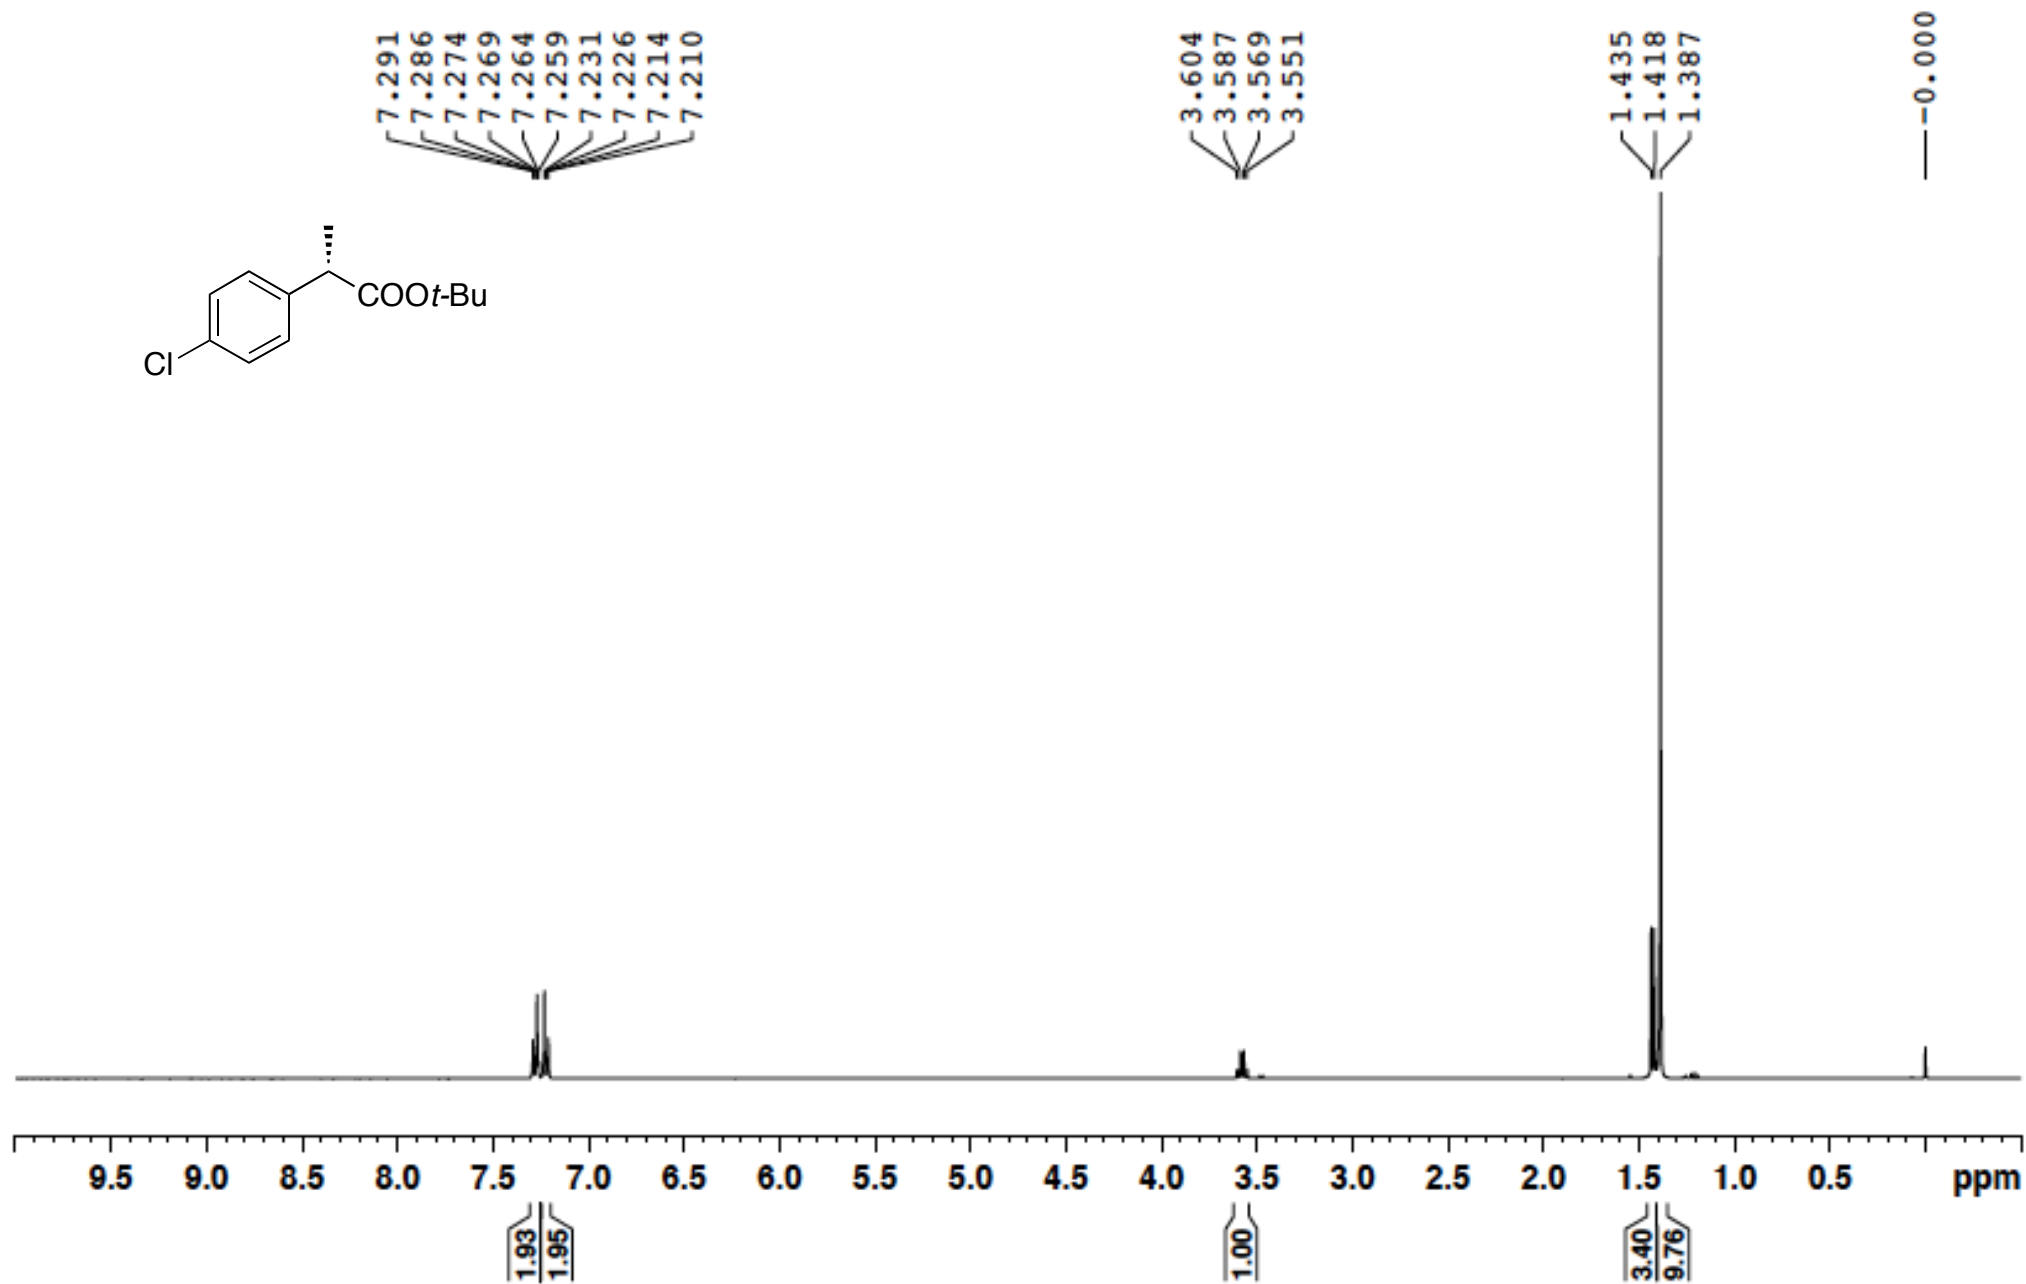

JF11-23-1, <sup>13</sup>CNMR, CDCl<sub>3</sub> BBFO2  
2013-07-05

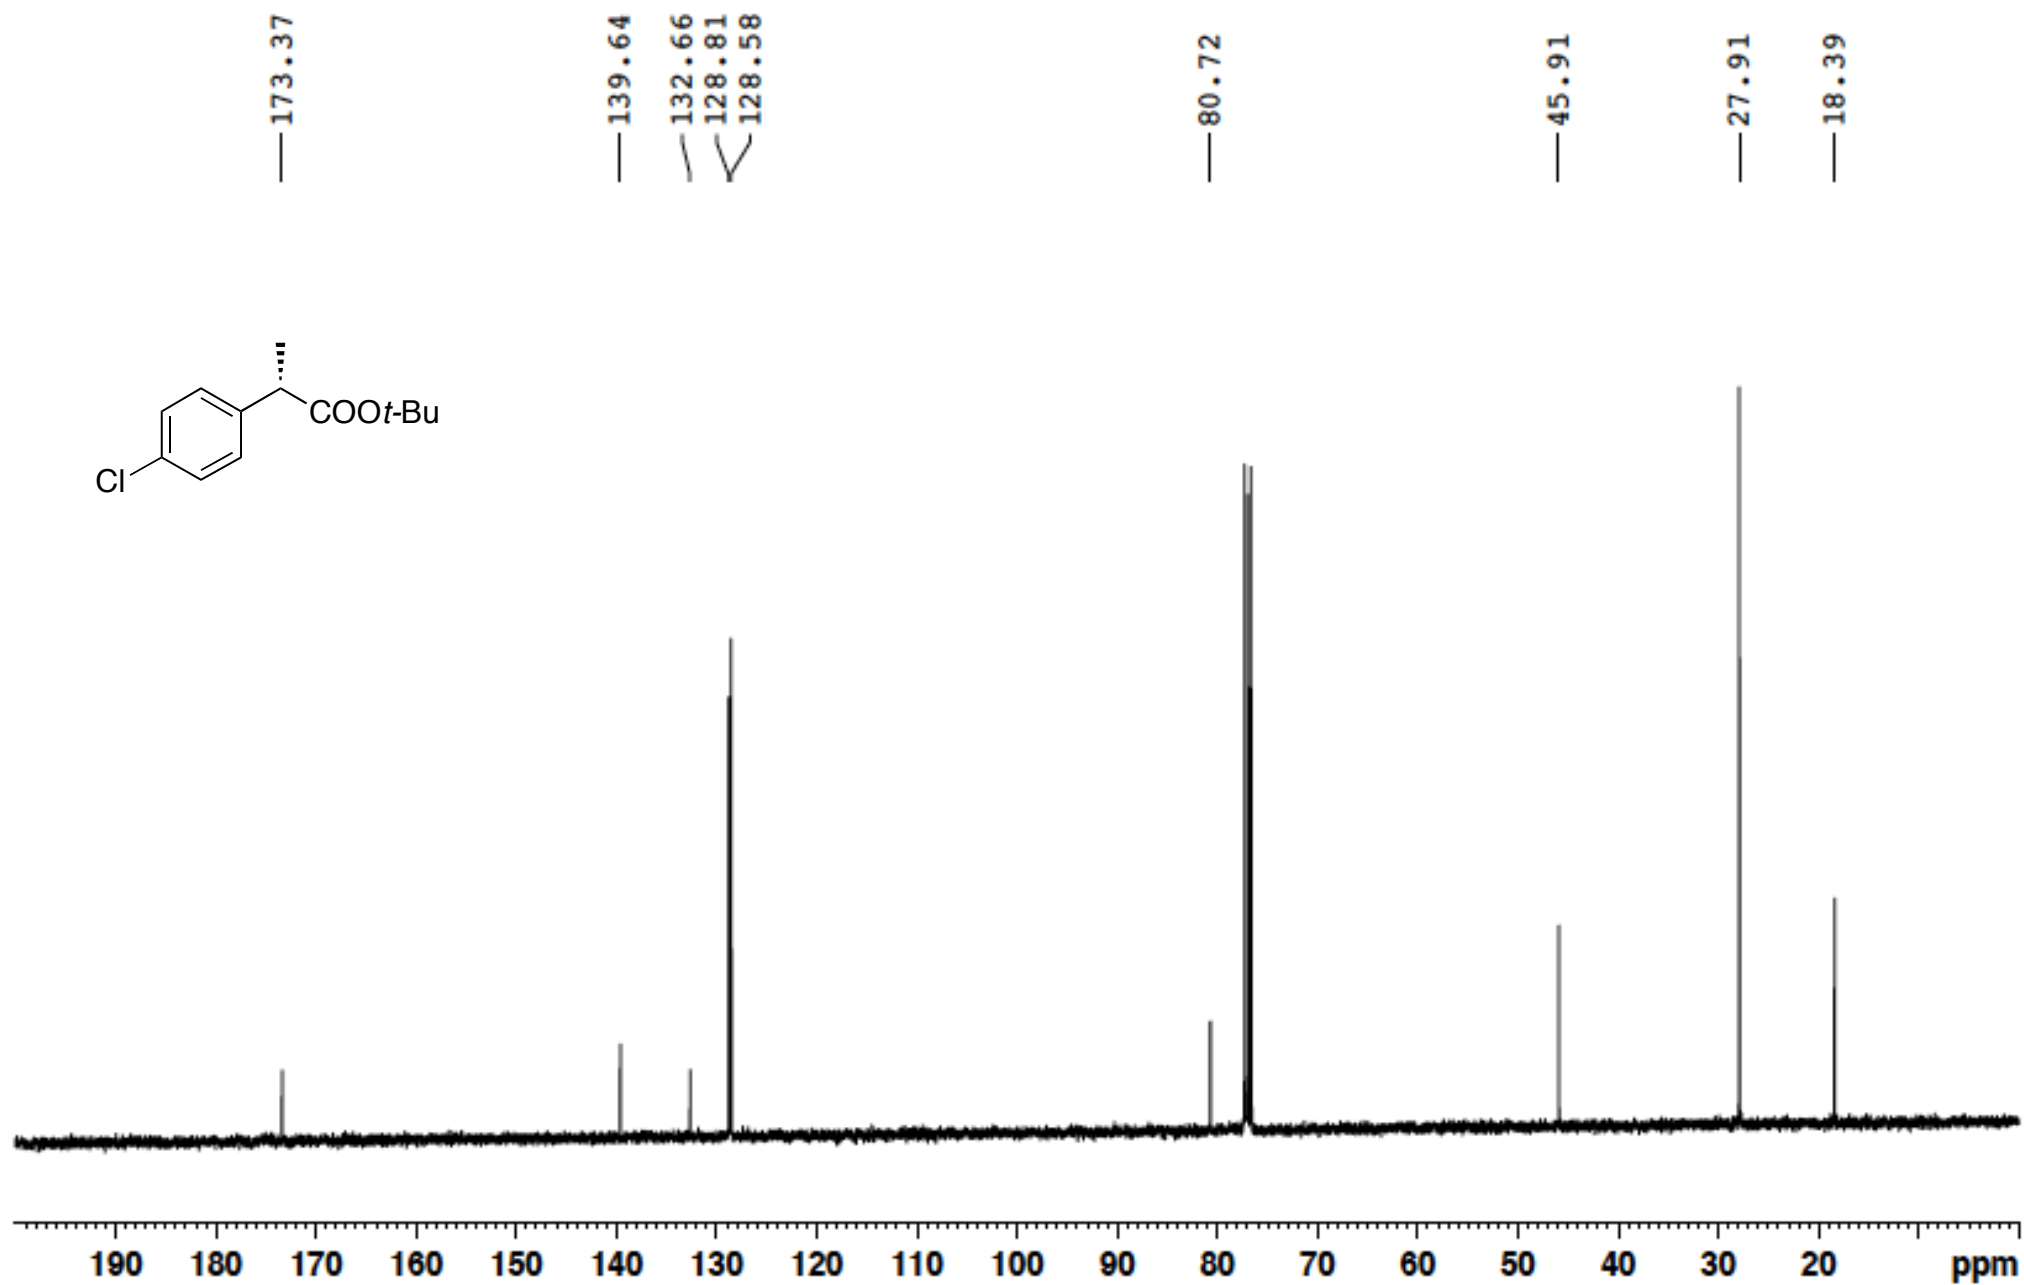

JF11-23-7, HNMR, CDCl<sub>3</sub> BFO2  
2013-07-05

7.307  
7.303  
7.288  
7.284  
7.269  
7.265  
7.260  
7.226  
7.221  
7.212  
7.206  
7.201  
7.192  
7.188  
7.119  
7.116  
7.100  
7.097  
7.081  
7.078  
7.052  
7.049  
7.031  
7.027  
7.023  
7.005  
7.003

3.946  
3.928  
3.910  
3.892

1.458  
1.440  
1.404

0.070  
0.000

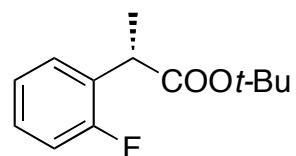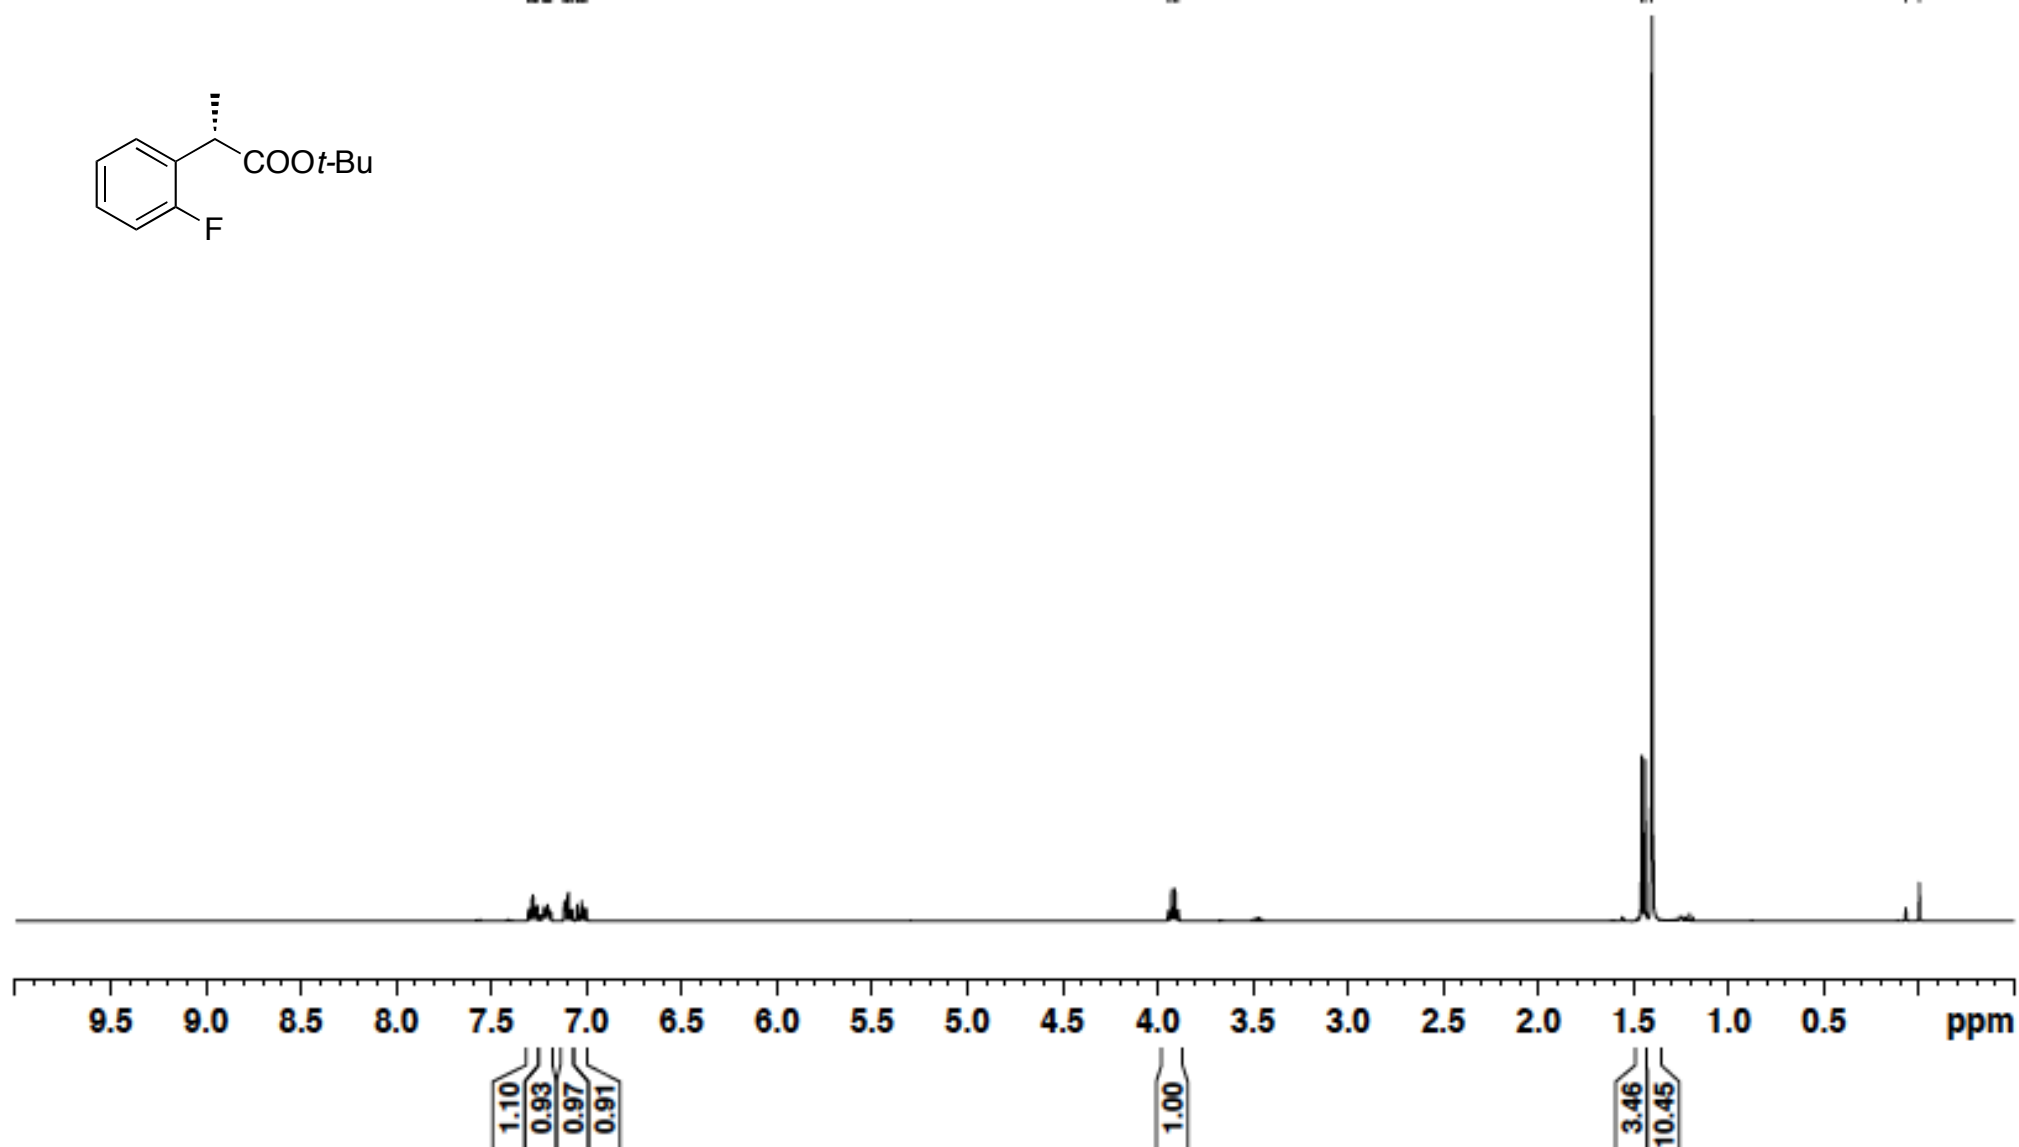

JF11-23-7,  $^{13}\text{C}$ NMR,  $\text{CDCl}_3$  BBFO2  
2013-07-05

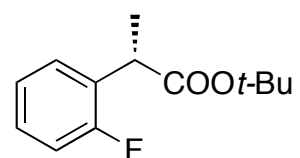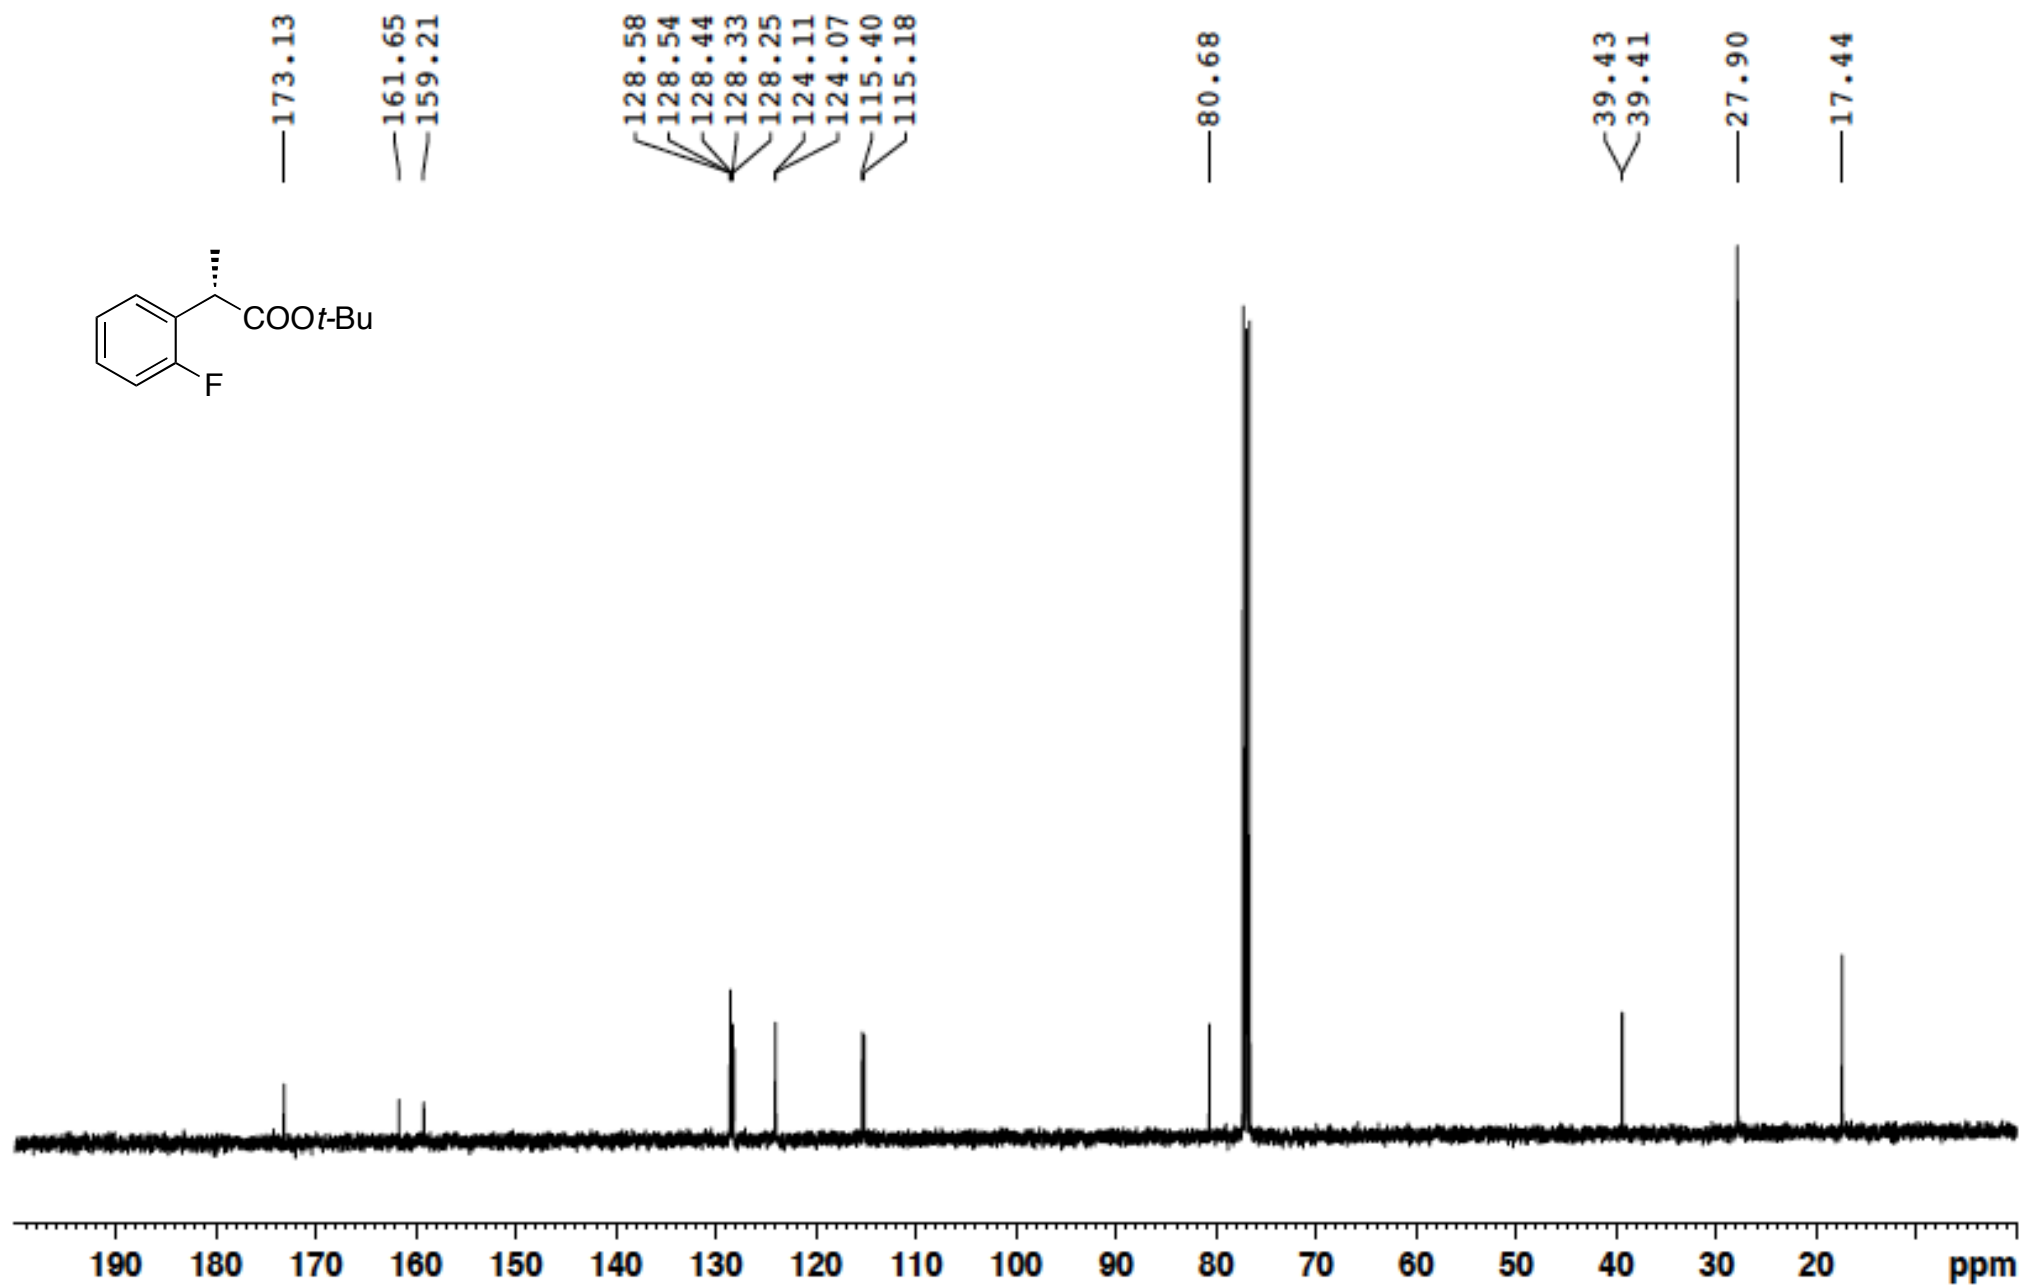

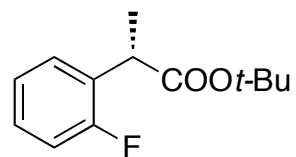

-118.30

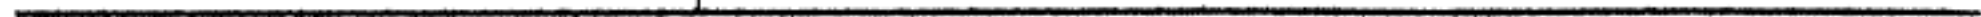

-70 -80 -90 -100 -110 -120 -130 -140 -150 -160 -170 -180 -190 -200 ppm

JF11-23-8, HNMR, CDCl3 BBFO2  
2013-07-05

8.192  
8.187  
8.183  
8.135  
8.133  
8.130  
8.128  
8.115  
8.113  
8.110  
8.107  
7.655  
7.636  
7.518  
7.498  
7.479  
7.266

3.764  
3.746  
3.728  
3.710

1.524  
1.506  
1.411

0.000

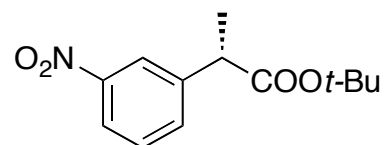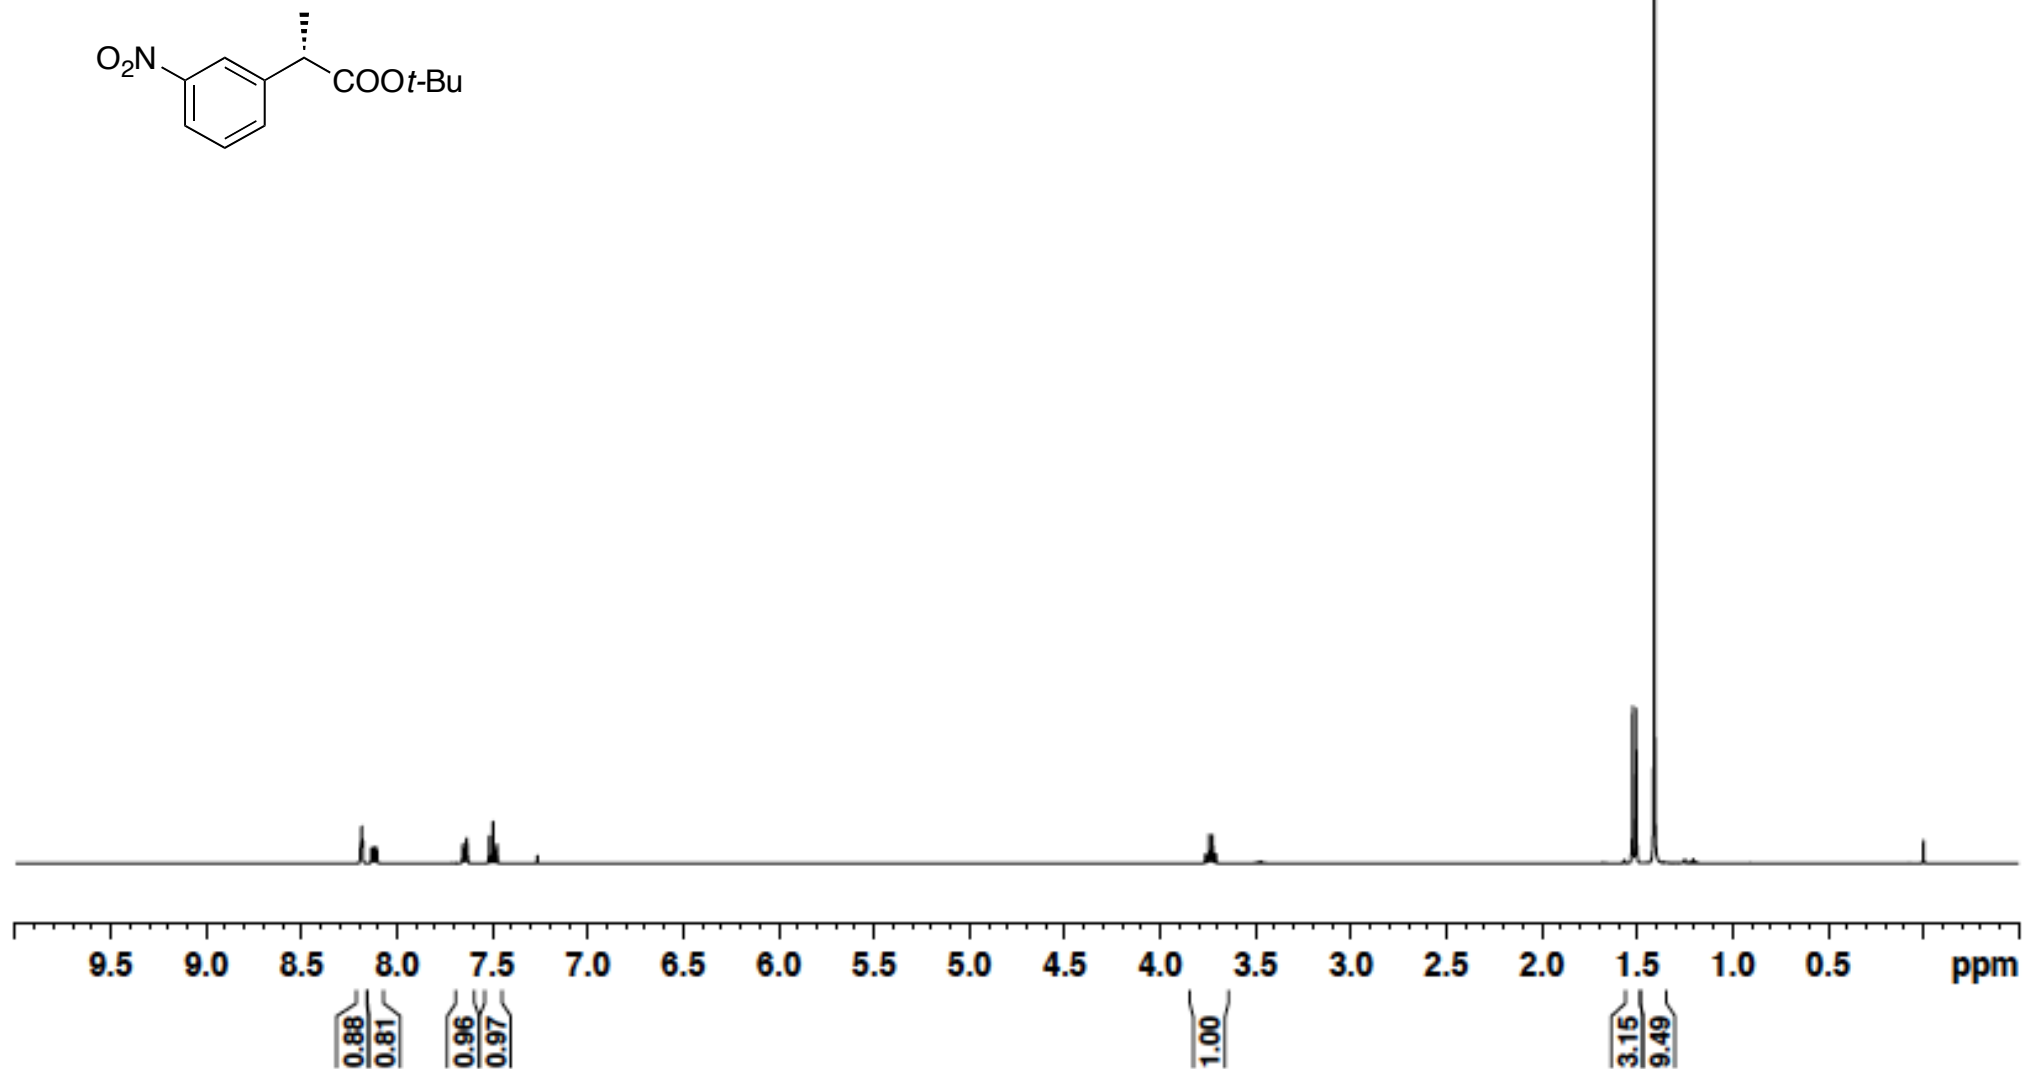

JF11-23-8, <sup>13</sup>CNMR, CDCl<sub>3</sub> BBFO2  
2013-07-05

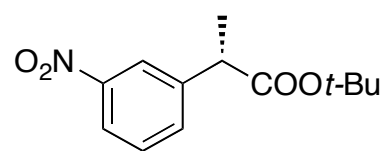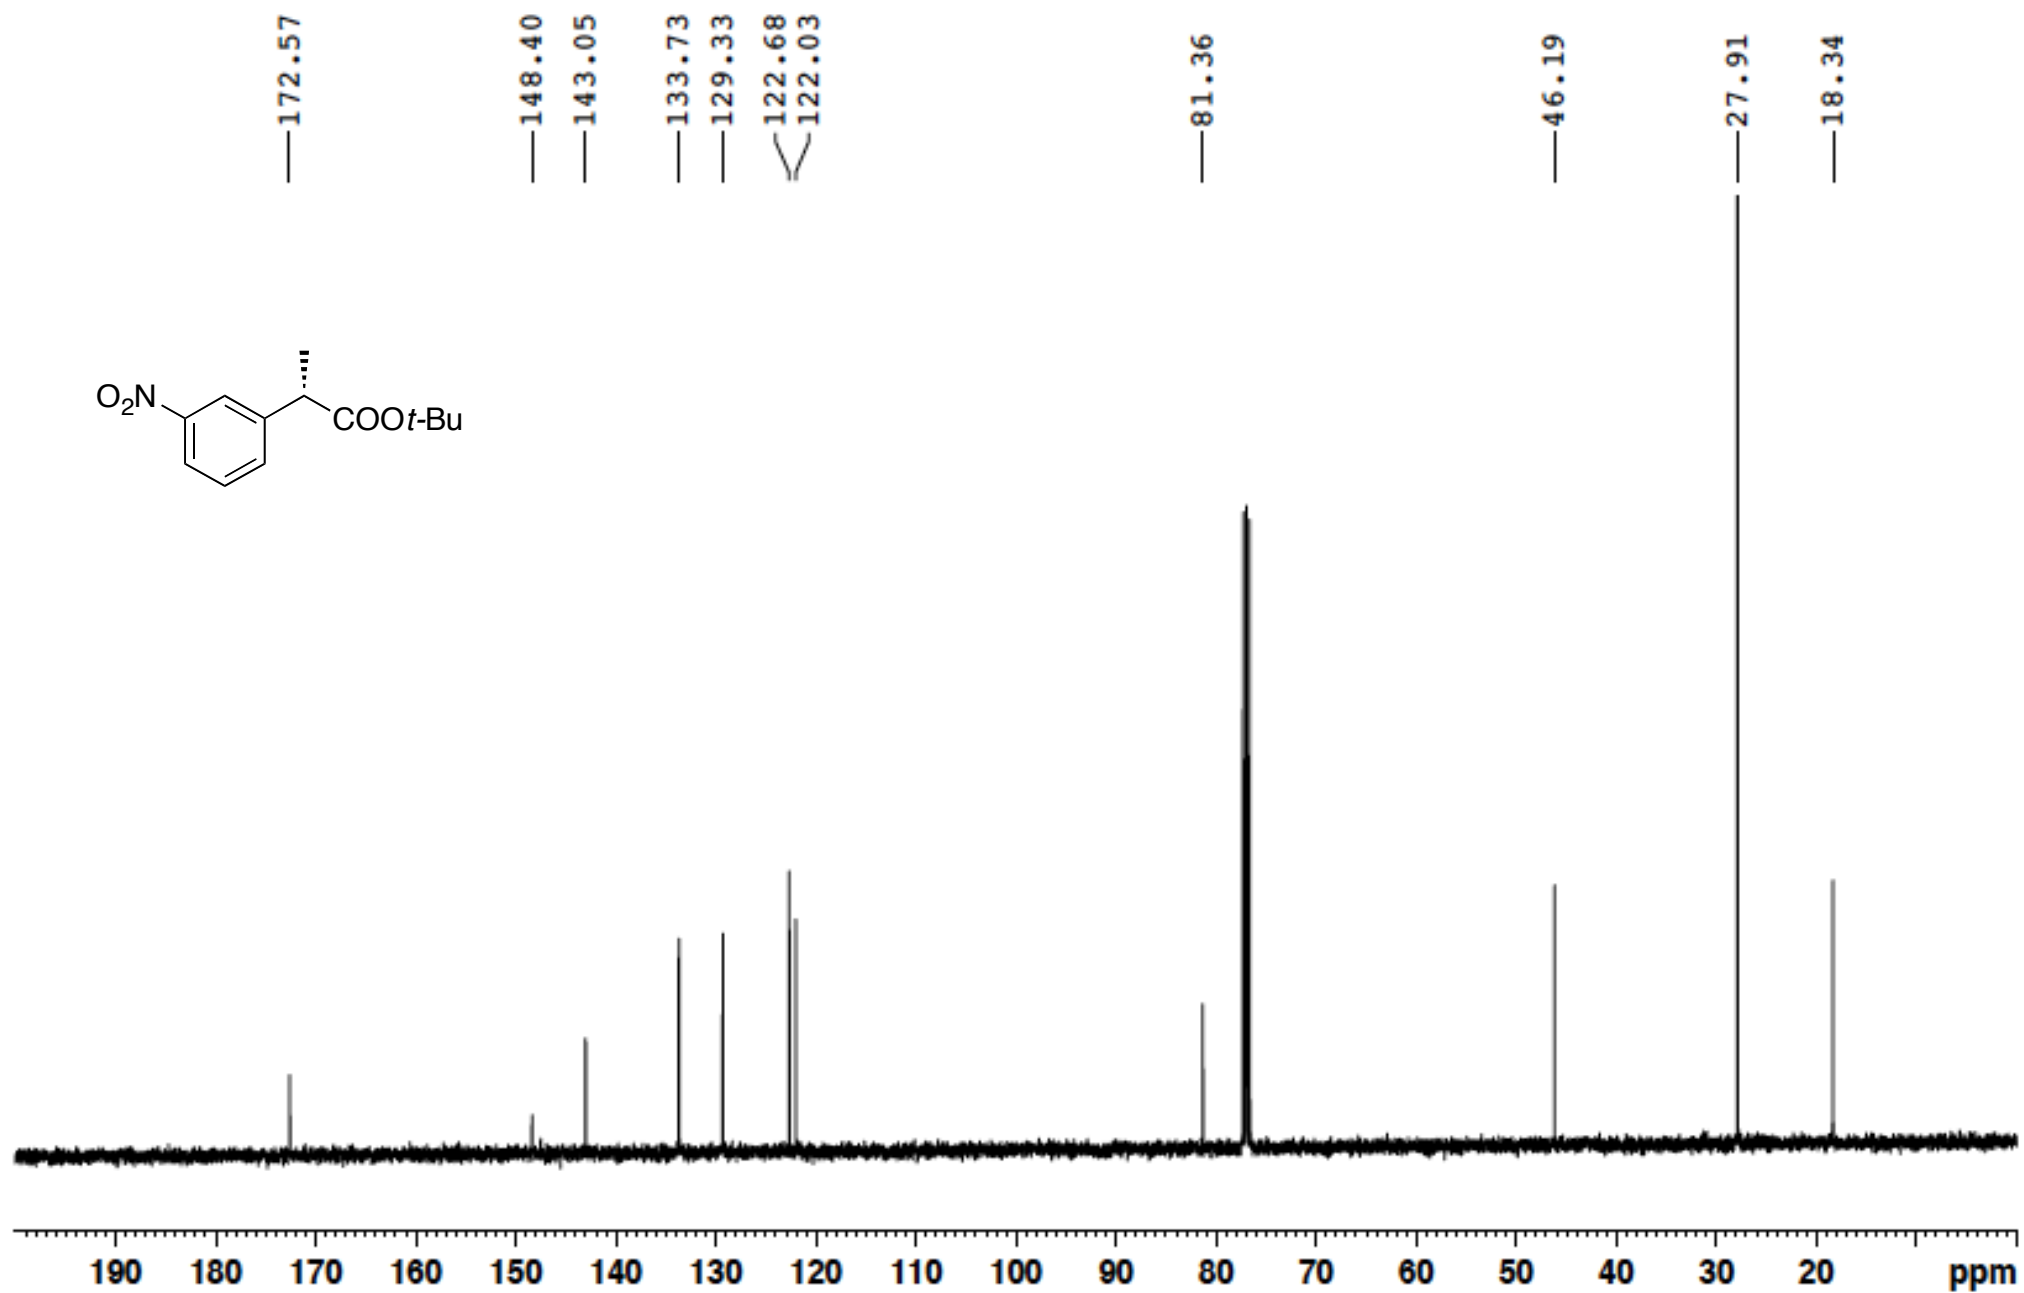

JF11-23-10 1HNMR, CDCl3, BBF01  
2013-07-24

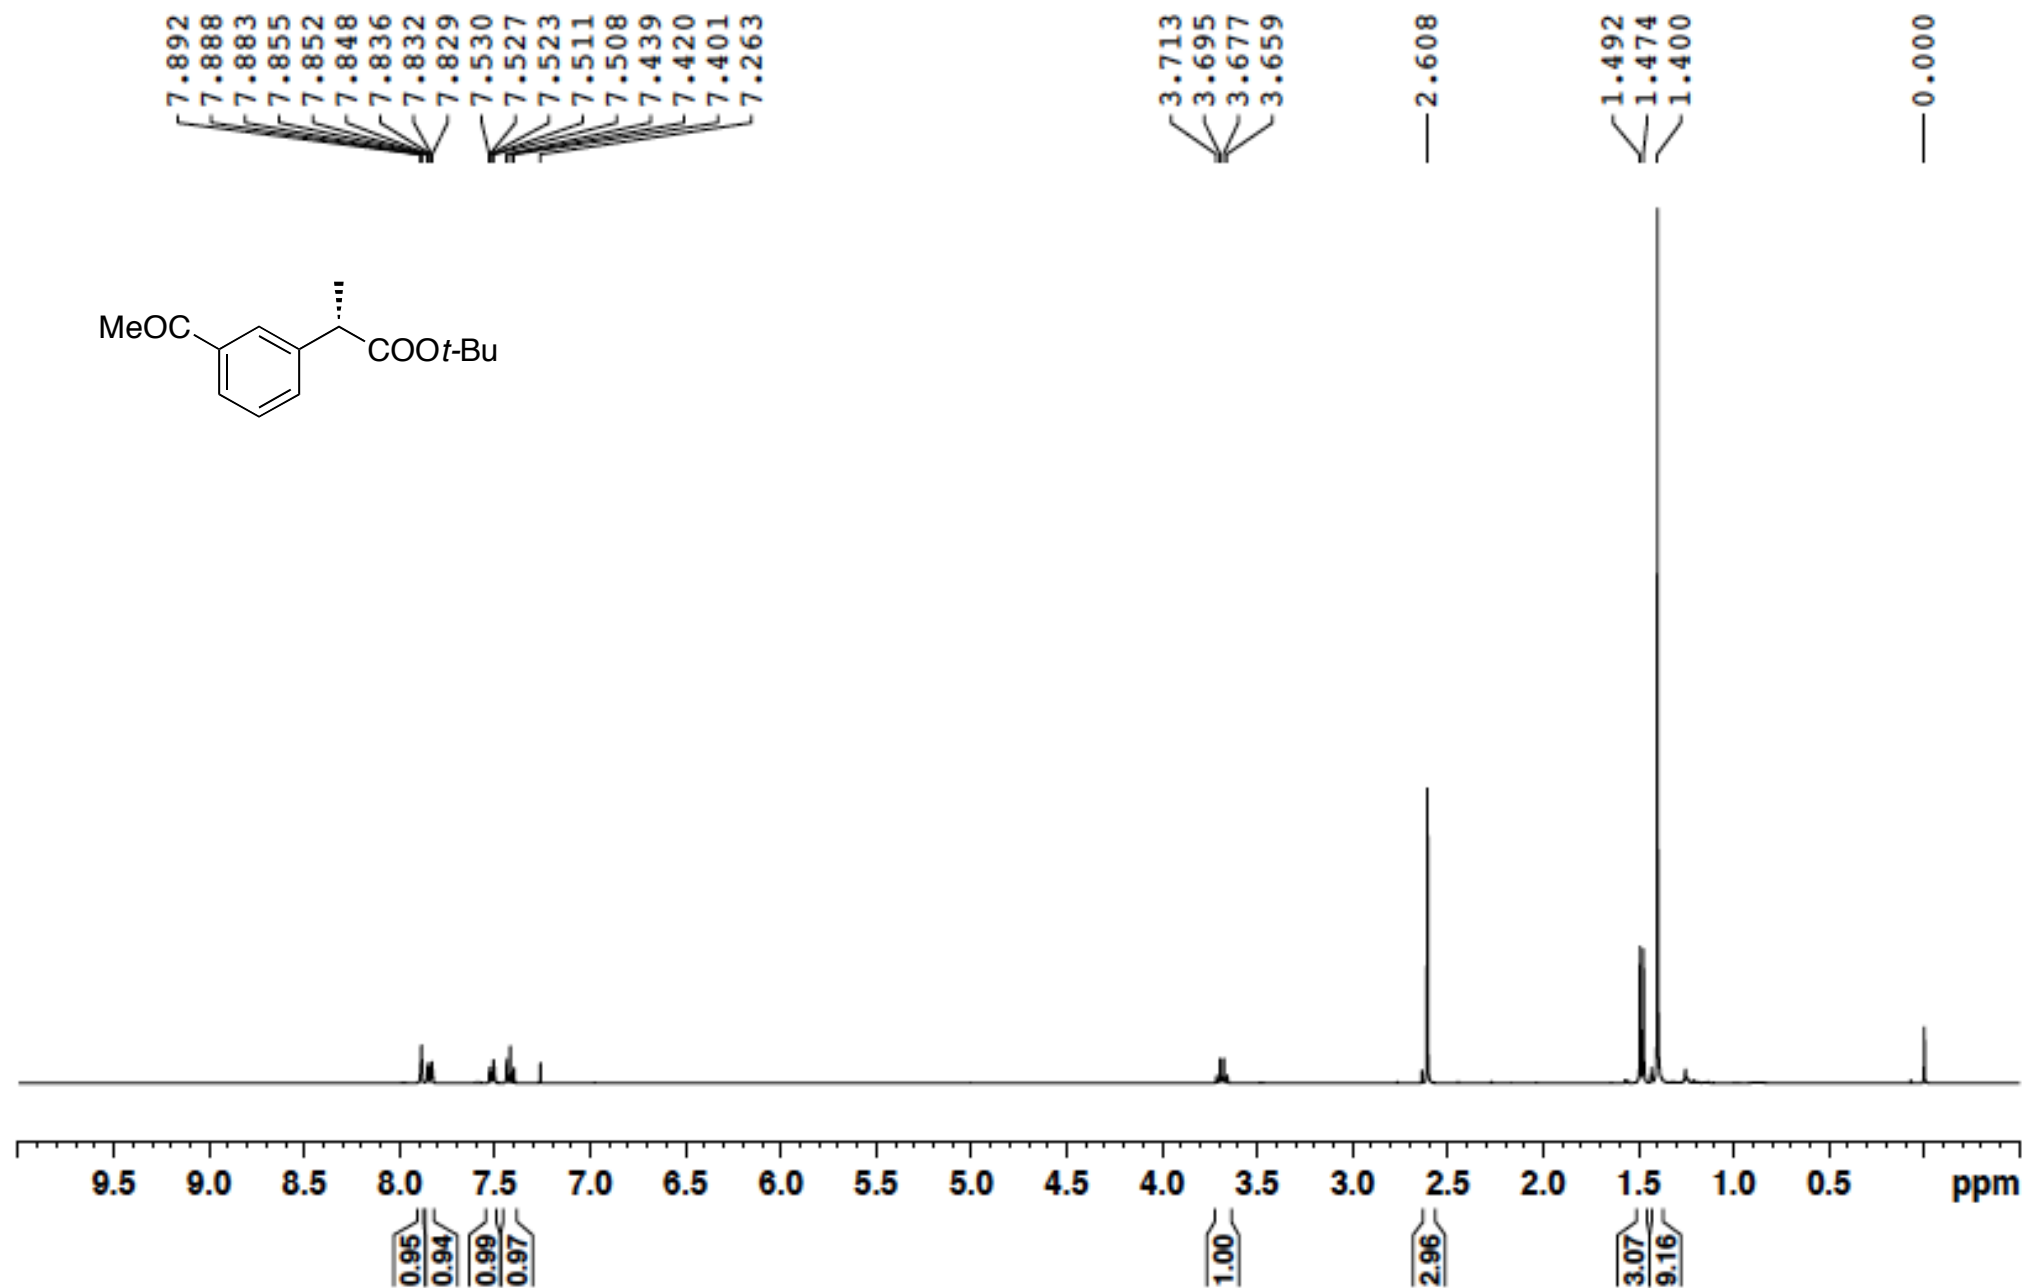



JF11-23-10 13CNMR, CDCl3, BBF01  
2013-07-24

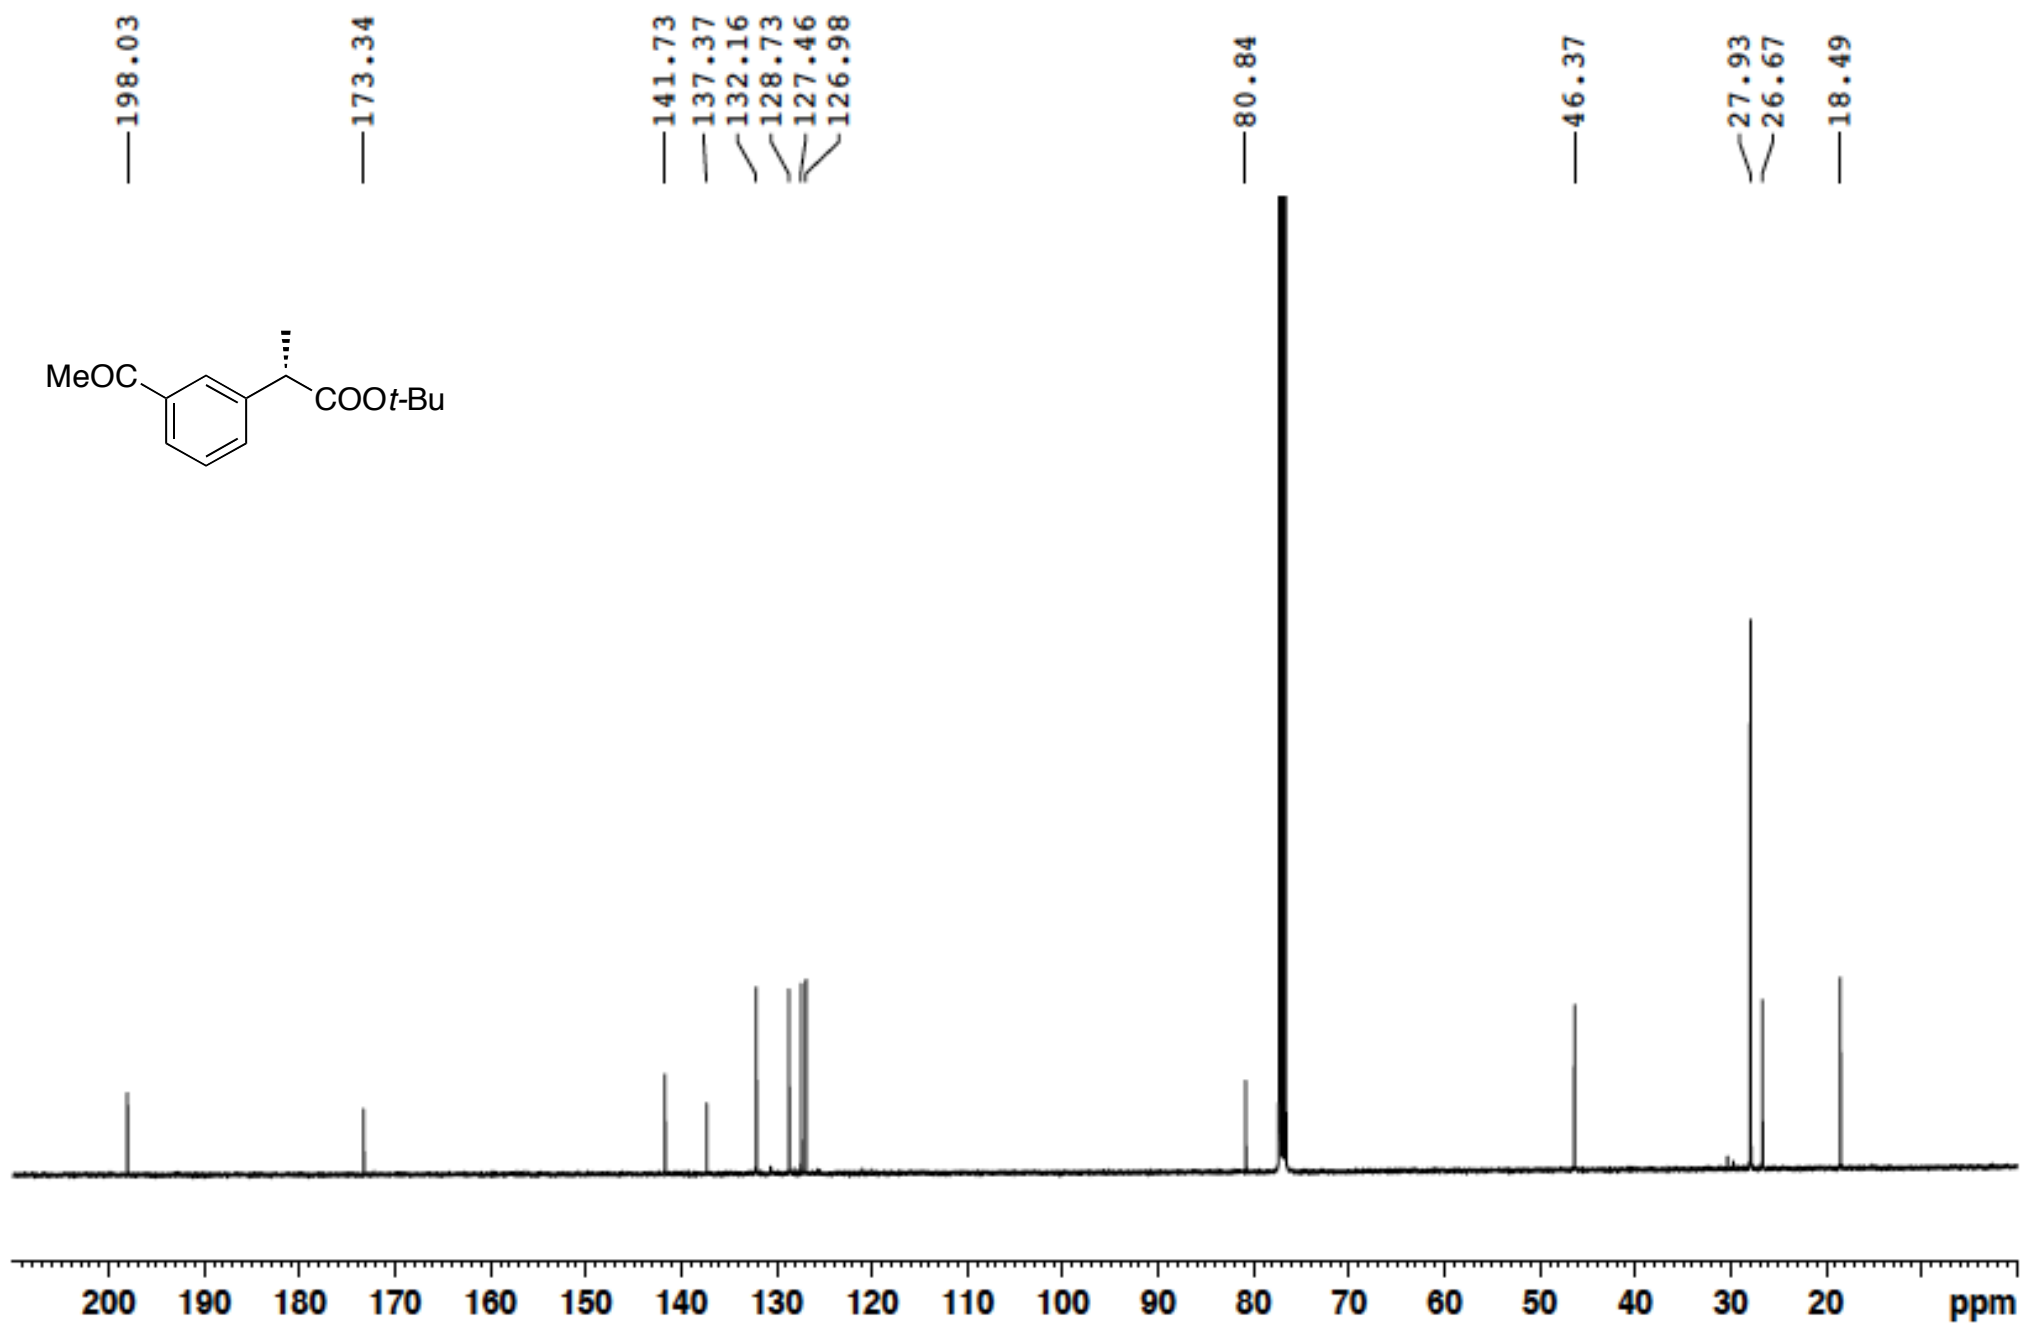

JF11-29-9, HNMR, CDCl<sub>3</sub> BBF02  
2013-07-21

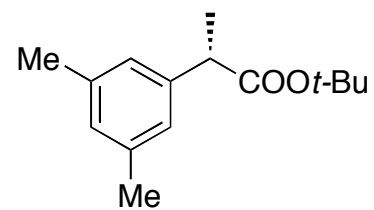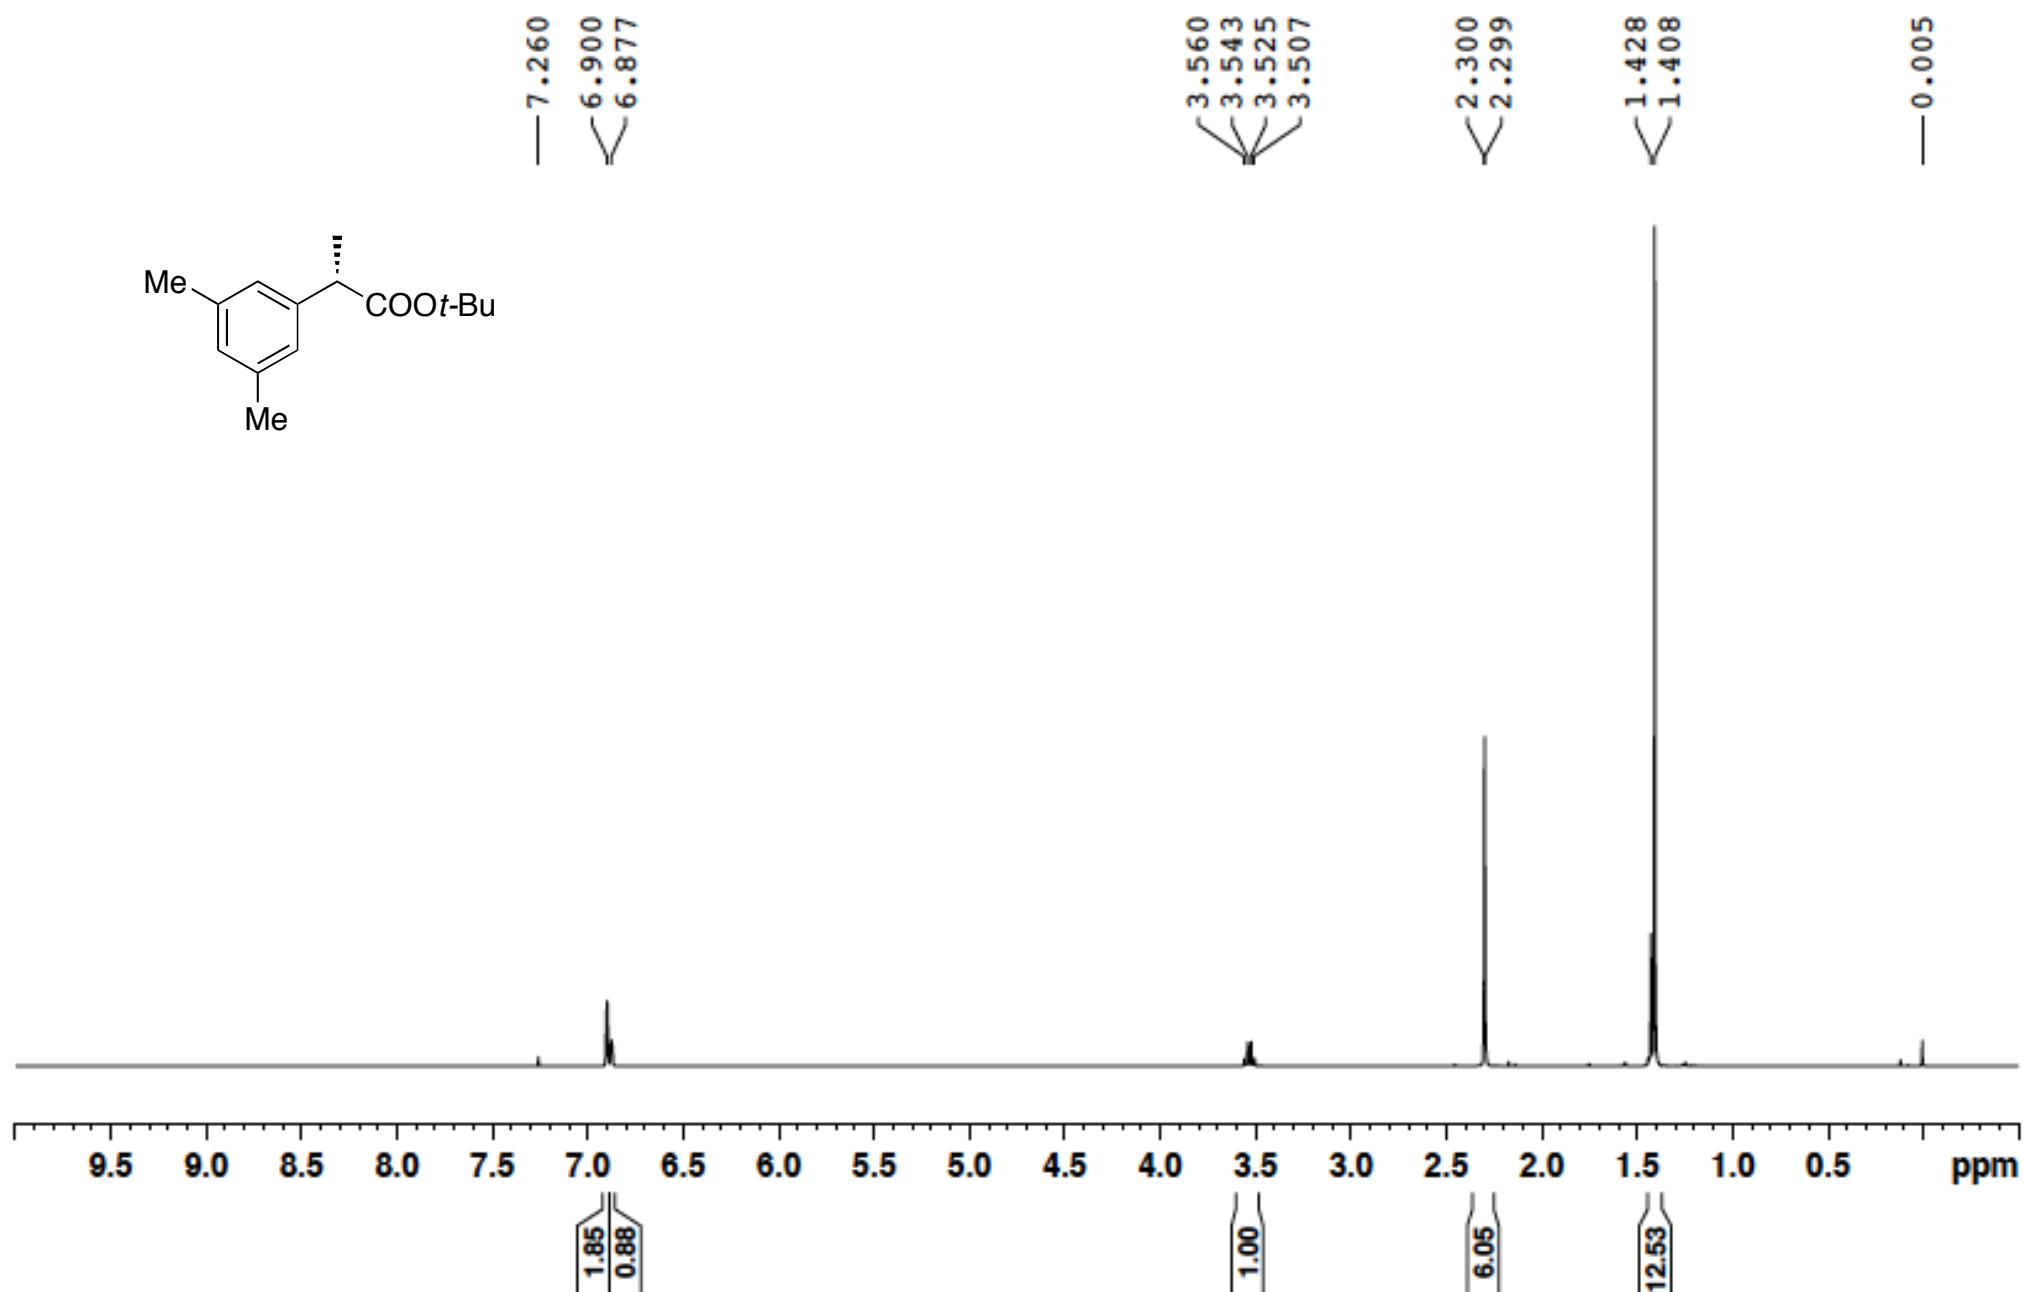

JF11-29-9 <sup>13</sup>CNMR, CDCl<sub>3</sub>, BBF01  
2013-07-22

— 174.07

— 141.07

— 137.86

— 128.46

— 125.20

— 80.31

— 46.30

— 27.97

— 21.30

— 18.71

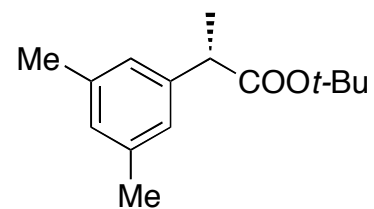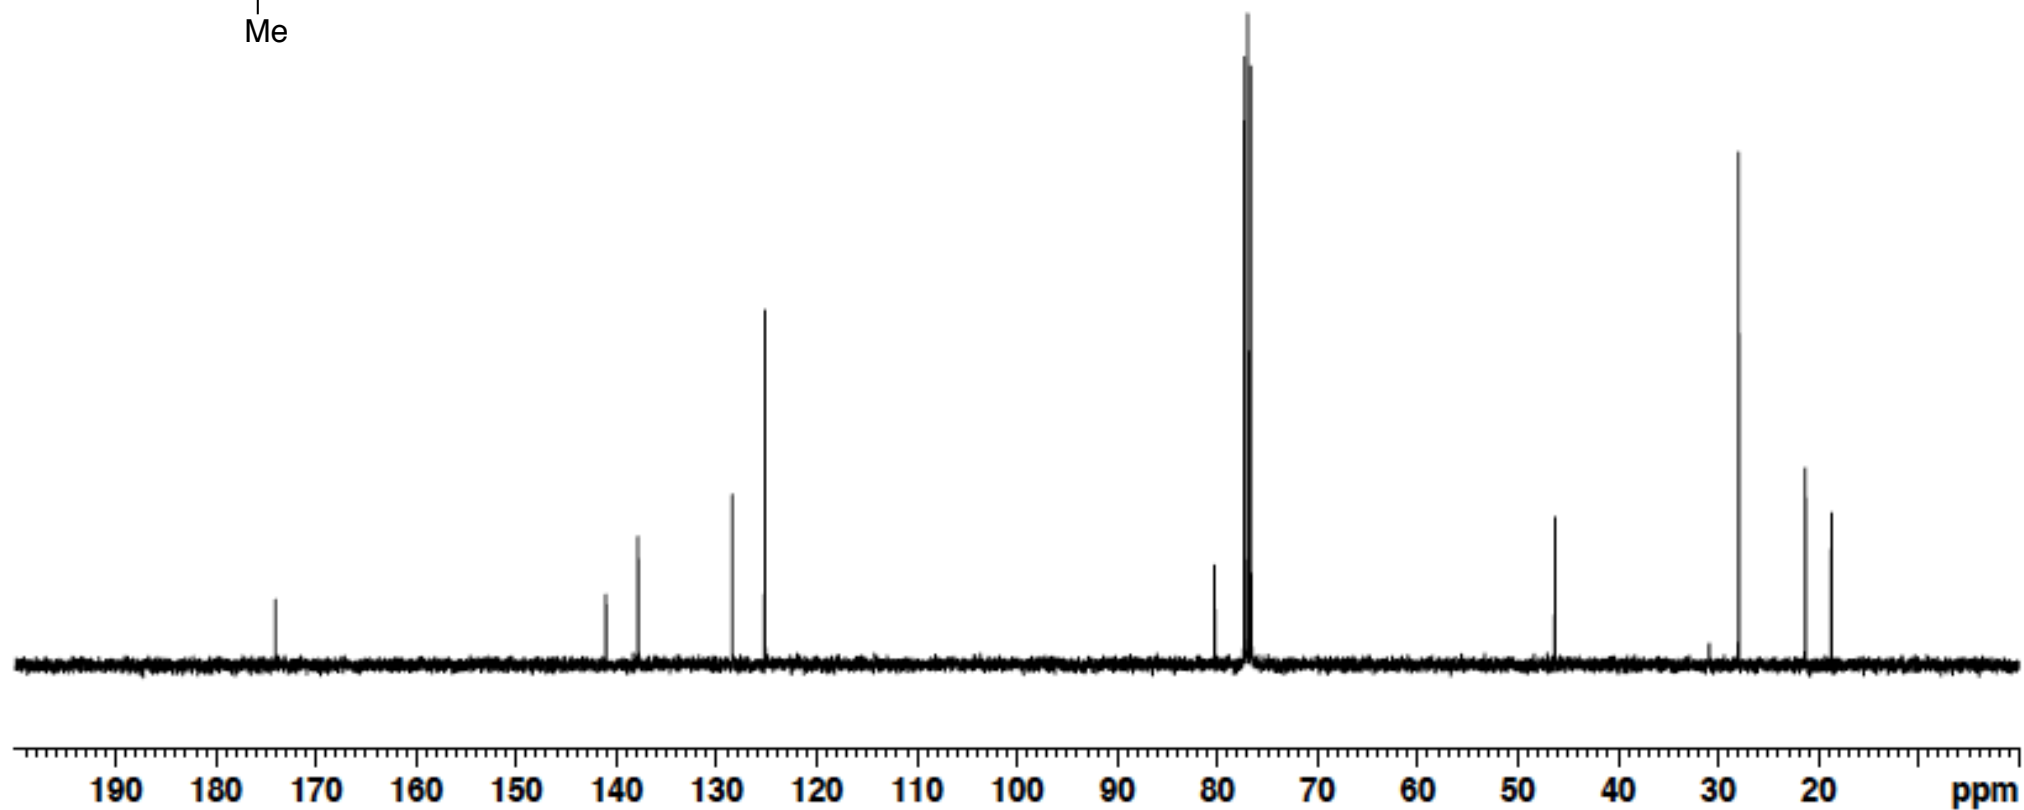

JF11-36-8, HNMR, CDCl<sub>3</sub> BBFO2  
2013-07-21

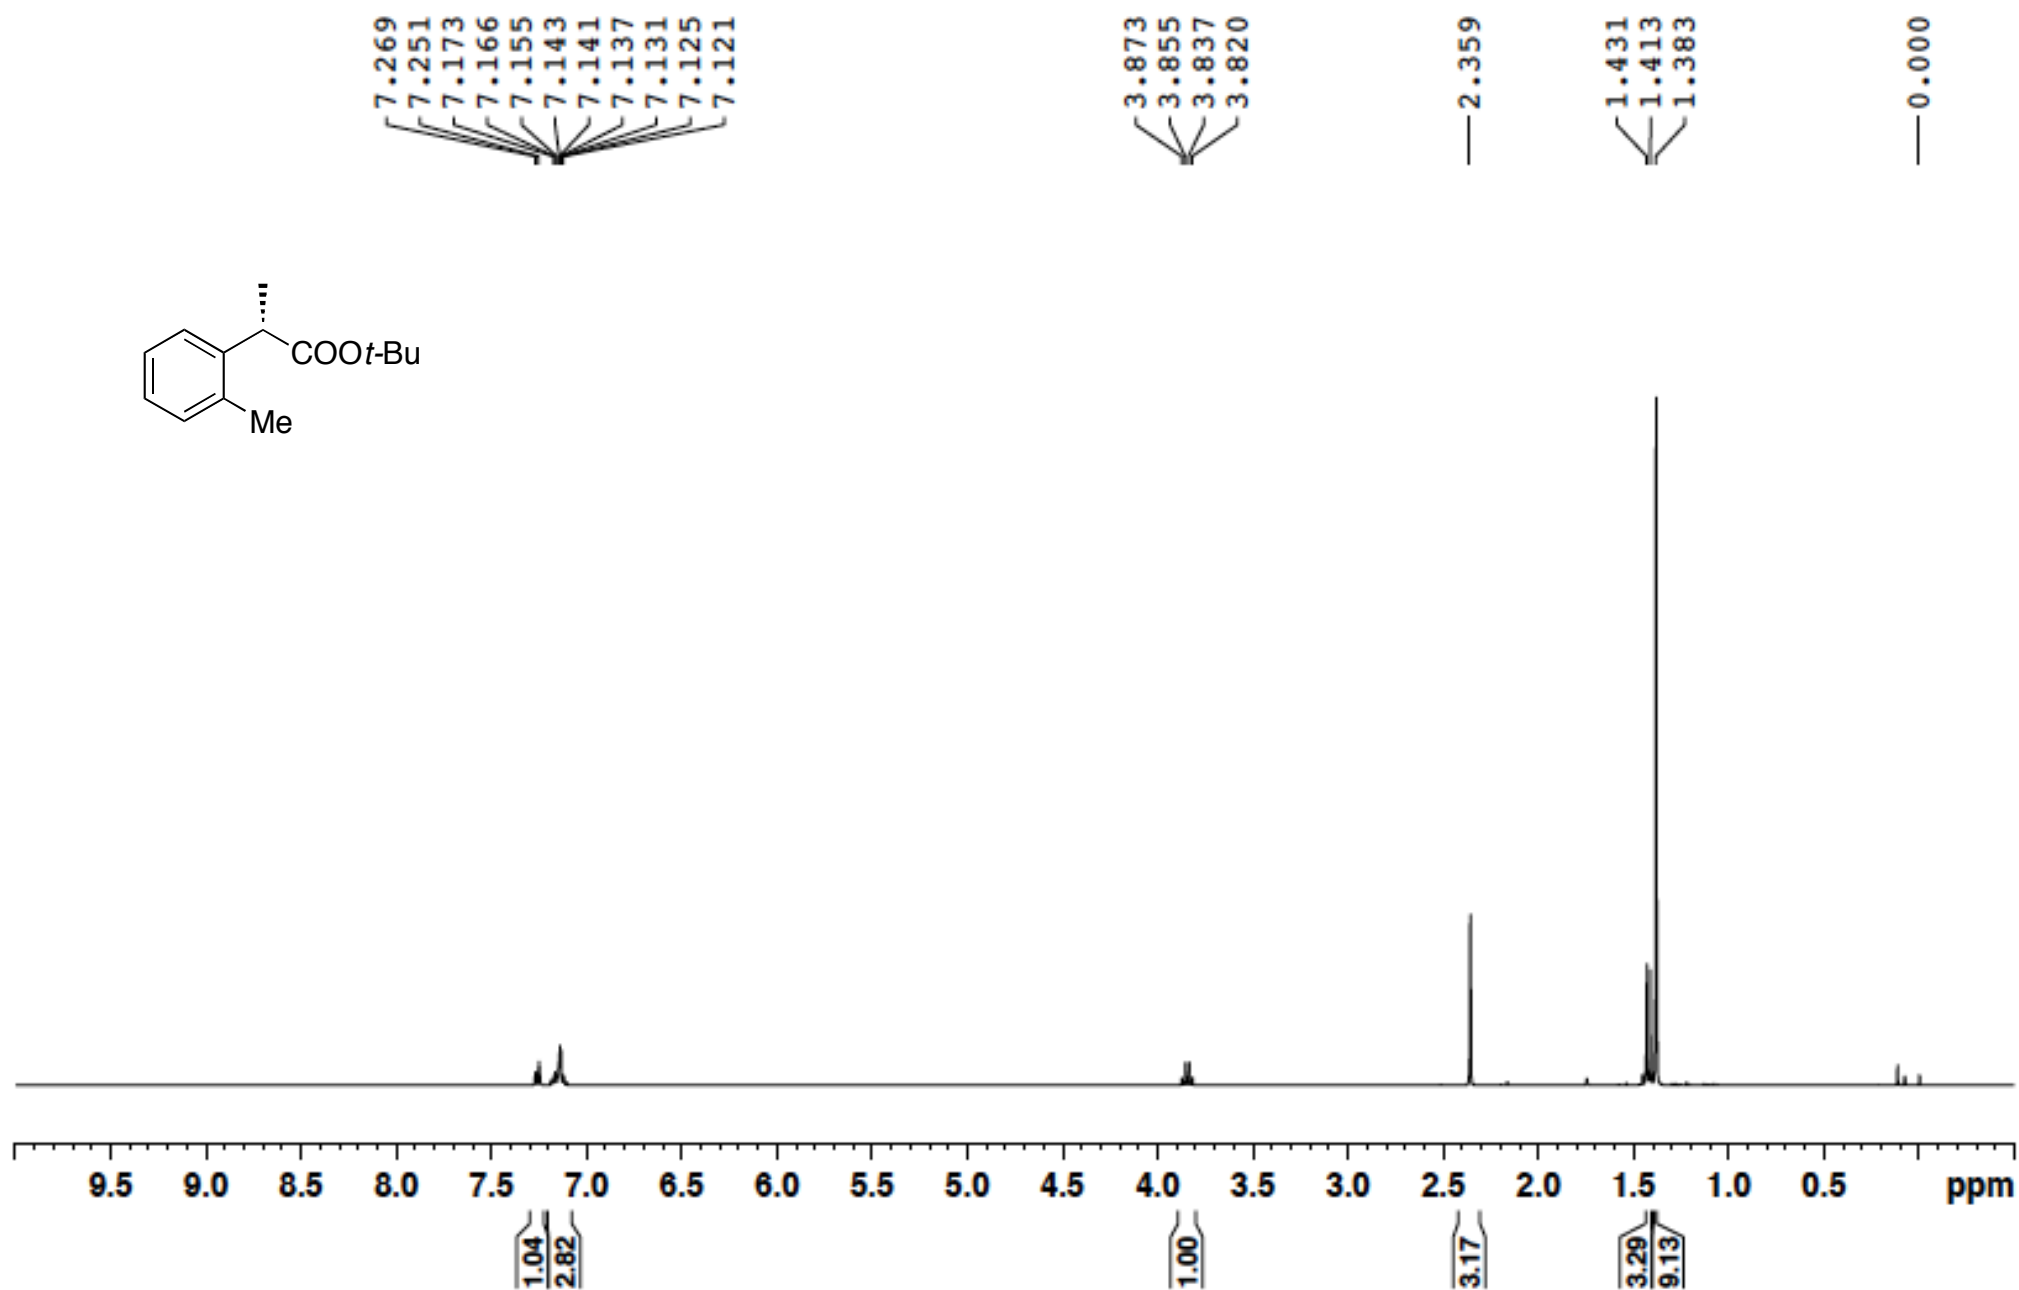

JF11-23-9, HNMR, CDCl<sub>3</sub> BBF02  
2013-07-05

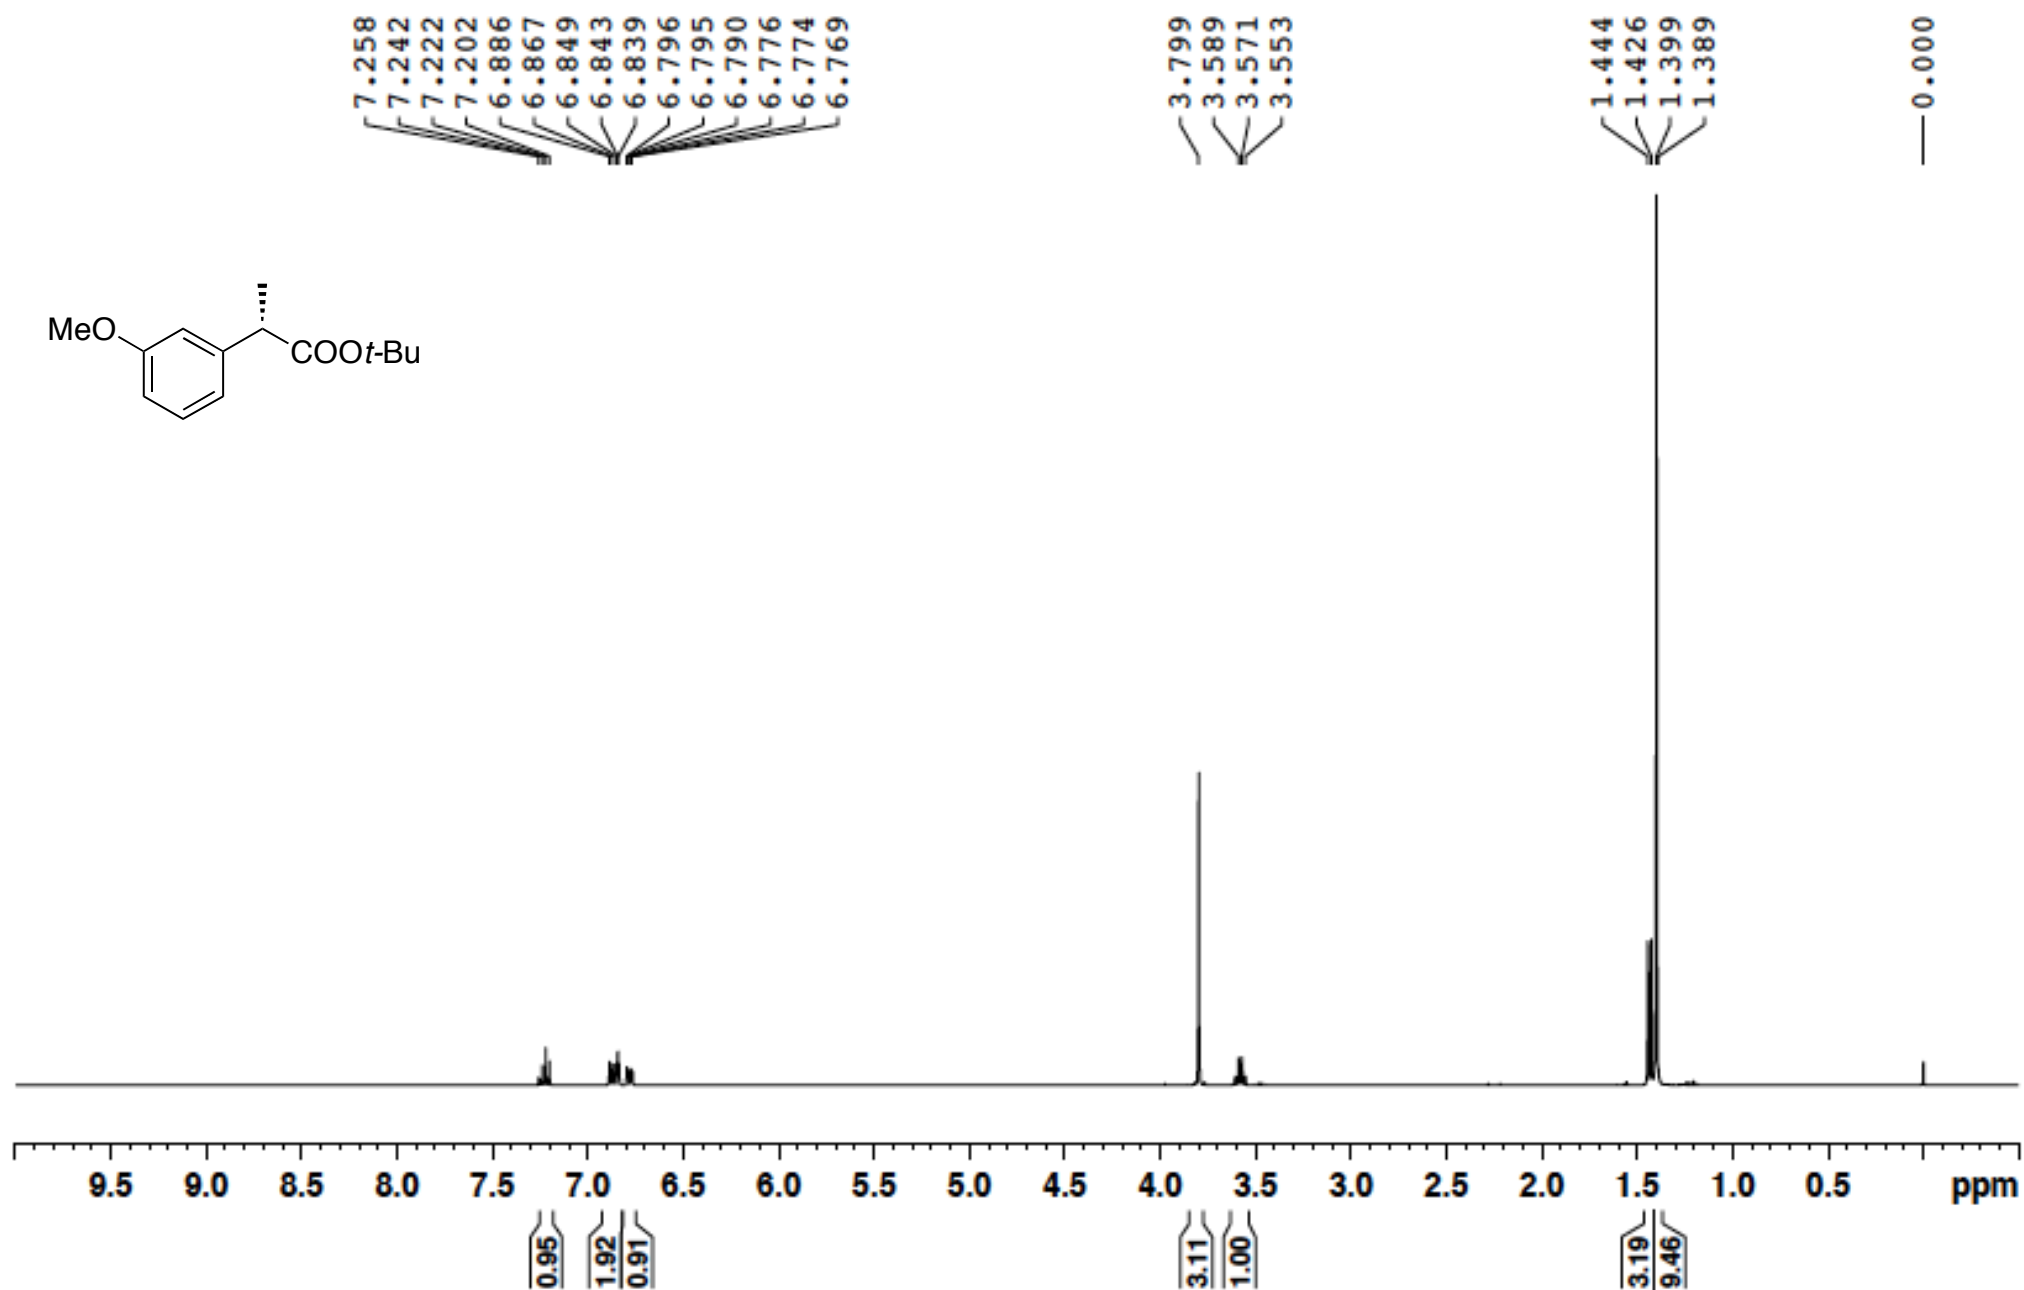

JF11-23-9, <sup>13</sup>CNMR, CDCl<sub>3</sub> BBFO2  
2013-07-05

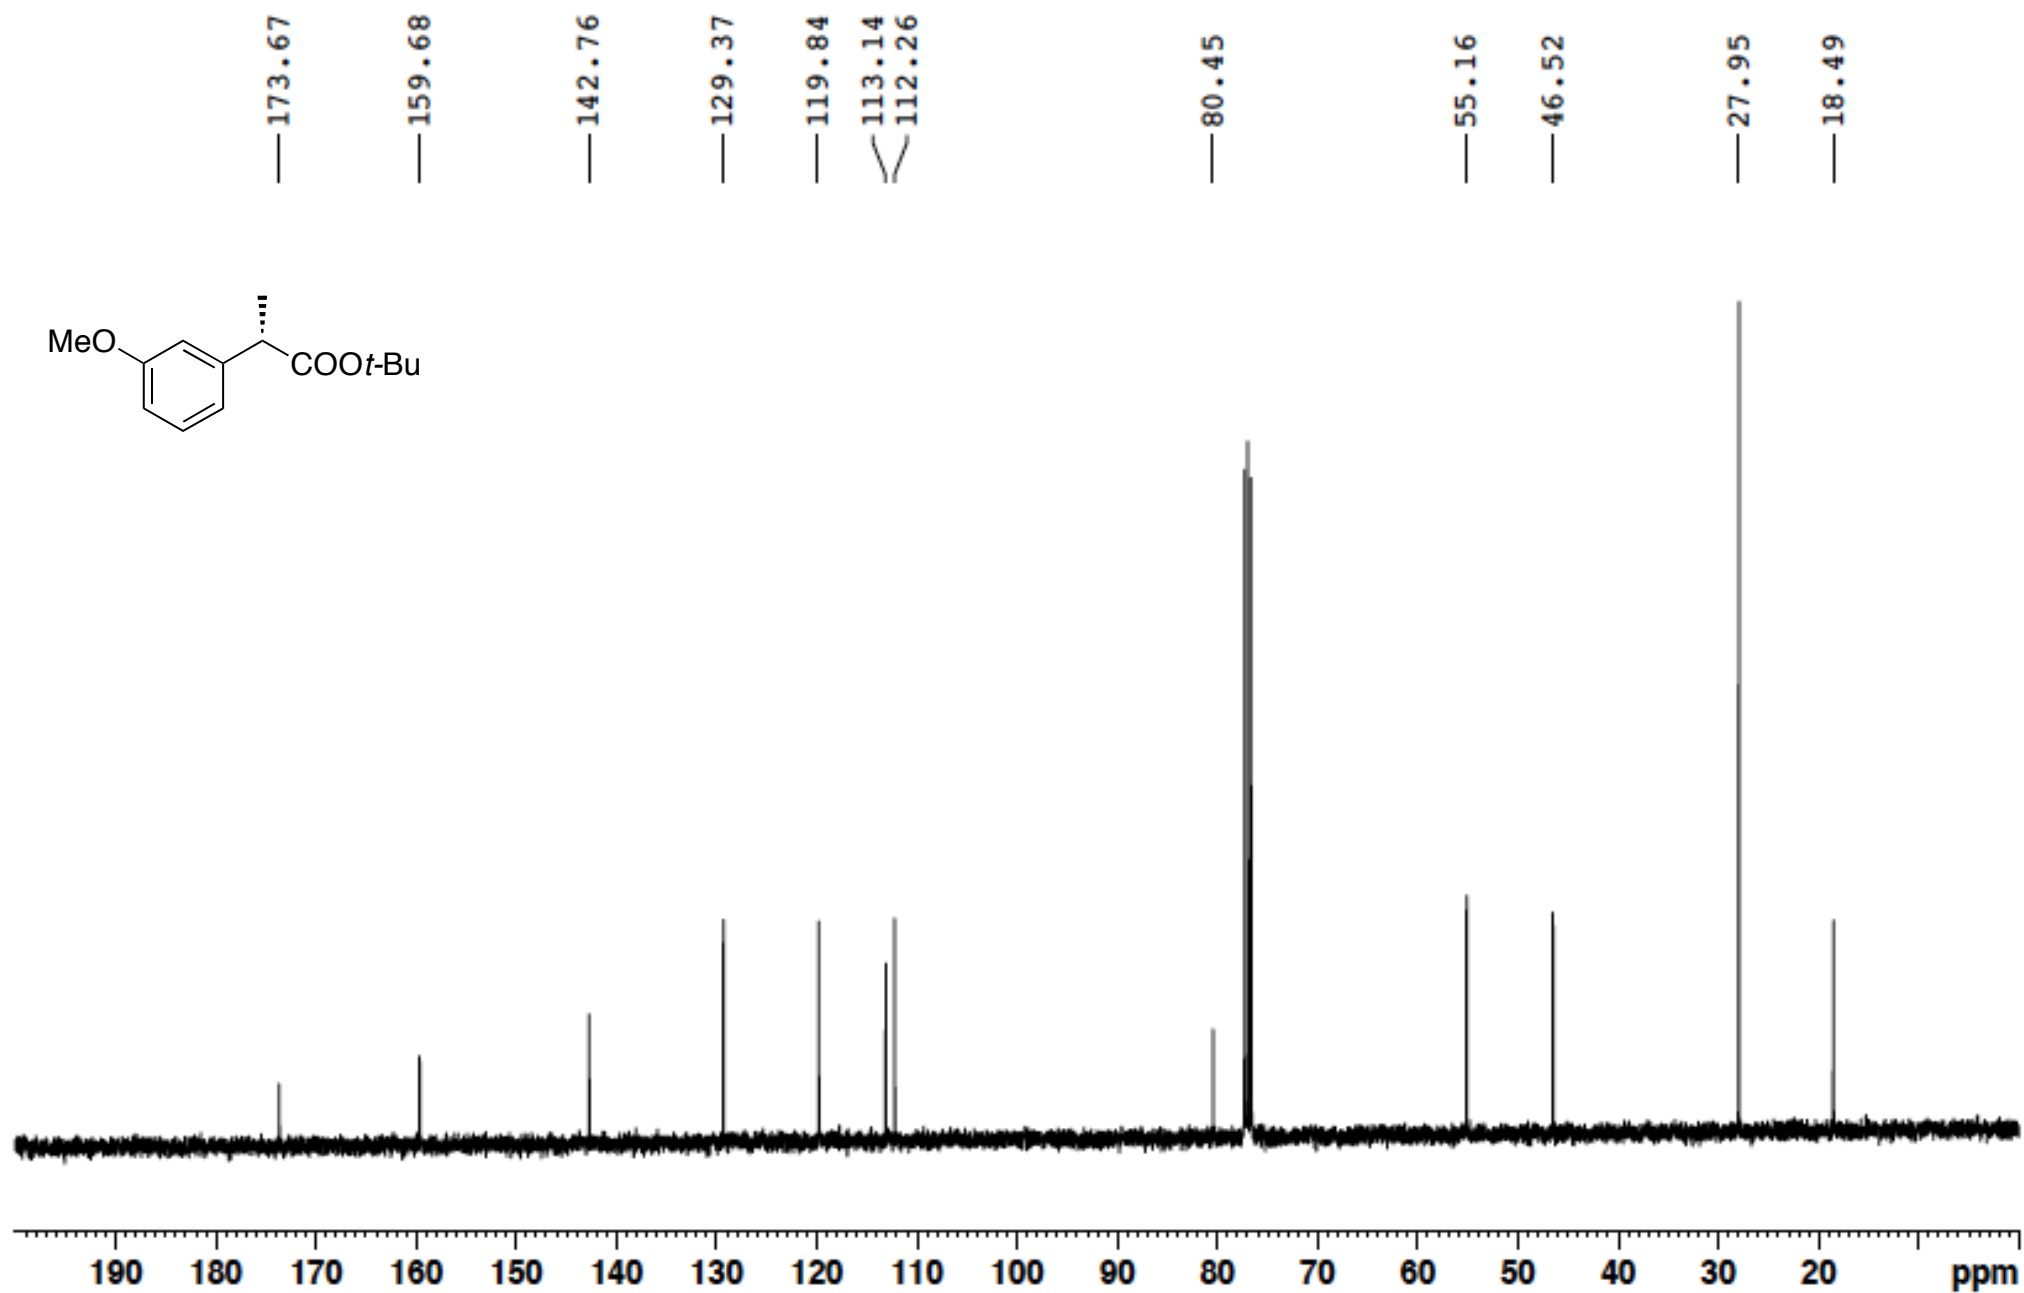

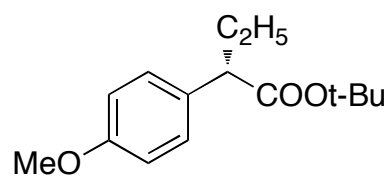

7.259  
7.222  
7.217  
7.206  
7.201  
6.853  
6.848  
6.836  
6.831

3.789  
3.280  
2.055  
2.036  
2.021  
2.016  
2.002  
1.982  
1.734  
1.716  
1.700  
1.698  
1.682  
1.663  
1.395  
0.902  
0.884  
0.866  
0.000

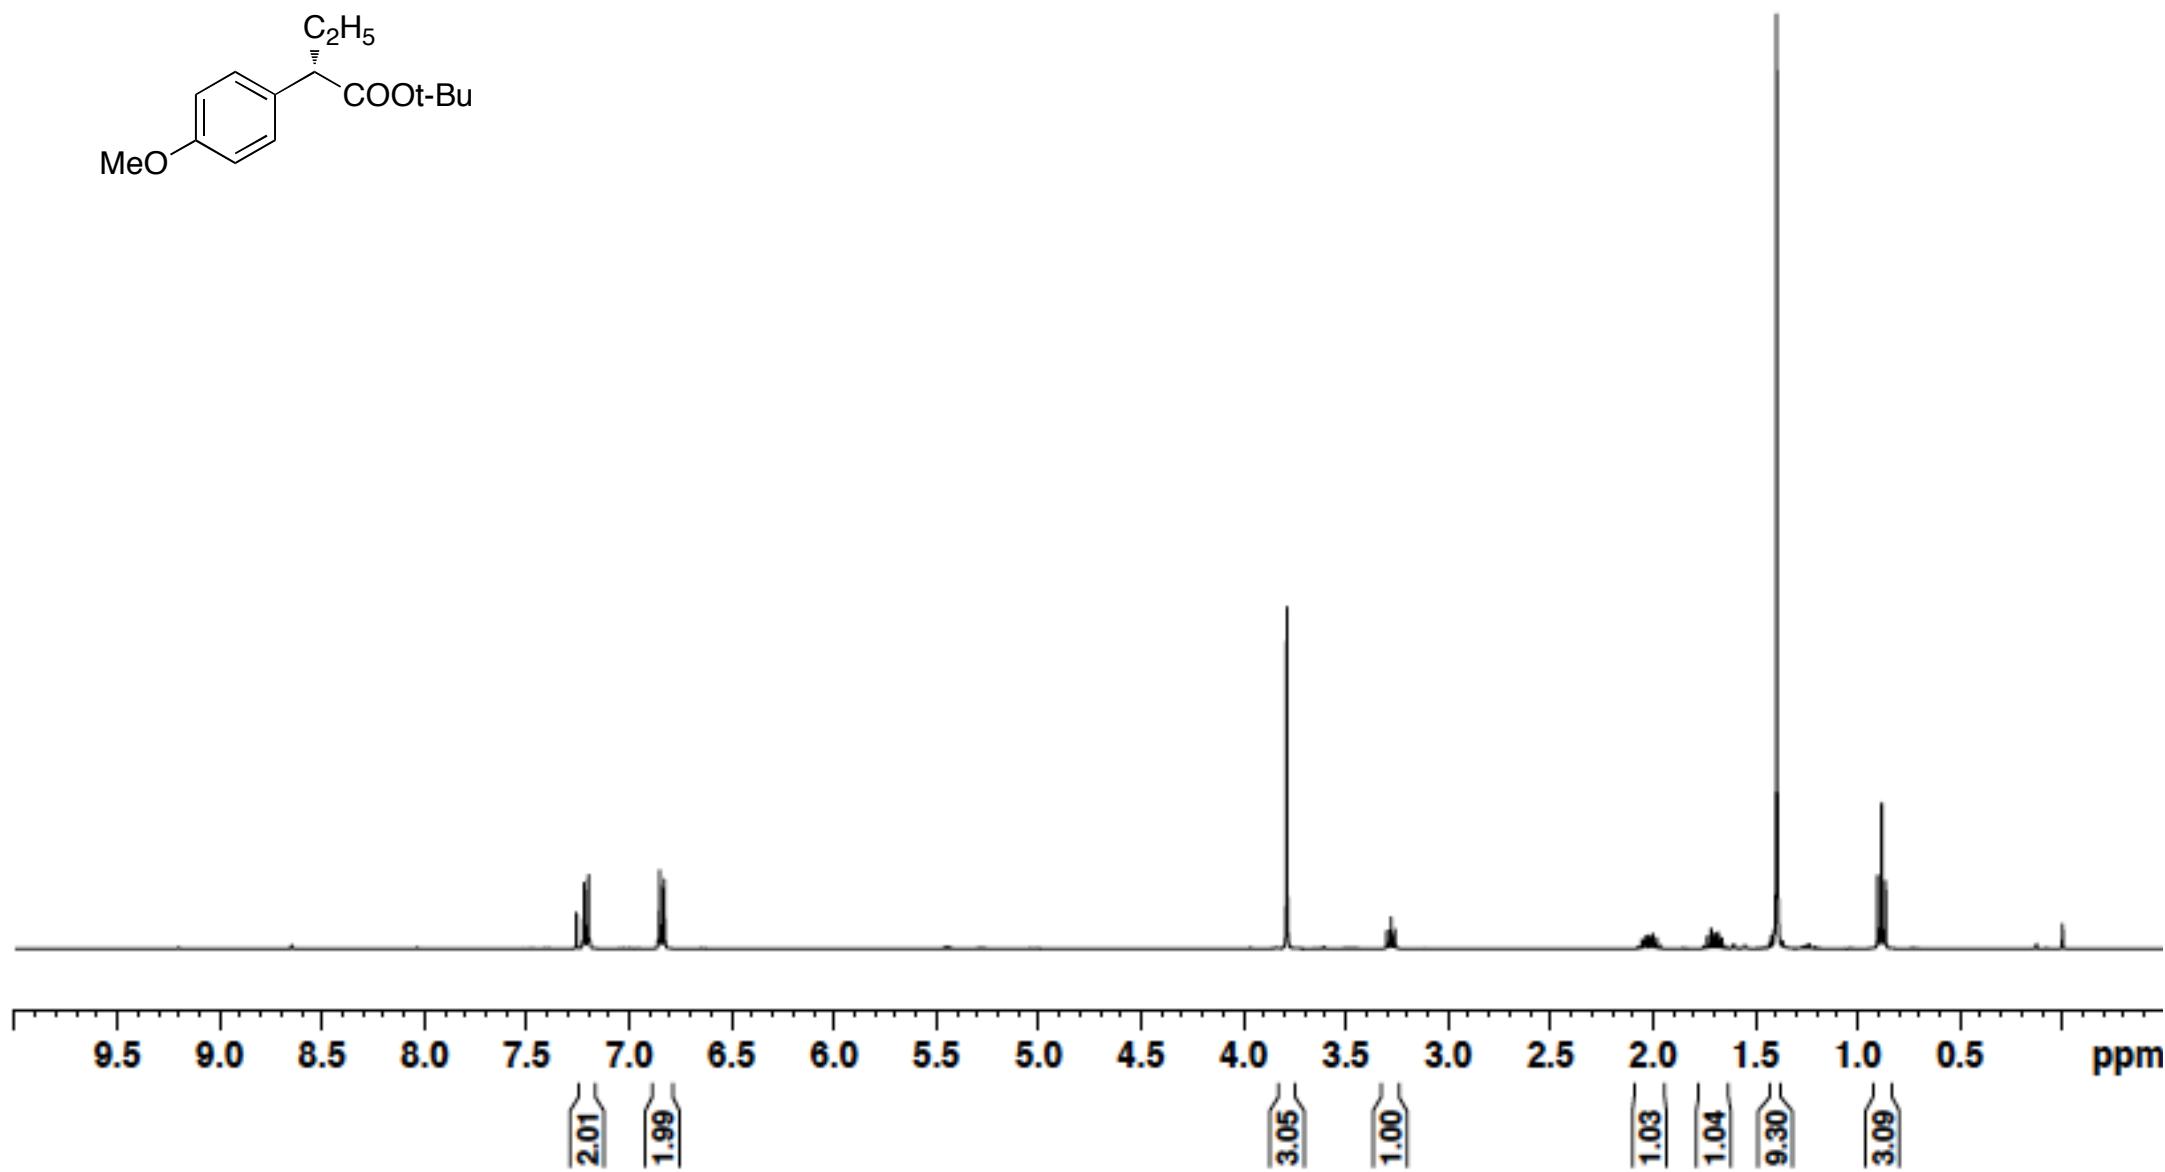

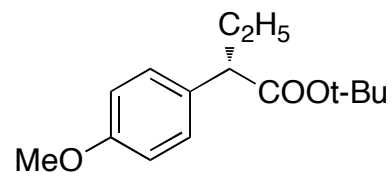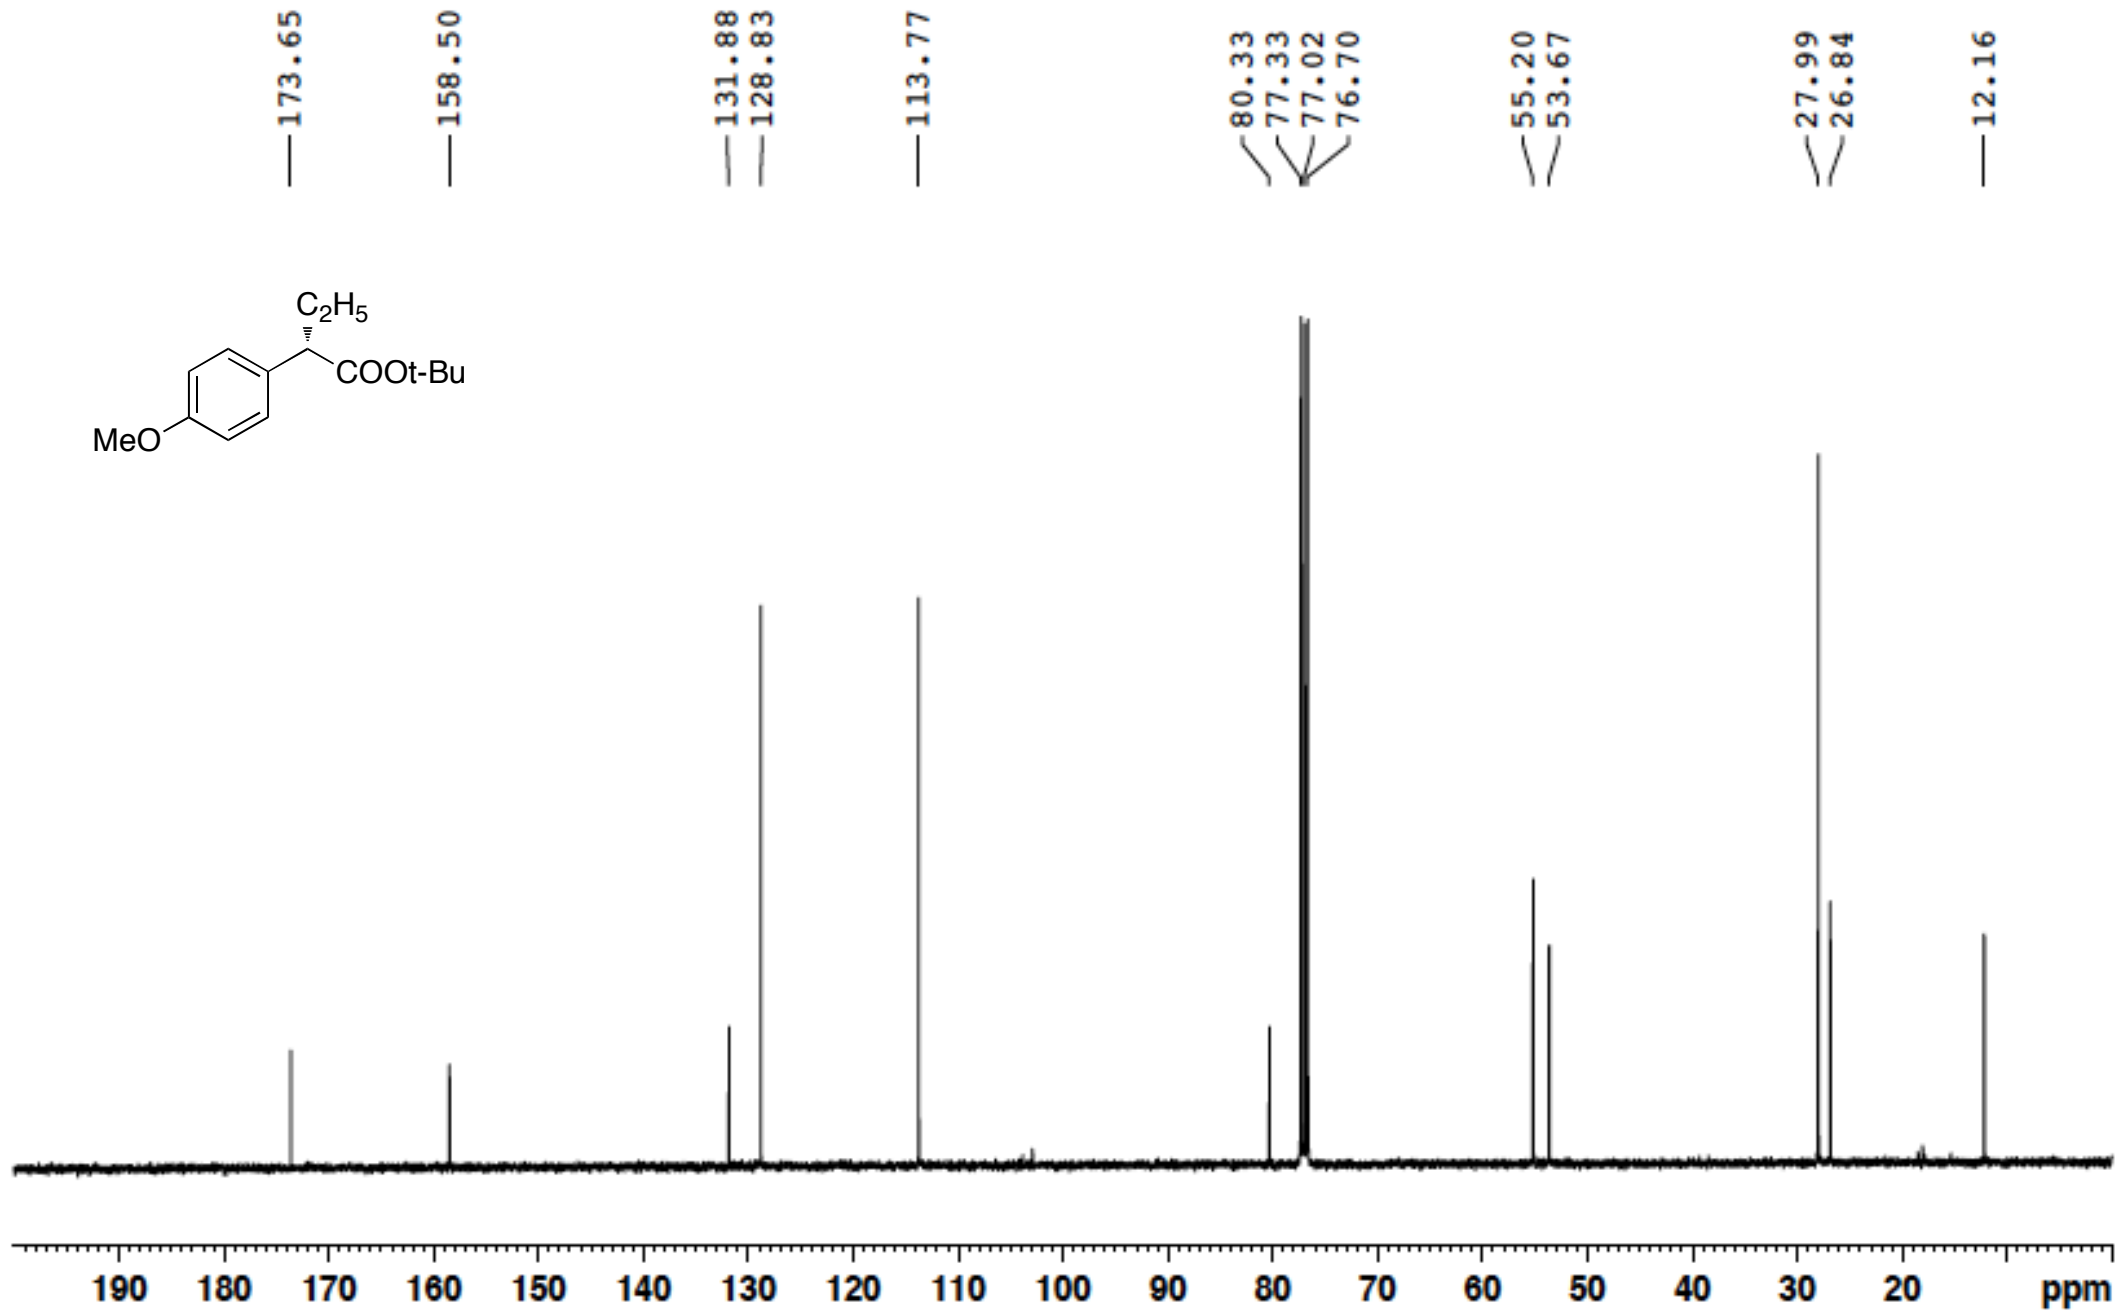



JF12-023 HNMR  
BBF01 CDCl3  
2014-01-02

S73

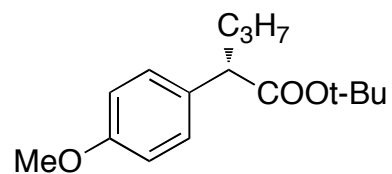

7.260  
7.224  
7.219  
7.207  
7.202  
6.850  
6.845  
6.833  
6.828

3.790  
3.400  
3.381  
3.361  
2.016  
2.000  
1.994  
1.980  
1.973  
1.968  
1.962  
1.959  
1.947  
1.944  
1.939  
1.924  
1.698  
1.683  
1.680  
1.675  
1.665  
1.659  
1.657  
1.648  
1.642  
1.630  
1.626  
1.608  
1.390  
1.325  
1.306  
1.292  
1.288

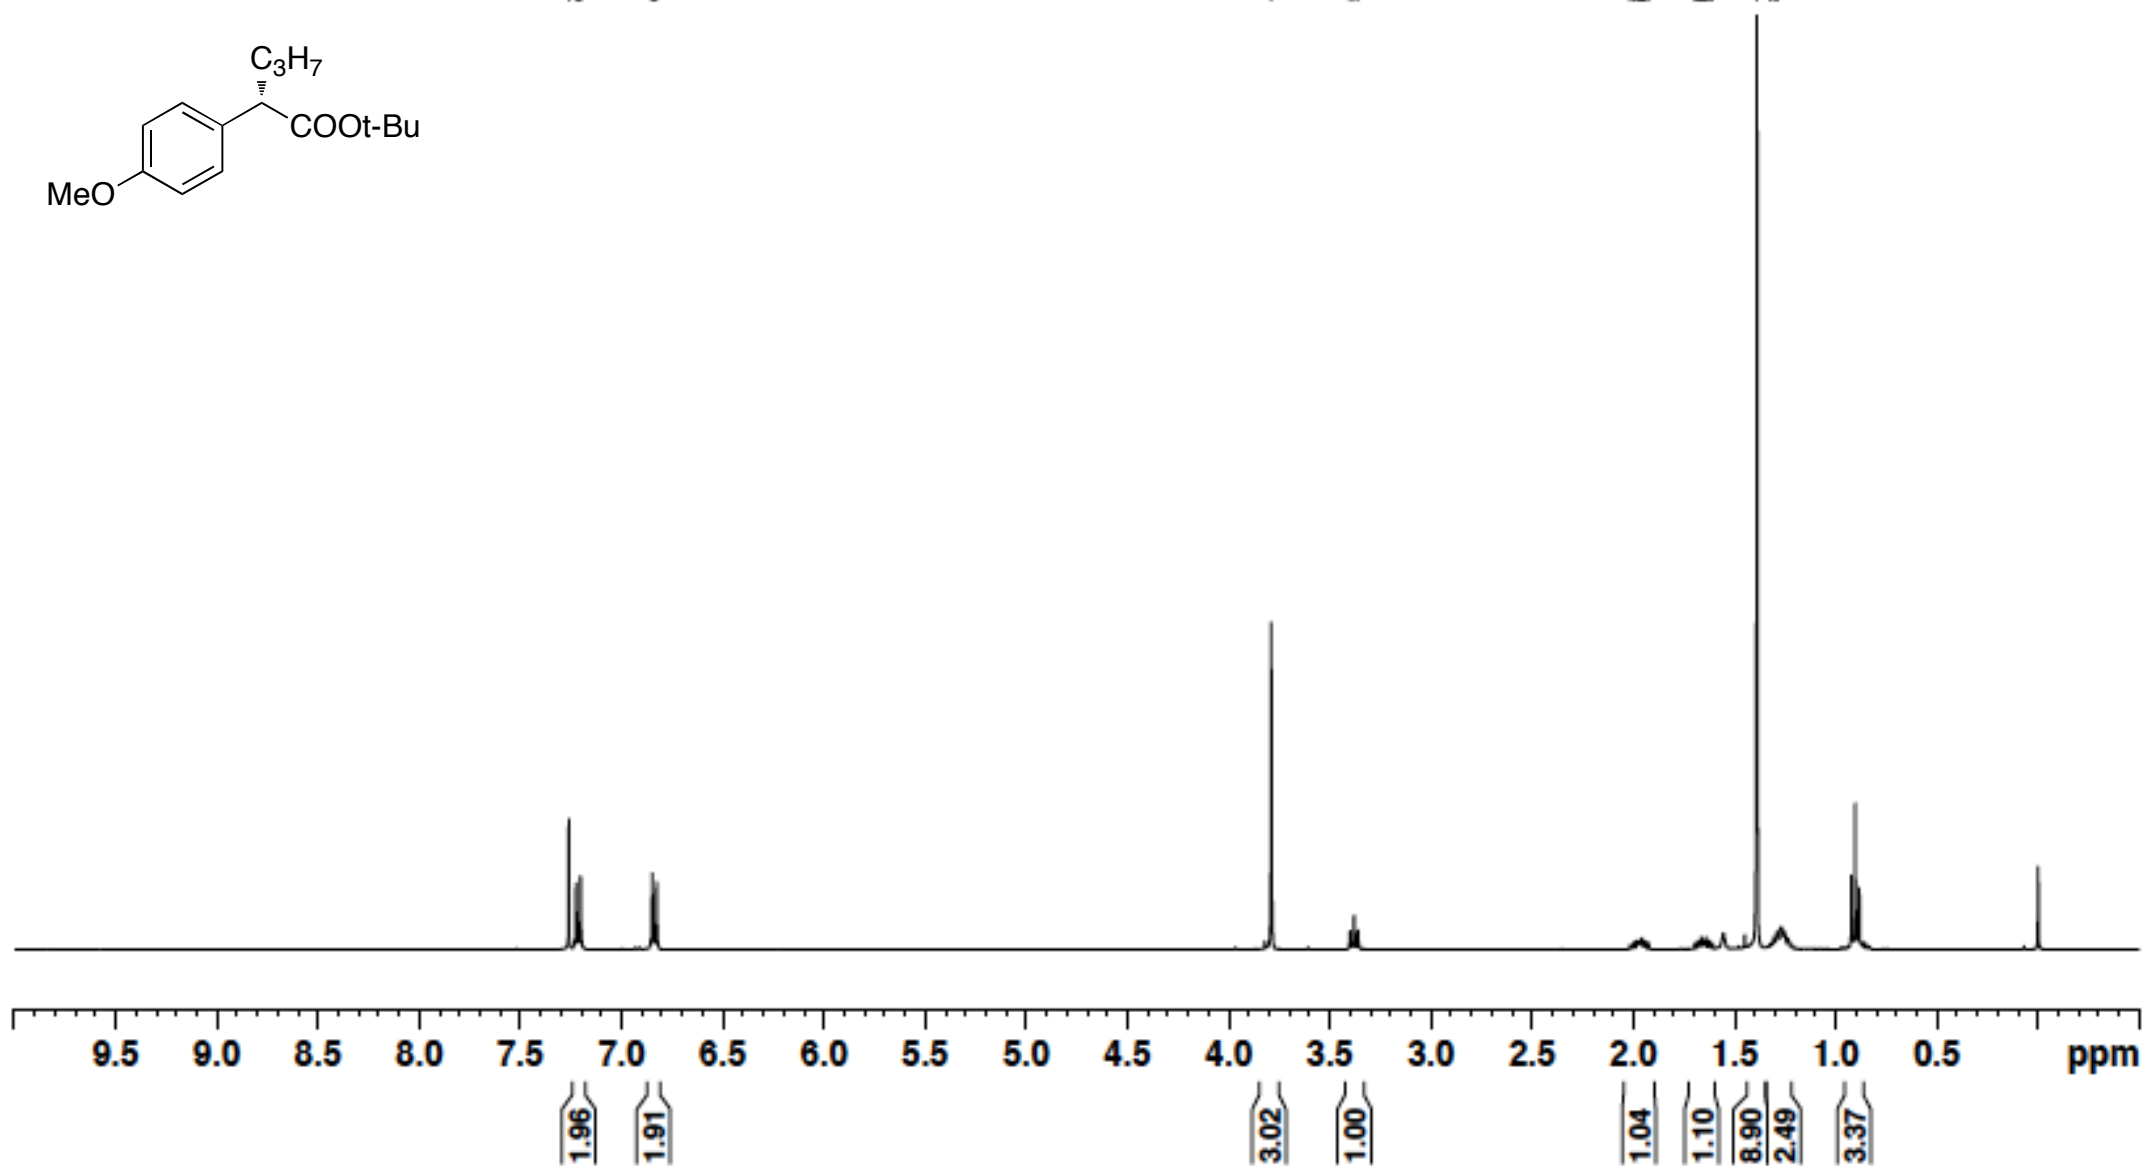

JF12-023 CNMR  
BBFO1 CDCl3  
2014-01-02

S74

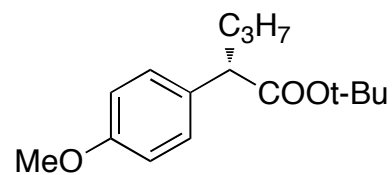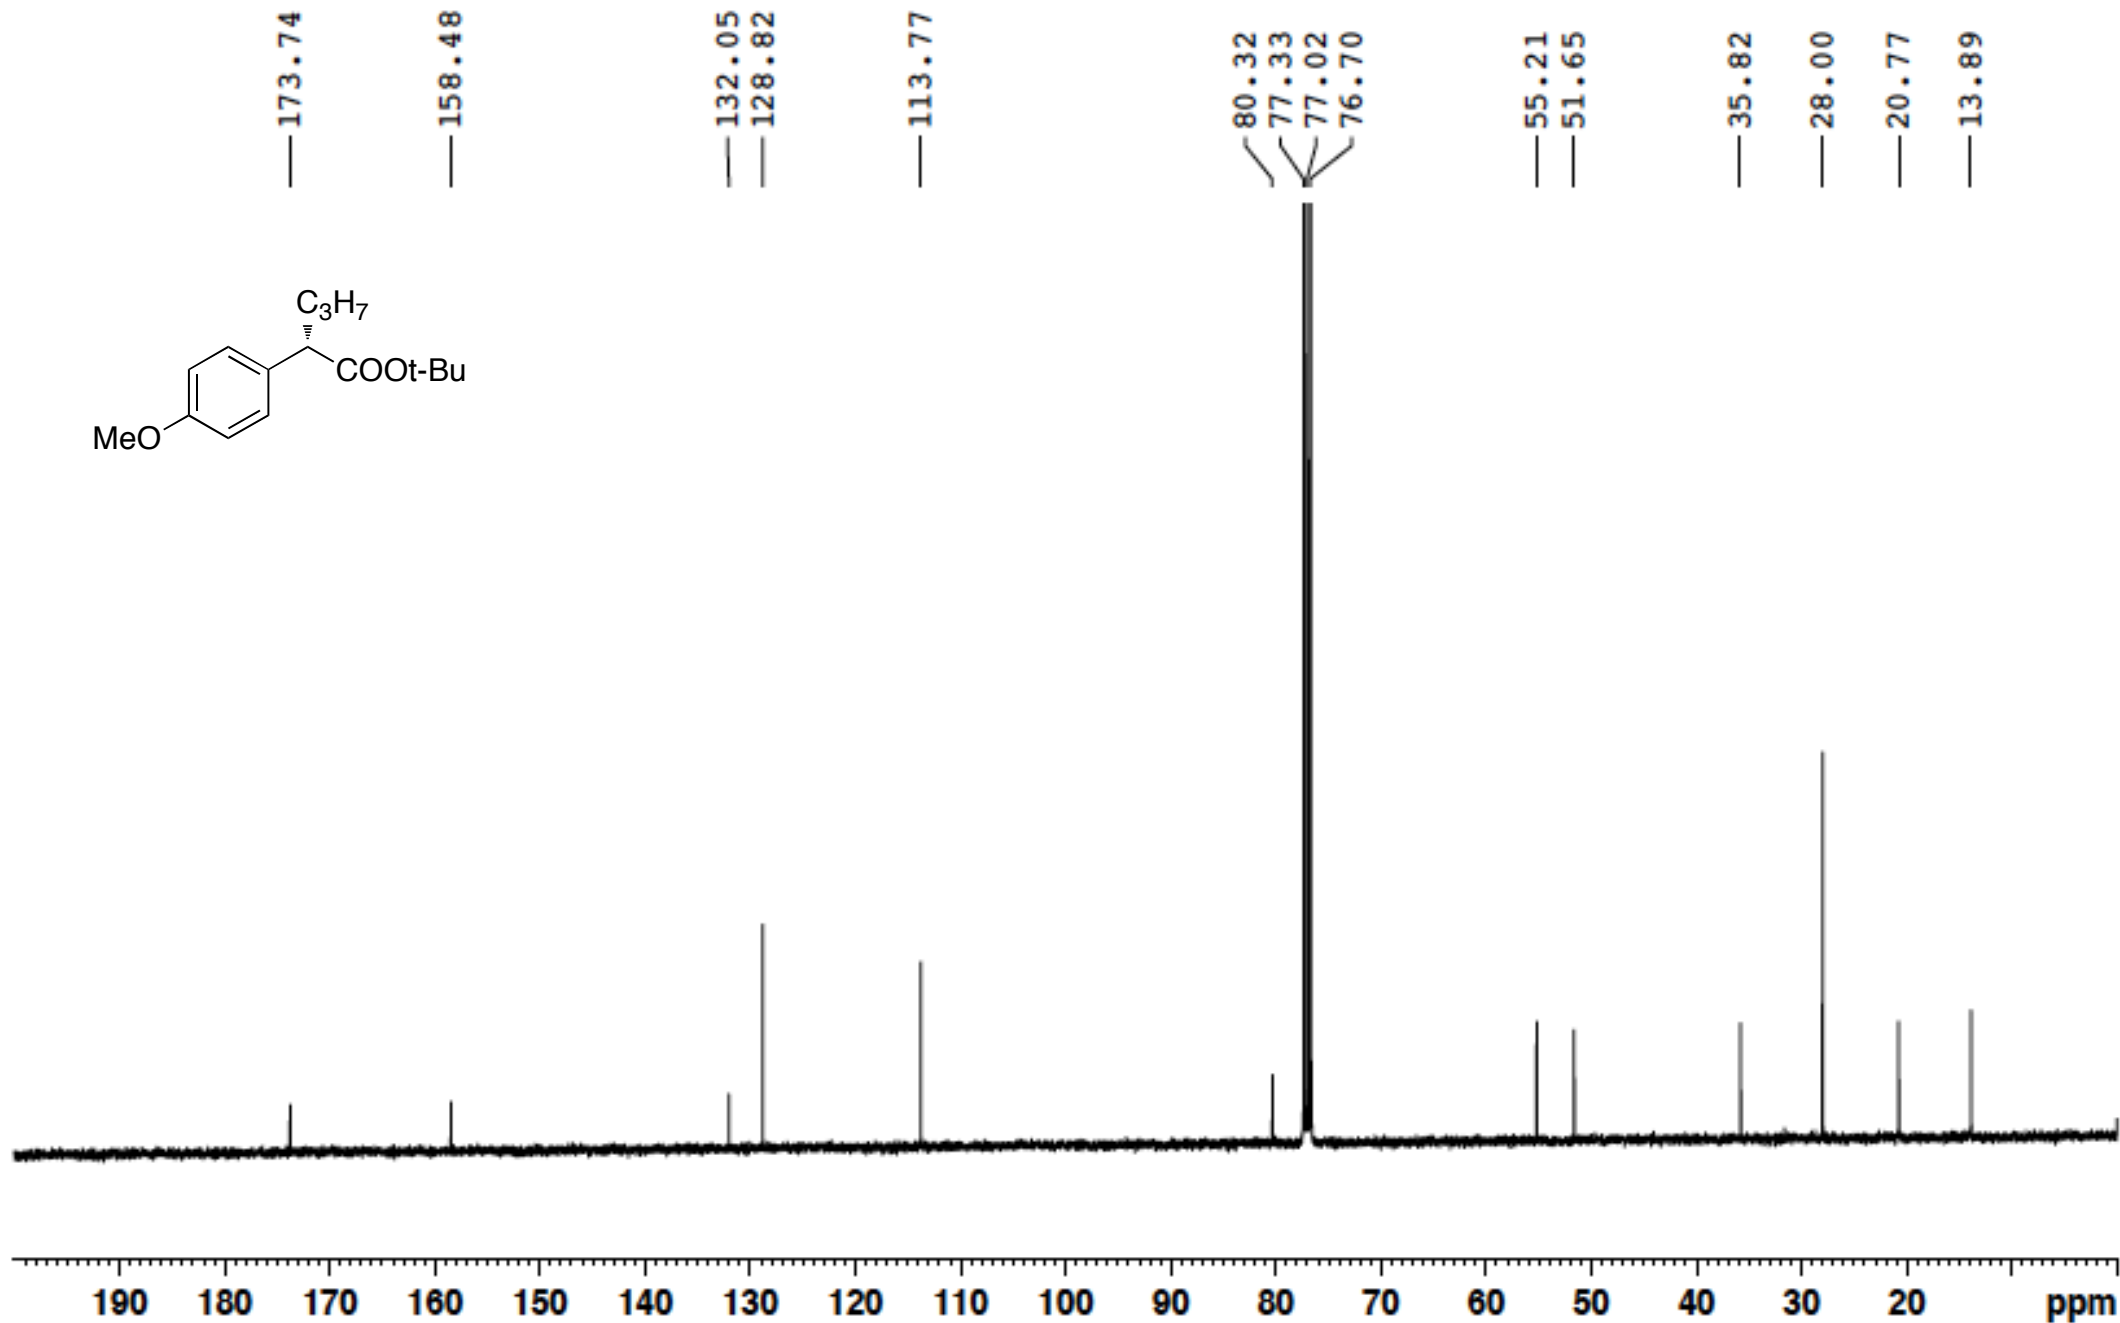

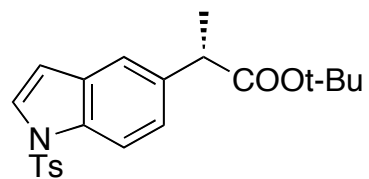

7.918  
7.897  
7.769  
7.748  
7.536  
7.527  
7.440  
7.437  
7.256  
7.252  
7.234  
7.230  
7.221  
7.200  
6.611  
6.601

3.688  
3.670  
3.652  
3.635

2.332

1.460  
1.442  
1.432  
1.373

0.000

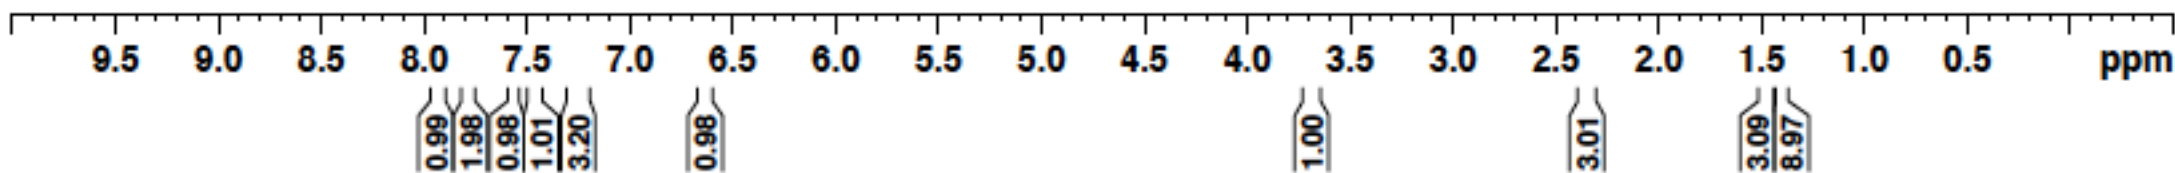

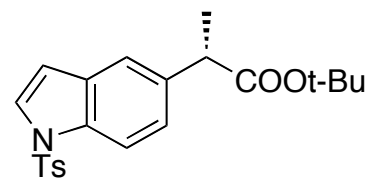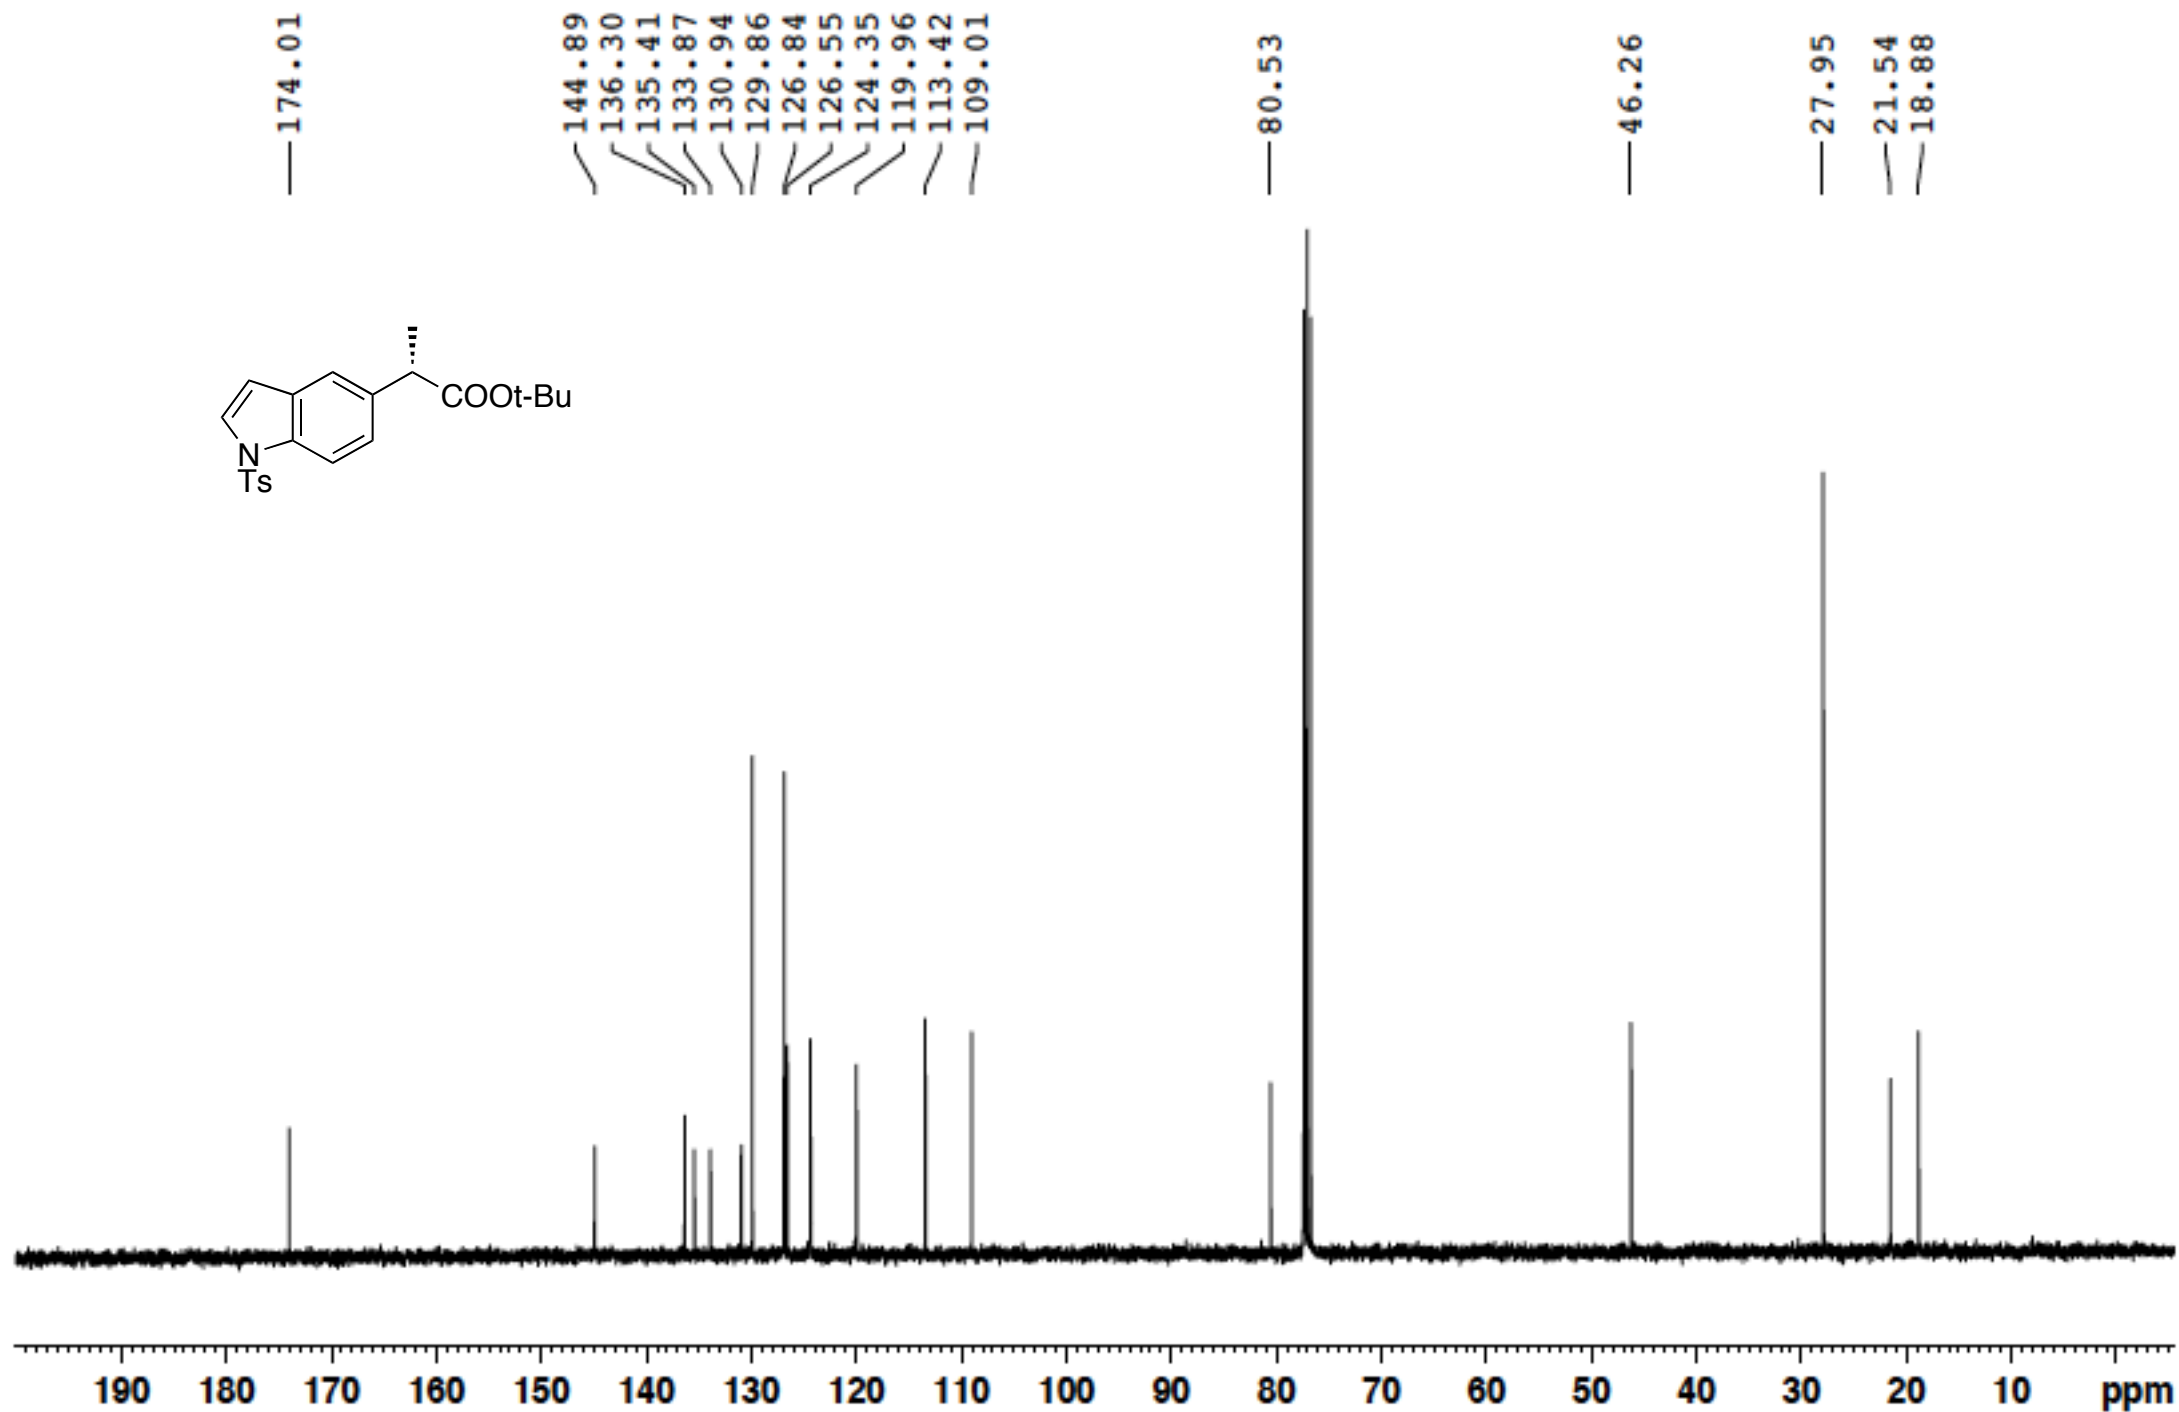

JF11-39-4 <sup>1</sup>HNMR, CDCl<sub>3</sub>, BBO1  
2013-07-22

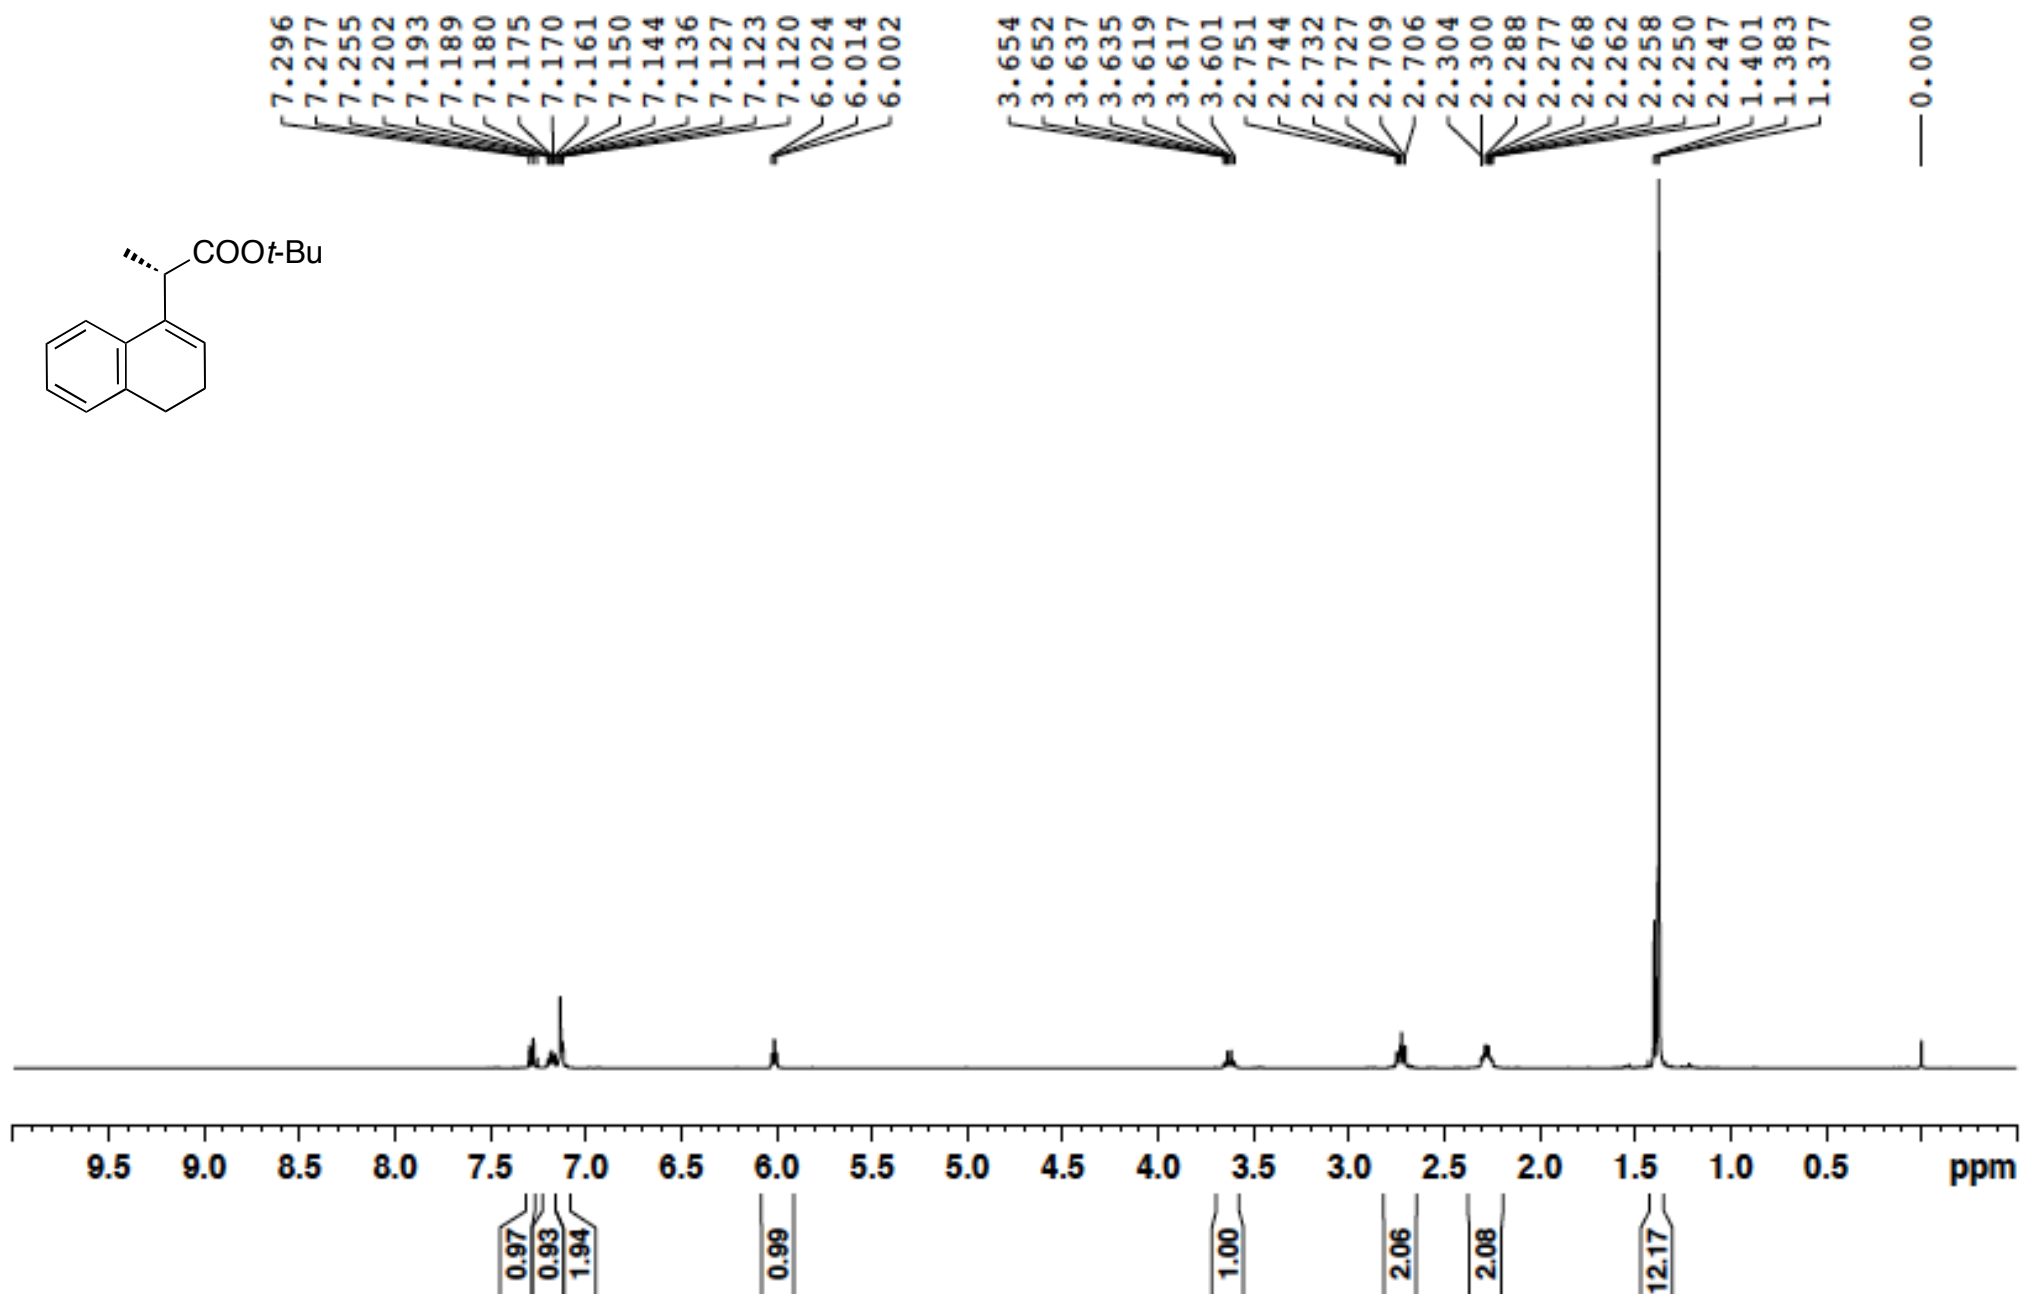

JF11-39-4 <sup>13</sup>CNMR, CDCl<sub>3</sub>, BBF01  
2013-07-22

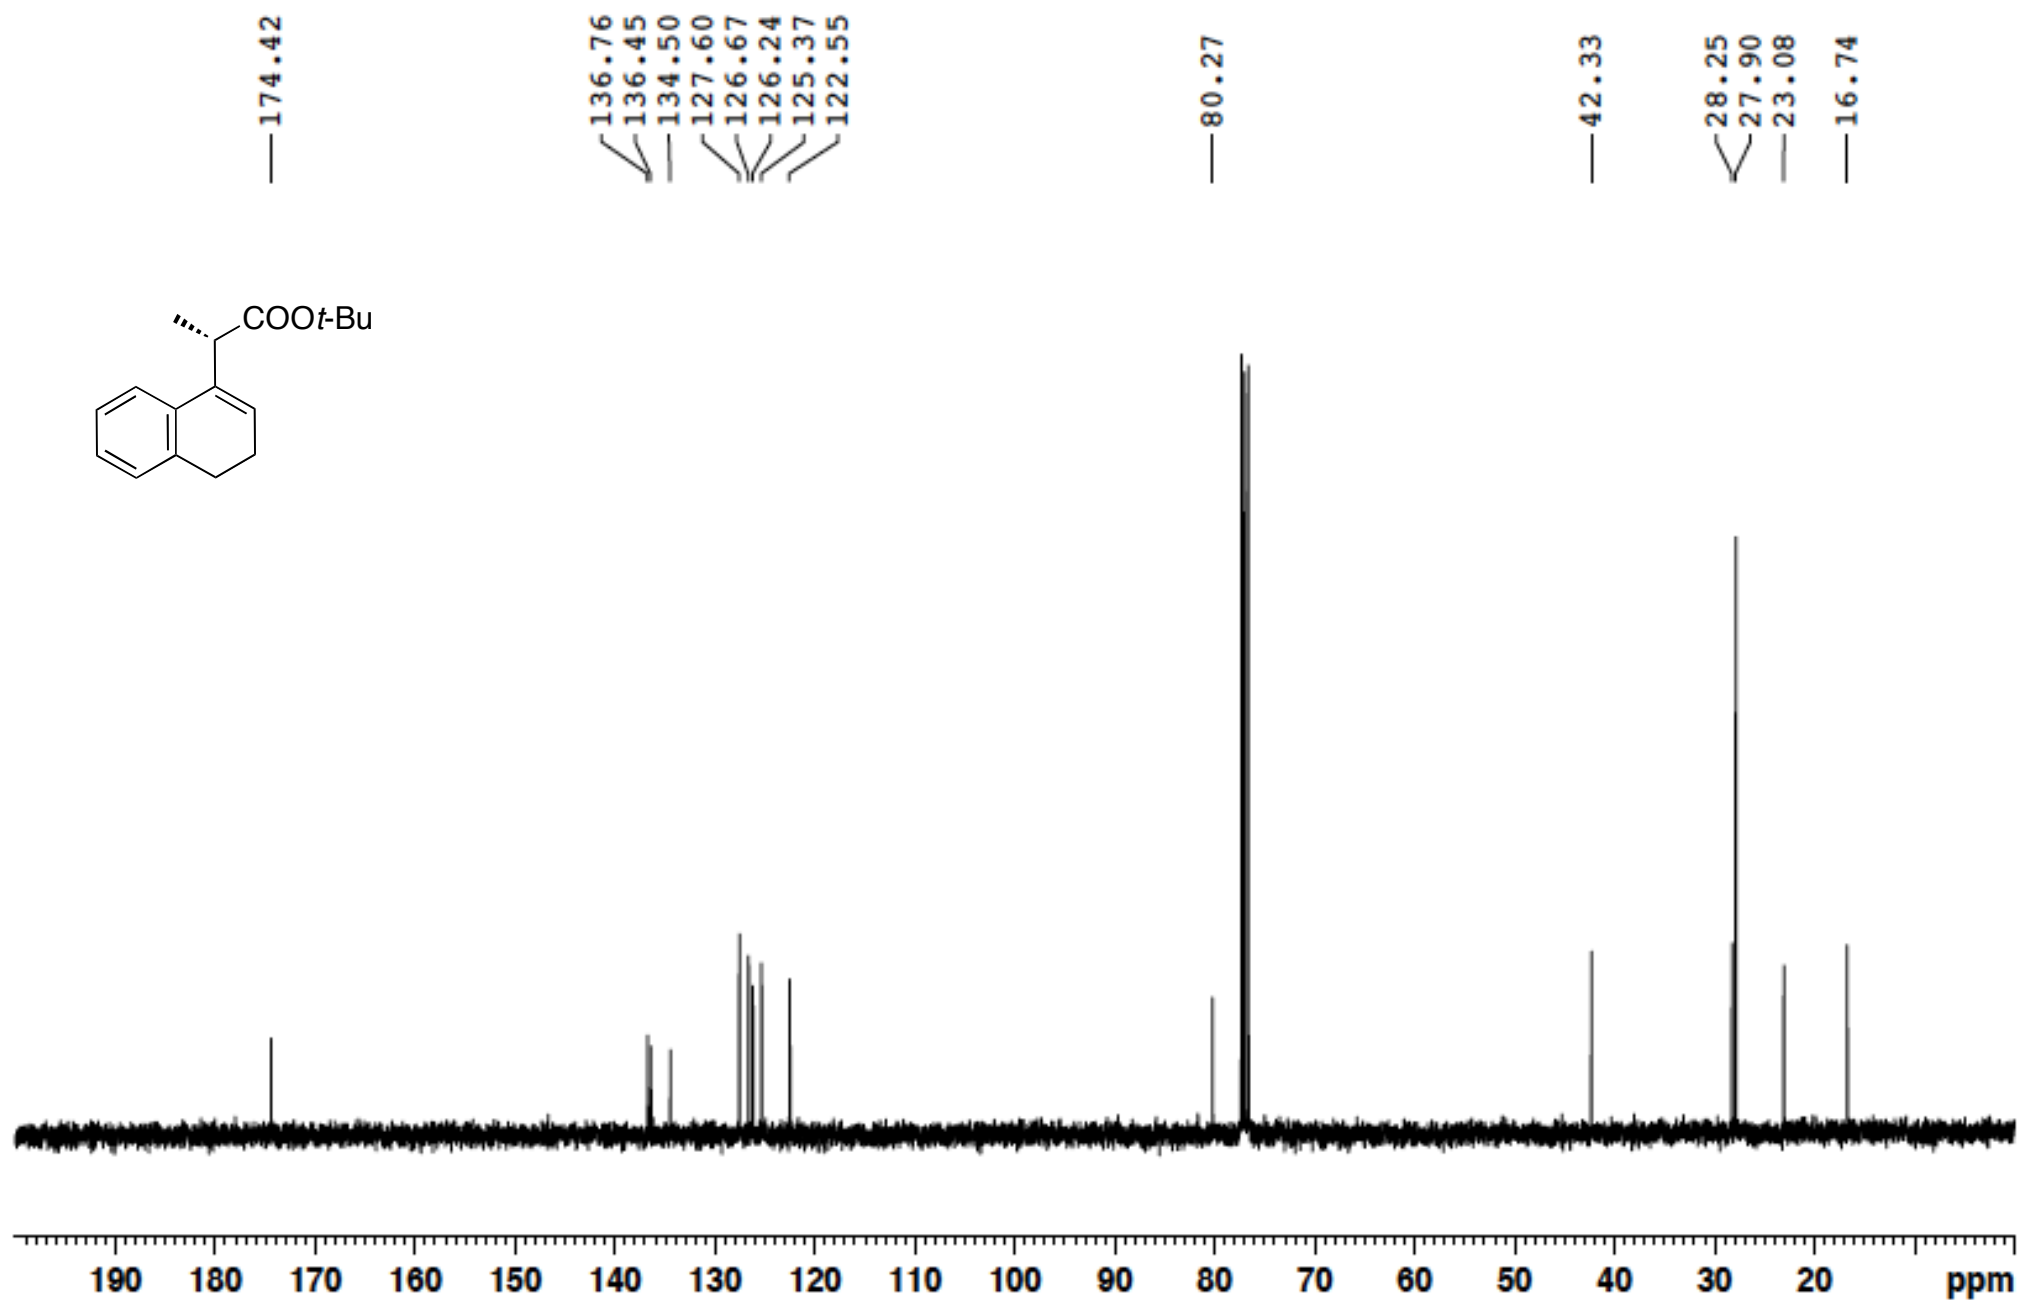

JF11-29-2 1HNMR, CDCl3, BBF01  
2013-07-22

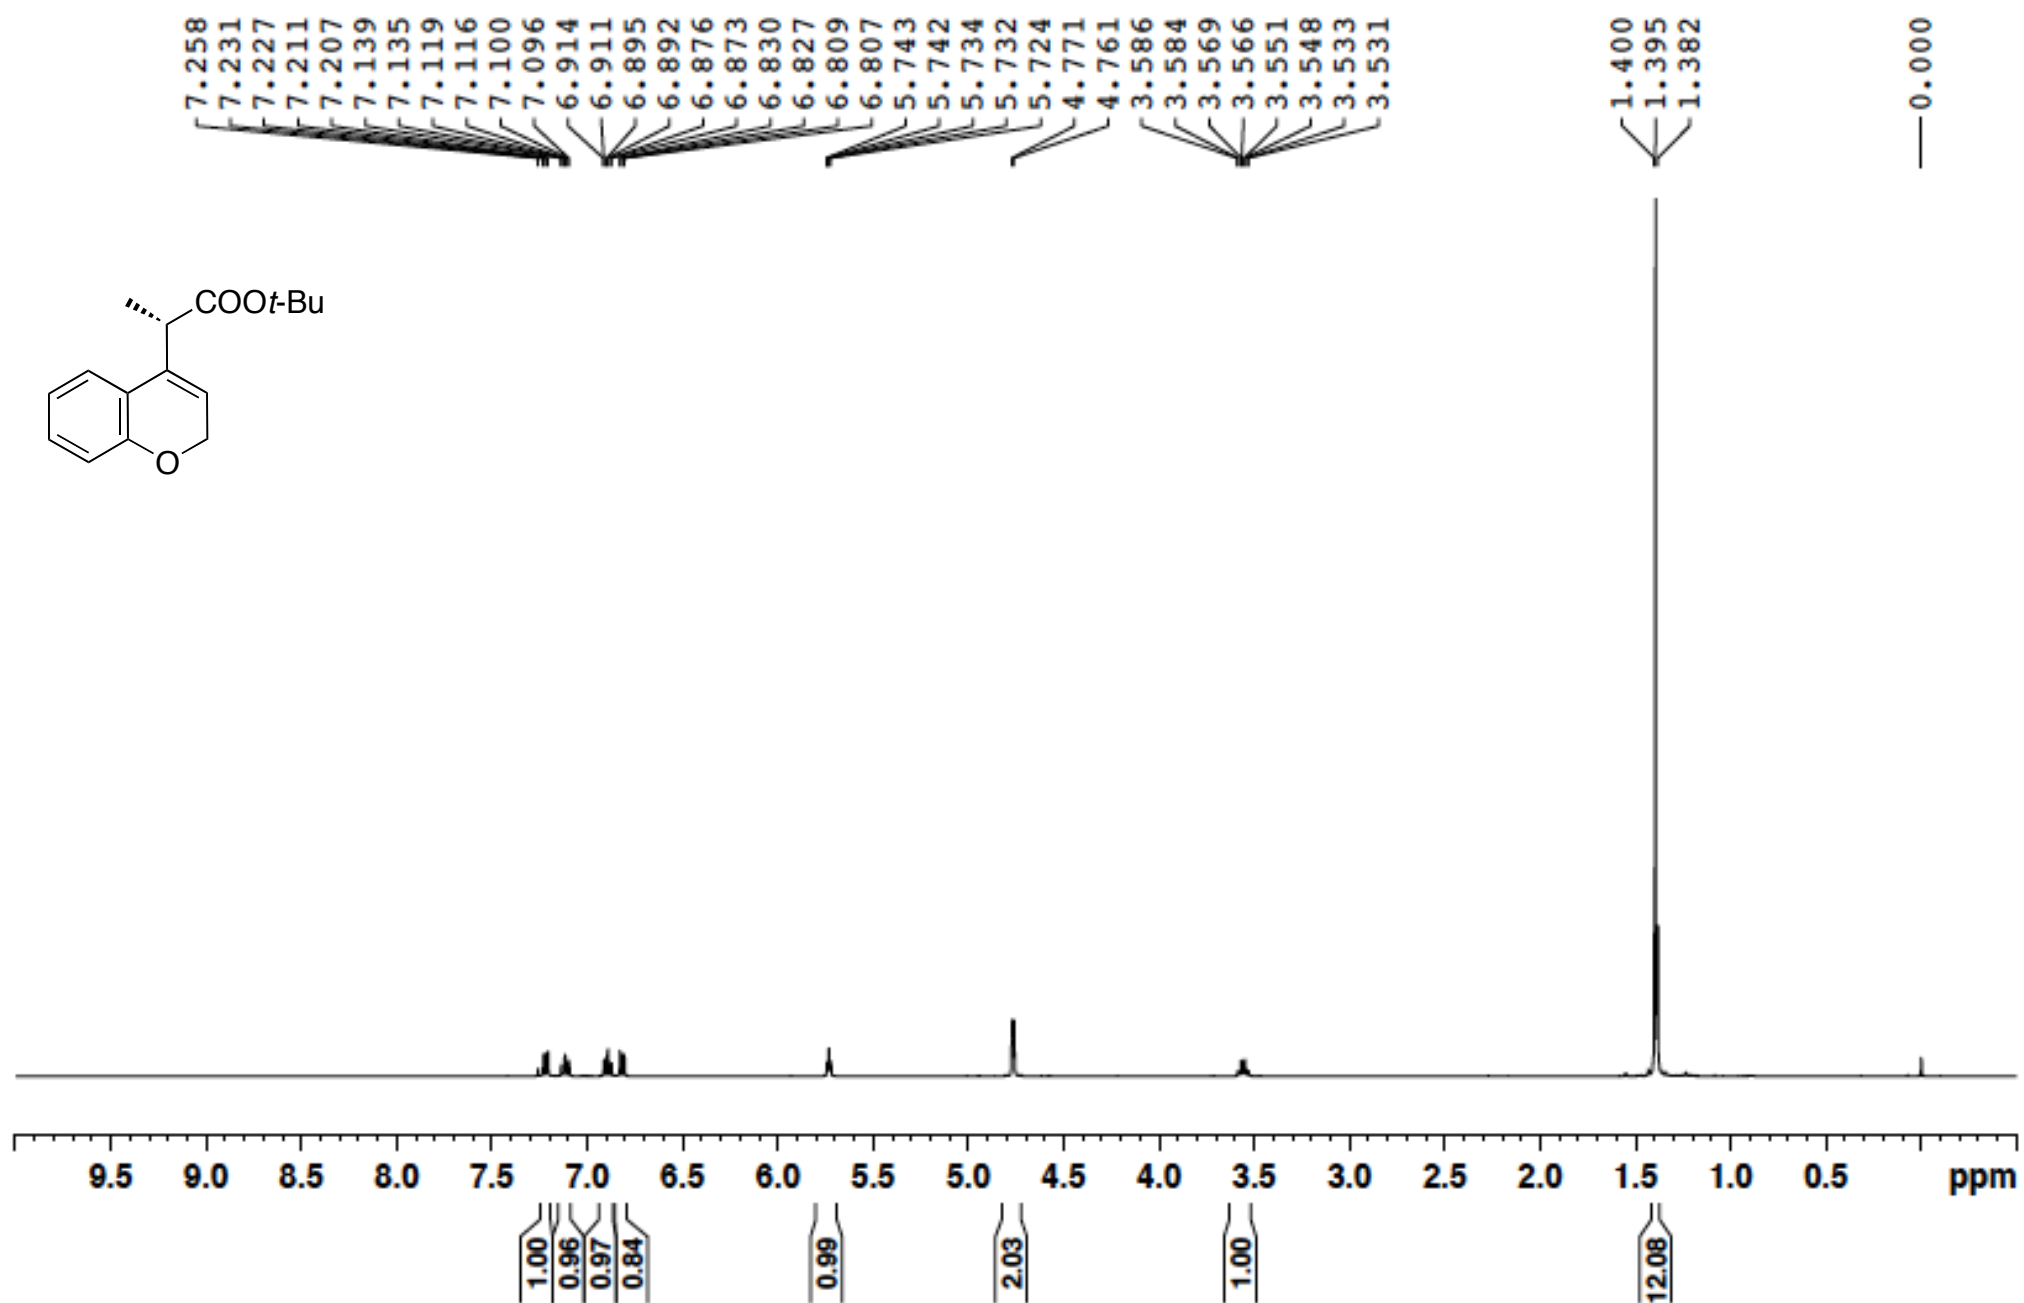

JF11-29-2 <sup>13</sup>CNMR, CDCl<sub>3</sub>, BBF01  
2013-07-22

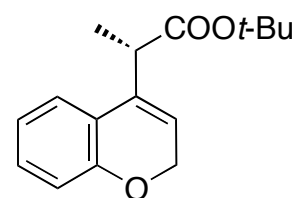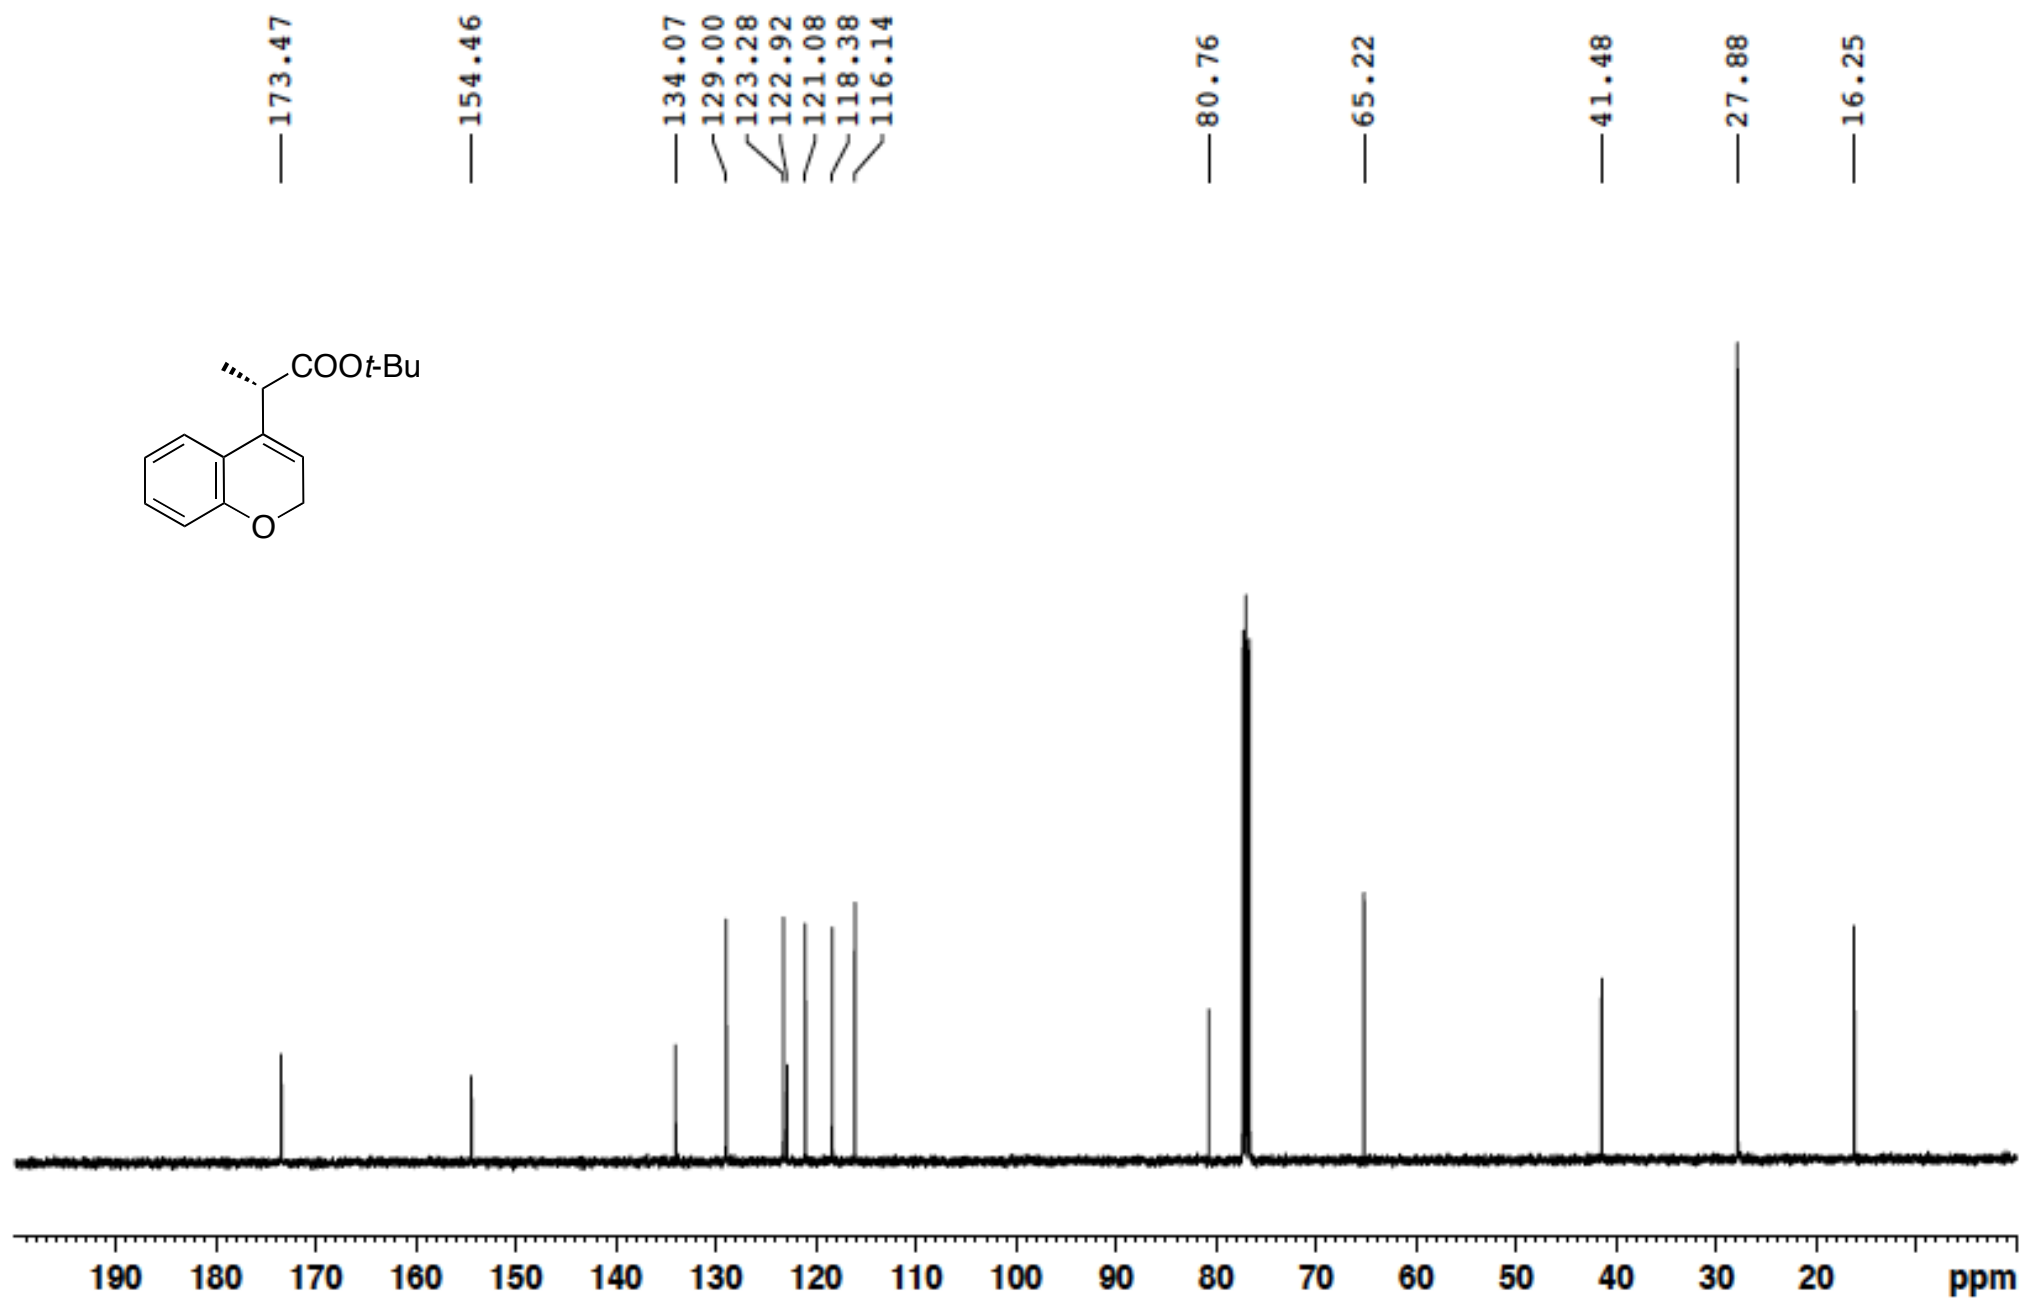



JF11-29-3 <sup>1</sup>HNMR, CDCl<sub>3</sub>, BBO1  
2013-07-22

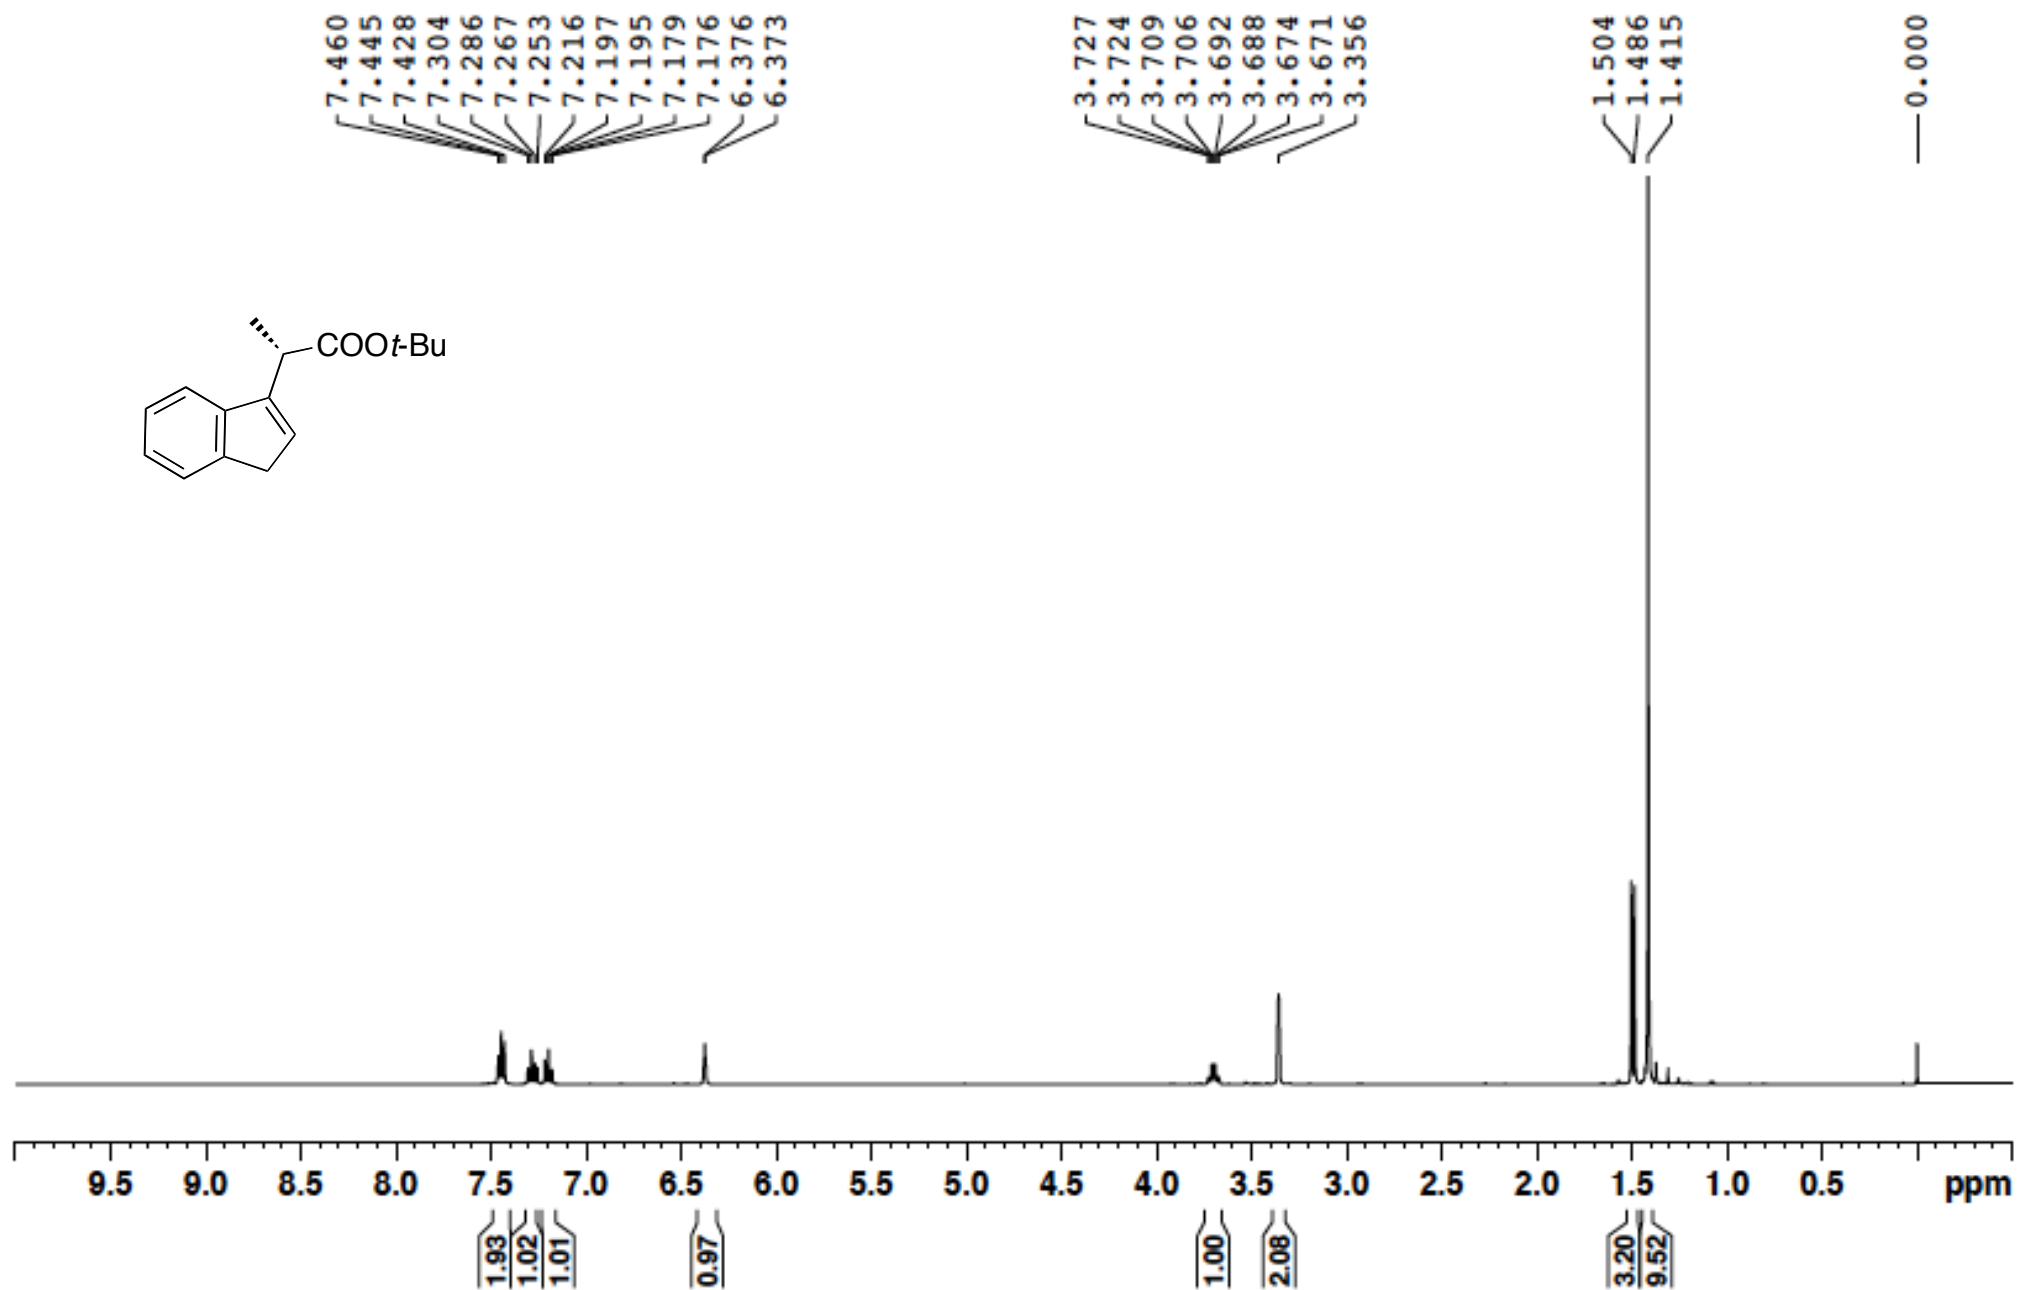

JF11-29-3 <sup>13</sup>CNMR, CDCl<sub>3</sub>, BBF01  
2013-07-22

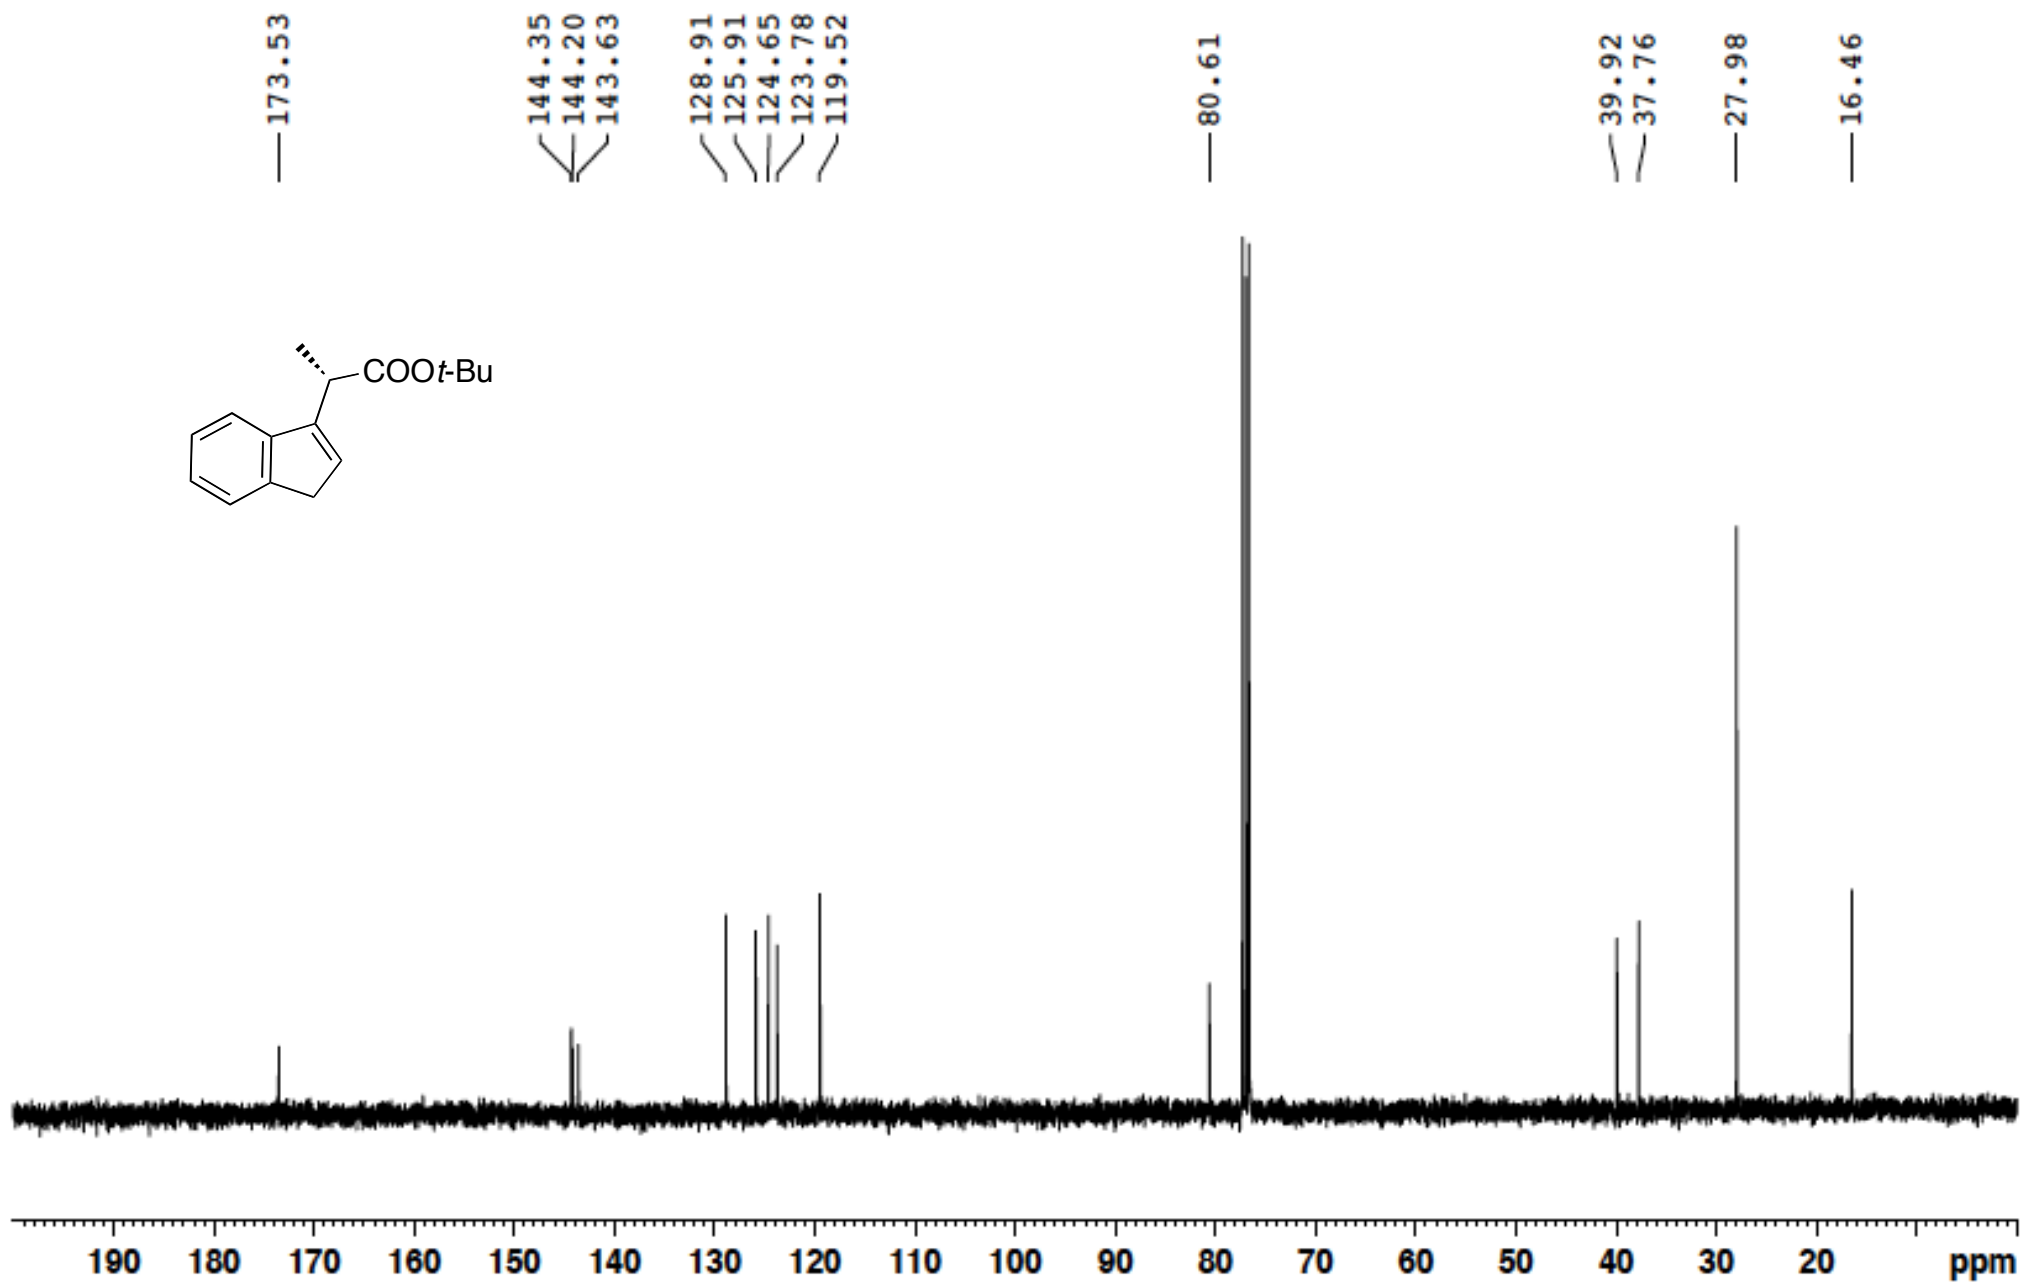

JF11-29-1 1HNMR BBFO1 CDC13  
2013-8-9

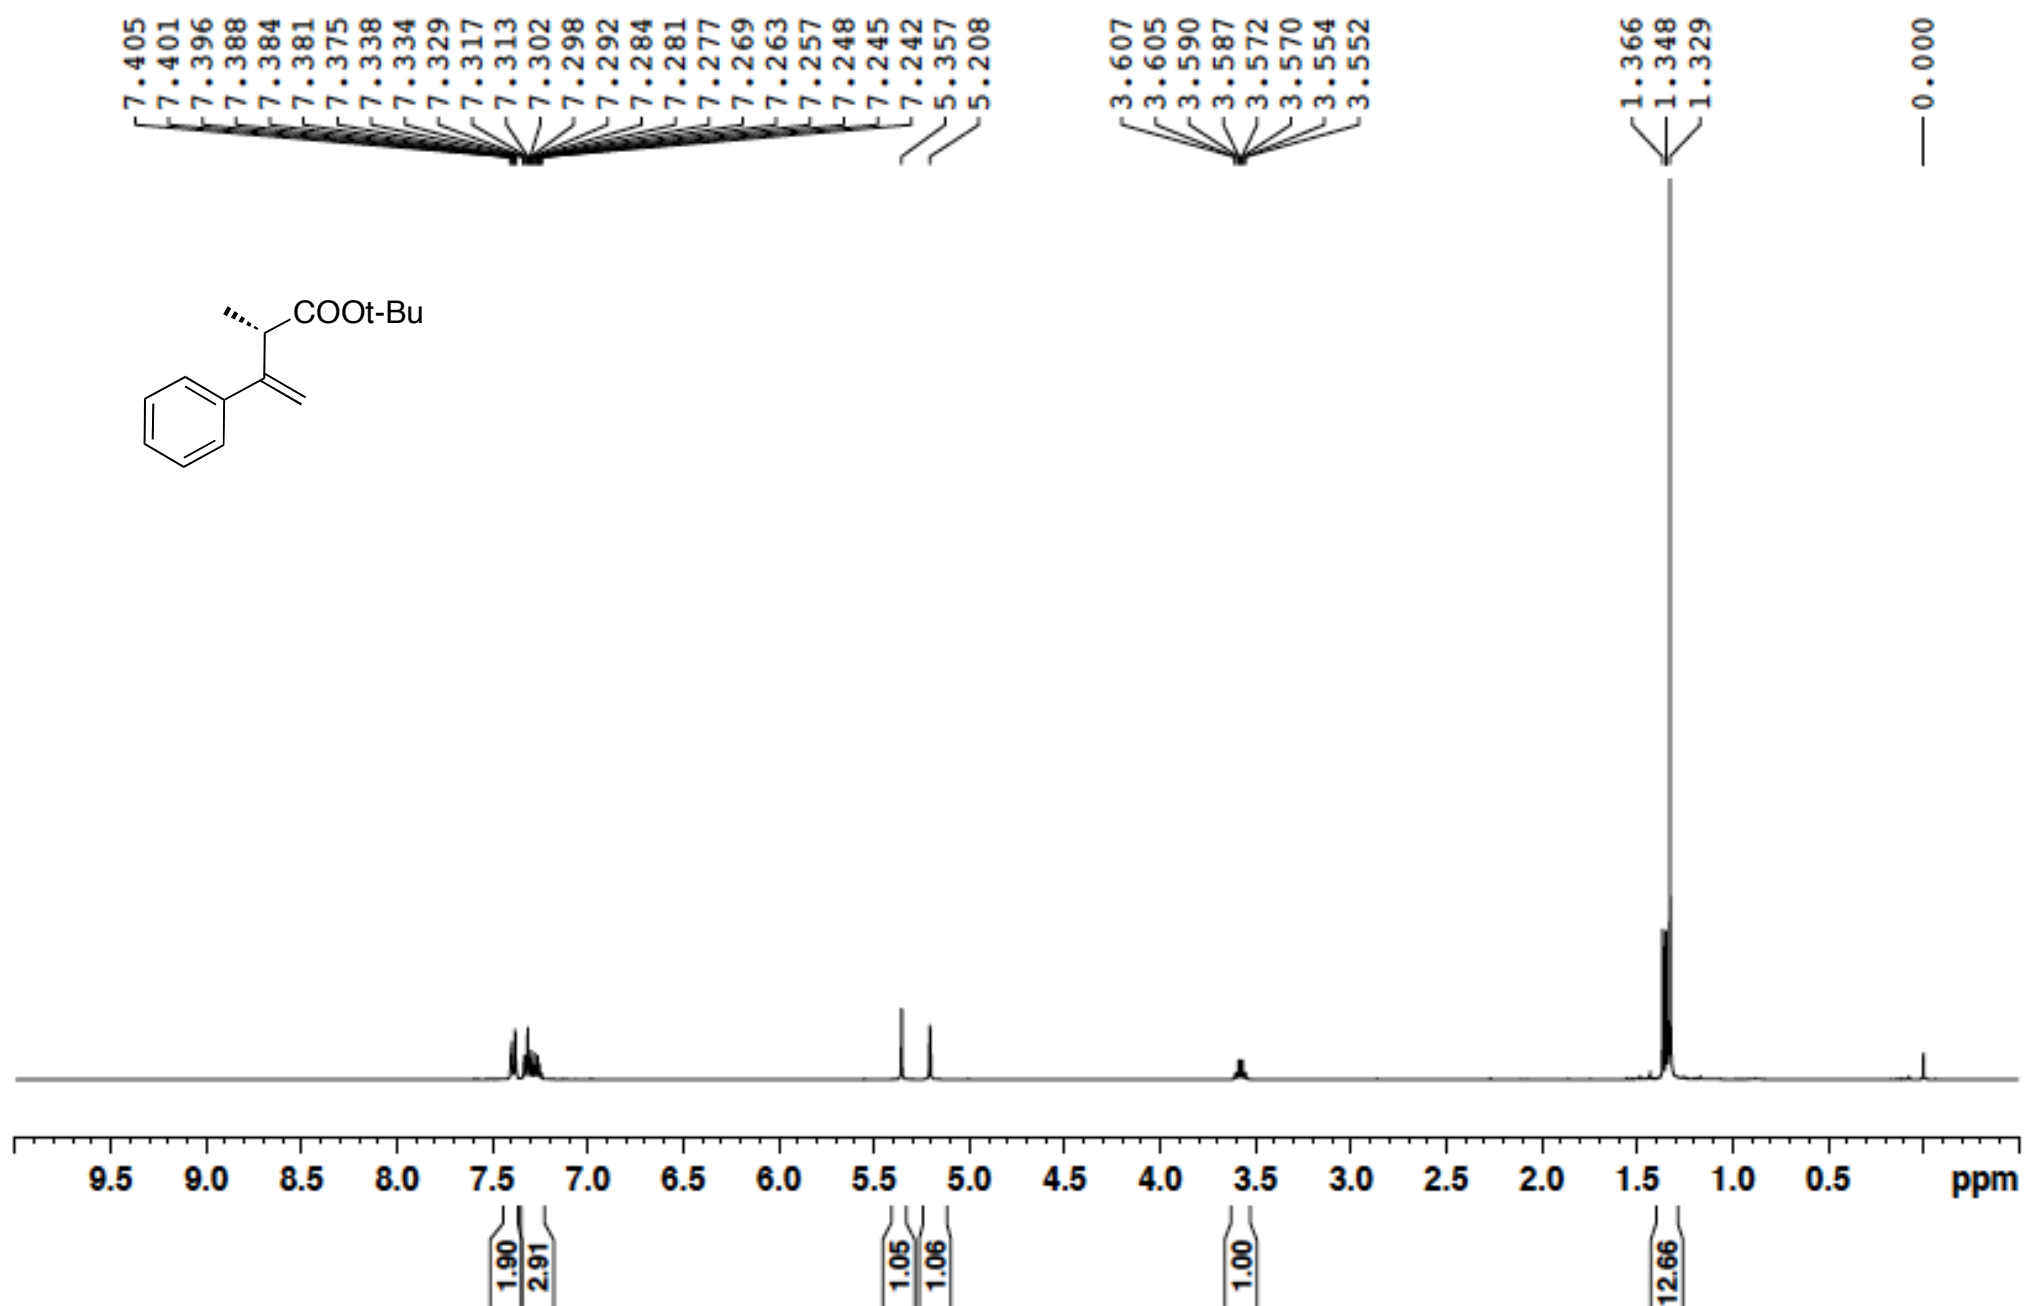

JF11-29-1 CDCl<sub>3</sub> <sup>13</sup>CNMR BBF02  
2013-08-09

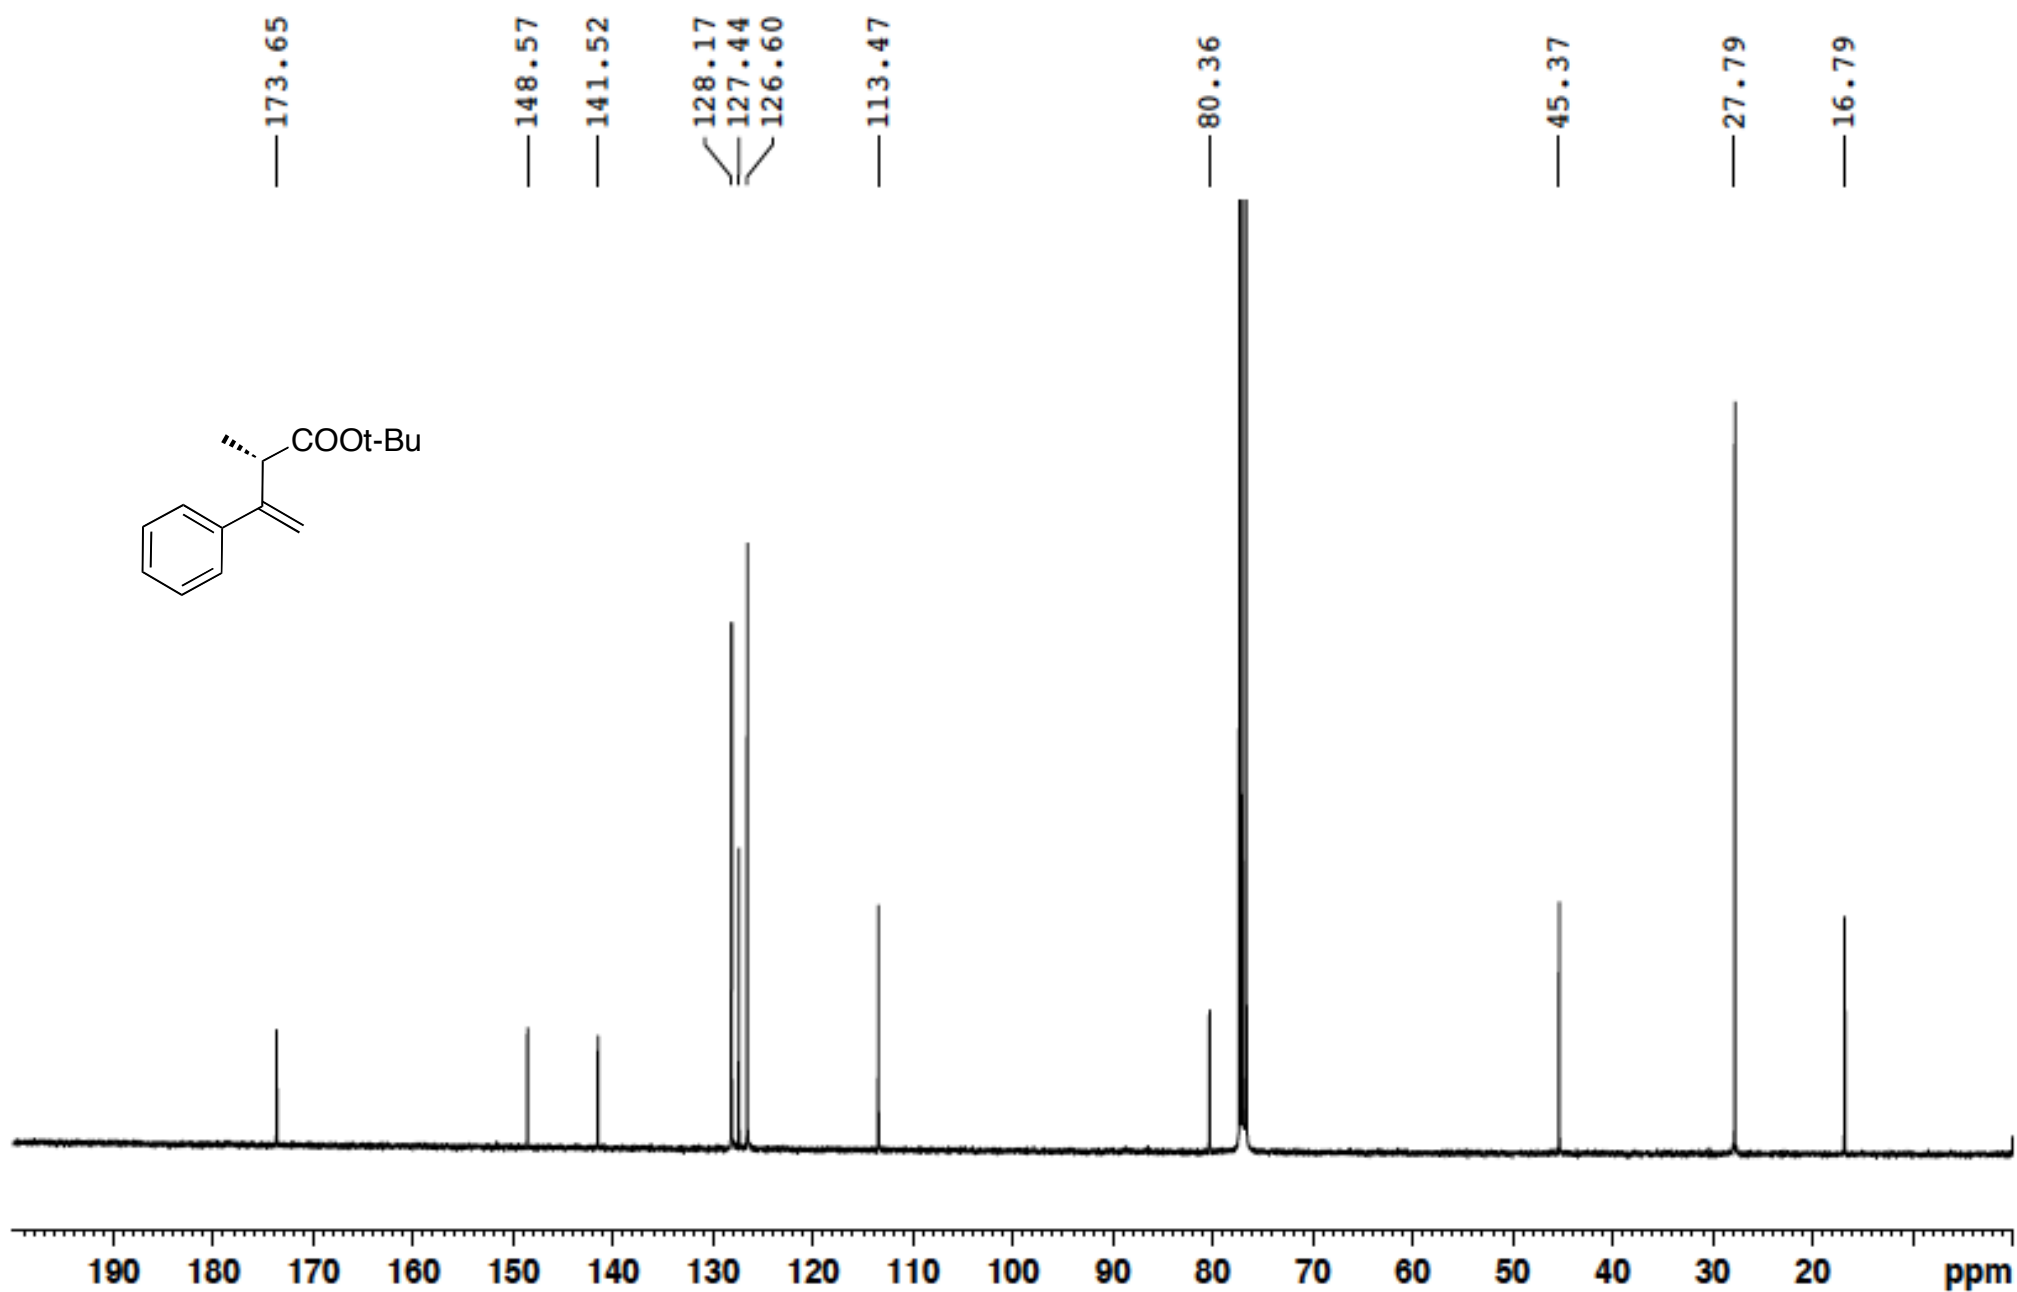

JF11-23-5, HNMR, CDCl<sub>3</sub> BBF02  
2013-07-05

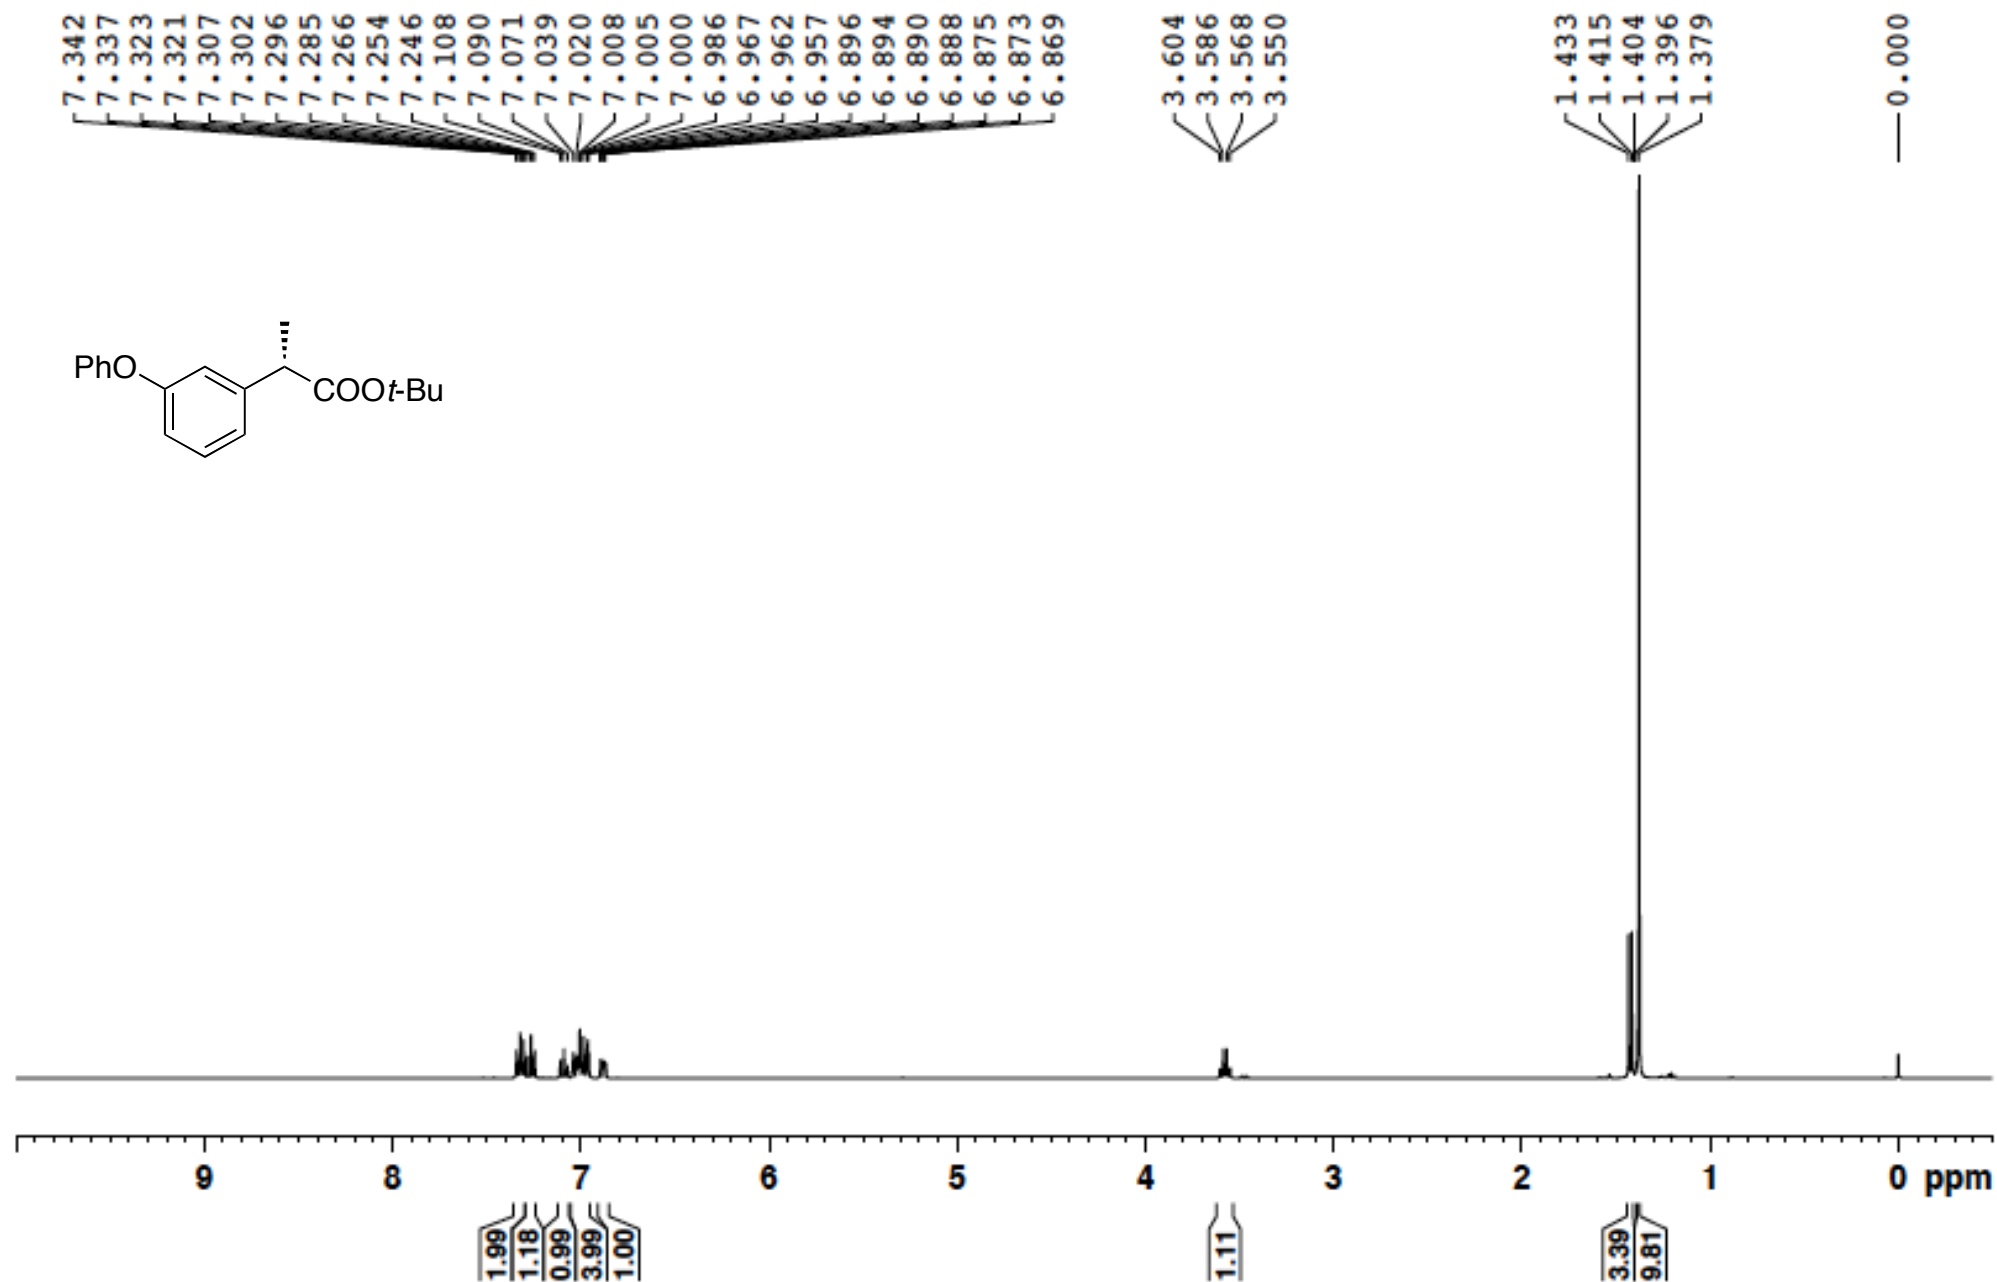

JF11-23-5, <sup>13</sup>CNMR, CDCl<sub>3</sub> BBFO2  
2013-07-05

— 173.40  
— 157.28  
— 143.18  
129.70  
129.67  
123.17  
122.35  
118.82  
118.13  
117.32  
— 80.58  
— 46.39  
— 27.93  
— 18.32

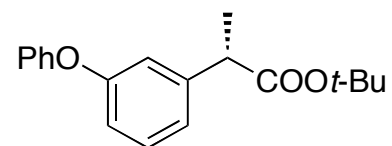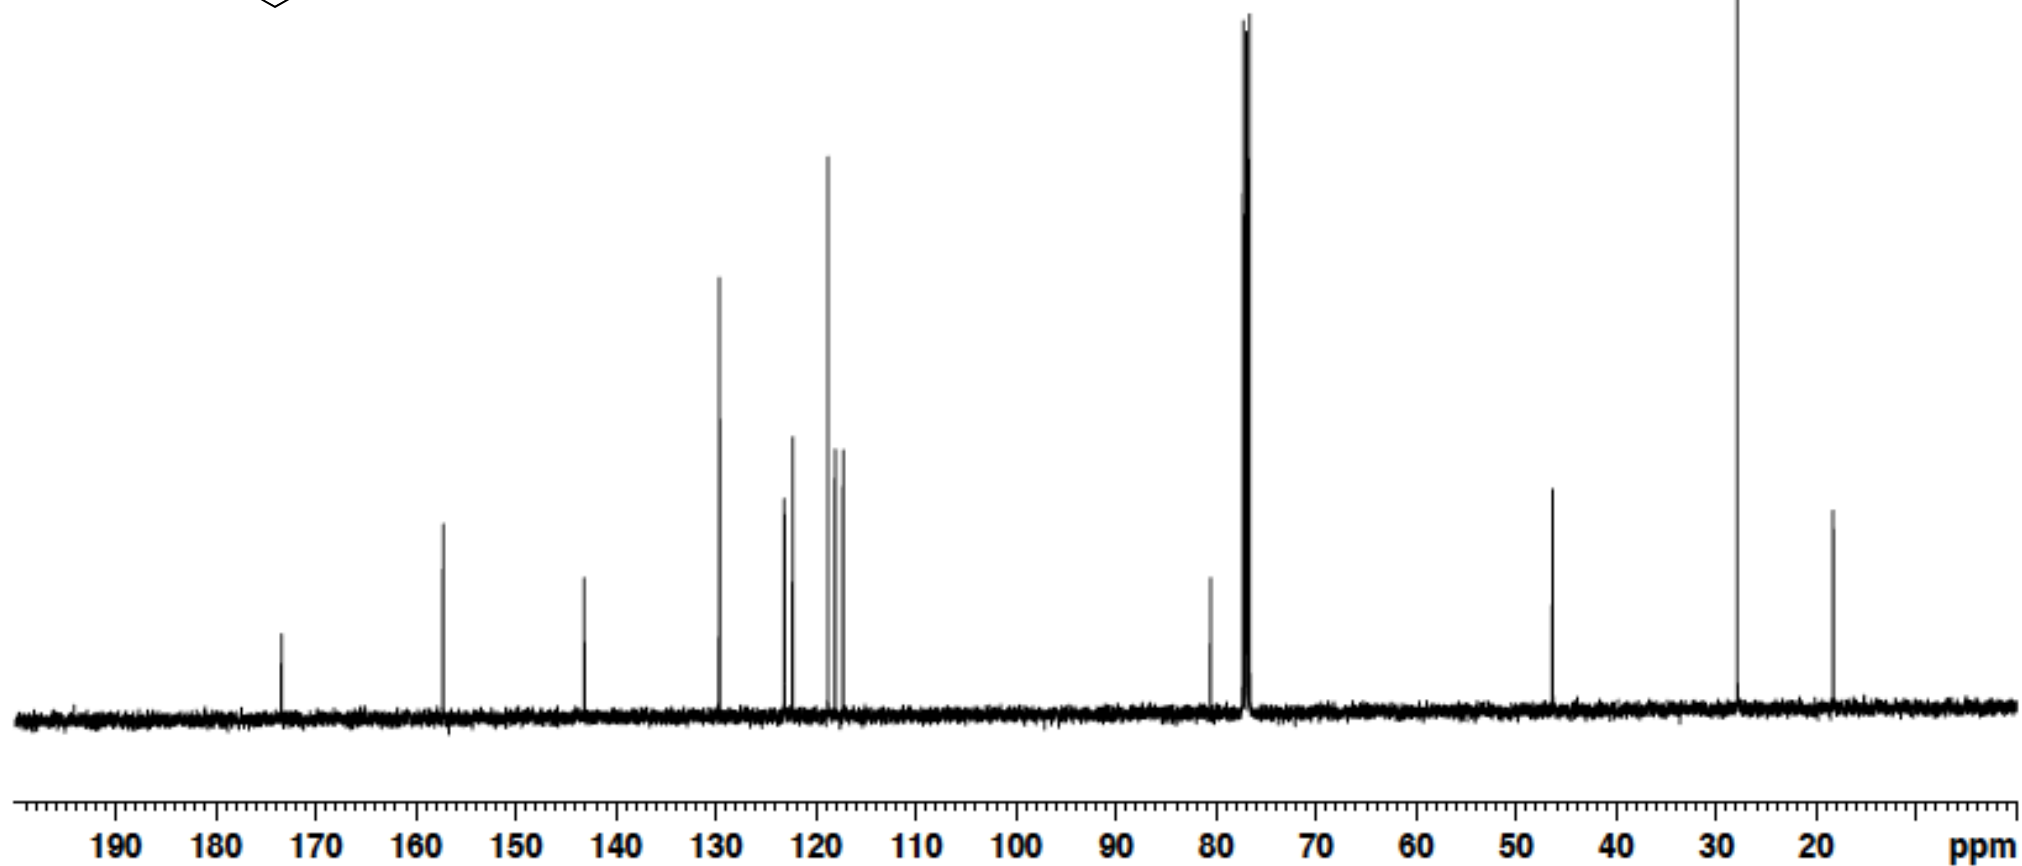

JF11-23-6, HNMR, CDCl<sub>3</sub> BBFO2  
2013-07-05

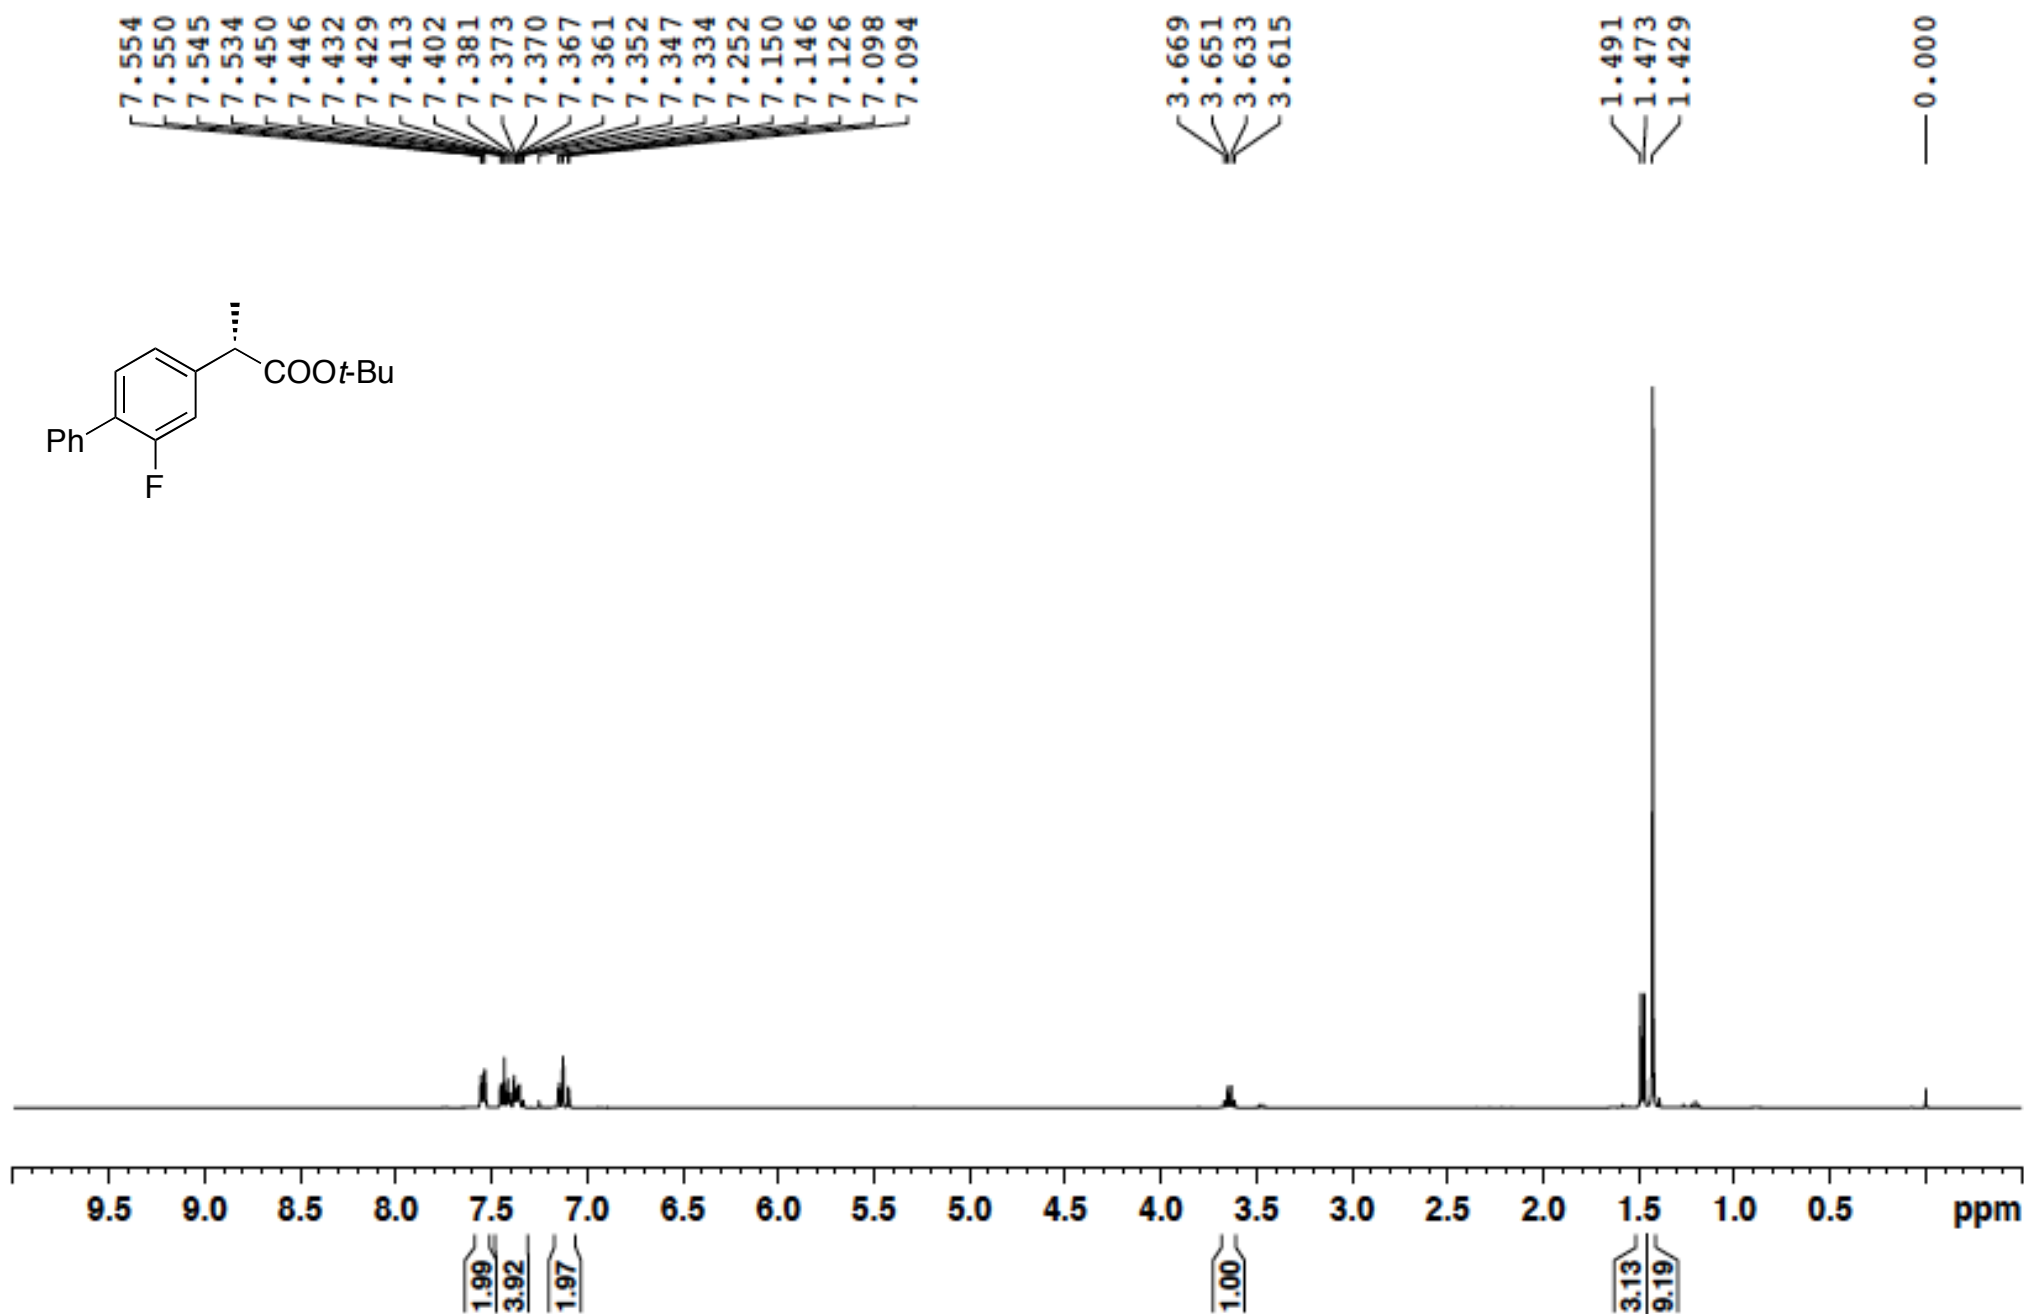

JF11-23-6,  $^{13}\text{C}$ NMR,  $\text{CDCl}_3$  BBFO2  
2013-07-05

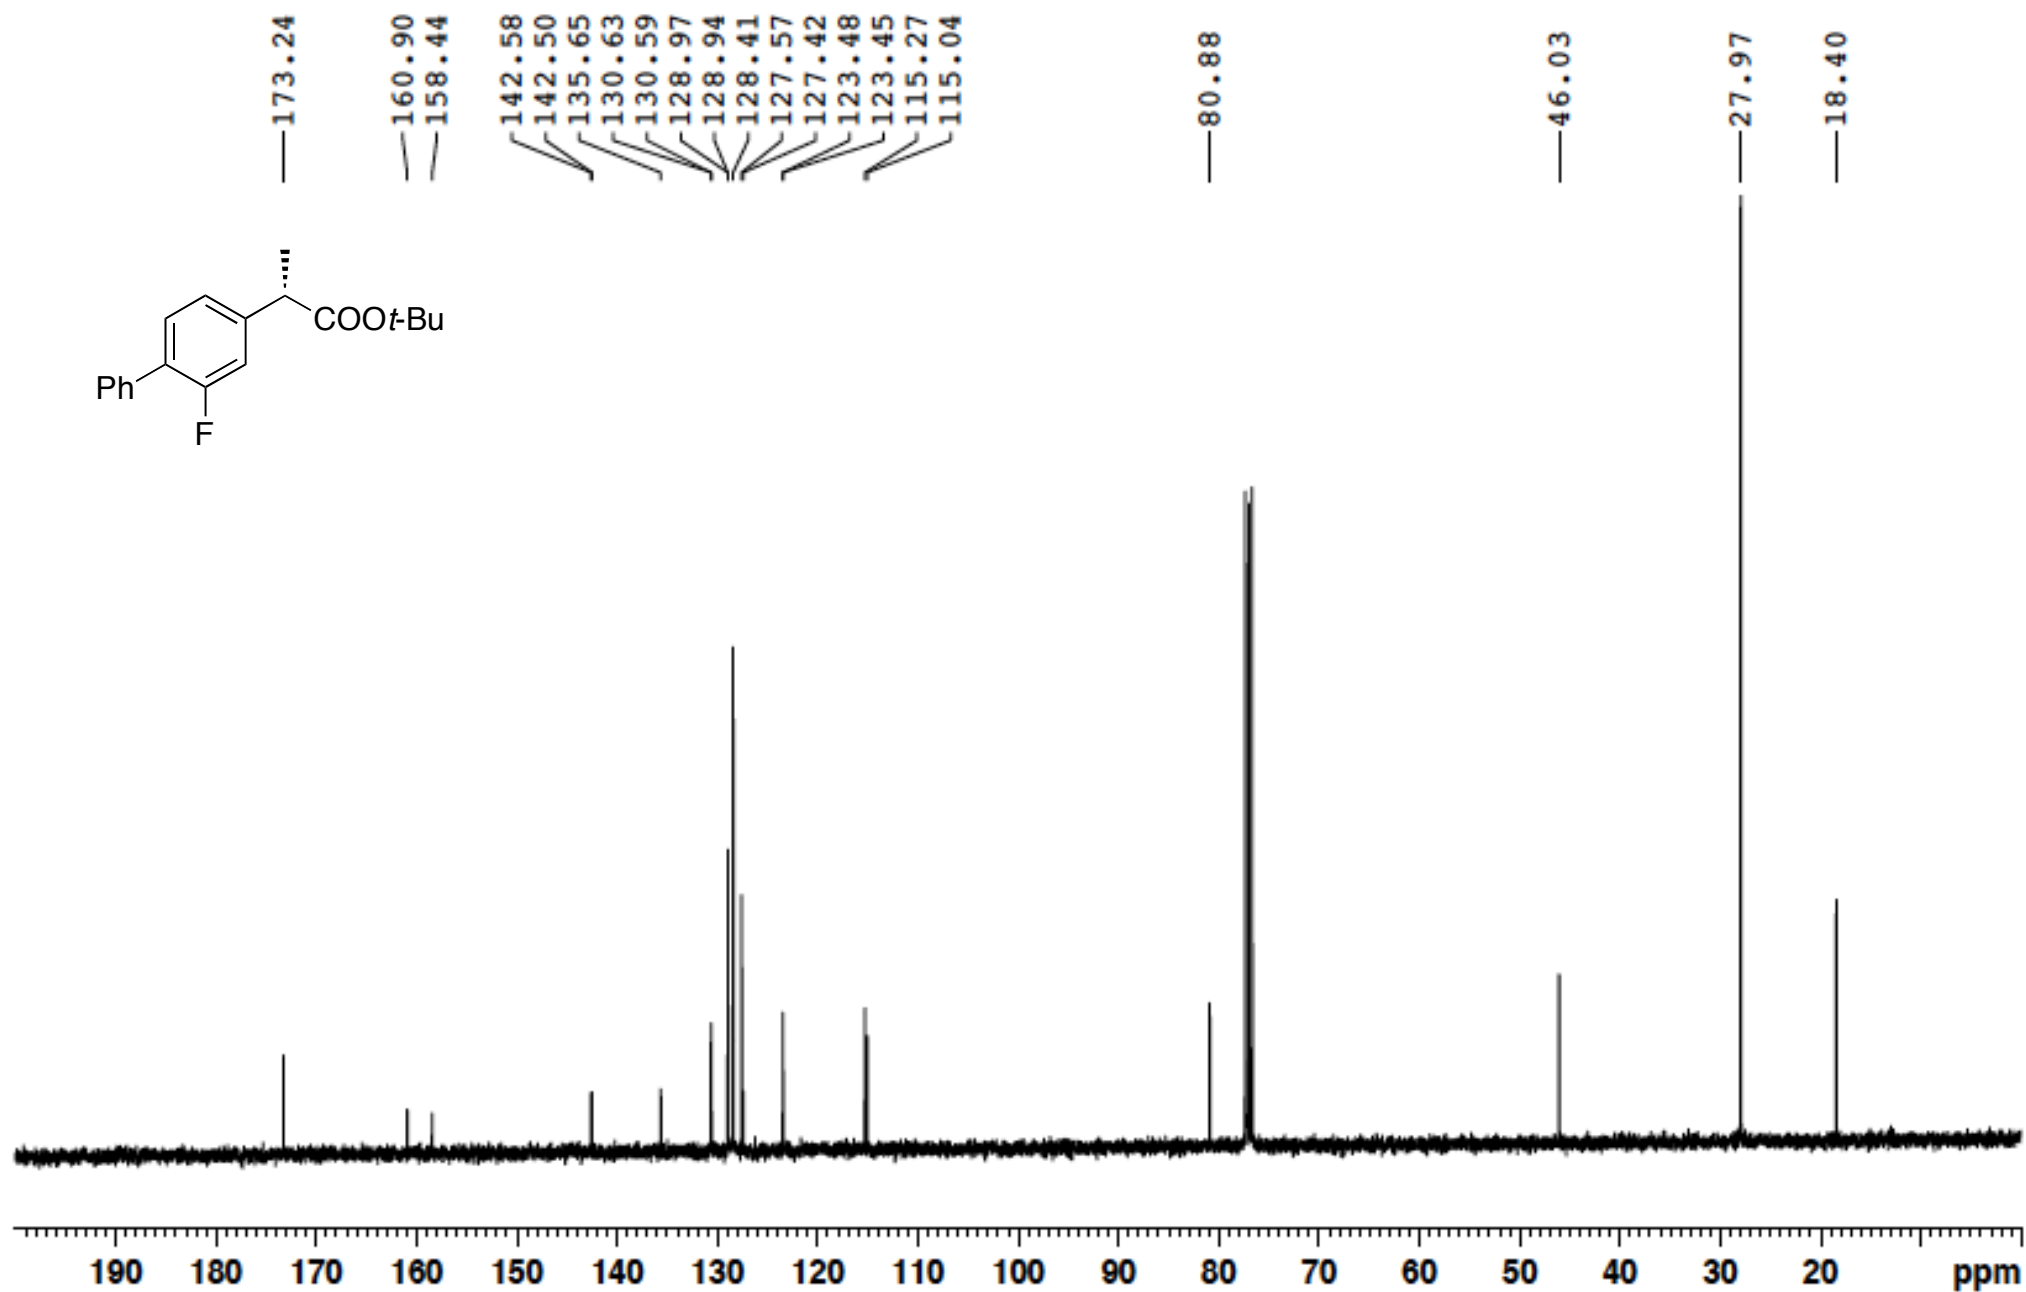



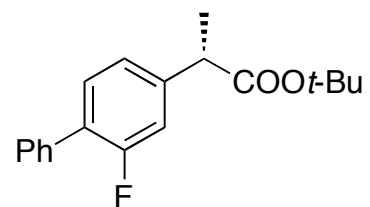

— -118.00

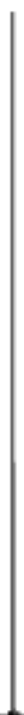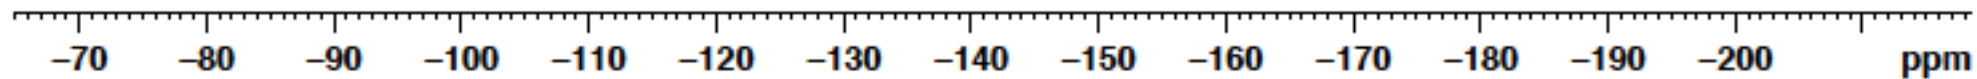

JF11-53-4 CDCl3 1HNMR BBFO2

2013-08-02

7.797  
7.792  
7.788  
7.732  
7.728  
7.691  
7.688  
7.684  
7.672  
7.669  
7.665  
7.612  
7.598  
7.593  
7.589  
7.578  
7.575  
7.572  
7.549  
7.530  
7.501  
7.482  
7.467  
7.463  
7.455  
7.436  
7.417  
7.261

3.714  
3.696  
3.678  
3.660

1.488  
1.470  
1.402

— 0.000

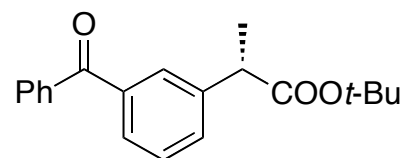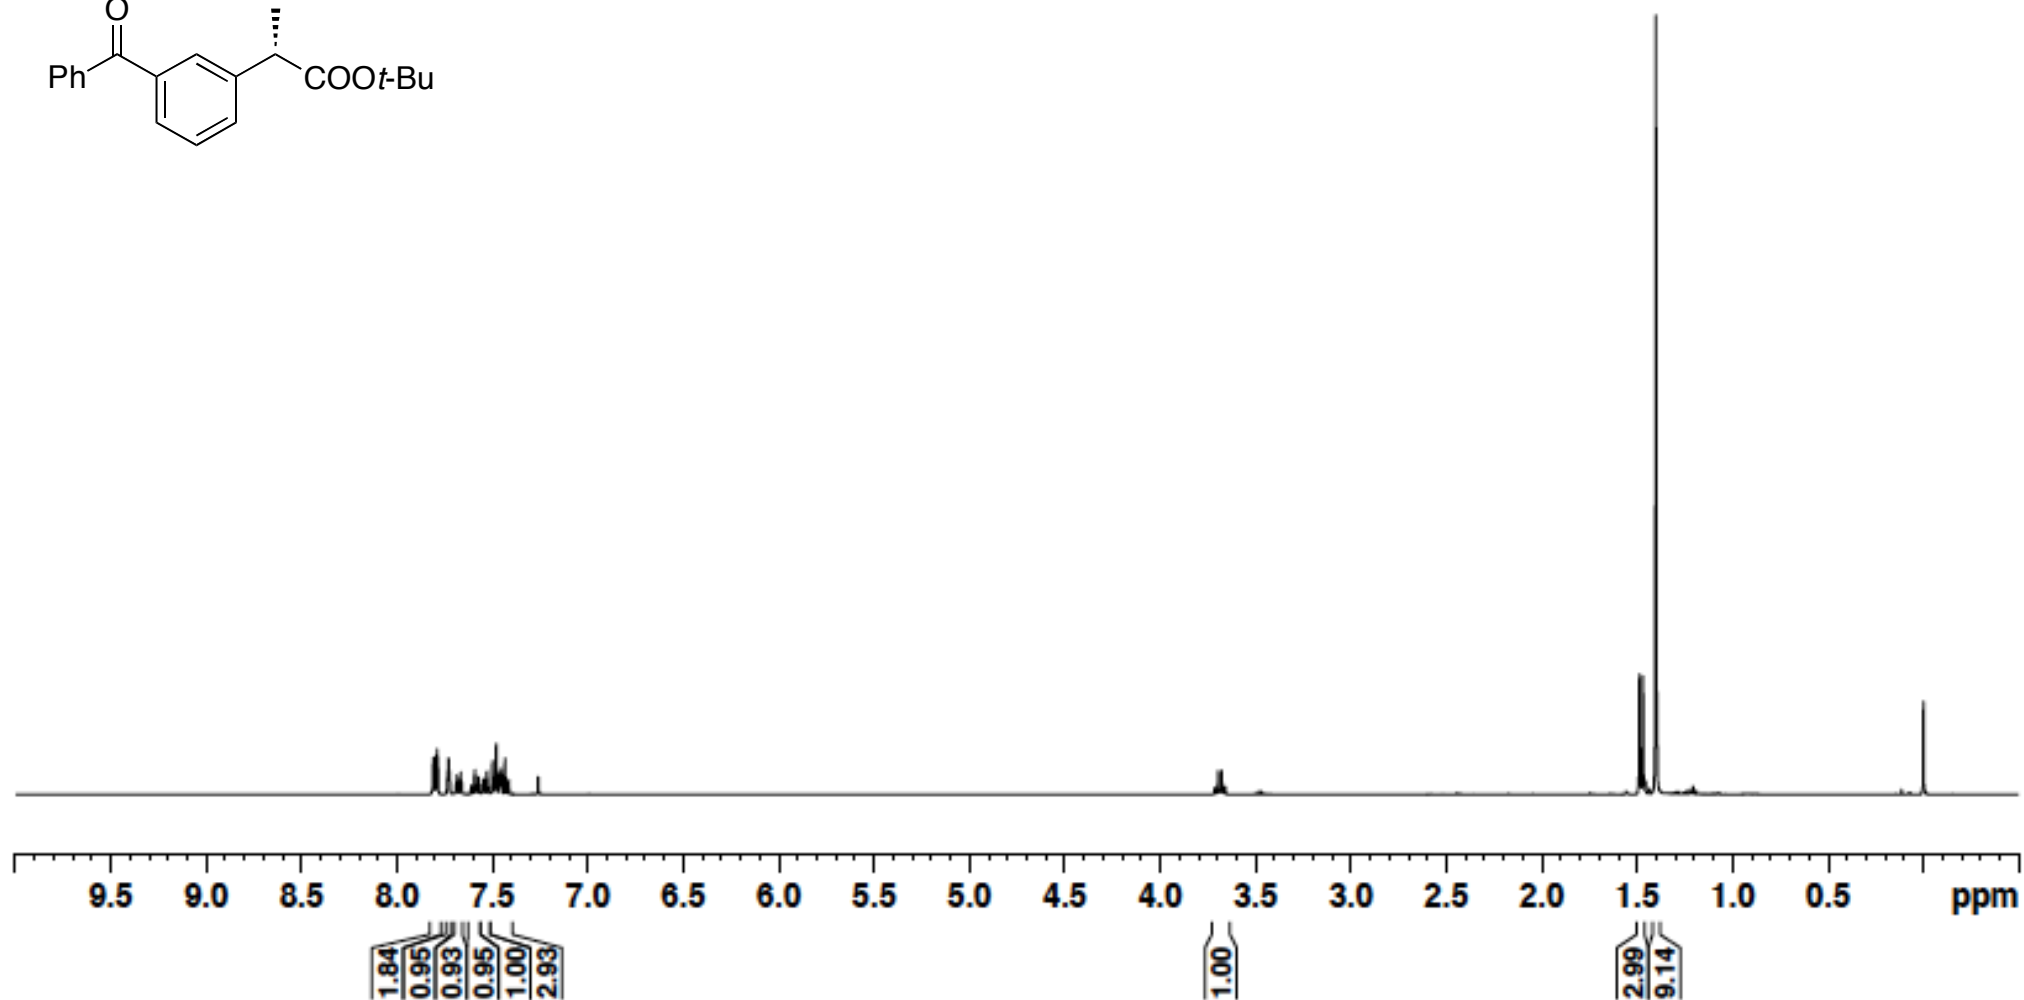

JF11-23-15 CDCl3 1HNMR BBF02  
2013-08-02

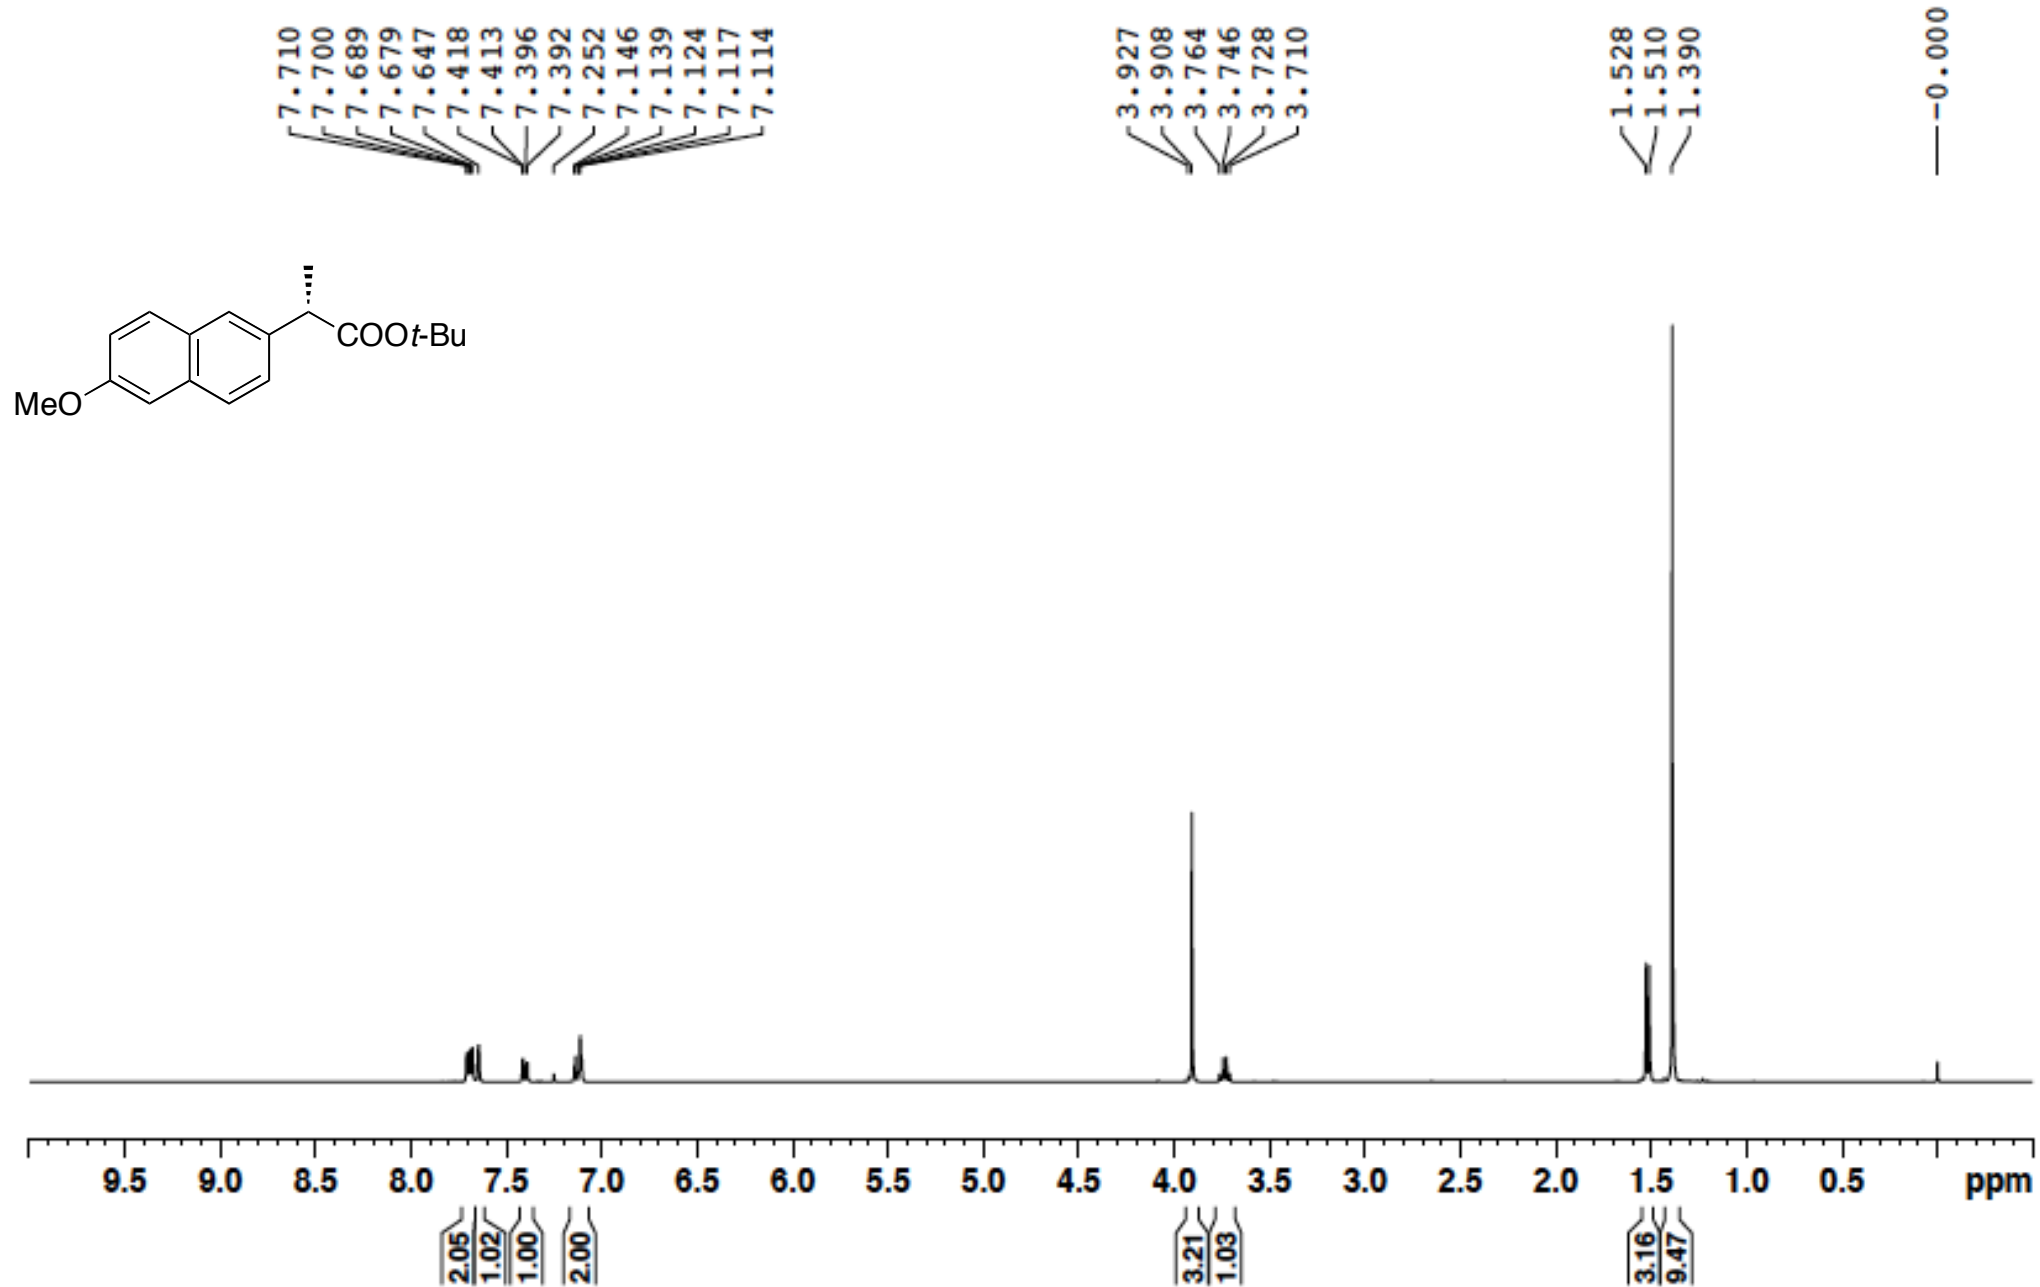

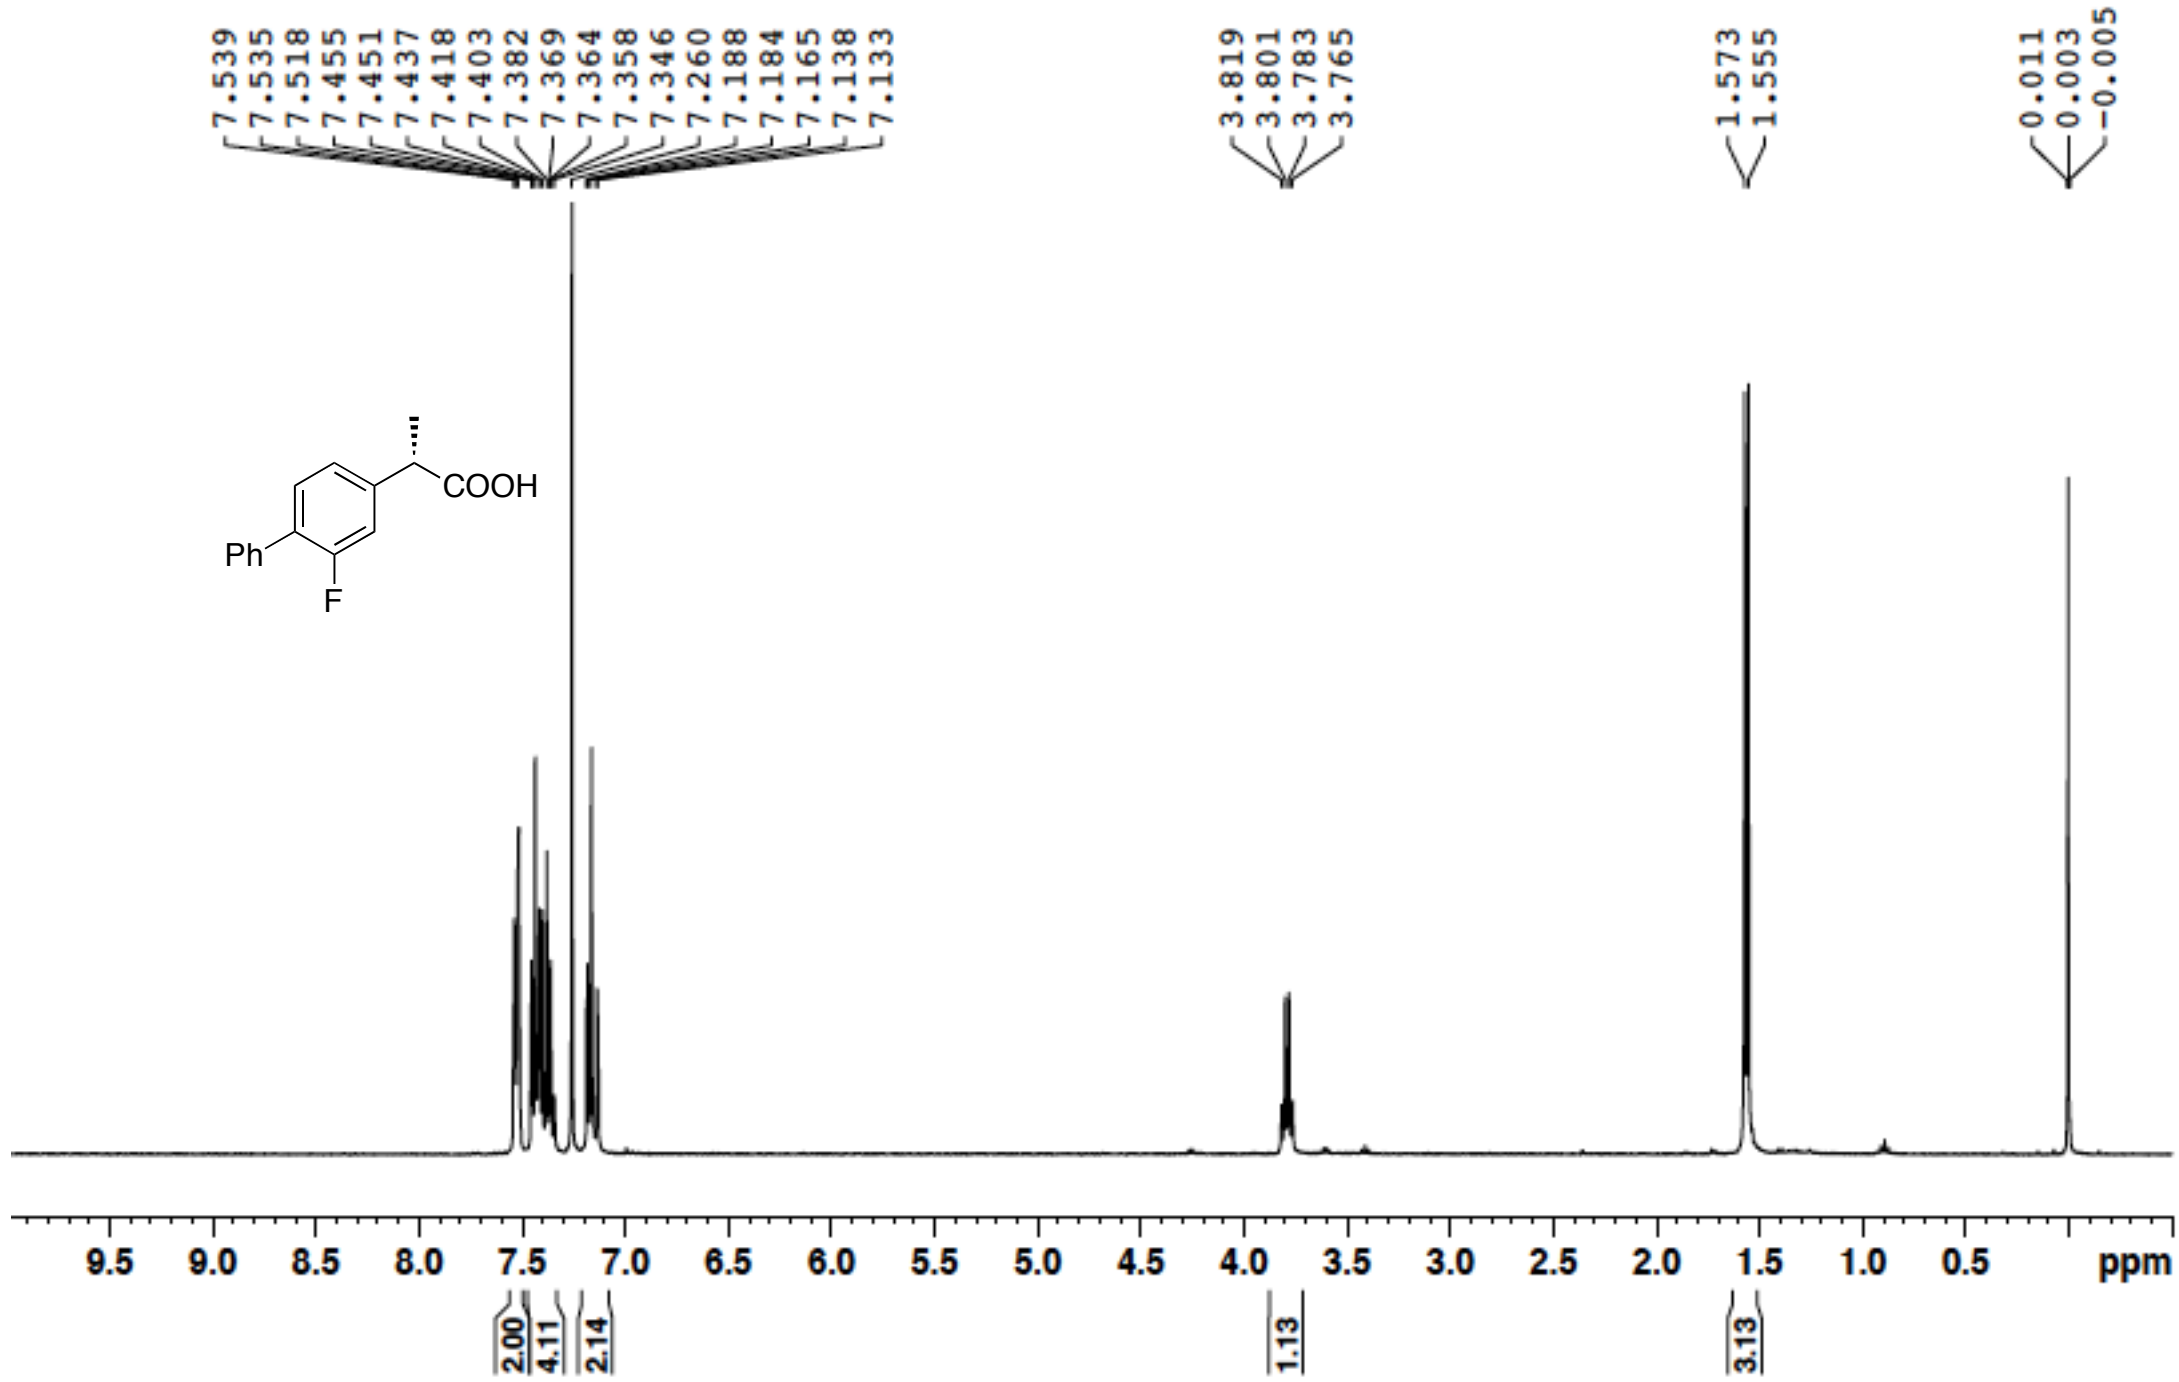

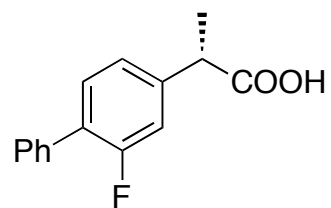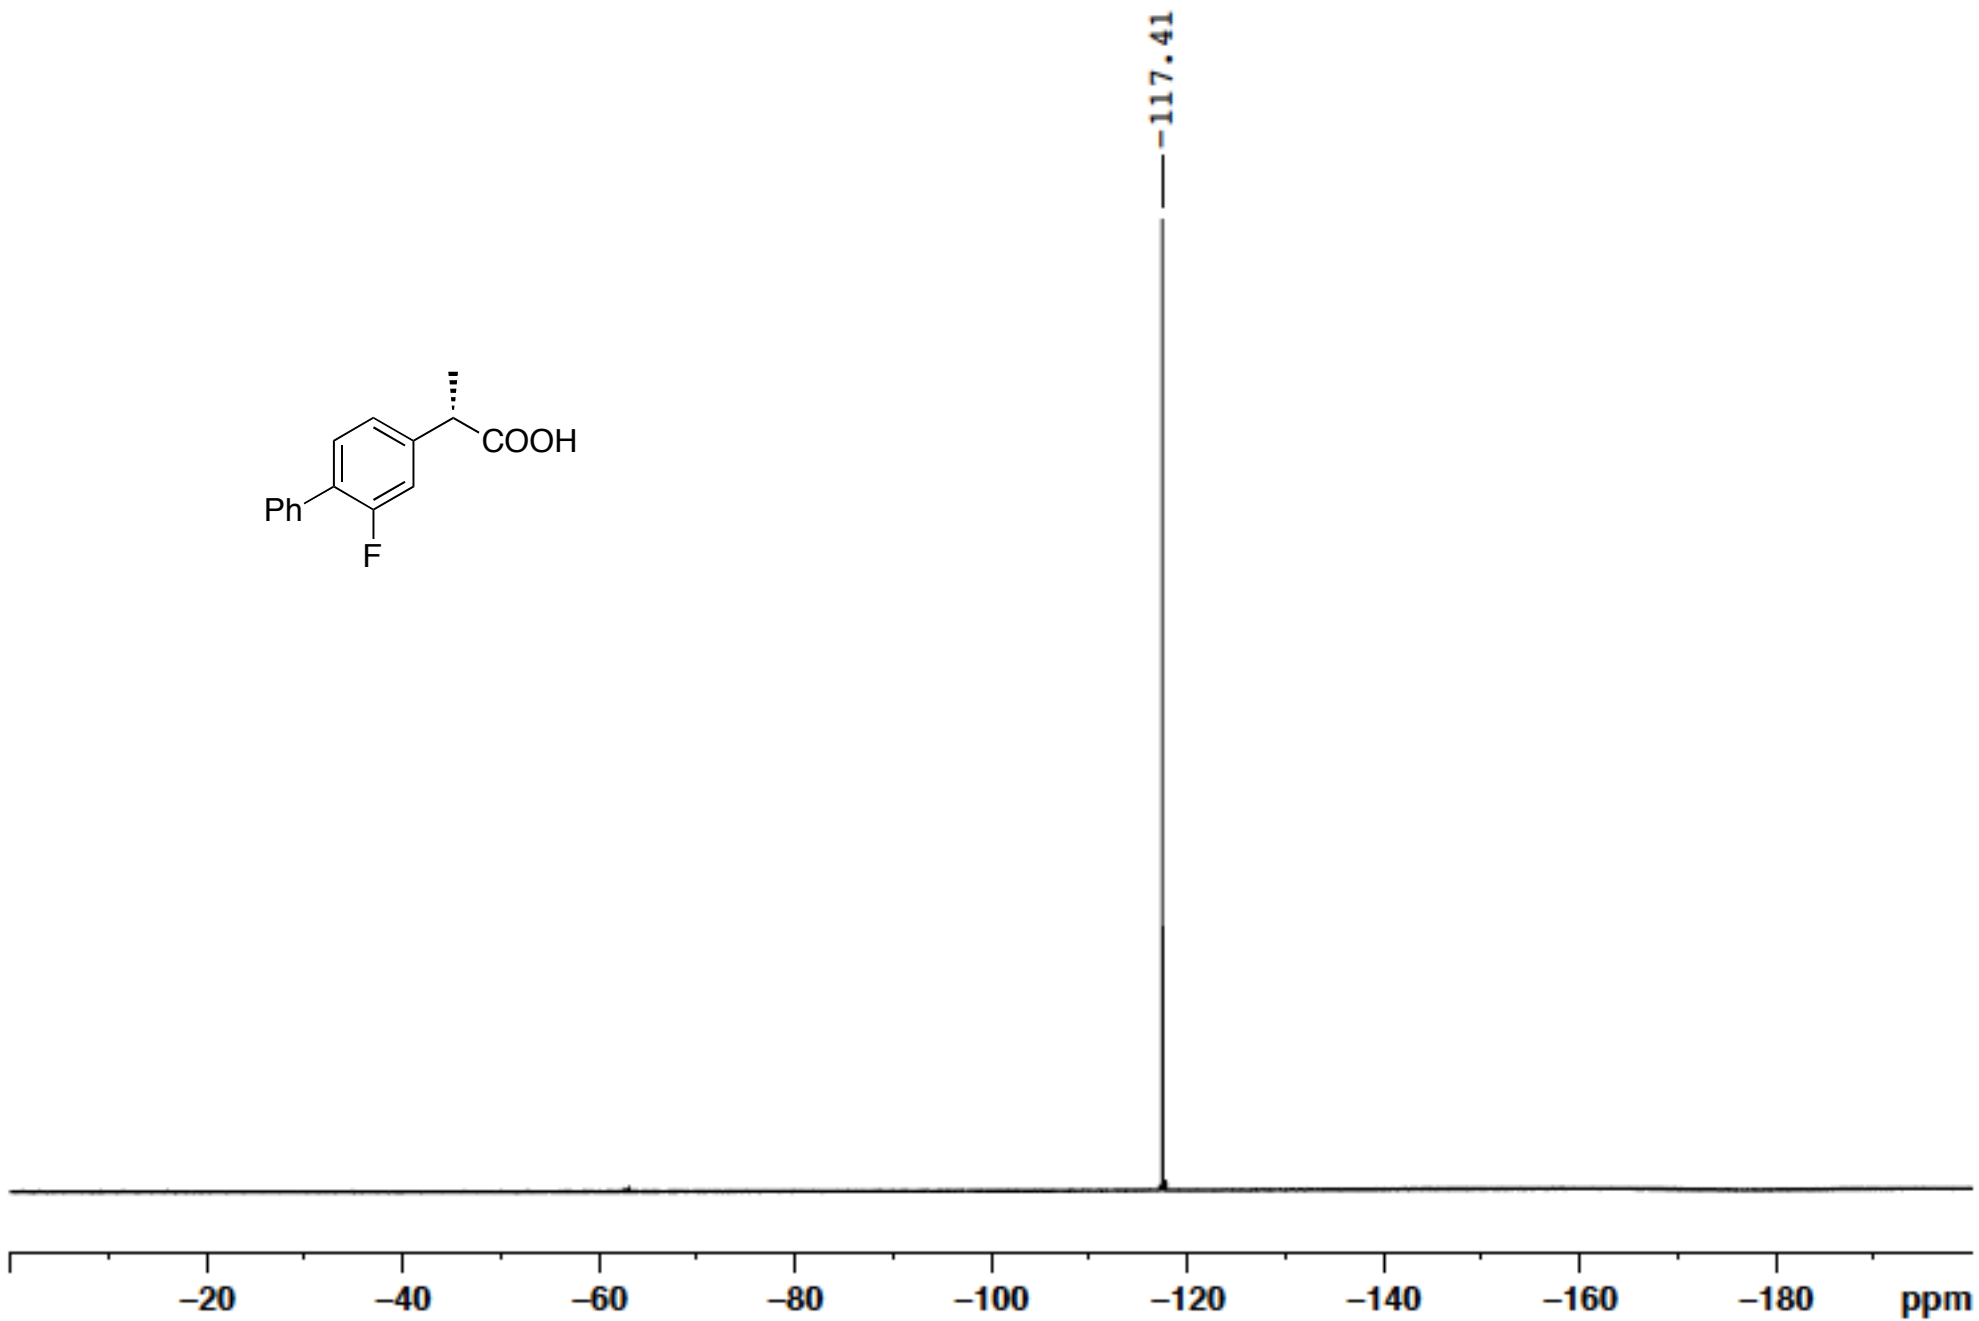

Supplement: c4qo00027g2.pdf [file c4qo00027g2.pdf]
